# Supplementary material for: Nickel-catalyzed cyclization of 1,7-enynes for the selective synthesis of dihydrocyclobuta[c]quinolin-3-ones and benzo[b]azocin-2-ones
Source: Royal Society of Chemistry journal article supplement (doi:10.1039/d1cc04750g), 2021-01-01

# Nickel-Catalyzed Cyclization of 1,7-Enynes for the Selective Synthesis of Dihydrocyclobuta[*c*]quinolin-3-ones and Benzo[*b*]azocin-2-ones

Qiao Li,<sup>a, b †</sup> Yun Cai,<sup>a †</sup> Yuanyuan Hu,<sup>a</sup> Hongwei Jin,<sup>a</sup> Fener Chen,<sup>b, c \*</sup> Yunkui Liu,<sup>a \*</sup> and Bingwei Zhou<sup>a \*</sup>

<sup>a</sup>College of Chemical Engineering, Zhejiang University of Technology, Hangzhou 310014, China.

E-mail: [ykuiliu@zjut.edu.cn](mailto:ykuiliu@zjut.edu.cn); [zhoubw@zjut.edu.cn](mailto:zhoubw@zjut.edu.cn)

<sup>b</sup>Institute of Pharmaceutical Science and Technology, Zhejiang University of Technology, Hangzhou, 310014, China.

<sup>c</sup>Engineering Center of Catalysis and Synthesis for Chiral Molecules, Department of Chemistry, Fudan University, Shanghai, 200433, China. E-mail: [rfchen@fudan.edu.cn](mailto:rfchen@fudan.edu.cn)

<sup>†</sup>These authors contributed equally.

## Table of Contents

|                                                           |     |
|-----------------------------------------------------------|-----|
| 1. General Information                                    | S2  |
| 2. Preparation of 1,7-Enynes                              | S3  |
| 3. Nickel-Catalyzed Divergent Cyclization of 1,7-Enynes   | S9  |
| 3.1 Optimization of reaction conditions                   | S9  |
| 3.2 Experimental details and characterization of products | S10 |
| 3.3 Gram-scale reaction                                   | S28 |
| 4. Mechanistic experiments                                | S29 |
| 4.1 Radical inhibition reaction                           | S29 |
| 4.2 Time evaluation for the model reaction                | S30 |
| 4.3 Formation of <b>3a</b> from <b>2a</b>                 | S30 |
| 5. X-Ray Crystallography of <b>2i</b>                     | S31 |
| 6. References                                             | S38 |
| 7. <sup>1</sup> H and <sup>13</sup> C NMR Spectra         | S39 |

## 1. General Information

Unless otherwise noted, all reactions were carried out in flame-dried reaction vessels with Teflon screw caps under nitrogen. Solvents were purified and dried according to standard methods prior to use. All commercially available reagents were obtained from chemical suppliers and used after proper purification if necessary. Flash column chromatography was performed on silica gel (200-300 mesh) with the indicated solvent mixtures. TLC analysis was performed on pre-coated, glass-backed silica gel plates and visualized with UV light.

The  $^1\text{H}$  NMR and  $^{13}\text{C}$  NMR spectra were recorded on a Bruker 500 AV spectrometers. Chemical shifts ( $\delta$ ) were reported as parts per million (ppm) downfield from tetramethylsilane and the following abbreviations were used to identify the multiplicities: s = singlet, d = doublet, t = triplet, q = quartet, m = multiplet, dd = doublet of doublets, dt = doublet of triplets, dq = doublet of quartets, br = broad and all combinations thereof can be explained by their integral parts. Coupling constant ( $J$ ) was reported in hertz unit (Hz). The high resolution mass spectra (HRMS) were recorded on an Agilent 6210 LC/TOF spectrometer.

## 2 Preparation of 1,7-Enynes

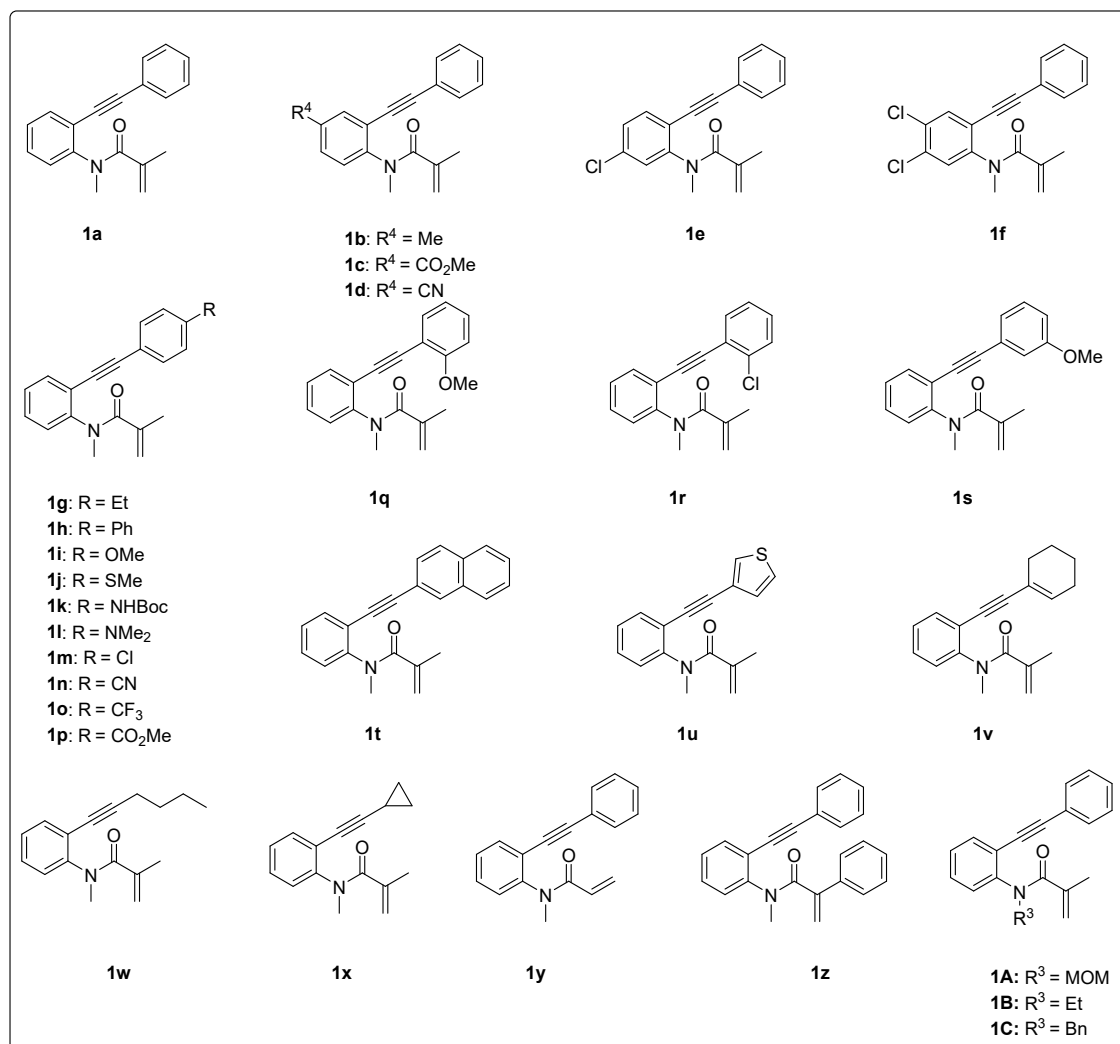

1, 7-Enynes are prepared according to the reported procedures<sup>1-4</sup>.

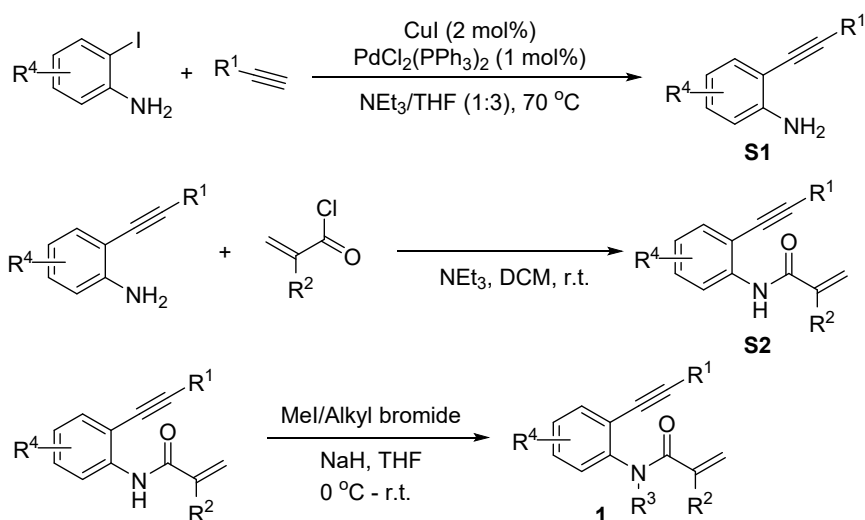

General procedure for synthesis of **S1**: To the suspension of Pd(PPh<sub>3</sub>)<sub>2</sub>Cl<sub>2</sub> (0.1 mmol, 1 mol%) and CuI (0.2 mmol, 2 mol%) in a mixture of THF (20 mL) and Et<sub>3</sub>N (20 mL), was added aryl iodide (10 mmol) and phenylacetylene (12 mmol). The mixture was allowed to react for 12 h at 70 °C. Then the crude mixture was filtered through a shot pad of celite and washed with CH<sub>2</sub>Cl<sub>2</sub> (10 mL) for three times, and the combined organic layer was concentrated under reduced pressure. The resulting crude mixture was purified by flash chromatography using ethyl acetate and petroleum ether as eluent.

General procedure for synthesis of **S2**: To a stirred solution of **S1** (1.0 equiv.) in CH<sub>2</sub>Cl<sub>2</sub> (5 mL) was added methacryloyl chloride (1.5 equiv.) and Et<sub>3</sub>N (2.0 equiv.). The resulted mixture was stirred at room temperature for 12 h. Then the reaction was quenched by saturated NaHCO<sub>3</sub> solution and the reaction mixture was extracted with CH<sub>2</sub>Cl<sub>2</sub> (3 × 5 mL). The combined organic layer was dried over anhydrous Na<sub>2</sub>SO<sub>4</sub> and concentrated in vacuo. The resulting crude mixture was purified by flash chromatography using ethyl acetate and petroleum as eluent.

General procedure for the synthesis of substrates **1**: To a solution of NaH (2.0 equiv.) in THF (5 mL) at 0 °C was added a solution of **S2** (1.0 equiv.) in THF dropwise and the reaction mixture was stirred for 30 min. Afterwards iodomethane or alkyl bromide (1.5 equiv.) was added and the reaction mixture was stirred at room temperature followed by TLC. The reaction was quenched by water and the reaction

mixture was extracted with CH<sub>2</sub>Cl<sub>2</sub> for three times. The combined organic layer was washed with brine and dried over anhydrous Na<sub>2</sub>SO<sub>4</sub>. The solvent was removed under vacuum and the residue was purified by a flash column chromatography on silica gel using ethyl acetate and petroleum as eluent.

Characterization of new compounds:

#### N-(4, 5-dichloro-2-(phenylethynyl)phenyl)-N-methylmethacrylamide (1f)

white solid, mp: 117-118 °C.

<sup>1</sup>H NMR (500 MHz, CDCl<sub>3</sub>) δ 7.64 (s, 1H), 7.54-7.51 (m, 2H), 7.40-7.37 (m, 3H), 7.31 (s, 1H), 5.08 (d, *J* = 34.5 Hz, 2H), 3.36 (s, 3H), 1.89 (s, 3H).

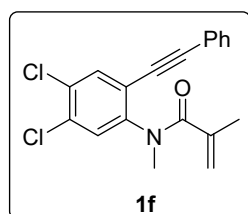

<sup>13</sup>C NMR (125 MHz, CDCl<sub>3</sub>) δ 172.03, 145.55, 140.02, 133.82, 132.87, 131.74, 131.66, 129.98, 129.32, 128.59, 122.31, 121.85, 119.76, 96.54, 83.74, 37.00, 20.05.

HRMS(ESI) Calculated for C<sub>19</sub>H<sub>16</sub>Cl<sub>2</sub>NO<sup>+</sup> ([M+H]<sup>+</sup>): 344.05307, found: 344.06035.

#### N-(2-((4-ethylphenyl)ethynyl)phenyl)-N-methylmethacrylamide (1g)

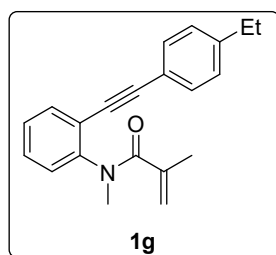

white solid, mp: 97-98 °C.

<sup>1</sup>H NMR (500 MHz, CDCl<sub>3</sub>) δ 7.55 (dd, *J*<sub>1</sub> = 7.4, *J*<sub>2</sub> = 1.2 Hz, 1H), 7.46 (d, *J* = 8.1 Hz, 2H), 7.34-7.27 (m, 2H), 7.19 (t, *J* = 7.2 Hz, 3H), 5.02 (d, *J* = 16.6 Hz, 2H), 3.38 (s, 3H), 2.67 (q, *J* = 7.6 Hz, 2H), 1.85 (s, 3H), 1.25 (t, *J* = 7.6 Hz, 3H).

<sup>13</sup>C NMR (125 MHz, CDCl<sub>3</sub>) δ 172.31, 146.28, 145.32, 140.50, 132.84, 131.66, 129.01, 128.20, 128.06, 127.45, 122.54, 119.78, 118.90, 95.10, 85.13, 36.86, 28.87, 20.15, 15.32.

HRMS(ESI) Calculated for C<sub>21</sub>H<sub>21</sub>NONa<sup>+</sup> ([M+Na]<sup>+</sup>): 326.16231, found: 326.1515

#### N-(2-([1,1'-biphenyl]-4-ylethynyl)phenyl)-N-methylmethacrylamide (1h)

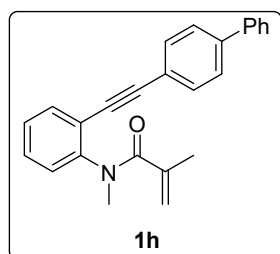

white solid, mp: 121-123 °C.

**<sup>1</sup>H NMR (500 MHz, CDCl<sub>3</sub>)** δ 7.65-7.61 (m, 7H), 7.48 (t, *J* = 7.5 Hz, 2H), 7.42-7.32 (m, 3H), 7.23 (d, *J* = 7.6 Hz, 1H), 5.06 (d, *J* = 9.8 Hz, 2H), 3.42 (s, 3H), 1.89 (s, 3H).

**<sup>13</sup>C NMR (125 MHz, CDCl<sub>3</sub>)** δ 172.42, 146.38, 141.53, 140.43, 140.23, 132.92, 132.12, 129.32, 128.93, 128.25, 127.79, 127.56, 127.20, 127.08, 122.31, 121.45, 119.19, 94.74, 86.45, 37.01, 20.24.

**HRMS(ESI)** Calculated for C<sub>25</sub>H<sub>22</sub>NO<sup>+</sup> ([M+H]<sup>+</sup>): 352.16231, found: 352.16959.

### N-methyl-N-(2-((4-(methylthio)phenyl)ethynyl)phenyl)methacrylamide (1j)

white solid, mp: 96-99 °C.

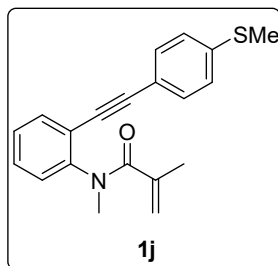

**<sup>1</sup>H NMR (500 MHz, CDCl<sub>3</sub>)** δ 7.54 (d, *J* = 7.4 Hz, 1H), 7.45 (d, *J* = 8.3 Hz, 2H), 7.36-7.29 (m, 2H), 7.21 (t, *J* = 7.5 Hz, 3H), 5.02 (s, 2H), 3.38 (s, 3H), 2.51 (d, *J* = 0.9 Hz, 3H), 1.85 (s, 3H).

**<sup>13</sup>C NMR (125 MHz, CDCl<sub>3</sub>)** δ 172.38, 146.24, 140.36, 140.16, 132.77, 131.90, 129.17, 128.19, 127.51, 125.77, 122.31, 119.16, 118.68, 94.64, 85.86, 36.97, 20.17, 15.26.

**HRMS(ESI)** Calculated for C<sub>20</sub>H<sub>20</sub>NOS<sup>+</sup> ([M+H]<sup>+</sup>): 322.11873, found: 322.12601.

### Tert-butyl(4-((2-(N-methylmethacrylamido)phenyl)ethynyl)phenyl)carbamate (1k)

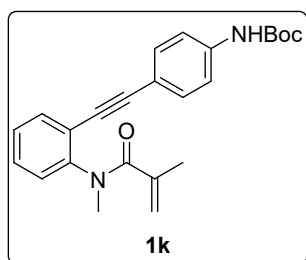

white solid, mp: 168-169 °C.

**<sup>1</sup>H NMR (500 MHz, CDCl<sub>3</sub>)** δ 7.52 (d, *J* = 6.5 Hz, 1H), 7.43 (dd, *J*<sub>1</sub> = 18.2, *J*<sub>2</sub> = 8.6 Hz, 4H), 7.32-7.27 (m, 2H), 7.18 (d, *J* = 7.5 Hz, 1H), 5.30 (s, 1H), 5.01 (d, *J* = 9.0 Hz, 2H), 3.37 (s, 3H), 1.84 (s, 3H), 1.52 (s, 9H).

**<sup>13</sup>C NMR (125 MHz, CDCl<sub>3</sub>)** δ 172.43, 152.51, 140.39, 139.24, 132.74, 132.48, 128.93, 128.13, 127.48, 122.56, 119.07, 118.19, 116.60, 94.94, 84.95, 80.77, 53.43, 36.95, 28.31, 20.12.

**HRMS(ESI)** Calculated for C<sub>24</sub>H<sub>26</sub>N<sub>2</sub>O<sub>3</sub>Na<sup>+</sup> ([M+Na]<sup>+</sup>): 413.19434, found:

413.18356.

### N-(2-((4-(dimethylamino)phenyl)ethynyl)phenyl)-N-methylmethacrylamide (1l)

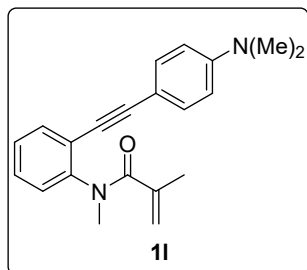

white solid, mp: 127-129 °C.

**<sup>1</sup>H NMR (500 MHz, CDCl<sub>3</sub>)** δ 7.54-7.49 (m, 1H), 7.41 (d, *J* = 8.7 Hz, 2H), 7.28-7.25 (m, 2H), 7.19-7.13 (m, 1H), 6.66 (d, *J* = 8.8 Hz, 2H), 5.02 (d, *J* = 26.3 Hz, 2H), 3.38 (s, 3H), 3.00 (s, 6H), 1.86 (s, 3H).

**<sup>13</sup>C NMR (125 MHz, CDCl<sub>3</sub>)** δ 172.38, 150.42, 145.78, 140.57, 132.86, 132.36, 128.19, 128.11, 127.37, 123.23, 118.72, 111.83, 109.27, 96.48, 83.98, 40.15, 36.78, 20.17.

**HRMS(ESI)** Calculated for C<sub>21</sub>H<sub>22</sub>N<sub>2</sub>ONa<sup>+</sup> ([M+Na]<sup>+</sup>): 341.17321, found: 341.16243.

### N-(2-((2-methoxyphenyl)ethynyl)phenyl)-N-methylmethacrylamide (1q)

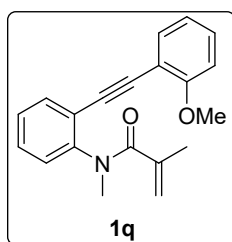

white solid, mp: 85-87 °C.

**<sup>1</sup>H NMR (500 MHz, CDCl<sub>3</sub>)** δ 7.59 (dd, *J*<sub>1</sub> = 7.3, *J*<sub>2</sub> = 1.7 Hz, 1H), 7.49 (dd, *J*<sub>1</sub> = 7.5, *J*<sub>2</sub> = 1.6 Hz, 1H), 7.34-7.28 (m, 3H), 7.15 (d, *J* = 7.1 Hz, 1H), 6.94 (dd, *J*<sub>1</sub> = 10.9, *J*<sub>2</sub> = 4.0 Hz, 1H), 6.90 (d, *J* = 8.3 Hz, 1H), 5.04 (d, *J* = 64.7 Hz, 2H), 3.91 (s, 3H), 3.40 (s,

3H), 1.84 (s, 3H).

**<sup>13</sup>C NMR (125 MHz, CDCl<sub>3</sub>)** δ 172.15, 160.27, 146.20, 140.66, 133.34, 132.91, 130.25, 128.95, 128.24, 127.43, 122.67, 120.47, 118.36, 111.97, 110.66, 91.60, 89.72, 55.69, 36.60, 20.20.

**HRMS(ESI)** Calculated for C<sub>20</sub>H<sub>19</sub>NO<sub>2</sub>Na<sup>+</sup> ([M+Na]<sup>+</sup>): 328.14158, found: 328.13080.

### N-(2-((2-chlorophenyl)ethynyl)phenyl)-N-methylmethacrylamide (1r)

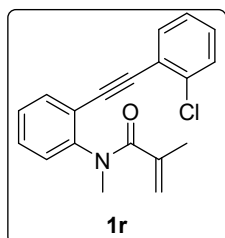

white solid, mp: 77-80 °C.

**<sup>1</sup>H NMR (500 MHz, CDCl<sub>3</sub>)** δ 7.61 (dd,  $J_1 = 7.5$ ,  $J_2 = 1.1$  Hz, 1H), 7.57 (dd,  $J_1 = 7.3$ ,  $J_2 = 1.9$  Hz, 1H), 7.44-7.41 (m, 1H), 7.38-7.34 (m, 1H), 7.32-7.25 (m, 3H), 7.17 (d,  $J = 7.6$  Hz, 1H), 5.04 (d,  $J = 40.4$  Hz, 2H), 3.39 (s, 3H), 1.84 (s, 3H).

**<sup>13</sup>C NMR (125 MHz, CDCl<sub>3</sub>)** δ 172.12, 146.37, 140.48, 135.93, 133.44, 133.32, 129.76, 129.66, 129.37, 128.32, 127.53, 126.60, 122.64, 121.91, 118.84, 91.44, 90.65, 36.92, 20.20.

**HRMS(ESI)** Calculated for C<sub>19</sub>H<sub>17</sub>ClNO<sup>+</sup> ([M+H]<sup>+</sup>): 310.09204, found: 310.09932.

### N-methyl-N-(2-(naphthalen-2-ylethynyl)phenyl)methacrylamide (1t)

white solid, mp: 102-104 °C.

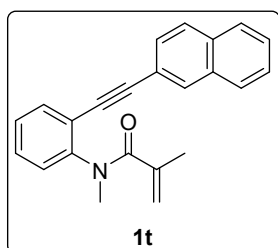

**<sup>1</sup>H NMR (500 MHz, CDCl<sub>3</sub>)** δ 8.08 (s, 1H), 7.88-7.83 (m, 3H), 7.64-7.58 (m, 2H), 7.55-7.51 (m, 2H), 7.39-7.31 (m, 2H), 7.23 (d,  $J = 7.5$  Hz, 1H), 5.07 (d,  $J = 15.0$  Hz, 2H), 3.45 (s, 3H), 1.89 (s, 3H).

**<sup>13</sup>C NMR (125 MHz, CDCl<sub>3</sub>)** δ 172.44, 146.38, 140.43, 133.03, 132.95, 131.67, 129.34, 128.24, 128.23, 127.95, 127.82, 127.57, 126.98, 126.72, 122.29, 119.86, 119.21, 95.23, 86.08, 37.06, 20.24.

**HRMS(ESI)** Calculated for C<sub>23</sub>H<sub>20</sub>NO<sup>+</sup> ([M+H]<sup>+</sup>): 326.14666, found: 326.15394.

### N-(2-(cyclohex-1-en-1-ylethynyl)phenyl)-N-methylmethacrylamide (1v)

white solid, mp: 57-60 °C.

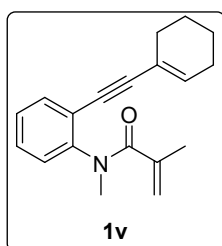

**<sup>1</sup>H NMR (500 MHz, CDCl<sub>3</sub>)** δ 7.43 (d,  $J = 7.0$  Hz, 1H), 7.28-7.21 (m, 2H), 7.11 (d,  $J = 7.5$  Hz, 1H), 6.23 (s, 1H), 4.98 (d,  $J = 9.9$  Hz, 2H), 3.30 (s, 3H), 2.21-2.12 (m, 4H), 1.82 (s, 3H), 1.69-1.59 (m, 4H).

**<sup>13</sup>C NMR (125 MHz, CDCl<sub>3</sub>)** δ 172.21, 145.94, 140.41, 136.36, 132.74, 128.63, 128.08, 127.41, 122.71, 120.36, 118.69, 96.84, 83.06, 36.66, 28.91, 25.78, 22.19, 21.40, 20.18.

**HRMS(ESI)** Calculated for C<sub>19</sub>H<sub>22</sub>NO<sup>+</sup> ([M+H]<sup>+</sup>): 280.16231, found: 280.16959.



### 3 Nickel-Catalyzed Divergent Cyclization of 1,7-Enynes

#### 3.1 Optimization of reaction conditions

Survey of the reaction parameters<sup>a</sup>

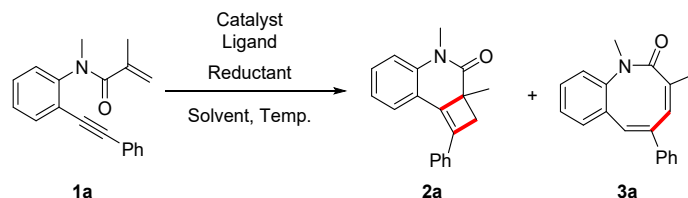

| Entry | Catalyst (mol%)                                        | Ligand (mol%)  | Reductant (equiv.) | Solvent            | Temp. (°C) | Yield/2a/3a (%) |
|-------|--------------------------------------------------------|----------------|--------------------|--------------------|------------|-----------------|
| 1     | NiBr <sub>2</sub> /10                                  | L1/10          | Zn/1               | THF                | 60         | 99/0            |
| 2     | NiBr <sub>2</sub> /10                                  | L1/10          | Zn/0.5             | THF                | 60         | 98/0            |
| 3     | NiBr <sub>2</sub> /10                                  | L1/10          | Zn/0.2             | THF                | 60         | 98/0            |
| 4     | NiBr <sub>2</sub> /10                                  | L1/10          | - <sup>b</sup>     | THF                | 60         | 0/0             |
| 5     | NiCl <sub>2</sub> /10                                  | L1/10          | Zn/0.2             | THF                | 60         | 89/0            |
| 6     | Ni(acac) <sub>2</sub> /10                              | L1/10          | Zn/0.2             | THF                | 60         | 0/0             |
| 7     | Ni(PPh <sub>3</sub> ) <sub>2</sub> Br <sub>2</sub> /10 | L1/10          | Zn/0.2             | THF                | 60         | 0/0             |
| 8     | NiCl <sub>2</sub> .glyme/10                            | L1/10          | Zn/0.2             | THF                | 60         | 0/0             |
| 9     | Ni(dppe)Cl <sub>2</sub> /10                            | L1/10          | Zn/0.2             | THF                | 60         | 0/0             |
| 10    | Ni(OAc) <sub>2</sub> /10                               | L1/10          | Zn/0.2             | THF                | 60         | 0/0             |
| 11    | Ni(OTf) <sub>2</sub> /10                               | L1/10          | Zn/0.2             | THF                | 60         | 5/0             |
| 12    | Ni(cod) <sub>2</sub> /10                               | L1/10          | - <sup>b</sup>     | THF                | 60         | 98/0            |
| 13    | NiBr <sub>2</sub> /10                                  | L2/10          | Zn/0.2             | THF                | 60         | 0/0             |
| 14    | NiBr <sub>2</sub> /10                                  | L3/10          | Zn/0.2             | THF                | 60         | 0/0             |
| 15    | NiBr <sub>2</sub> /10                                  | L4/10          | Zn/0.2             | THF                | 60         | 0/0             |
| 16    | NiBr <sub>2</sub> /10                                  | L5/10          | Zn/0.2             | THF                | 60         | 0/0             |
| 17    | NiBr <sub>2</sub> /10                                  | L6/20          | Zn/0.2             | THF                | 60         | 0/0             |
| 18    | NiBr <sub>2</sub> /10                                  | L7/20          | Zn/0.2             | THF                | 60         | 0/0             |
| 19    | NiBr <sub>2</sub> /10                                  | L8/10          | Zn/0.2             | THF                | 60         | 0/0             |
| 20    | NiBr <sub>2</sub> /10                                  | L9/10          | Zn/0.2             | THF                | 60         | 0/0             |
| 21    | NiBr <sub>2</sub> /10                                  | L1/10          | Zn/0.2             | Toluene            | 60         | 86/0            |
| 22    | NiBr <sub>2</sub> /10                                  | L1/10          | Zn/0.2             | CH <sub>3</sub> CN | 60         | 0/0             |
| 23    | NiBr <sub>2</sub> /10                                  | L1/10          | Zn/0.2             | DMF                | 60         | 35/0            |
| 24    | NiBr <sub>2</sub> /10                                  | L1/10          | Zn/0.2             | Dioxane            | 60         | 94/0            |
| 25    | NiBr <sub>2</sub> /10                                  | L1/10          | Fe/0.2             | THF                | 60         | 0/0             |
| 26    | NiBr <sub>2</sub> /10                                  | L1/10          | Mn/0.2             | THF                | 60         | 95/0            |
| 27    | NiBr <sub>2</sub> /5                                   | L1/5           | Zn/0.2             | THF                | 60         | 98/0            |
| 28    | - <sup>c</sup>                                         | L1/5           | Zn/0.2             | THF                | 60         | 0/0             |
| 29    | NiBr <sub>2</sub> /5                                   | - <sup>d</sup> | Zn/0.2             | THF                | 60         | 0/0             |
| 30    | NiBr <sub>2</sub> /1 <sup>e</sup>                      | L1/1           | Zn/0.2             | THF                | 60         | 63/0            |
| 31    | NiBr <sub>2</sub> /5                                   | L1/5           | Zn/0.2             | THF                | 80         | 81/18           |
| 32    | NiBr <sub>2</sub> /5                                   | L1/5           | Zn/0.2             | THF                | 100        | 50/47           |

|    |                      |              |        |     |     |      |
|----|----------------------|--------------|--------|-----|-----|------|
| 33 | NiBr <sub>2</sub> /5 | <b>L1</b> /5 | Zn/0.2 | THF | 120 | 8/91 |
| 34 | NiBr <sub>2</sub> /5 | <b>L1</b> /5 | Zn/0.2 | THF | 140 | 0/98 |

<sup>a</sup>Reaction conditions unless otherwise noted: **1a** (0.1 mmol), catalyst, ligand, reductant, solvent (1 mL), 60-140 °C, 6 h under N<sub>2</sub> atmosphere. Isolated yields were given. <sup>b</sup>No reductant. <sup>c</sup>No catalyst. <sup>d</sup>No ligand. <sup>e</sup>For 24 h.

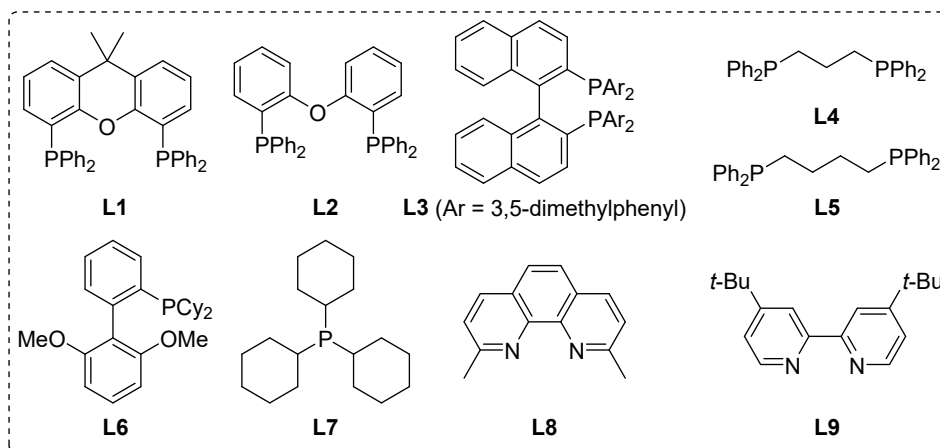

### 3.2 Experimental details and characterization of products

General procedure for the synthesis of dihydrocyclobuta[*c*]quinolin-3-ones **2**: In a 25 mL flame-dried Schlenk tube, **1**, 7-Enynes (0.4 mmol), NiBr<sub>2</sub> (5 mol%, 0.02 mmol), **L1** (5 mol%, 0.02 mmol), Zn (0.2 equiv, 0.08 mmol), THF (4 mL) were added sequentially under nitrogen. The tube was sealed and stirred at 60 °C for 6 h. After completion, the reaction mixture was filtered through a short pad of silica gel and washed with ethyl acetate (20 mL). The combined organic phase was concentrated and purified by silica gel column chromatography (Petroleum ether : Ethyl acetate = 50 : 1) to provide the product **2**.

General procedure for the synthesis of benzo[*b*]azocin-2-ones **3**: In a 25 mL flame-dried Schlenk tube, **1**, 7-Enynes (0.4 mmol), NiBr<sub>2</sub> (5 mol%, 0.02 mmol), **L1** (5 mol%, 0.02 mmol), Zn (0.2 equiv, 0.08 mmol), THF (4 mL) were added sequentially under nitrogen. The tube was sealed and stirred at 140 °C for 6 h. After completion, the reaction mixture was filtered through a short pad of silica gel and washed with ethyl acetate (20 mL). The combined organic phase was concentrated and purified by silica gel column chromatography (Petroleum ether : Ethyl acetate = 10 : 1) to provide the product **3**.

### 2a,4-dimethyl-1-phenyl-2,4-dihydrocyclobuta[*c*]quinolin-3(2*aH*)-one (2a)

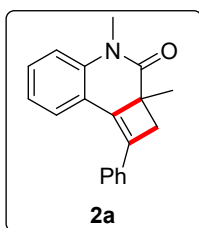

Yield: 98% (107.8 mg), white solid, mp: 78-79 °C.

**<sup>1</sup>H NMR (500 MHz, CDCl<sub>3</sub>)** δ 7.69 (d, *J* = 7.4 Hz, 1H), 7.55 (d, *J* = 7.6 Hz, 2H), 7.42-7.28 (m, 4H), 7.17 (t, *J* = 7.5 Hz, 1H), 7.09 (d, *J* = 8.2 Hz, 1H), 3.38 (s, 3H), 3.35 (d, *J* = 13.7 Hz, 1H), 2.90 (d, *J* = 13.5 Hz, 1H), 1.36 (s, 3H).

**<sup>13</sup>C NMR (125 MHz, CDCl<sub>3</sub>)** δ 174.06, 141.66, 138.47, 137.26, 134.55, 128.70, 128.53, 128.43, 125.83, 125.78, 122.70, 121.89, 115.70, 43.03, 39.59, 30.13, 21.79.

**HRMS(ESI)** Calculated for C<sub>19</sub>H<sub>18</sub>NO<sup>+</sup> ([M+H]<sup>+</sup>): 276.13101, found: 276.13829.

### 2a,4,7-trimethyl-1-phenyl-2,4-dihydrocyclobuta[*c*]quinolin-3(2*aH*)-one (2b)

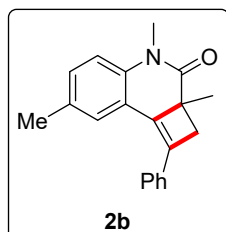

Yield: 90% (140.1 mg), white solid, mp: 136-137 °C.

**<sup>1</sup>H NMR (500 MHz, CDCl<sub>3</sub>)** δ 7.6-7.53 (m, 2H), 7.50 (d, *J* = 1.4 Hz, 1H), 7.39 (t, *J* = 7.5 Hz, 2H), 7.31 (t, *J* = 7.4 Hz, 1H), 7.16 (dd, *J*<sub>1</sub> = 8.3, *J*<sub>2</sub> = 1.4 Hz, 1H), 6.99 (d, *J* = 8.3 Hz, 1H), 3.36 (d, 4H, overlap), 2.90 (d, *J* = 13.4 Hz, 1H), 2.43 (s, 3H), 1.37 (s, 3H).

**<sup>13</sup>C NMR (125 MHz, CDCl<sub>3</sub>)** δ 173.98, 139.40, 138.18, 137.52, 134.67, 132.26, 129.28, 128.55, 128.37, 126.25, 125.83, 121.85, 115.63, 43.07, 39.53, 30.12, 21.80, 20.83.

**HRMS(ESI)** Calculated for C<sub>20</sub>H<sub>20</sub>NO<sup>+</sup> ([M+H]<sup>+</sup>): 290.14666, found: 290.15394.

### Methyl 2a,4-dimethyl-3-oxo-1-phenyl-2,2a,3,4-tetrahydrocyclobuta[*c*]quinoline-6-carboxylate (2c)

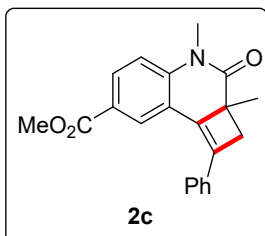

Yield: 80% (106.6 mg), white solid, mp: 155-156 °C.

**<sup>1</sup>H NMR (500 MHz, CDCl<sub>3</sub>)** δ 8.36 (d, *J* = 1.9 Hz, 1H), 8.03 (dd, *J*<sub>1</sub> = 8.6, *J*<sub>2</sub> = 1.9 Hz, 1H), 7.59-7.52 (m, 2H), 7.39 (t, *J* = 7.5 Hz, 2H), 7.32 (t, *J* = 7.4 Hz, 1H), 7.13 (d, *J* = 8.7 Hz, 1H), 3.97 (s, 3H), 3.41 (s, 3H), 3.38 (d, *J* = 13.6 Hz, 1H), 2.93 (d, *J* = 13.6 Hz, 1H), 1.36 (s, 3H).

**<sup>13</sup>C NMR (125 MHz, CDCl<sub>3</sub>)** 174.02, 166.41, 145.23, 139.85, 135.76, 134.22, 130.31, 128.80, 128.68, 127.04, 126.00, 124.37, 121.60, 115.35, 52.22, 42.94, 39.78, 30.35, 21.72.

**HRMS(ESI)** Calculated for C<sub>21</sub>H<sub>20</sub>NO<sub>3</sub><sup>+</sup> ([M+H]<sup>+</sup>): 334.13649, found: 334.14377.

**2a,4-dimethyl-3-oxo-1-phenyl-2,2a,3,4-tetrahydrocyclobuta[c]quinoline-7-carbonitrile (2d)**

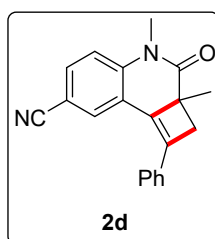

Yield: 87% (104.4 mg), white solid, mp: 164-167 °C.

**<sup>1</sup>H NMR (500 MHz, CDCl<sub>3</sub>)** δ 7.85 (d, *J* = 1.9 Hz, 1H), 7.55 (dd, *J*<sub>1</sub> = 8.6, *J*<sub>2</sub> = 1.9 Hz, 1H), 7.43-7.39 (m, 2H), 7.36-7.31 (m, 2H), 7.30-7.24 (m, 1H), 7.07 (d, *J* = 8.6 Hz, 1H), 3.30 (d, 4H, overlap), 2.86 (d, *J* = 13.8 Hz, 1H), 1.28 (s, 3H).

**<sup>13</sup>C NMR (125 MHz, CDCl<sub>3</sub>)** δ 173.66, 144.99, 141.56, 134.11, 133.82, 132.58, 129.30, 129.07, 128.83, 126.05, 122.47, 118.77, 116.13, 105.93, 42.86, 40.02, 30.35, 21.71.

**HRMS(ESI)** Calculated for C<sub>20</sub>H<sub>17</sub>N<sub>2</sub>O<sup>+</sup> ([M+H]<sup>+</sup>): 301.12626, found: 301.13354.

**6-chloro-2a,4-dimethyl-1-phenyl-2,4-dihydrocyclobuta[c]quinolin-3(2aH)-one (2e)**

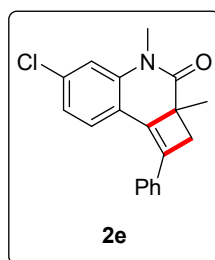

Yield: 75% (92.7 mg), white solid, mp: 111-112 °C.

**<sup>1</sup>H NMR (500 MHz, CDCl<sub>3</sub>)** δ 7.62 (d, *J* = 8.1 Hz, 1H), 7.56-7.50 (m, 2H), 7.38 (t, *J* = 7.4 Hz, 2H), 7.34-7.29 (m, 1H), 7.16 (dd, *J*<sub>1</sub> = 8.1, *J*<sub>2</sub> = 1.9 Hz, 1H), 7.09 (d, *J* = 1.8 Hz, 1H), 3.37 (s, 3H), 3.37 (d, *J* = 13.5 Hz, 1H), 2.91 (d, *J* = 13.6 Hz, 1H), 1.37 (s, 3H).

**<sup>13</sup>C NMR (125 MHz, CDCl<sub>3</sub>)** δ 173.81, 142.80, 139.22, 135.93, 134.34, 134.20, 128.68, 128.63, 126.62, 125.88, 122.59, 120.23, 116.13, 42.93, 39.74, 30.21, 21.82.

**HRMS(ESI)** Calculated for C<sub>19</sub>H<sub>17</sub>ClNO<sup>+</sup> ([M+H]<sup>+</sup>): 310.09204, found: 310.09932.

**6,7-dichloro-2a,4-dimethyl-1-phenyl-2,4-dihydrocyclobuta[c]quinolin-3(2aH)-one (2f)**

Yield: 82% (112.5 mg), white solid, mp: 182-184 °C.

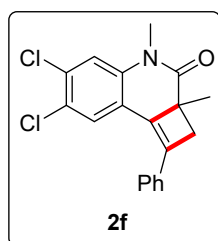

**<sup>1</sup>H NMR (500 MHz, CDCl<sub>3</sub>)** δ 7.70 (s, 1H), 7.51-7.47 (m, 2H), 7.42-7.36 (m, 2H), 7.36-7.31 (m, 1H), 7.16 (s, 1H), 3.35 (d, *J* = 13.7 Hz, 1H), 3.35 (s, 3H), 2.90 (d, *J* = 13.7 Hz, 1H), 1.35 (s, 3H).

**<sup>13</sup>C NMR (125 MHz, CDCl<sub>3</sub>)** δ 173.45, 141.13, 140.59, 134.51, 134.02, 132.06, 129.04, 128.75, 126.74, 126.07, 126.00, 121.63,

117.57, 42.91, 39.87, 30.33, 21.77.

**HRMS(ESI)** Calculated for C<sub>19</sub>H<sub>16</sub>Cl<sub>2</sub>NO<sup>+</sup> ([M+H]<sup>+</sup>): 343.05307, found: 344.06035.

### 1-(4-ethylphenyl)-2a,4-dimethyl-2,4-dihydrocyclobuta[c]quinolin-3(2aH)-one (2g)

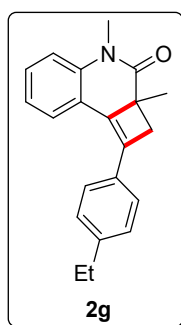

Yield: 91% (110.4 mg), white solid, mp: 52-53 °C.

**<sup>1</sup>H NMR (500 MHz, CDCl<sub>3</sub>)** <sup>1</sup>H NMR (500 MHz, CDCl<sub>3</sub>) δ 7.70 (dd, *J*<sub>1</sub> = 7.5, *J*<sub>2</sub> = 1.4 Hz, 1H), 7.50 (d, *J* = 8.2 Hz, 2H), 7.42-7.31 (m, 1H), 7.26-7.13 (m, 3H), 7.10 (d, *J* = 8.2 Hz, 1H), 3.40 (s, 3H), 3.37 (d, *J* = 13.4 Hz, 1H), 2.91 (d, *J* = 13.4 Hz, 1H), 2.67 (q, *J* = 7.6 Hz, 2H), 1.38 (s, 3H), 1.25 (t, *J* = 7.6 Hz, 3H).

**<sup>13</sup>C NMR (125 MHz, CDCl<sub>3</sub>)** δ 174.16, 144.93, 141.63, 138.59, 136.08, 132.18, 128.52, 128.08, 125.93, 125.77, 122.68, 122.07, 115.69, 42.96, 39.64, 30.14, 28.83, 21.85, 15.55.

**HRMS(ESI)** Calculated for C<sub>21</sub>H<sub>22</sub>NO<sup>+</sup> ([M+H]<sup>+</sup>): 304.16231, found: 304.16959

### 1-([1,1'-biphenyl]-4-yl)-2a,4-dimethyl-2,4-dihydrocyclobuta[c]quinolin-3(2aH)-one (2h)

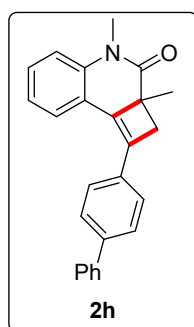

Yield: 78% (109.6 mg), white solid, mp: 181-183 °C.

**<sup>1</sup>H NMR (500 MHz, CDCl<sub>3</sub>)** δ 7.75 (d, *J* = 6.8 Hz, 1H), 7.63 (d, *J* = 7.8 Hz, 6H), 7.47 (t, *J* = 6.6 Hz, 2H), 7.38 (t, *J* = 6.2 Hz, 2H), 7.22 (t, *J* = 6.8 Hz, 1H), 7.13 (d, *J* = 7.8 Hz, 1H), 3.42 (s, 4H, overlap), 2.96 (d, *J* = 13.3 Hz, 1H), 1.42 (s, 3H).

**<sup>13</sup>C NMR (125 MHz, CDCl<sub>3</sub>)** δ 174.04, 141.72, 141.08, 140.50,

138.13, 137.48, 133.58, 128.89, 128.79, 127.57, 127.22, 126.97, 126.35, 125.82, 122.78, 121.95, 115.79, 43.20, 39.66, 30.18, 21.90.

**HRMS(ESI)** Calculated for  $C_{25}H_{22}NO^+$  ( $[M+H]^+$ ): 352.16231, found: 352.16959.

**1-(4-methoxyphenyl)-2a,4-dimethyl-2,4-dihydrocyclobuta[*c*]quinolin-3(2*aH*)-one (2i)**

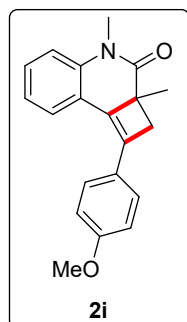

Yield: 97% (118.4 mg), white solid, mp: 127-129 °C.

**$^1H$  NMR (500 MHz,  $CDCl_3$ )**  $\delta$  7.56 (dd,  $J_1 = 7.5$ ,  $J_2 = 1.4$  Hz, 1H), 7.45-7.37 (m, 2H), 7.27-7.19 (m, 1H), 7.08-7.01 (m, 1H), 6.98 (d,  $J = 8.2$  Hz, 1H), 6.84-6.73 (m, 2H), 3.71 (s, 3H), 3.28 (s, 3H), 3.23 (d,  $J = 13.4$  Hz, 1H), 2.77 (d,  $J = 13.4$  Hz, 1H), 1.25 (s, 3H).

**$^{13}C$  NMR (125 MHz,  $CDCl_3$ )**  $\delta$  174.17, 159.84, 141.58, 138.20, 134.37, 128.36, 127.71, 127.33, 125.58, 122.66, 122.16, 115.69, 113.99, 55.31, 42.81, 39.65, 30.14, 21.82.

**HRMS(ESI)** Calculated for  $C_{20}H_{20}NO_2^+$  ( $[M+H]^+$ ): 306.14158, found: 306.14886.

**2a,4-dimethyl-1-(4-(methylthio)phenyl)-2,4-dihydrocyclobuta[*c*]quinolin-3(2*aH*)-one (2j)**

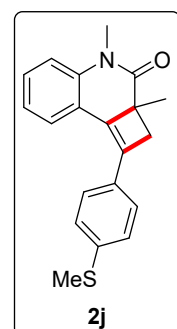

Yield: 86% (110.5 mg), white solid, mp: 145-147 °C.

**$^1H$  NMR (500 MHz,  $CDCl_3$ )**  $\delta$  7.66 (dd,  $J = 7.4$ , 1.2 Hz, 1H), 7.47 (d,  $J = 8.4$  Hz, 2H), 7.38-7.32 (m, 1H), 7.23 (d,  $J = 8.4$  Hz, 2H), 7.17 (t,  $J = 7.2$  Hz, 1H), 7.10 (d,  $J = 8.2$  Hz, 1H), 3.39 (s, 3H), 3.34 (d,  $J = 13.4$  Hz, 1H), 2.88 (d,  $J = 13.4$  Hz, 1H), 2.50 (s, 3H), 1.36 (s, 3H).

**$^{13}C$  NMR (125 MHz,  $CDCl_3$ )**  $\delta$  174.03, 141.62, 139.18, 137.92, 136.52, 131.41, 128.63, 126.20, 125.71, 122.70, 121.95, 115.73, 43.04, 39.54, 30.15, 21.81, 15.57.

**HRMS(ESI)** Calculated for  $C_{20}H_{20}NOS^+$  ( $[M+H]^+$ ): 322.11873, found: 322.12601.

**Tert-butyl(4-(2a,4-dimethyl-3-oxo-2,2a,3,4-tetrahydrocyclobuta[*c*]quinolin-1-yl)**

### phenyl)carbamate (2k)

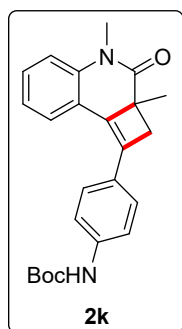

Yield: 83% (129.5 mg), white solid, mp: 175-177 °C.

**<sup>1</sup>H NMR (500 MHz, CDCl<sub>3</sub>)** δ 7.65 (dd,  $J_1 = 7.5$ ,  $J_2 = 1.4$  Hz, 1H), 7.52-7.45 (m, 2H), 7.39 (d,  $J = 8.4$  Hz, 2H), 7.36-7.31 (m, 1H), 7.21-7.13 (m, 1H), 7.09 (d,  $J = 8.1$  Hz, 1H), 6.79 (s, 1H), 3.39 (s, 3H), 3.33 (d,  $J = 13.4$  Hz, 1H), 2.87 (d,  $J = 13.4$  Hz, 1H), 1.52 (s, 9H), 1.35 (s, 3H).

**<sup>13</sup>C NMR (125 MHz, CDCl<sub>3</sub>)** δ 174.17, 152.52, 141.57, 138.69, 138.10, 135.31, 129.51, 128.46, 126.68, 125.63, 122.70, 122.06, 118.22, 115.70, 80.72, 42.90, 39.58, 30.15, 28.34, 21.80.

**HRMS(ESI)** Calculated for C<sub>24</sub>H<sub>27</sub>N<sub>2</sub>O<sub>3</sub><sup>+</sup> ([M+H]<sup>+</sup>): 391.19434, found: 391.20162.

### 1-(4-(dimethylamino)phenyl)-2a,4-dimethyl-2,4-dihydrocyclobuta[c]quinolin-3(2aH)-one (2l)

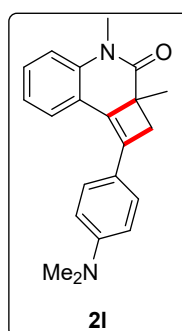

yield: 87% (110.7 mg), white solid, mp: 130-131 °C.

**<sup>1</sup>H NMR (500 MHz, CDCl<sub>3</sub>)** δ 7.68 (dd,  $J_1 = 7.5$ ,  $J_2 = 1.3$  Hz, 1H), 7.47 (d,  $J = 8.8$  Hz, 2H), 7.38-7.28 (m, 1H), 7.20-7.11 (m, 1H), 7.08 (d,  $J = 8.2$  Hz, 1H), 6.71 (d,  $J = 7.4$  Hz, 2H), 3.39 (s, 3H), 3.33 (d,  $J = 13.4$  Hz, 1H), 3.00 (s, 6H), 2.87 (d,  $J = 13.4$  Hz, 1H), 1.34 (s, 3H).

**<sup>13</sup>C NMR (125 MHz, CDCl<sub>3</sub>)** δ 174.44, 150.41, 141.46, 138.96, 127.79, 127.15, 126.64, 125.54, 123.31, 122.68, 122.54, 115.58, 111.94, 42.61, 40.34, 39.59, 30.14, 21.93.

**HRMS(ESI)** Calculated for C<sub>21</sub>H<sub>23</sub>N<sub>2</sub>O<sup>+</sup> ([M+H]<sup>+</sup>): 319.17321, found: 319.18049.

### 1-(4-chlorophenyl)-2a,4-dimethyl-2,4-dihydrocyclobuta[c]quinolin-3(2aH)-one (2m)

Yield: 68% (84.1 mg), white solid, mp: 100-102 °C.

**<sup>1</sup>H NMR (500 MHz, CDCl<sub>3</sub>)** δ 7.70 (dd,  $J_1 = 7.5$ ,  $J_2 = 1.4$  Hz, 1H), 7.59-7.53 (m, 2H), 7.42-7.34 (m, 2H), 7.34-7.28 (m, 1H), 7.22-7.16 (m, 1H), 7.11 (d,  $J = 8.2$  Hz, 1H),

3.40 (s, 3H), 3.37 (d,  $J = 13.5$  Hz, 1H), 2.91 (d,  $J = 13.4$  Hz, 1H), 1.38 (s, 3H).

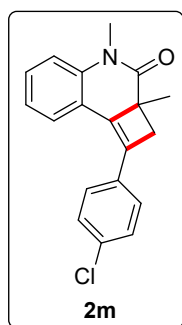

$^{13}\text{C}$  NMR (125 MHz,  $\text{CDCl}_3$ )  $\delta$  174.09, 141.67, 138.48, 137.27, 134.56, 128.71, 128.55, 128.45, 125.84, 125.80, 122.72, 121.91, 115.72, 43.04, 39.60, 30.15, 21.80.

HRMS(ESI) Calculated for  $\text{C}_{19}\text{H}_{17}\text{ClNO}^+$  ( $[\text{M}+\text{H}]^+$ ): 310.09204, found: 310.09932.

#### 4-(2a,4-dimethyl-3-oxo-2,2a,3,4-tetrahydrocyclobuta[c]quinolin-1-yl)benzoyl nitrile

(2n)

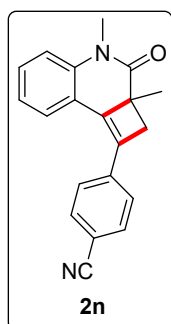

Yield: 90% (108.0 mg), white solid, mp: 155-156 °C.

$^1\text{H}$  NMR (500 MHz,  $\text{CDCl}_3$ )  $\delta$  7.68-7.57 (m, 5H), 7.46-7.36 (m, 1H), 7.23-7.18 (m, 1H), 7.13 (d,  $J = 8.2$  Hz, 1H), 3.39 (s, 3H), 3.35 (d,  $J = 13.4$  Hz, 1H), 2.91 (d,  $J = 13.4$  Hz, 1H), 1.39 (s, 3H).

$^{13}\text{C}$  NMR (125 MHz,  $\text{CDCl}_3$ )  $\delta$  173.47, 142.30, 141.80, 138.43, 136.21, 132.39, 129.69, 126.13, 125.73, 122.95, 121.08, 118.84, 115.99, 111.26, 43.70, 39.39, 30.19, 21.79.

HRMS(ESI) Calculated for  $\text{C}_{20}\text{H}_{17}\text{N}_2\text{O}^+$  ( $[\text{M}+\text{H}]^+$ ): 301.12626, found: 301.13354.

#### 2a,4-dimethyl-1-(4-(trifluoromethyl)phenyl)-2,4-dihydrocyclobuta[c]quinolin-

3(2aH)-one (2o)

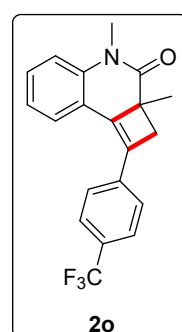

Yield: 95% (130.4 mg), white solid, mp: 98-100 °C.

$^1\text{H}$  NMR (500 MHz,  $\text{CDCl}_3$ )  $\delta$  7.67 (dd,  $J_1 = 7.5$ ,  $J_2 = 1.3$  Hz, 1H), 7.66-7.60 (m, 4H), 7.45-7.37 (m, 1H), 7.24-7.18 (m, 1H), 7.13 (d,  $J = 8.2$  Hz, 1H), 3.40 (s, 3H), 3.38 (d,  $J = 13.5$  Hz, 1H), 2.93 (d,  $J = 13.4$  Hz, 1H), 1.40 (s, 3H).

$^{13}\text{C}$  NMR (125 MHz,  $\text{CDCl}_3$ )  $\delta$  173.70, 141.78, 140.53, 137.67, 136.75, 129.87 (d,  $^2J_{\text{C-F}} = 32.5$  Hz), 129.35, 125.92, 125.71, 125.53 (q,  $^3J_{\text{C-F}} = 3.8$  Hz), 124.04 (d,  $^1J_{\text{C-F}} = 272.0$  Hz), 122.86, 121.32, 115.90, 43.48, 39.53, 30.17, 21.78.

HRMS(ESI) Calculated for  $\text{C}_{20}\text{H}_{17}\text{F}_3\text{NO}^+$  ( $[\text{M}+\text{H}]^+$ ): 344.11840, found: 344.12568.



**Methyl 4-(2a,4-dimethyl-3-oxo-2,2a,3,4-tetrahydrocyclobuta[c]quinolin-1-yl)benzoate (2p)**

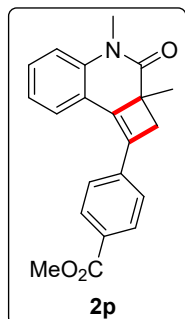

yield: 95% (126.6 mg), white solid, mp: 158-160 °C.

**<sup>1</sup>H NMR (500 MHz, CDCl<sub>3</sub>)** δ 8.03 (d, *J* = 8.4 Hz, 2H), 7.69 (dd, *J* = 7.5, 1.3 Hz, 1H), 7.60 (d, *J* = 8.4 Hz, 2H), 7.41-7.36 (m, 1H), 7.22-7.17 (m, 1H), 7.12 (d, *J* = 8.2 Hz, 1H), 3.92 (s, 3H), 3.38 (d, *J* = 15.6 Hz, 4H), 2.92 (d, *J* = 13.4 Hz, 1H), 1.39 (s, 3H).

**<sup>13</sup>C NMR (125 MHz, CDCl<sub>3</sub>)** δ 173.70, 166.66, 141.78, 140.63, 138.56, 137.26, 129.88, 129.49, 129.28, 125.80, 125.62, 122.84, 121.46, 115.84, 52.14, 43.50, 39.55, 30.15, 21.79.

**HRMS(ESI)** Calculated for C<sub>21</sub>H<sub>20</sub>NO<sub>3</sub><sup>+</sup> ([M+H]<sup>+</sup>): 334.13649, found: 334.14377.

**1-(2-methoxyphenyl)-2a,4-dimethyl-2,4-dihydrocyclobuta[c]quinolin-3(2aH)-one (2q)**

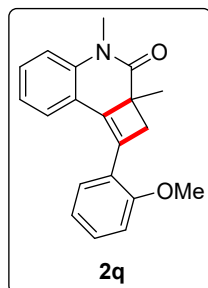

Yield: 93% (113.5 mg), light yellow oil.

**<sup>1</sup>H NMR (500 MHz, CDCl<sub>3</sub>)** δ 7.59-7.47 (m, 2H), 7.37-7.24 (m, 2H), 7.16-7.11 (m, 1H), 7.07 (d, *J* = 8.2 Hz, 1H), 6.99-6.93 (m, 1H), 6.89 (d, *J* = 8.2 Hz, 1H), 3.77 (s, 3H), 3.42 (d, *J* = 13.7 Hz, 1H), 3.40 (s, 3H), 3.03 (d, *J* = 13.7 Hz, 1H), 1.35 (s, 3H).

**<sup>13</sup>C NMR (125 MHz, CDCl<sub>3</sub>)** δ 174.39, 157.28, 141.72, 137.62, 135.23, 129.63, 128.33, 128.17, 127.40, 123.79, 122.94, 122.17, 120.35, 115.29, 110.79, 54.68, 43.69, 41.68, 30.15, 21.73.

**HRMS(ESI)** Calculated for C<sub>20</sub>H<sub>20</sub>NO<sub>2</sub><sup>+</sup> ([M+H]<sup>+</sup>): 306.14158, found: 306.14886.

**1-(2-chlorophenyl)-2a,4-dimethyl-2,4-dihydrocyclobuta[c]quinolin-3(2aH)-one (2r)**

Yield: 75% (92.7 mg), light yellow oil.

**<sup>1</sup>H NMR (500 MHz, CDCl<sub>3</sub>)** δ 7.74-7.64 (m, 1H), 7.59-7.48 (m, 1H), 7.43-7.32 (m,

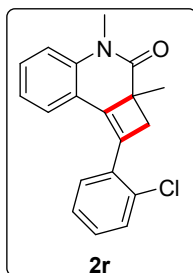

2H), 7.24-7.15 (m, 2H), 7.15-7.05 (m, 2H), 3.58 (d,  $J = 13.9$  Hz, 1H), 3.41 (s, 3H), 3.23 (d,  $J = 13.9$  Hz, 1H), 1.40 (s, 3H).

$^{13}\text{C}$  NMR (125 MHz,  $\text{CDCl}_3$ )  $\delta$  173.89, 141.75, 141.03, 136.84, 133.09, 132.68, 130.57, 129.16, 129.01, 128.77, 126.44, 125.76, 122.60, 121.42, 115.69, 44.48, 43.88, 30.12, 22.02.

HRMS(ESI) Calculated for  $\text{C}_{19}\text{H}_{17}\text{ClNO}^+$  ( $[\text{M}+\text{H}]^+$ ): 310.09204, found: 310.09932.

**1-(3-methoxyphenyl)-2a,4-dimethyl-2,4-dihydrocyclobuta[c]quinolin-3(2aH)-one (2s)**

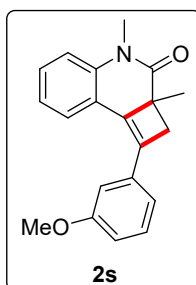

Yield: 92% (112.3 mg), light yellow oil.

$^1\text{H}$  NMR (500 MHz,  $\text{CDCl}_3$ )  $\delta$  7.59 (dd,  $J_1 = 7.5$ ,  $J_2 = 1.4$  Hz, 1H), 7.29-7.22 (m, 1H), 7.21-7.15 (m, 1H), 7.09-7.04 (m, 2H), 7.01-6.97 (m, 2H), 6.75 (dd,  $J = 8.2$ , 2.0 Hz, 1H), 3.72 (s, 3H), 3.29 (s, 3H), 3.25 (d,  $J = 13.4$  Hz, 1H), 2.79 (d,  $J = 13.4$  Hz, 1H), 1.27 (s, 3H).

$^{13}\text{C}$  NMR (125 MHz,  $\text{CDCl}_3$ )  $\delta$  174.00, 159.71, 141.71, 138.36, 137.66, 135.88, 129.61, 128.78, 125.76, 122.72, 121.83, 118.47, 115.76, 114.15, 111.20, 55.26, 43.03, 39.68, 30.14, 21.79.

HRMS(ESI) Calculated for  $\text{C}_{20}\text{H}_{20}\text{NO}_2^+$  ( $[\text{M}+\text{H}]^+$ ): 306.14158, found: 306.14886.

**2a,4-dimethyl-1-(naphthalen-2-yl)-2,4-dihydrocyclobuta[c]quinolin-3(2aH)-one (2t)**

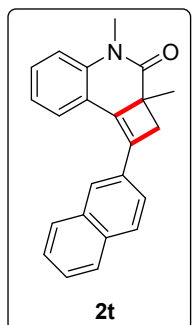

Yield: 94% (122.2 mg), white solid, mp: 128-130 °C.

$^1\text{H}$  NMR (500 MHz,  $\text{CDCl}_3$ )  $\delta$  7.90-7.85 (m, 2H), 7.85-7.77 (m, 4H), 7.56-7.45 (m, 2H), 7.44-7.34 (m, 1H), 7.23 (t,  $J = 7.2$  Hz, 1H), 7.13 (d,  $J = 8.2$  Hz, 1H), 3.48 (d,  $J = 13.3$  Hz, 1H), 3.42 (s, 3H), 3.04 (d,  $J = 13.3$  Hz, 1H), 1.43 (s, 3H).

$^{13}\text{C}$  NMR (125 MHz,  $\text{CDCl}_3$ )  $\delta$  174.06, 141.76, 138.47, 137.80, 133.35, 133.22, 132.18, 128.80, 128.31, 128.18, 127.77, 126.50, 126.40, 125.80, 125.19, 123.60, 122.79, 122.02, 115.80, 43.17, 39.68, 30.19, 21.86.

**HRMS(ESI)** Calculated for  $C_{23}H_{20}NO^+$  ( $[M+H]^+$ ): 326.14666, found: 326.15394.

**2a,4-dimethyl-1-(thiophen-3-yl)-2,4-dihydrocyclobuta[c]quinolin-3(2aH)-one (2u)**

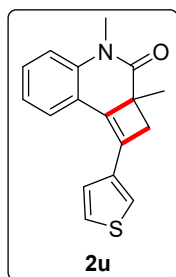

Yield : 95% (106.8 mg), white solid, mp: 103-104 °C.

**$^1H$  NMR (500 MHz,  $CDCl_3$ )**  $\delta$  7.60 (dd,  $J_1 = 7.4$ ,  $J_2 = 1.2$  Hz, 1H), 7.40-7.30 (m, 4H), 7.16 (t,  $J = 7.3$  Hz, 1H), 7.08 (d,  $J = 8.2$  Hz, 1H), 3.39 (s, 3H), 3.36 (d,  $J = 13.4$  Hz, 1H), 2.88 (d,  $J = 13.4$  Hz, 1H), 1.38 (s, 3H).

**$^{13}C$  NMR (125 MHz,  $CDCl_3$ )**  $\delta$  173.94, 141.62, 136.88, 134.91, 133.52, 128.57, 126.28, 125.57, 125.35, 122.96, 122.75, 121.72, 115.68, 43.67, 40.31, 30.13, 21.94.

**HRMS(ESI)** Calculated for  $C_{17}H_{16}NOS^+$  ( $[M+H]^+$ ): 282.08743, found: 282.09471.

**1-(cyclohex-1-en-1-yl)-2a,4-dimethyl-2,4-dihydrocyclobuta[c]quinolin-3(2aH)-one (2v)**

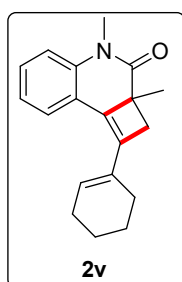

Yield: 97% (108.3 mg), white solid, mp: 109-110 °C.

**$^1H$  NMR (500 MHz,  $CDCl_3$ )**  $\delta$  7.50-7.39 (m, 1H), 7.30-7.20 (m, 1H), 7.14-6.99 (m, 2H), 5.87 (t,  $J = 4.0$  Hz, 1H), 3.35 (s, 3H), 3.09 (d,  $J = 13.3$  Hz, 1H), 2.61 (d,  $J = 13.3$  Hz, 1H), 2.49-2.38 (m, 1H), 2.31-2.23 (m, 1H), 2.17 (d,  $J = 1.7$  Hz, 2H), 1.82-1.71 (m, 1H), 1.72-1.61 (m, 1H), 1.61-1.51 (m, 2H), 1.25 (s, 3H).

**$^{13}C$  NMR (125 MHz,  $CDCl_3$ )**  $\delta$  174.38, 141.54, 140.96, 133.99, 133.73, 128.87, 127.95, 126.24, 122.45, 122.26, 115.47, 42.16, 38.79, 30.11, 26.88, 25.71, 22.36, 21.88, 21.60.

**HRMS(ESI)** Calculated for  $C_{19}H_{22}NO^+$  ( $[M+H]^+$ ): 280.16231, found: 280.16959.

**1-butyl-4-methyl-2,4-dihydrocyclobuta[c]quinolin-3(2aH)-one (2w)**

yield: 92% (93.9 mg), light yellow oil.

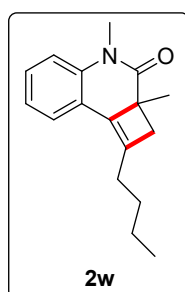

**$^1H$  NMR (500 MHz,  $CDCl_3$ )**  $\delta$  7.30-7.23 (m, 2H), 7.07-7.01 (m, 2H), 3.35 (s, 3H), 3.01 (d,  $J = 13.8$  Hz, 1H), 2.53 (d,  $J = 13.8$  Hz,

1H), 2.26 (t,  $J = 7.5$  Hz, 2H), 1.50 (dt,  $J_1 = 12.5$ ,  $J_2 = 7.0$  Hz, 2H), 1.34 (dd,  $J_1 = 15.0$ ,  $J_2 = 7.6$  Hz, 2H), 1.26 (s, 3H), 0.91 (t,  $J = 7.3$  Hz, 3H).

$^{13}\text{C}$  NMR (125 MHz,  $\text{CDCl}_3$ )  $\delta$  174.54, 144.00, 141.33, 137.12, 127.80, 125.00, 122.48, 121.48, 115.34, 43.06, 41.97, 29.98, 29.49, 22.59, 21.97, 13.84.

HRMS(ESI) Calculated for  $\text{C}_{17}\text{H}_{22}\text{NO}^+$  ( $[\text{M}+\text{H}]^+$ ): 256.16231, found: 256.16959.

#### 1-cyclopropyl-2a,4-dimethyl-2,4-dihydrocyclobuta[*c*]quinolin-3(2*aH*)-one (2x)

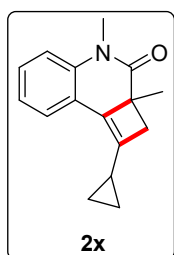

Yield: 91% (87.0 mg), white solid, mp: 55-56 °C.

$^1\text{H}$  NMR (500 MHz,  $\text{CDCl}_3$ )  $\delta$  7.44-7.28 (m, 1H), 7.31-7.23 (m, 1H), 7.15-6.95 (m, 2H), 3.36 (s, 3H), 2.81 (d,  $J = 13.5$  Hz, 1H), 2.32 (d,  $J = 13.5$  Hz, 1H), 1.79-1.60 (m, 1H), 1.25 (s, 3H), 0.89-0.80 (m, 1H), 0.80-0.69 (m, 2H), 0.65-0.54 (m, 1H).

$^{13}\text{C}$  NMR (125 MHz,  $\text{CDCl}_3$ )  $\delta$  174.34, 144.52, 141.07, 135.18, 127.64, 124.90, 122.58, 121.56, 115.42, 41.92, 38.77, 30.04, 21.91, 11.35, 6.78, 5.37.

HRMS(ESI) Calculated for  $\text{C}_{16}\text{H}_{18}\text{NO}^+$  ( $[\text{M}+\text{H}]^+$ ): 240.13101, found: 240.13829.

#### 4-methyl-1-phenyl-2,4-dihydrocyclobuta[*c*]quinolin-3(2*aH*)-one (2y)

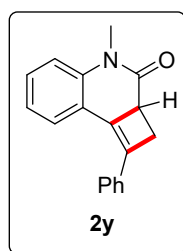

yield: 94% (98.2 mg), light yellow oil.

$^1\text{H}$  NMR (500 MHz,  $\text{CDCl}_3$ )  $\delta$  7.54-7.51 (m, 1H), 7.45 (dd,  $J_1 = 8.0$ ,  $J_2 = 1.3$  Hz, 1H), 7.41-7.37 (m, 3H), 7.33-7.30 (m, 3H), 7.09-7.06 (m, 1H), 6.77 (s, 1H), 5.94 (d,  $J = 0.6$  Hz, 1H), 5.45 (s, 1H), 3.79 (s, 3H).

$^{13}\text{C}$  NMR (125 MHz,  $\text{CDCl}_3$ )  $\delta$  162.17, 150.82, 145.52, 140.09, 138.77, 130.53, 128.69, 128.34, 127.92, 126.31, 121.95, 121.84, 120.26, 116.87, 114.35, 29.46.

HRMS(ESI) Calculated for  $\text{C}_{18}\text{H}_{16}\text{NO}^+$  ( $[\text{M}+\text{H}]^+$ ): 262.11536, found: 262.12264.

#### 4-methyl-1,2a-diphenyl-2,4-dihydrocyclobuta[*c*]quinolin-3(2*aH*)-one (2z)

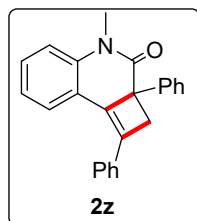

yield: 81% (109.2 mg), white solid, mp: 160-161 °C.

$^1\text{H}$  NMR (500 MHz,  $\text{CDCl}_3$ )  $\delta$  7.83 (dd,  $J = 7.5$ , 1.3 Hz, 1H), 7.66-

7.62 (m, 2H), 7.43-7.38 (m, 4H), 7.36-7.31 (m, 2H), 7.27-7.18 (m, 4H), 7.03 (d,  $J = 8.2$  Hz, 1H), 3.79 (d,  $J = 13.4$  Hz, 1H), 3.41 (s, 3H), 3.14 (d,  $J = 13.4$  Hz, 1H).

$^{13}\text{C}$  NMR (125 MHz,  $\text{CDCl}_3$ )  $\delta$  171.51, 141.74, 141.08, 140.02, 134.66, 134.19, 128.84, 128.81, 128.63, 128.49, 127.21, 126.11, 126.04, 125.42, 123.03, 122.84, 115.97, 49.73, 42.70, 30.50.

HRMS(ESI) Calculated for  $\text{C}_{24}\text{H}_{20}\text{NO}^+$  ( $[\text{M}+\text{H}]^+$ ): 338.14666, found: 338.15394.

#### 4-(methoxymethyl)-2a-methyl-1-phenyl-2,4-dihydrocyclobuta[*c*]quinolin-3(2*aH*)-one (2A)

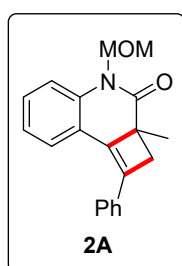

yield: 95% (116.0 mg), white solid, mp: 110-111 °C.

$^1\text{H}$  NMR (500 MHz,  $\text{CDCl}_3$ )  $\delta$  7.72 (dd,  $J_1 = 7.5$ ,  $J_2 = 1.4$  Hz, 1H), 7.61-7.57 (m, 2H), 7.45 (d,  $J = 8.1$  Hz, 1H), 7.42-7.35 (m, 3H), 7.35-7.29 (m, 1H), 7.26-7.17 (m, 1H), 5.84 (d,  $J = 10.7$  Hz, 1H), 4.89 (d,  $J = 10.7$  Hz, 1H), 3.43 (s, 3H), 3.39 (d,  $J = 13.5$  Hz, 1H), 2.94 (d,  $J = 13.5$  Hz, 1H), 1.45 (s, 3H).

$^{13}\text{C}$  NMR (125 MHz,  $\text{CDCl}_3$ )  $\delta$  174.89, 140.96, 138.49, 136.82, 134.49, 129.02, 128.60, 128.57, 125.90, 125.67, 123.42, 121.62, 116.72, 74.34, 56.00, 43.05, 39.45, 21.68.

HRMS(ESI) Calculated for  $\text{C}_{20}\text{H}_{19}\text{NO}_2\text{Na}^+$  ( $[\text{M}+\text{Na}]^+$ ): 328.14158, found: 328.13080.

#### 4-ethyl-2a-methyl-1-phenyl-2,4-dihydrocyclobuta[*c*]quinolin-3(2*aH*)-one (2B)

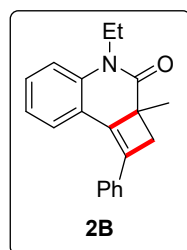

yield: 91% (105.2 mg), white solid, mp: 103-104 °C.

$^1\text{H}$  NMR (500 MHz,  $\text{CDCl}_3$ )  $\delta$  7.72 (dd,  $J = 7.5$ , 1.5 Hz, 1H), 7.60-7.57 (m, 2H), 7.41-7.34 (m, 3H), 7.33-7.29 (m, 1H), 7.21-7.15 (m, 1H), 7.12 (d,  $J = 8.3$  Hz, 1H), 4.19-4.11 (m, 1H), 3.94-3.86 (m, 1H), 3.39 (d,  $J = 13.5$  Hz, 1H), 2.91 (d,  $J = 13.5$  Hz, 1H), 1.37 (s, 3H), 1.26 (t,  $J = 7.1$  Hz, 3H).

$^{13}\text{C}$  NMR (125 MHz,  $\text{CDCl}_3$ )  $\delta$  173.57, 140.55, 138.34, 137.47, 134.65, 128.75, 128.55, 128.40, 126.08, 125.87, 122.49, 122.02, 115.46, 42.92, 39.45, 37.62, 21.65,

12.76.

**HRMS(ESI)** Calculated for  $C_{20}H_{20}NO^+$  ( $[M+H]^+$ ): 290.14666, found: 290.15394.

**4-benzyl-2a-methyl-1-phenyl-2,4-dihydrocyclobuta[*c*]quinolin-3(2*aH*)-one (2C)**

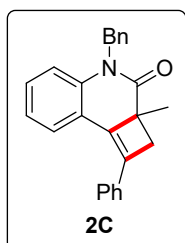

yield: 83% (116.6 mg), white solid, mp: 149-150 °C.

**$^1H$  NMR (500 MHz,  $CDCl_3$ )**  $\delta$  7.74 (dd,  $J_1 = 7.4$ ,  $J_2 = 1.5$  Hz, 1H), 7.65-7.62 (m, 2H), 7.44-7.40 (m, 2H), 7.37-7.33 (m, 3H), 7.29-7.24 (m, 3H), 7.23-7.20 (m, 1H), 7.17-7.13 (m, 1H), 7.01-6.98 (m, 1H), 5.69 (d,  $J = 16.4$  Hz, 1H), 4.75 (d,  $J = 16.4$  Hz, 1H), 3.50 (d,  $J = 13.5$  Hz,

1H), 3.00 (d,  $J = 13.5$  Hz, 1H), 1.55 (s, 3H).

**$^{13}C$  NMR (125 MHz,  $CDCl_3$ )**  $\delta$  174.23, 141.22, 138.62, 137.31, 137.19, 134.62, 128.84, 128.77, 128.63, 128.55, 127.07, 126.17, 125.96, 125.87, 122.86, 121.93, 116.52, 46.69, 43.13, 39.70, 22.01.

**HRMS(ESI)** Calculated for  $C_{25}H_{22}NO^+$  ( $[M+H]^+$ ): 352.16231, found: 352.16959.

**(3*Z*,5*E*)-1,3-dimethyl-5-phenylbenzo[*b*]azocin-2(1*H*)-one (3a)**

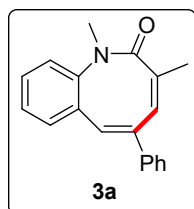

Yield: 98% (107.9 mg), white solid, mp: 122-124 °C.

**$^1H$  NMR (500 MHz,  $CDCl_3$ )**  $\delta$  7.58-7.56 (m, 1H), 7.52-7.48 (m, 1H), 7.41-7.37 (m, 3H), 7.33-7.29 (m, 3H), 7.14-7.10 (m, 1H), 6.16 (s, 1H), 5.25 (s, 1H), 3.84 (s, 3H), 2.19 (s, 3H).

**$^{13}C$  NMR (125 MHz,  $CDCl_3$ )**  $\delta$  162.73, 146.28, 143.88, 138.76, 137.98, 129.38, 128.75, 128.31, 127.75, 127.40, 125.81, 122.01, 120.91, 115.88, 113.92, 29.92, 15.04.

**HRMS(ESI)** Calculated for  $C_{19}H_{18}NO^+$  ( $[M+H]^+$ ): 276.13101, found: 276.13829.

**(3*Z*,5*E*)-1,3,8-trimethyl-5-phenylbenzo[*b*]azocin-2(1*H*)-one (3b)**

Yield: 93% (107.6 mg), colorless oil.

**$^1H$  NMR (500 MHz,  $CDCl_3$ )**  $\delta$  7.40-7.35 (m, 3H), 7.34-7.28 (m, 5H), 6.15 (s, 1H), 5.23 (s, 1H), 3.82 (s, 3H), 2.31 (s, 3H), 2.16 (s, 3H).

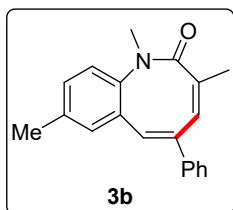

$^{13}\text{C}$  NMR (125 MHz,  $\text{CDCl}_3$ )  $\delta$  162.59, 146.08, 143.91, 138.04, 136.80, 131.44, 130.62, 128.74, 128.25, 127.60, 127.09, 125.82, 120.87, 115.73, 113.85, 29.91, 20.79, 15.04.

HRMS(ESI) Calculated for  $\text{C}_{20}\text{H}_{20}\text{NO}^+$  ( $[\text{M}+\text{H}]^+$ ): 290.14666, found: 290.15394.

**Methyl(3Z,5E)-1,3-dimethyl-2-oxo-5-phenyl-1,2-dihydrobenzo[b]azocine-8-carboxylate (3c)**

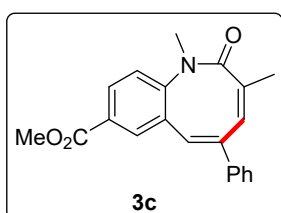

Yield: 84% (111.9 mg), white solid, mp: 120-122 °C.

$^1\text{H}$  NMR (500 MHz,  $\text{CDCl}_3$ )  $\delta$  8.27 (d,  $J = 1.9$  Hz, 1H), 8.17-8.11 (m, 1H), 7.42 (d,  $J = 8.9$  Hz, 1H), 7.38-7.28 (m, 5H), 6.19 (s, 1H), 5.27 (s, 1H), 3.86 (s, 3H), 3.84 (s, 3H),

2.17 (s, 3H).

$^{13}\text{C}$  NMR (125 MHz,  $\text{CDCl}_3$ )  $\delta$  166.41, 162.76, 146.45, 143.31, 141.76, 137.90, 130.25, 129.43, 128.82, 128.55, 128.43, 125.84, 123.85, 120.53, 116.53, 113.96, 52.08, 30.20, 15.06.

HRMS(ESI) Calculated for  $\text{C}_{21}\text{H}_{20}\text{NO}_3^+$  ( $[\text{M}+\text{H}]^+$ ): 334.13649, found: 334.14377.

**(3Z,5E)-1,3-dimethyl-2-oxo-5-phenyl-1,2-dihydrobenzo[b]azocine-8-carbonitrile (3d)**

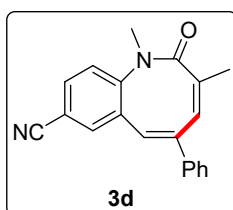

Yield: 92% (110.4 mg), white solid, mp: 160-162 °C.

$^1\text{H}$  NMR (500 MHz,  $\text{CDCl}_3$ )  $\delta$  7.85 (d,  $J = 1.8$  Hz, 1H), 7.73-7.68 (m, 1H), 7.45 (d,  $J = 8.8$  Hz, 1H), 7.34-7.30 (m, 5H), 6.20 (s, 1H), 5.26 (s, 1H), 3.82 (s, 3H), 2.17 (s, 3H).

$^{13}\text{C}$  NMR (125 MHz,  $\text{CDCl}_3$ )  $\delta$  162.42, 145.31, 142.77, 141.34, 137.12, 131.98, 131.97, 129.99, 129.00, 128.78, 125.67, 121.12, 118.69, 116.74, 114.92, 105.50, 30.21, 15.15.

HRMS(ESI) Calculated for  $\text{C}_{20}\text{H}_{17}\text{N}_2\text{O}^+$  ( $[\text{M}+\text{H}]^+$ ): 301.12626, found: 301.13354.

**(3Z,5E)-1,3-dimethyl-5-(*p*-tolyl)benzo[*b*]azocin-2(1*H*)-one (3e)**

Yield: 94% (108.7 mg), colorless oil.

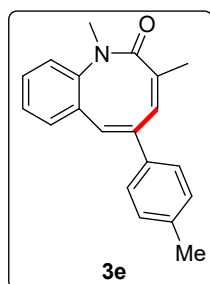

$^1\text{H NMR}$  (500 MHz,  $\text{CDCl}_3$ )  $\delta$  7.57 (d,  $J = 8.0$  Hz, 1H), 7.49 (t,  $J = 7.8$  Hz, 1H), 7.39 (d,  $J = 8.5$  Hz, 1H), 7.27 (d,  $J = 7.9$  Hz, 2H), 7.11 (m, 3H), 6.11 (s, 1H), 5.19 (s, 1H), 3.84 (d,  $J = 0.5$  Hz, 3H), 2.34 (s, 3H), 2.19 (s, 3H).

$^{13}\text{C NMR}$  (125 MHz,  $\text{CDCl}_3$ )  $\delta$  162.77, 146.50, 143.67, 138.73, 138.27, 135.13, 129.46, 129.35, 127.63, 127.45, 125.71, 122.01, 120.96, 114.85, 113.90, 29.91, 21.13, 15.03.

**HRMS(ESI)** Calculated for  $\text{C}_{20}\text{H}_{20}\text{NO}^+$  ( $[\text{M}+\text{H}]^+$ ): 290.14666, found: 290.15394.

**(3Z,5E)-5-([1,1'-biphenyl]-4-yl)-1,3-dimethylbenzo[*b*]azocin-2(1*H*)-one (3f)**

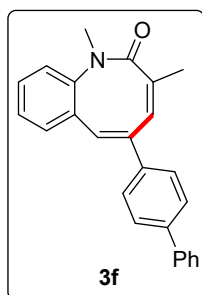

Yield: 97% (127.8 mg), white solid, mp: 133-135 °C.

$^1\text{H NMR}$  (500 MHz,  $\text{CDCl}_3$ )  $\delta$  7.62-7.57 (m, 3H), 7.56-7.50 (m, 3H), 7.47-7.40 (m, 5H), 7.38-7.33 (m, 1H), 7.17-7.12 (m, 1H), 6.22 (s, 1H), 5.28 (s, 1H), 3.86 (s, 3H), 2.23 (s, 3H).

$^{13}\text{C NMR}$  (125 MHz,  $\text{CDCl}_3$ )  $\delta$  162.74, 146.23, 143.45, 141.13, 140.38, 138.79, 136.84, 129.45, 128.82, 127.82, 127.51, 127.45, 127.42, 126.96, 126.25, 122.07, 120.92, 115.80, 113.98, 29.96, 15.12.

**HRMS(ESI)** Calculated for  $\text{C}_{25}\text{H}_{22}\text{NO}^+$  ( $[\text{M}+\text{H}]^+$ ): 352.16231, found: 352.16959.

**(3Z,5E)-5-(4-methoxyphenyl)-1,3-dimethylbenzo[*b*]azocin-2(1*H*)-one (3g)**

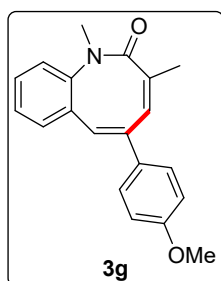

Yield: 96% (117.2 mg), colorless oil.

$^1\text{H NMR}$  (500 MHz,  $\text{CDCl}_3$ )  $\delta$  7.59-7.55 (m, 1H), 7.52-7.47 (m, 1H), 7.39 (d,  $J = 8.1$  Hz, 1H), 7.32-7.28 (m, 2H), 7.14-7.10 (m, 1H), 6.85-6.81 (m, 2H), 6.03 (s, 1H), 5.13 (s, 1H), 3.83 (s, 3H), 3.79 (s, 3H), 2.18 (s, 3H).



$^{13}\text{C}$  NMR (125 MHz,  $\text{CDCl}_3$ )  $\delta$  162.76, 159.73, 146.55, 143.21, 138.74, 130.57, 129.33, 127.58, 127.45, 127.09, 121.98, 120.92, 114.11, 113.88, 113.70, 55.25, 29.89, 14.98.

HRMS(ESI) Calculated for  $\text{C}_{20}\text{H}_{20}\text{NO}_2^+$  ( $[\text{M}+\text{H}]^+$ ): 306.14158, found: 306.14886.

**Tert-butyl(4-((3Z,5E)-1,3-dimethyl-2-oxo-1,2-dihydrobenzo[*b*]azocin-5-yl)phenyl)carbamate (3h)**

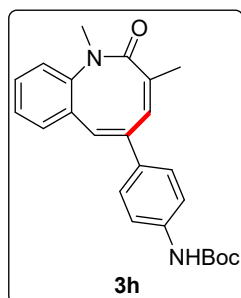

Yield: 89% (138.9 mg), white solid, mp: 204-206 °C.

$^1\text{H}$  NMR (500 MHz,  $\text{CDCl}_3$ )  $\delta$  7.56-7.52 (m, 1H), 7.50-7.45 (m, 1H), 7.39-7.32 (m, 3H), 7.29-7.26 (m, 2H), 7.11-7.08 (m, 1H), 7.02 (s, 1H), 6.06 (s, 1H), 5.14 (s, 1H), 3.82 (s, 3H), 2.17 (s, 3H), 1.49 (s, 9H).

$^{13}\text{C}$  NMR (125 MHz,  $\text{CDCl}_3$ )  $\delta$  162.77, 152.75, 146.46, 143.22, 138.79, 138.68, 132.48, 129.39, 127.58, 127.46, 126.46, 122.04, 120.89, 118.67, 114.34, 113.90, 80.53, 31.56, 29.94, 28.30, 22.62, 15.02, 14.09.

HRMS(ESI) Calculated for  $\text{C}_{24}\text{H}_{25}\text{N}_2\text{O}_3^+$  ( $[\text{M}+\text{H}]^+$ ): 389.19434, found: 389.18707.

**Methyl 4-((3Z,5E)-1,3-dimethyl-2-oxo-1,2-dihydrobenzo[*b*]azocin-5-yl)benzoate (3i)**

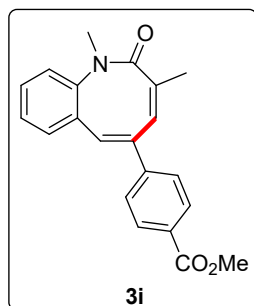

Yield: 88% (117.2 mg), colorless oil.

$^1\text{H}$  NMR (500 MHz,  $\text{CDCl}_3$ )  $\delta$  7.97 (d,  $J = 8.5$  Hz, 2H), 7.53-7.48 (m, 2H), 7.44-7.39 (m, 3H), 7.13-7.09 (m, 1H), 6.26 (s, 1H), 5.37 (s, 1H), 3.90 (s, 3H), 3.83 (s, 3H), 2.16 (s, 3H).

$^{13}\text{C}$  NMR (125 MHz,  $\text{CDCl}_3$ )  $\delta$  166.59, 162.58, 145.51, 143.16, 142.27, 138.79, 130.10, 129.87, 129.56, 127.97, 127.11, 125.76, 122.09, 120.64, 118.18, 114.05, 52.11, 29.95, 15.04.

HRMS(ESI) Calculated for  $\text{C}_{21}\text{H}_{20}\text{NO}_3^+$  ( $[\text{M}+\text{H}]^+$ ): 334.13649, found: 334.14377.

**(3Z,5E)-1,3-dimethyl-5-(naphthalen-2-yl)benzo[*b*]azocin-2(1H)-one (3j)**

Yield: 95% (123.56 mg), colorless oil.

**<sup>1</sup>H NMR (500 MHz, CDCl<sub>3</sub>)** δ 7.86-7.80 (m, 2H), 7.76-7.73 (m, 1H), 7.70-7.67 (m, 1H), 7.62-7.58 (m, 2H), 7.51-7.41 (m, 4H), 7.13-7.09 (m, 1H), 6.30 (s, 1H), 5.35 (s, 1H), 3.88 (s, 3H), 2.25 (s, 3H).

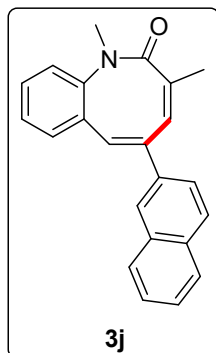

**<sup>13</sup>C NMR (126 MHz, CDCl<sub>3</sub>)** δ 162.83, 146.35, 143.84, 138.82, 135.12, 133.43, 133.18, 129.44, 128.57, 128.38, 127.89, 127.55, 127.46, 126.39, 125.54, 123.17, 122.09, 120.96, 116.33, 113.99, 29.99, 15.12.

**HRMS(ESI)** Calculated for C<sub>23</sub>H<sub>20</sub>NO<sup>+</sup> ([M+H]<sup>+</sup>): 326.14666, found: 326.15394.

**(3Z,5E)-1,3-dimethyl-5-(thiophen-3-yl)benzo[b]azocin-2(1H)-one (3k)**

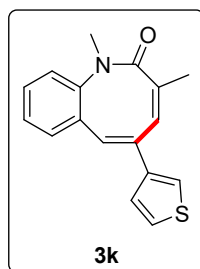

Yield: 96% (107.9 mg), colorless oil.

**<sup>1</sup>H NMR (500 MHz, CDCl<sub>3</sub>)** δ 7.61-7.46 (m, 2H), 7.42-7.27 (m, 3H), 7.13 (t, *J* = 7.6 Hz, 1H), 6.88-6.85 (m, 1H), 6.03 (s, 1H), 5.17 (s, 1H), 3.83 (s, 3H), 2.19 (s, 3H).

**<sup>13</sup>C NMR (125 MHz, CDCl<sub>3</sub>)** δ 162.74, 146.20, 140.20, 139.13, 138.77, 129.42, 127.41, 127.32, 126.39, 124.87, 123.02, 122.00, 120.61, 114.67, 113.90, 29.91, 14.94.

**HRMS(ESI)** Calculated for C<sub>17</sub>H<sub>16</sub>NOS<sup>+</sup> ([M+H]<sup>+</sup>): 282.08743, found: 282.09471.

**(3Z,5E)-5-(cyclohex-1-en-1-yl)-1-methyl-3-phenylbenzo[b]azocin-2(1H)-one (3l)**

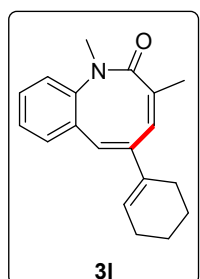

yield:80% (89.3 mg), colorless oil.

**<sup>1</sup>H NMR (500 MHz, CDCl<sub>3</sub>)** δ 7.51-7.45 (m, 2H), 7.34 (d, *J* = 8.1 Hz, 1H), 7.17-7.13 (m, 1H), 5.53 (s, 1H), 5.41 (s, 1H), 4.88 (s, 1H), 3.77 (s, 3H), 2.41-2.37 (m, 2H), 2.10 (d, *J* = 3.4 Hz, 3H), 2.01-1.93 (m, 2H), 1.78-1.73 (m, 2H), 1.60-1.54 (m, 2H).

$^{13}\text{C}$  NMR (125 MHz,  $\text{CDCl}_3$ )  $\delta$  162.66, 147.19, 145.64, 138.40, 134.26, 129.20, 129.04, 127.46, 127.16, 121.74, 121.27, 113.68, 111.97, 29.75, 25.74, 24.76, 22.65, 21.96, 14.79.

HRMS(ESI) Calculated for  $\text{C}_{19}\text{H}_{22}\text{NO}^+$  ( $[\text{M}+\text{H}]^+$ ): 280.16231, found: 280.16959.

**(3Z,5Z)-5-butyl-1,3-dimethylbenzo[*b*]azocin-2(1H)-one (3m)**

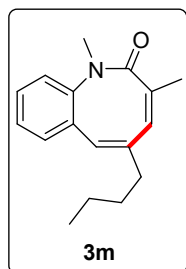

Yield: 95% (96,7 mg), colorless oil.

$^1\text{H}$  NMR (500 MHz,  $\text{CDCl}_3$ )  $\delta$  7.64-7.60 (m, 1H), 7.52-7.46 (m, 1H), 7.35 (d,  $J = 8.1$  Hz, 1H), 7.22-7.16 (m, 1H), 5.46 (d,  $J = 1.5$  Hz, 1H), 4.97 (d,  $J = 1.0$  Hz, 1H), 3.77 (s, 3H), 2.36-2.25 (m, 2H), 2.21 (s, 3H), 1.53-1.45 (m, 2H), 1.40-1.31 (m, 2H), 0.89 (t,  $J = 7.3$  Hz, 3H).

$^{13}\text{C}$  NMR (125 MHz,  $\text{CDCl}_3$ )  $\delta$  162.74, 148.24, 145.49, 138.70, 129.18, 126.92, 125.91, 121.75, 120.34, 114.96, 113.95, 36.71, 29.78, 29.54, 22.65, 14.92, 13.91.

HRMS(ESI) Calculated for  $\text{C}_{17}\text{H}_{22}\text{NO}^+$  ( $[\text{M}+\text{H}]^+$ ): 256.16231, found: 256.16959.

**(3Z,5Z)-5-cyclopropyl-1,3-dimethylbenzo[*b*]azocin-2(1H)-one (3n)**

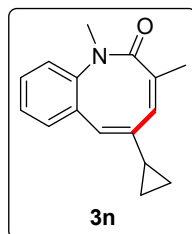

Yield: 94% (89.9 mg), colorless oil.

$^1\text{H}$  NMR (500 MHz,  $\text{CDCl}_3$ )  $\delta$  7.69 (m, 1H), 7.49 (m, 1H), 7.34 (d,  $J = 8.3$  Hz, 1H), 7.23-7.18 (m, 1H), 5.42 (d,  $J = 1.0$  Hz, 1H), 4.87 (d,  $J = 1.0$  Hz, 1H), 3.76 (s, 3H), 2.21 (s, 3H), 1.69 (m, 1H), 0.77-0.67

(m, 2H), 0.49-0.43 (m, 1H), 0.35-0.30 (m, 1H).

$^{13}\text{C}$  NMR (125 MHz,  $\text{CDCl}_3$ )  $\delta$  162.62, 146.35, 145.92, 138.53, 129.23, 127.51, 126.91, 121.77, 120.88, 113.83, 112.90, 29.78, 17.31, 15.31, 7.11, 6.82.

HRMS(ESI) Calculated for  $\text{C}_{16}\text{H}_{18}\text{NO}^+$  ( $[\text{M}+\text{H}]^+$ ): 240.13101, found: 240.13829.

**(3Z,5E)-1-methyl-5-phenylbenzo[*b*]azocin-2(1H)-one (3o)**

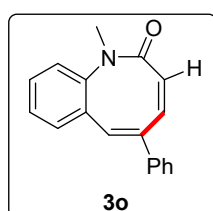

Yield: 96% (100.2 mg), white solid, mp: 89-91 °C.

**<sup>1</sup>H NMR (500 MHz, CDCl<sub>3</sub>)** δ 7.53 (m, 1H), 7.46-7.35 (m, 4H), 7.35-7.28 (m, 3H), 7.09-7.05 (m, 1H), 6.77 (s, 1H), 5.94 (d, *J* = 0.5 Hz, 1H), 5.44 (d, *J* = 0.5 Hz, 1H), 3.79 (s, 3H).

**<sup>13</sup>C NMR (125 MHz, CDCl<sub>3</sub>)** δ 162.16, 150.82, 145.54, 140.12, 138.78, 130.52, 128.67, 128.33, 127.92, 126.31, 121.93, 121.82, 120.27, 116.83, 114.33, 29.44.

**HRMS(ESI)** Calculated for C<sub>18</sub>H<sub>16</sub>NO<sup>+</sup> ([M+H]<sup>+</sup>): 262.11536, found: 262.12264.

**(3*Z*,5*E*)-1-methyl-3,5-diphenylbenzo[*b*]azocin-2(1*H*)-one (3p)**

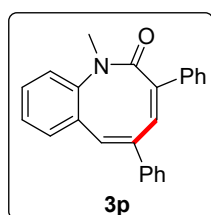

Yield: 80% (107.9 mg), colorless oil.

**<sup>1</sup>H NMR (500 MHz, CDCl<sub>3</sub>)** δ 7.71-7.67 (m, 1H), 7.61-7.56 (m, 1H), 7.47 (d, *J* = 8.1 Hz, 1H), 7.27-7.20 (m, 8H), 7.19-7.14 (m, 3H), 5.92 (s, 1H), 5.18 (s, 1H), 3.87 (s, 3H).

**<sup>13</sup>C NMR (125 MHz, CDCl<sub>3</sub>)** δ 161.96, 147.50, 143.30, 139.50, 139.16, 136.08, 132.12, 130.32, 129.69, 128.36, 128.32, 127.87, 127.50, 127.10, 125.96, 122.10, 120.79, 117.55, 114.06, 30.04.

**HRMS(ESI)** Calculated for C<sub>24</sub>H<sub>20</sub>NO<sup>+</sup> ([M+H]<sup>+</sup>): 338.14666, found: 338.15394.

**(3*Z*,5*E*)-1-(methoxymethyl)-3-methyl-5-phenylbenzo[*b*]azocin-2(1*H*)-one (3q)**

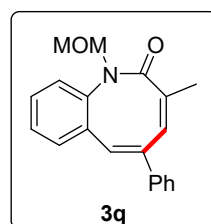

Yield: 97% (118.4 mg), colorless oil.

**<sup>1</sup>H NMR (500 MHz, CDCl<sub>3</sub>)** δ 7.62-7.54 (m, 2H), 7.50-7.45 (m, 1H), 7.41-7.37 (m, 2H), 7.35-7.28 (m, 3H), 7.15-7.11 (m, 1H), 6.16 (s, 1H), 5.92-5.80 (m, 2H), 5.27 (s, 1H), 3.53 (s, 3H), 2.19 (s,

3H).

**<sup>13</sup>C NMR (125 MHz, CDCl<sub>3</sub>)** δ 163.27, 147.59, 143.84, 137.90, 137.82, 129.55, 128.81, 128.39, 127.37, 127.31, 125.80, 122.62, 120.96, 115.87, 115.00, 73.90, 56.80, 14.88.

**HRMS(ESI)** Calculated for C<sub>20</sub>H<sub>20</sub>NO<sub>2</sub><sup>+</sup> ([M+H]<sup>+</sup>): 306.14158, found: 306.14886.

**(3*Z*,5*E*)-1-benzyl-3-methyl-5-phenylbenzo[*b*]azocin-2(1*H*)-one (3r)**

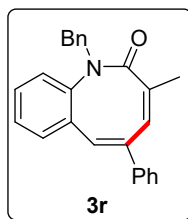

Yield: 91% (127.8 mg), white solid, mp: 122-124 °C.

$^1\text{H NMR}$  (500 MHz,  $\text{CDCl}_3$ )  $\delta$  7.60-7.56 (m, 1H), 7.43-7.39 (m, 2H), 7.39-7.27 (m, 10H), 7.10-7.06 (m, 1H), 6.19 (s, 1H), 5.75 (d,  $J = 15.5$  Hz, 1H), 5.59 (d,  $J = 15.5$  Hz, 1H), 5.30 (s, 1H), 2.25 (s, 3H).

$^{13}\text{C NMR}$  (125 MHz,  $\text{CDCl}_3$ )  $\delta$  162.87, 146.87, 143.92, 138.26, 137.96, 136.69, 129.38, 128.80, 128.36, 127.70, 127.49, 127.23, 126.76, 125.82, 122.09, 121.15, 115.97, 114.80, 46.60, 15.09.

HRMS(ESI) Calculated for  $\text{C}_{25}\text{H}_{22}\text{NO}^+$  ( $[\text{M}+\text{H}]^+$ ): 352.16231, found: 352.16959.

### 3.3 Gram-scale reaction

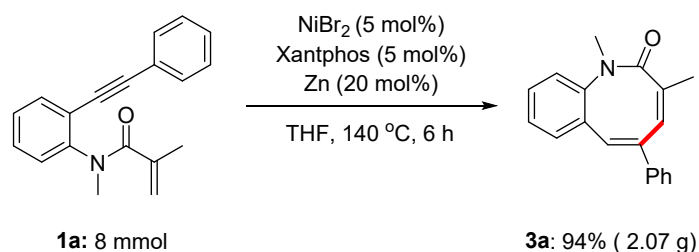

In a 250 mL flame-dried Schlenk tube, 1, 7-Enynes (8 mmol, 2.2 g),  $\text{NiBr}_2$  (5 mol%), **L1** (5 mol%), Zn (0.2 equiv), THF (25 mL) were added sequentially under nitrogen. The tube was sealed and stirred at 140 °C for 6 h. After completion, the reaction mixture was filtered through a short pad of silica gel and washed with ethyl acetate. The combined organic phase was concentrated and purified by silica gel column chromatography (Petroleum ether : Ethyl acetate = 10 : 1) to provide the product **3a** in 94% yield.

## 4 Mechanistic experiments

### 4.1 Radical inhibition reaction

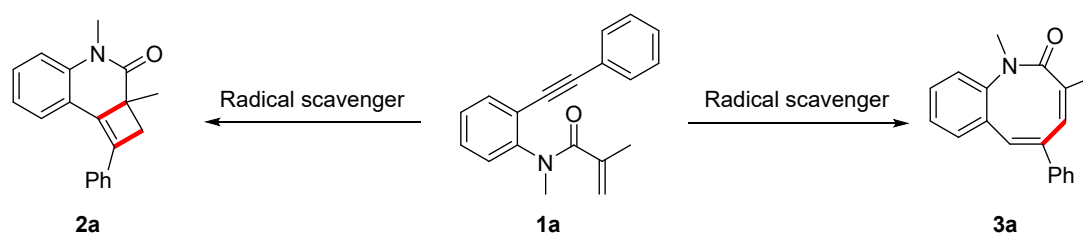

| Radical scavenger    | Yield/ <b>2a</b> | Yield/ <b>3a</b> |
|----------------------|------------------|------------------|
| TEMPO                | 0                | 0                |
| BHT                  | 90%              | 89%              |
| 1,1-diphenylethylene | 93%              | 91%              |

(a) *General procedure for the radical inhibition reaction:* In a 25 mL flame-dried Schlenk tube, **1a** (0.4 mmol), NiBr<sub>2</sub> (5 mol%, 0.02 mmol), **L1** (5 mol%, 0.02 mmol), Zn (0.2 equiv, 0.08 mmol), radical scavenger (1 equiv, 0.4 mmol), THF (4 mL) were added sequentially under nitrogen. The tube was sealed and stirred at 60 °C for 6 h. After completion, the reaction mixture was filtered through a short pad of silica gel and washed with ethyl acetate (20 mL). The combined organic phase was concentrated and purified by silica gel column chromatography (Petroleum ether : Ethyl acetate = 50 : 1) to provide the product **2a**.

(b) *General procedure for the radical inhibition reaction:* In a 25 mL flame-dried Schlenk tube, **1a** (0.4 mmol), NiBr<sub>2</sub> (5 mol%, 0.02 mmol), **L1** (5 mol%, 0.02 mmol), Zn (0.2 equiv, 0.08 mmol), radical scavenger (1 equiv, 0.4 mmol), THF (4 mL) were added sequentially under nitrogen. The tube was sealed and stirred at 140 °C for 6 h. After completion, the reaction mixture was filtered through a short pad of silica gel and washed with ethyl acetate (20 mL). The combined organic phase was concentrated and purified by silica gel column chromatography (Petroleum ether : Ethyl acetate = 10 : 1) to provide the product **3a**.

#### 4.2 Time evaluation for the model reaction

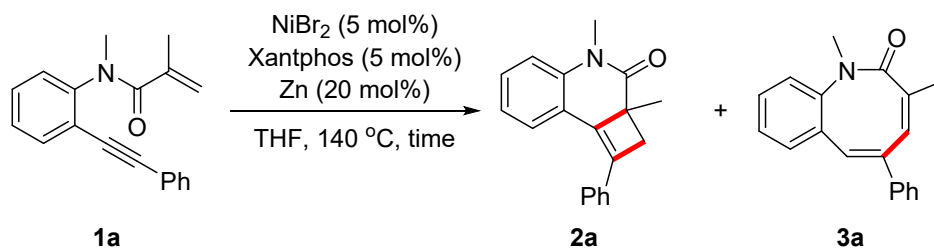

| time/h | yield/ <b>2a</b> | yield/ <b>3a</b> |
|--------|------------------|------------------|
| 0.5    | 78%              | 17%              |
| 1      | 55%              | 42%              |

In a 25 mL flame-dried Schlenk tube, **1a** (0.4 mmol),  $\text{NiBr}_2$  (5 mol%, 0.02 mmol), **L1** (5 mol%, 0.02 mmol), Zn (0.2 equiv, 0.08 mmol), THF (4 mL) were added sequentially under nitrogen. The tube was sealed and stirred at 140 °C for 0.5 h or 1 h. After completion, the reaction mixture was filtered through a short pad of silica gel and washed with ethyl acetate (20 mL). The combined organic phase was concentrated and purified by silica gel column chromatography (Petroleum ether : Ethyl acetate = 10 : 1) to provide the product **2a** and **3a**.

#### 4.3 Formation of **3a** from **2a**

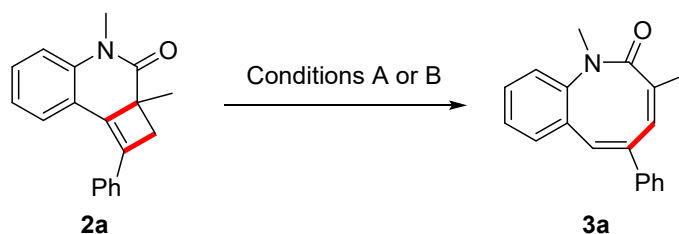

*Conditions A:* In a 25 mL flame-dried Schlenk tube, **2a** (0.4 mmol),  $\text{NiBr}_2$  (5 mol%, 0.02 mmol), **L1** (5 mol%, 0.02 mmol), Zn (0.2 equiv, 0.08 mmol), THF (4 mL) were added sequentially under nitrogen. The tube was sealed and stirred at 140 °C for 0.5 h or 1 h. After completion, the reaction mixture was filtered through a short pad of silica gel and washed with ethyl acetate (20 mL). The combined organic phase was concentrated and purified by silica gel column chromatography (Petroleum ether : Ethyl acetate = 10 : 1) to provide the product **3a** in 17% and 44% yield, respectively.

*Conditions B:* In a 25 mL flame-dried Schlenk tube, **2a** (0.4 mmol) in THF (4 mL), under nitrogen. The tube was sealed and stirred at 140 °C for 0.5 h or 1 h. After

completion, the reaction mixture was filtered through a short pad of silica gel and washed with ethyl acetate (20 mL). The combined organic phase was concentrated and purified by silica gel column chromatography (Petroleum ether : Ethyl acetate = 10 : 1) to provide the product **3a** in 18% and 46% yield, respectively.



## 5. X-Ray Crystallography of 2i

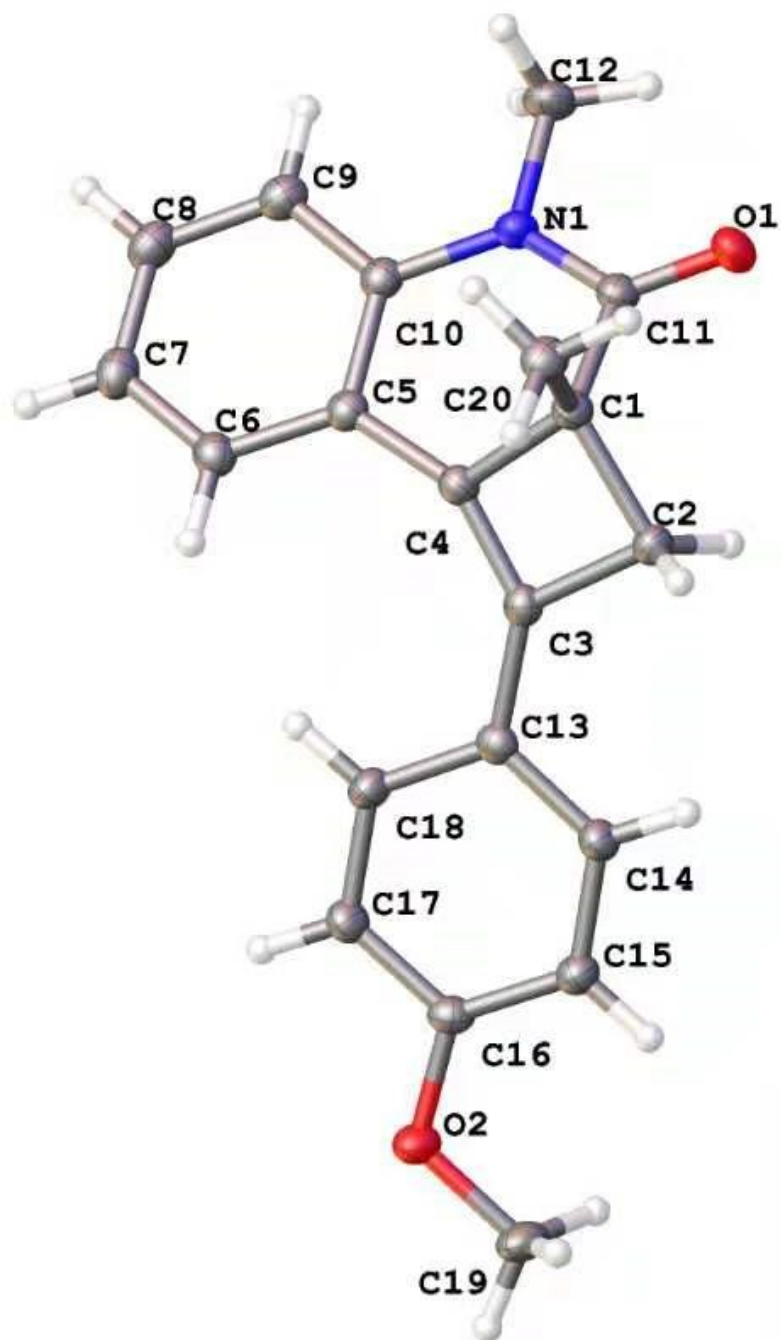

Figure S1. The X-Ray Crystallographic Structure of 2i

**Table S1. Crystal data and structure refinement for 2i**

|                                   |                                                                                                  |
|-----------------------------------|--------------------------------------------------------------------------------------------------|
| Identification code               | 2103027077                                                                                       |
| Empirical formula                 | C <sub>20</sub> H <sub>19</sub> N O <sub>2</sub>                                                 |
| Formula weight                    | 305.36                                                                                           |
| Temperature                       | 173.0 K                                                                                          |
| Wavelength                        | 1.34139 Å                                                                                        |
| Crystal system                    | Orthorhombic                                                                                     |
| Space group                       | Pna2 <sub>1</sub>                                                                                |
| Unit cell dimensions              | a = 36.302(4) Å      a = 90°.<br>b = 8.0420(10) Å      b = 90°.<br>c = 5.3509(6) Å      g = 90°. |
| Volume                            | 1562.1(3) Å <sup>3</sup>                                                                         |
| Z                                 | 4                                                                                                |
| Density (calculated)              | 1.298 Mg/m <sup>3</sup>                                                                          |
| Absorption coefficient            | 0.427 mm <sup>-1</sup>                                                                           |
| F(000)                            | 648                                                                                              |
| Crystal size                      | 0.07 x 0.06 x 0.05 mm <sup>3</sup>                                                               |
| Theta range for data collection   | 4.238 to 54.989°.                                                                                |
| Index ranges                      | -44 ≤ h ≤ 42, -6 ≤ k ≤ 9, -6 ≤ l ≤ 5                                                             |
| Reflections collected             | 9828                                                                                             |
| Independent reflections           | 2815 [R(int) = 0.0479]                                                                           |
| Completeness to theta = 53.594°   | 99.6 %                                                                                           |
| Absorption correction             | Semi-empirical from equivalents                                                                  |
| Max. and min. transmission        | 0.7508 and 0.4755                                                                                |
| Refinement method                 | Full-matrix least-squares on F <sup>2</sup>                                                      |
| Data / restraints / parameters    | 2815 / 1 / 211                                                                                   |
| Goodness-of-fit on F <sup>2</sup> | 1.061                                                                                            |
| Final R indices [I > 2σ(I)]       | R1 = 0.0424, wR2 = 0.1024                                                                        |
| R indices (all data)              | R1 = 0.0536, wR2 = 0.1113                                                                        |
| Absolute structure parameter      | 0.2(3)                                                                                           |
| Extinction coefficient            | n/a                                                                                              |
| Largest diff. peak and hole       | 0.137 and -0.181 e.Å <sup>-3</sup>                                                               |

**Table S2. Atomic coordinates ( x 10<sup>4</sup>) and equivalent isotropic displacement**

parameters ( $\text{\AA}^2 \times 10^3$ ) for 2-11. U(eq) is defined as one third of the trace of the orthogonalized  $U_{ij}$  tensor.

| Atom  | x       | y        | z       | U(eq) |
|-------|---------|----------|---------|-------|
| O(1)  | 2923(1) | 8362(3)  | 677(4)  | 47(1) |
| O(2)  | 5509(1) | 7045(3)  | 2423(4) | 41(1) |
| N(1)  | 3001(1) | 6458(3)  | 3795(5) | 35(1) |
| C(1)  | 3424(1) | 8795(4)  | 3526(6) | 32(1) |
| C(2)  | 3742(1) | 9340(4)  | 1744(6) | 33(1) |
| C(3)  | 3985(1) | 8177(3)  | 3284(6) | 31(1) |
| C(4)  | 3699(1) | 7634(4)  | 4691(6) | 31(1) |
| C(5)  | 3571(1) | 6303(4)  | 6320(6) | 31(1) |
| C(6)  | 3765(1) | 5569(4)  | 8275(6) | 36(1) |
| C(7)  | 3611(1) | 4303(4)  | 9685(7) | 42(1) |
| C(8)  | 3259(1) | 3758(4)  | 9140(7) | 44(1) |
| C(9)  | 3056(1) | 4479(4)  | 7226(6) | 41(1) |
| C(10) | 3207(1) | 5761(4)  | 5802(6) | 33(1) |
| C(11) | 3101(1) | 7859(4)  | 2463(6) | 34(1) |
| C(12) | 2649(1) | 5682(4)  | 3125(8) | 48(1) |
| C(13) | 4377(1) | 7857(3)  | 3022(6) | 31(1) |
| C(14) | 4577(1) | 8618(4)  | 1109(6) | 35(1) |
| C(15) | 4953(1) | 8392(4)  | 832(6)  | 36(1) |
| C(16) | 5139(1) | 7373(4)  | 2495(6) | 33(1) |
| C(17) | 4948(1) | 6590(4)  | 4403(6) | 37(1) |
| C(18) | 4575(1) | 6821(4)  | 4671(6) | 36(1) |
| C(19) | 5713(1) | 7722(4)  | 379(7)  | 49(1) |
| C(20) | 3277(1) | 10172(4) | 5225(7) | 40(1) |

**Table S3. Bond lengths [ $\text{\AA}$ ] for 2i**

| Atom 1,2   | d 1,2 [ $\text{\AA}$ ] | Atom 1,2   | d 1,2 [ $\text{\AA}$ ] |
|------------|------------------------|------------|------------------------|
| O(1)-C(11) | 1.224(4)               | C(8)-C(9)  | 1.389(5)               |
| O(2)-C(16) | 1.370(3)               | C(9)-H(9)  | 0.9500                 |
| O(2)-C(19) | 1.428(4)               | C(9)-C(10) | 1.394(4)               |

|            |          |              |          |
|------------|----------|--------------|----------|
| N(1)-C(10) | 1.424(4) | C(12)-H(12A) | 0.9800   |
| N(1)-C(11) | 1.382(4) | C(12)-H(12B) | 0.9800   |
| N(1)-C(12) | 1.467(4) | C(12)-H(12C) | 0.9800   |
| C(1)-C(2)  | 1.562(4) | C(13)-C(14)  | 1.396(4) |
| C(1)-C(4)  | 1.504(4) | C(13)-C(18)  | 1.410(4) |
| C(1)-C(11) | 1.503(4) | C(14)-H(14)  | 0.9500   |
| C(1)-C(20) | 1.528(4) | C(14)-C(15)  | 1.384(4) |
| C(2)-H(2A) | 0.9900   | C(15)-H(15)  | 0.9500   |
| C(2)-H(2B) | 0.9900   | C(15)-C(16)  | 1.386(4) |
| C(2)-C(3)  | 1.528(4) | C(16)-C(17)  | 1.387(4) |
| C(3)-C(4)  | 1.355(4) | C(17)-H(17)  | 0.9500   |
| C(3)-C(13) | 1.453(4) | C(17)-C(18)  | 1.374(4) |
| C(4)-C(5)  | 1.456(4) | C(18)-H(18)  | 0.9500   |
| C(5)-C(6)  | 1.392(4) | C(19)-H(19A) | 0.9800   |
| C(5)-C(10) | 1.419(4) | C(19)-H(19B) | 0.9800   |
| C(6)-H(6)  | 0.9500   | C(19)-H(19C) | 0.9800   |
| C(6)-C(7)  | 1.384(4) | C(20)-H(20A) | 0.9800   |
| C(7)-H(7)  | 0.9500   | C(20)-H(20B) | 0.9800   |
| C(8)-H(8)  | 0.9500   |              |          |

**Table S4. Bond angles[°] for 2i**

| Atom 1,2,3       | Angle 1,2,3[°] | Atom 1,2,3          | Angle 1,2,3[°] |
|------------------|----------------|---------------------|----------------|
| C(16)-O(2)-C(19) | 117.1(2)       | O(1)-C(11)-N(1)     | 122.2(3)       |
| C(10)-N(1)-C(12) | 118.4(2)       | O(1)-C(11)-C(1)     | 122.9(3)       |
| C(11)-N(1)-C(10) | 124.8(2)       | N(1)-C(11)-C(1)     | 114.7(2)       |
| C(11)-N(1)-C(12) | 116.8(2)       | N(1)-C(12)-H(12A)   | 109.5          |
| C(4)-C(1)-C(2)   | 86.3(2)        | N(1)-C(12)-H(12B)   | 109.5          |
| C(4)-C(1)-C(20)  | 115.8(3)       | N(1)-C(12)-H(12C)   | 109.5          |
| C(11)-C(1)-C(2)  | 119.1(3)       | H(12A)-C(12)-H(12B) | 109.5          |
| C(11)-C(1)-C(4)  | 111.3(2)       | H(12A)-C(12)-H(12C) | 109.5          |
| C(11)-C(1)-C(20) | 108.5(2)       | H(12B)-C(12)-H(12C) | 109.5          |
| C(20)-C(1)-C(2)  | 114.7(2)       | C(14)-C(13)-C(3)    | 120.2(3)       |
| C(1)-C(2)-H(2A)  | 114.4          | C(14)-C(13)-C(18)   | 117.0(2)       |
| C(1)-C(2)-H(2B)  | 114.4          | C(18)-C(13)-C(3)    | 122.8(3)       |

|                  |          |                     |          |
|------------------|----------|---------------------|----------|
| H(2A)-C(2)-H(2B) | 111.5    | C(13)-C(14)-H(14)   | 118.9    |
| C(3)-C(2)-C(1)   | 85.8(2)  | C(15)-C(14)-C(13)   | 122.2(3) |
| C(3)-C(2)-H(2A)  | 114.4    | C(15)-C(14)-H(14)   | 118.9    |
| C(3)-C(2)-H(2B)  | 114.4    | C(14)-C(15)-H(15)   | 120.3    |
| C(4)-C(3)-C(2)   | 93.1(2)  | C(14)-C(15)-C(16)   | 119.3(3) |
| C(4)-C(3)-C(13)  | 138.3(3) | C(16)-C(15)-H(15)   | 120.3    |
| C(13)-C(3)-C(2)  | 128.5(3) | O(2)-C(16)-C(15)    | 125.1(3) |
| C(3)-C(4)-C(1)   | 94.6(2)  | O(2)-C(16)-C(17)    | 115.2(3) |
| C(3)-C(4)-C(5)   | 144.5(3) | C(15)-C(16)-C(17)   | 119.8(2) |
| C(5)-C(4)-C(1)   | 119.4(2) | C(16)-C(17)-H(17)   | 119.7    |
| C(6)-C(5)-C(4)   | 126.9(2) | C(18)-C(17)-C(16)   | 120.6(3) |
| C(6)-C(5)-C(10)  | 119.1(3) | C(18)-C(17)-H(17)   | 119.7    |
| C(10)-C(5)-C(4)  | 114.0(2) | C(13)-C(18)-H(18)   | 119.5    |
| C(5)-C(6)-H(6)   | 119.4    | C(17)-C(18)-C(13)   | 121.0(3) |
| C(7)-C(6)-C(5)   | 121.2(3) | C(17)-C(18)-H(18)   | 119.5    |
| C(7)-C(6)-H(6)   | 119.4    | O(2)-C(19)-H(19A)   | 109.5    |
| C(6)-C(7)-H(7)   | 120.3    | O(2)-C(19)-H(19B)   | 109.5    |
| C(8)-C(7)-C(6)   | 119.4(3) | O(2)-C(19)-H(19C)   | 109.5    |
| C(8)-C(7)-H(7)   | 120.3    | H(19A)-C(19)-H(19B) | 109.5    |
| C(7)-C(8)-H(8)   | 119.5    | H(19A)-C(19)-H(19C) | 109.5    |
| C(7)-C(8)-C(9)   | 120.9(3) | H(19B)-C(19)-H(19C) | 109.5    |
| C(9)-C(8)-H(8)   | 119.5    | C(1)-C(20)-H(20A)   | 109.5    |
| C(8)-C(9)-H(9)   | 119.9    | C(1)-C(20)-H(20B)   | 109.5    |
| C(8)-C(9)-C(10)  | 120.1(3) | C(1)-C(20)-H(20C)   | 109.5    |
| C(10)-C(9)-H(9)  | 119.9    | H(20A)-C(20)-H(20B) | 109.5    |
| C(5)-C(10)-N(1)  | 121.1(3) | H(20A)-C(20)-H(20C) | 109.5    |
| C(9)-C(10)-N(1)  | 119.7(2) | H(20B)-C(20)-H(20C) | 109.5    |
| C(9)-C(10)-C(5)  | 119.2(3) |                     |          |

**Table S5. Anisotropic displacement parameters ( $\text{\AA}^2 \times 10^3$ ) for 1-2l. The anisotropic displacement factor exponent takes the form:  $-2p^2 [ h^2 a^* U^{11} + \dots + 2 h k a^* b^* U^{12} ]$**

| Atom  | U11   | U22   | U33   | U23   | U13   | U12   |
|-------|-------|-------|-------|-------|-------|-------|
| O(1)  | 35(1) | 59(2) | 47(2) | 14(1) | -9(1) | 1(1)  |
| O(2)  | 30(1) | 44(1) | 48(1) | 9(1)  | 6(1)  | 4(1)  |
| N(1)  | 27(1) | 40(2) | 37(2) | 4(1)  | 0(1)  | -5(1) |
| C(1)  | 28(1) | 33(2) | 36(2) | 4(1)  | 1(1)  | 3(1)  |
| C(2)  | 31(1) | 35(2) | 33(2) | 5(1)  | 1(1)  | -1(1) |
| C(3)  | 33(1) | 31(2) | 28(2) | 0(1)  | -1(1) | 0(1)  |
| C(4)  | 29(1) | 32(2) | 32(2) | 0(1)  | -2(1) | 0(1)  |
| C(5)  | 32(1) | 31(2) | 30(2) | -1(1) | 3(1)  | 1(1)  |
| C(6)  | 36(1) | 36(2) | 35(2) | 0(1)  | 0(1)  | 4(1)  |
| C(7)  | 50(2) | 39(2) | 37(2) | 6(2)  | 4(1)  | 7(1)  |
| C(8)  | 50(2) | 39(2) | 44(2) | 6(2)  | 9(2)  | -2(2) |
| C(9)  | 40(2) | 40(2) | 43(2) | 1(2)  | 6(1)  | -3(1) |
| C(10) | 33(1) | 32(2) | 32(2) | 0(1)  | 4(1)  | 2(1)  |
| C(11) | 27(1) | 39(2) | 38(2) | 4(1)  | 1(1)  | 2(1)  |
| C(12) | 31(2) | 56(2) | 58(2) | 6(2)  | 0(2)  | -8(1) |
| C(13) | 30(1) | 32(2) | 30(2) | -3(1) | -2(1) | -1(1) |
| C(14) | 31(1) | 38(2) | 36(2) | 6(1)  | -1(1) | 3(1)  |
| C(15) | 32(1) | 40(2) | 35(2) | 4(1)  | 3(1)  | -1(1) |
| C(16) | 27(1) | 33(2) | 39(2) | -3(1) | 2(1)  | 1(1)  |
| C(17) | 33(1) | 37(2) | 39(2) | 5(2)  | -1(1) | 5(1)  |
| C(18) | 33(1) | 38(2) | 35(2) | 6(2)  | 4(1)  | -2(1) |
| C(19) | 33(2) | 56(2) | 57(2) | 13(2) | 13(2) | 2(2)  |
| C(20) | 39(2) | 37(2) | 43(2) | 1(2)  | 5(1)  | 6(1)  |

**Table S6. Hydrogen coordinates (  $\times 10^4$ ) and isotropic displacement parameters ( $\text{\AA}^2 \times 10^3$ ) for 2i.**

| Atom  | x    | y     | z     | U(eq) |
|-------|------|-------|-------|-------|
| H(2A) | 3709 | 8995  | -18   | 40    |
| H(2B) | 3809 | 10530 | 1870  | 40    |
| H(6)  | 4007 | 5943  | 8649  | 43    |
| H(7)  | 3746 | 3814  | 11015 | 50    |

|        |      |       |       |    |
|--------|------|-------|-------|----|
| H(8)   | 3155 | 2877  | 10088 | 53 |
| H(9)   | 2813 | 4099  | 6885  | 49 |
| H(12A) | 2686 | 4487  | 2870  | 73 |
| H(12B) | 2555 | 6183  | 1581  | 73 |
| H(12C) | 2471 | 5857  | 4475  | 73 |
| H(14)  | 4451 | 9314  | -43   | 42 |
| H(15)  | 5082 | 8930  | -484  | 43 |
| H(17)  | 5075 | 5886  | 5536  | 44 |
| H(18)  | 4448 | 6274  | 5989  | 43 |
| H(19A) | 5602 | 7357  | -1199 | 73 |
| H(19B) | 5968 | 7336  | 463   | 73 |
| H(19C) | 5707 | 8939  | 468   | 73 |
| H(20A) | 3132 | 9678  | 6579  | 60 |
| H(20B) | 3121 | 10927 | 4251  | 60 |
| H(20C) | 3484 | 10794 | 5936  | 60 |

---

## 6. References

1. J. T. M. Correia, G. Piva da Silva, E. André and M. W. Paixão, *Adv. Synth. Catal.* 2019, **361**, 5558.
2. C. Wu, J. Liao and S. Ge, *Angew. Chem. Int. Ed.* 2019, **58**, 8882.
3. H.-Y. Liu, Y. Lu, Y. Li and J.-H. Li, *Organ. Lett.* 2020, **22**, 8819.
4. Y. Qu, W. Xu, J. Zhang, Y. Liu, Y. Li, H. Song and Q. Wang, *J. Org. Chem.* 2020, **85**, 5379.



## 7. $^1\text{H-NMR}$ and $^{13}\text{C-NMR}$ Spectra

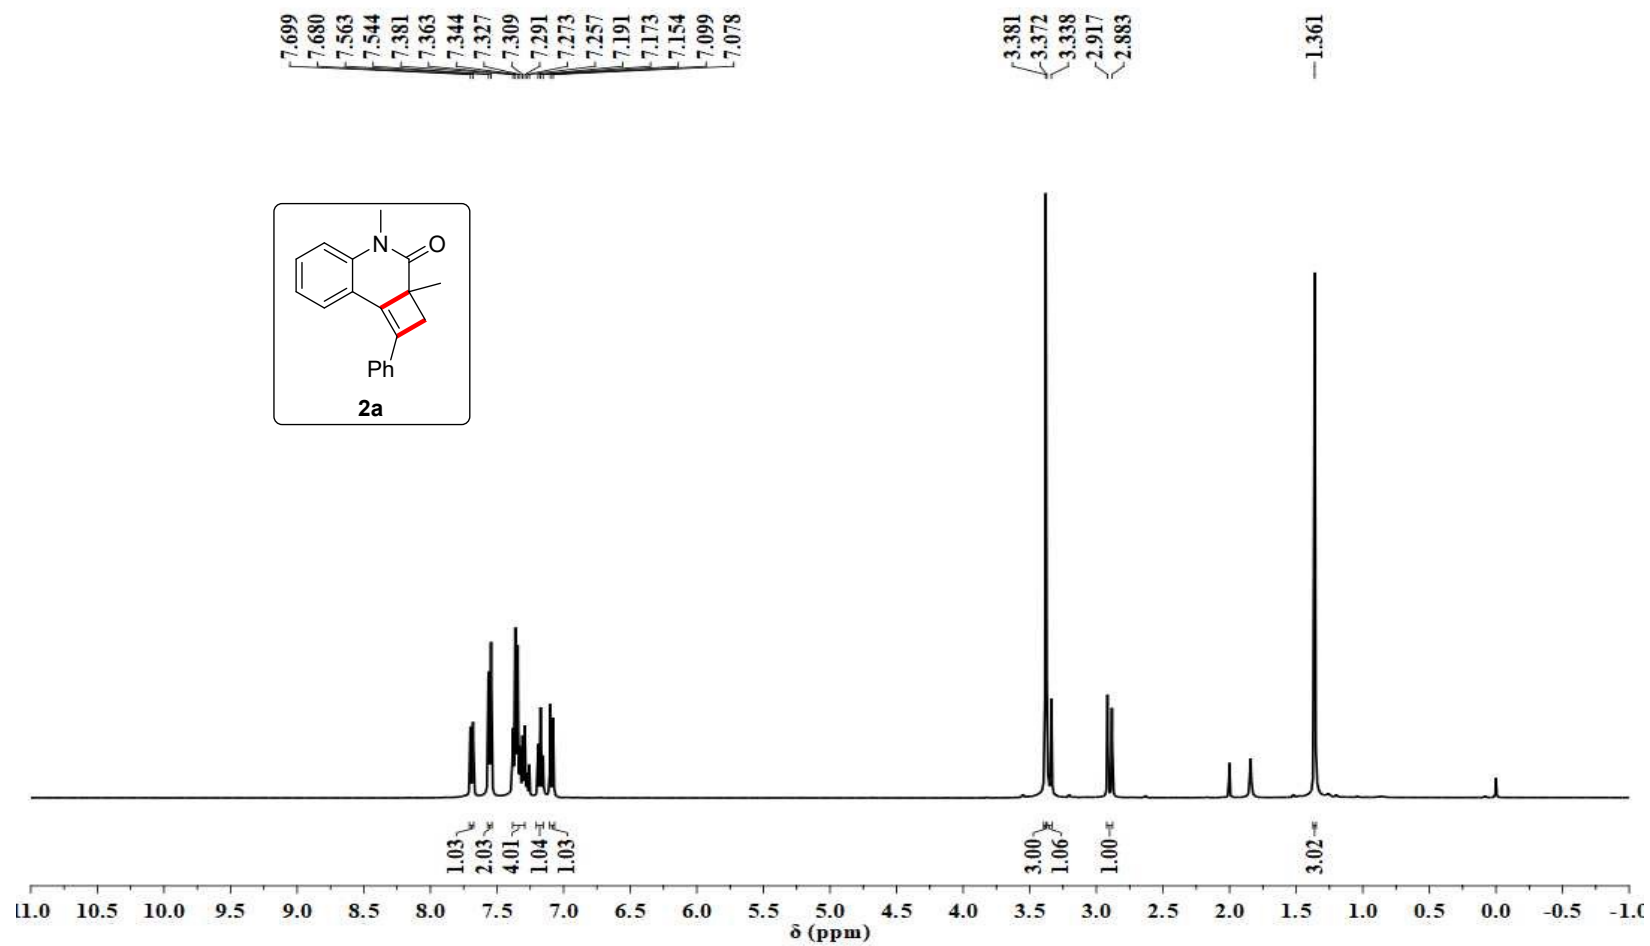

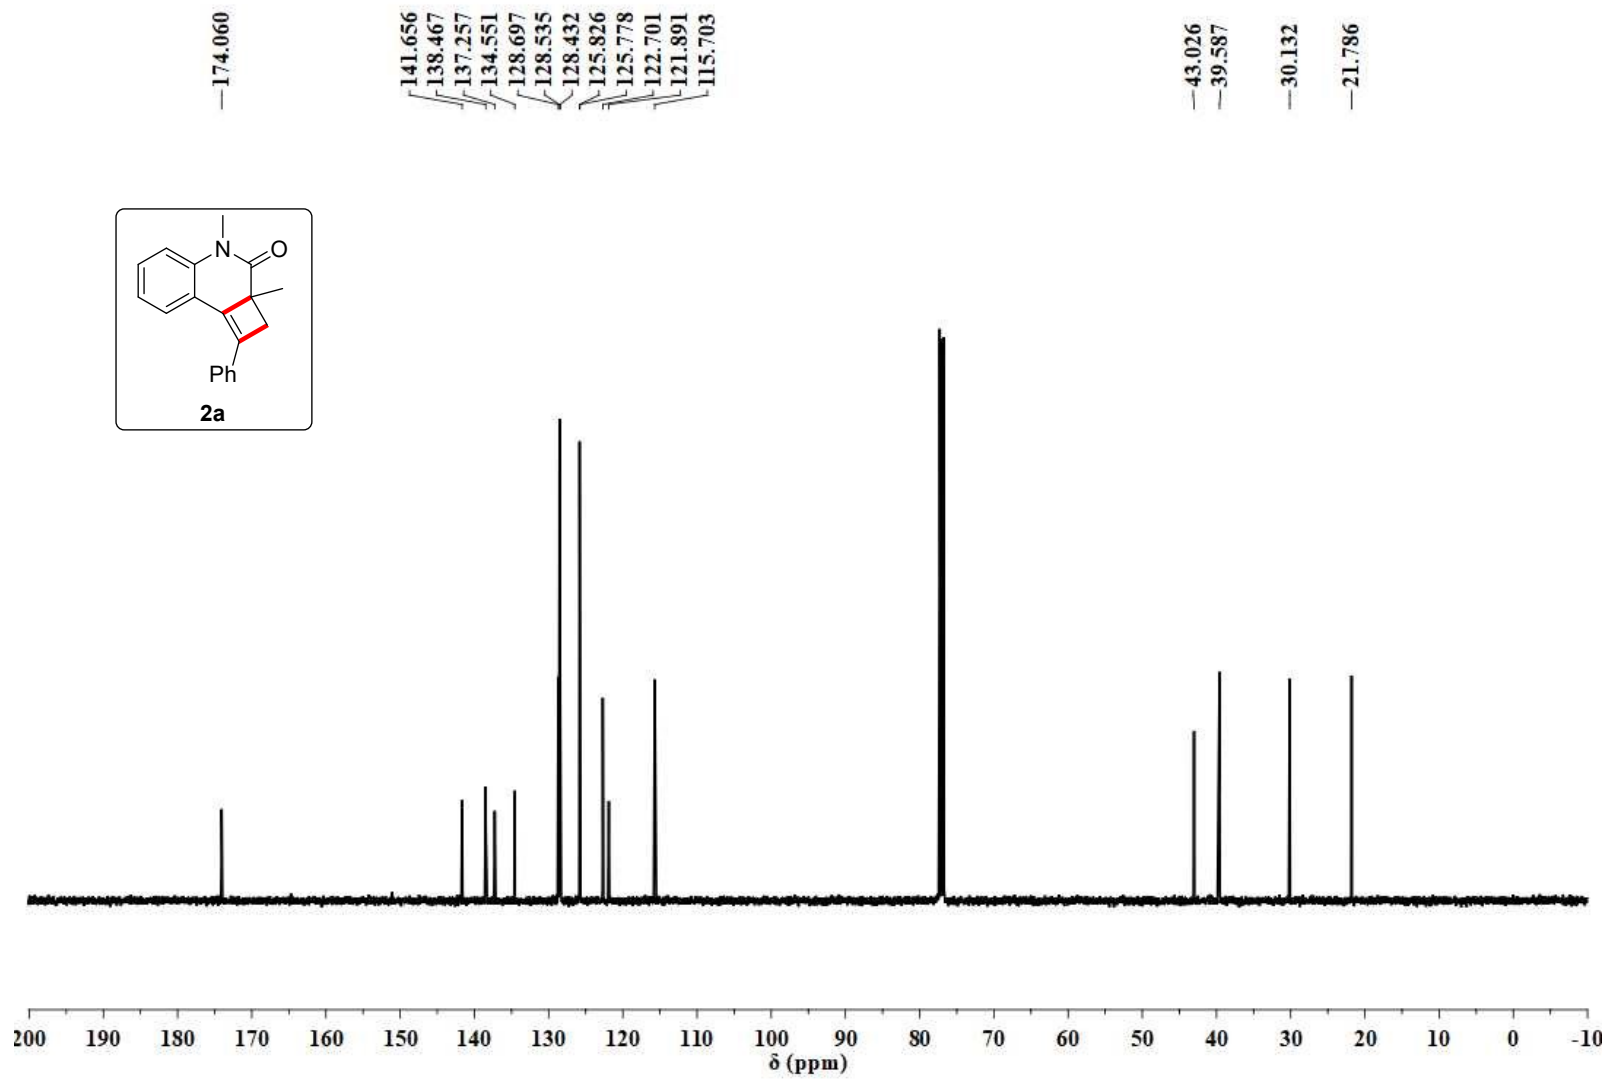

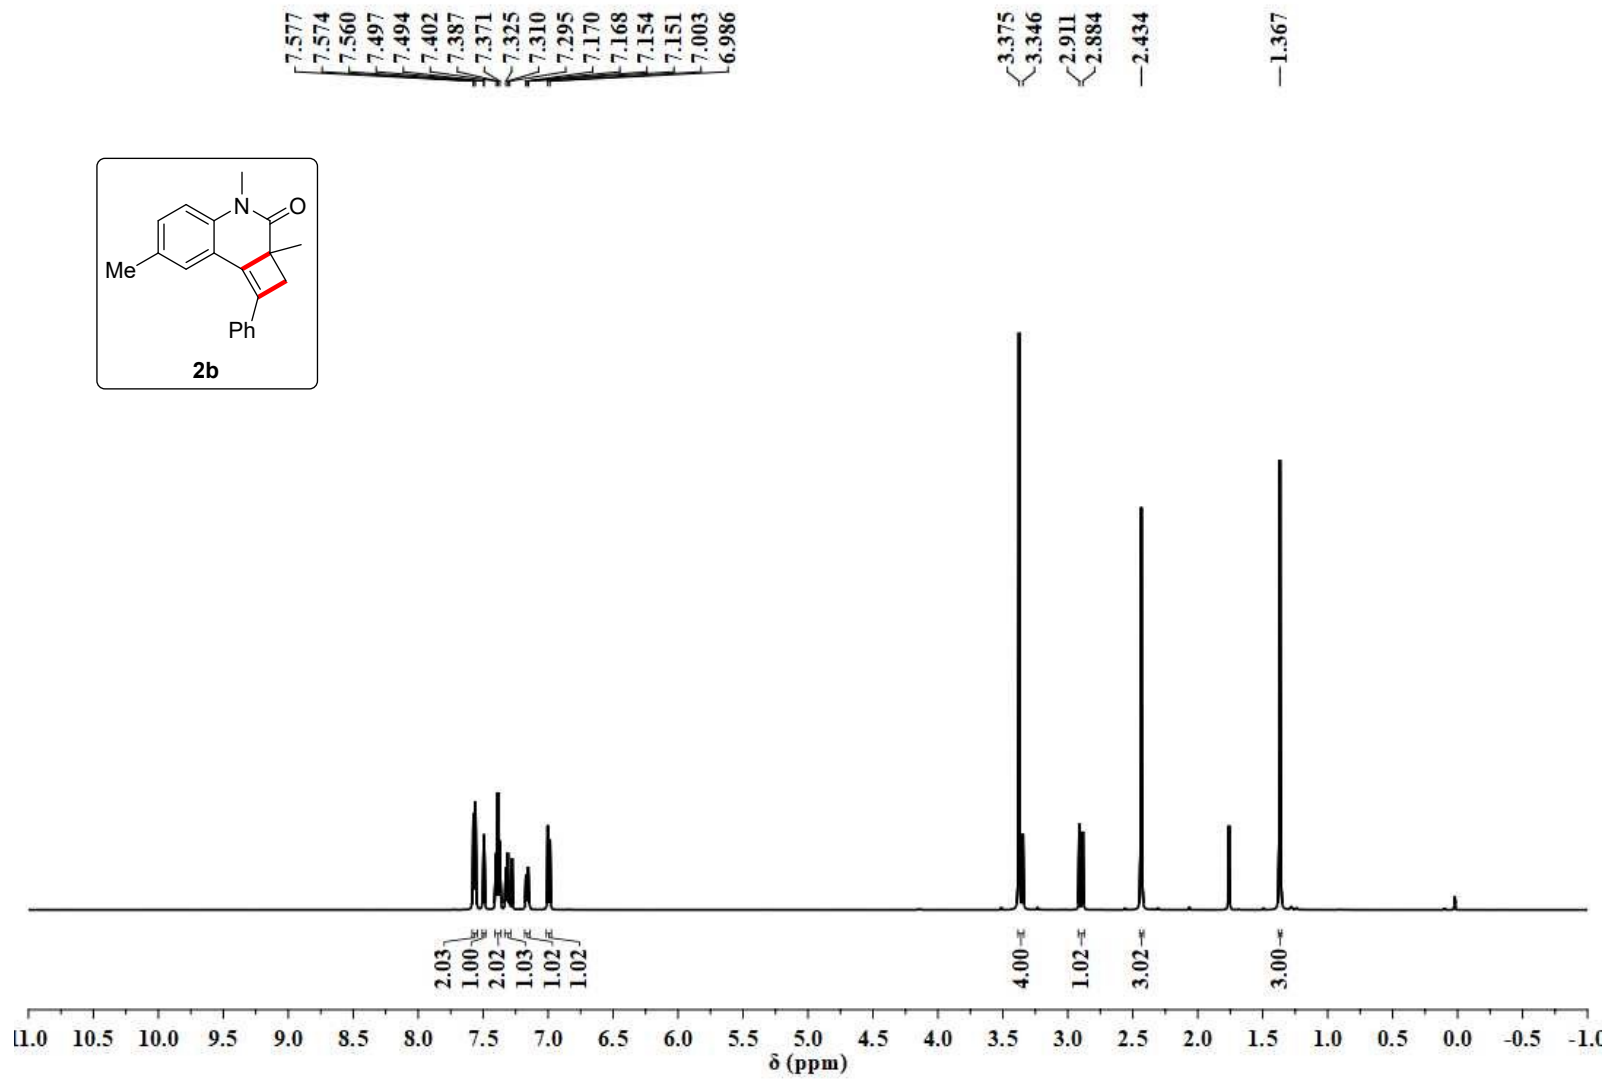

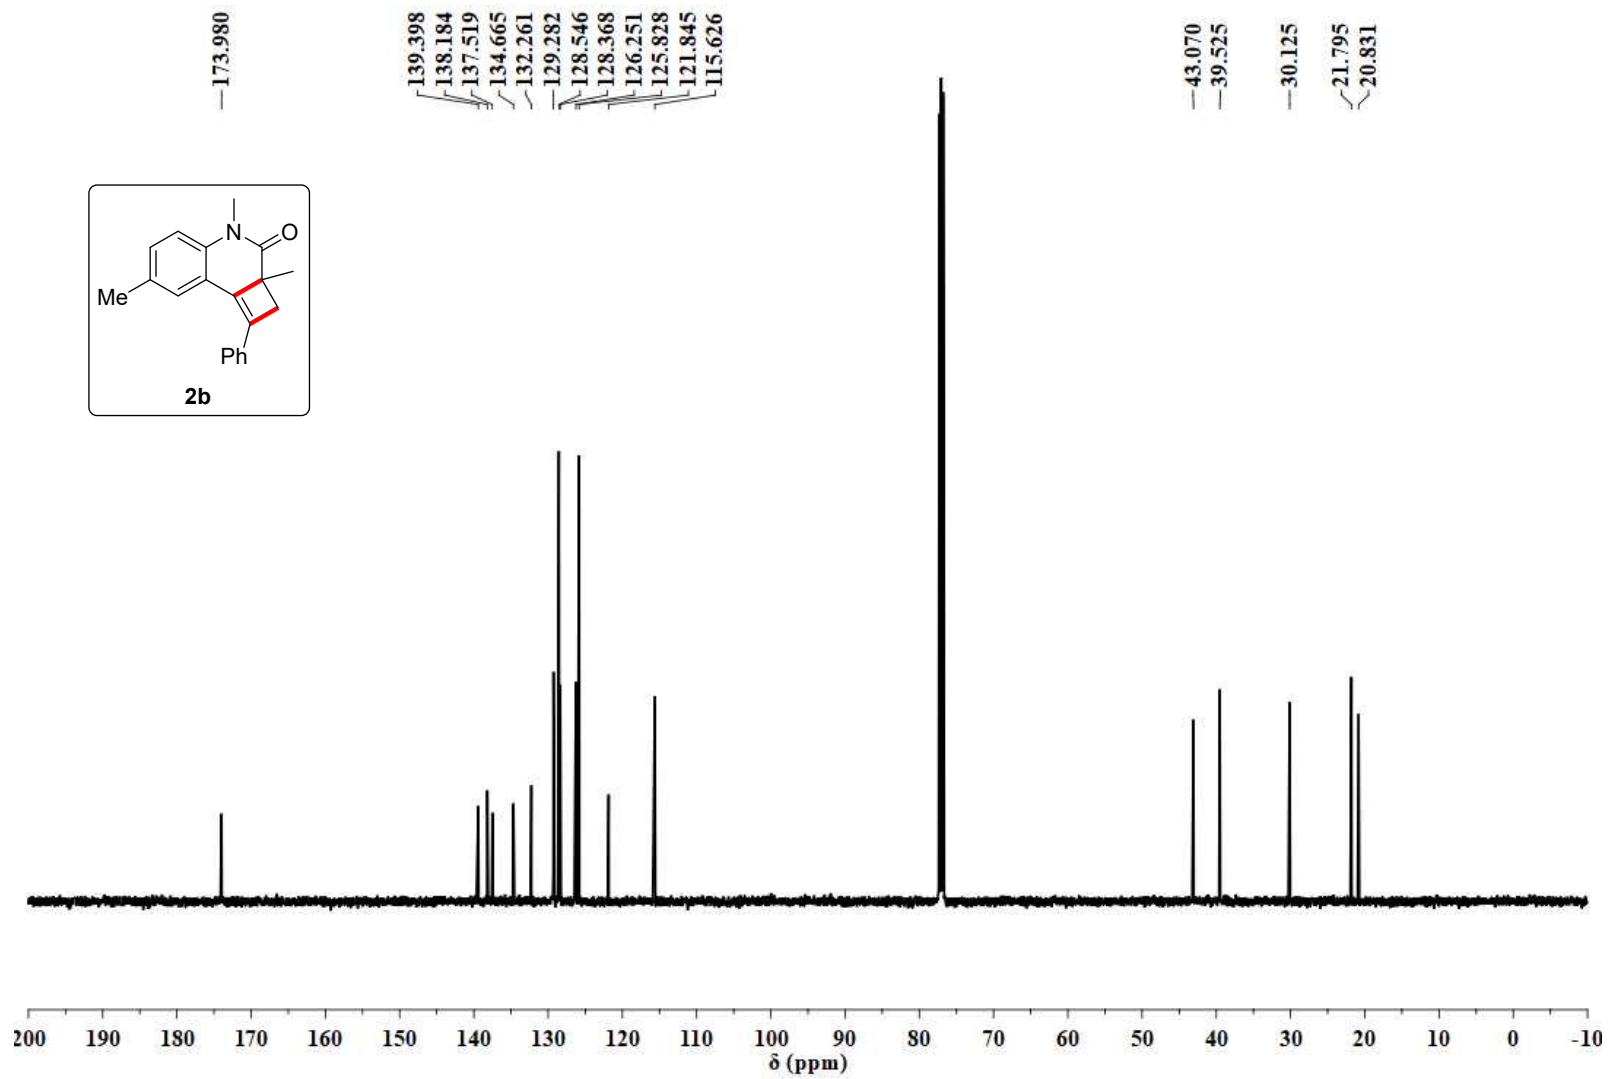

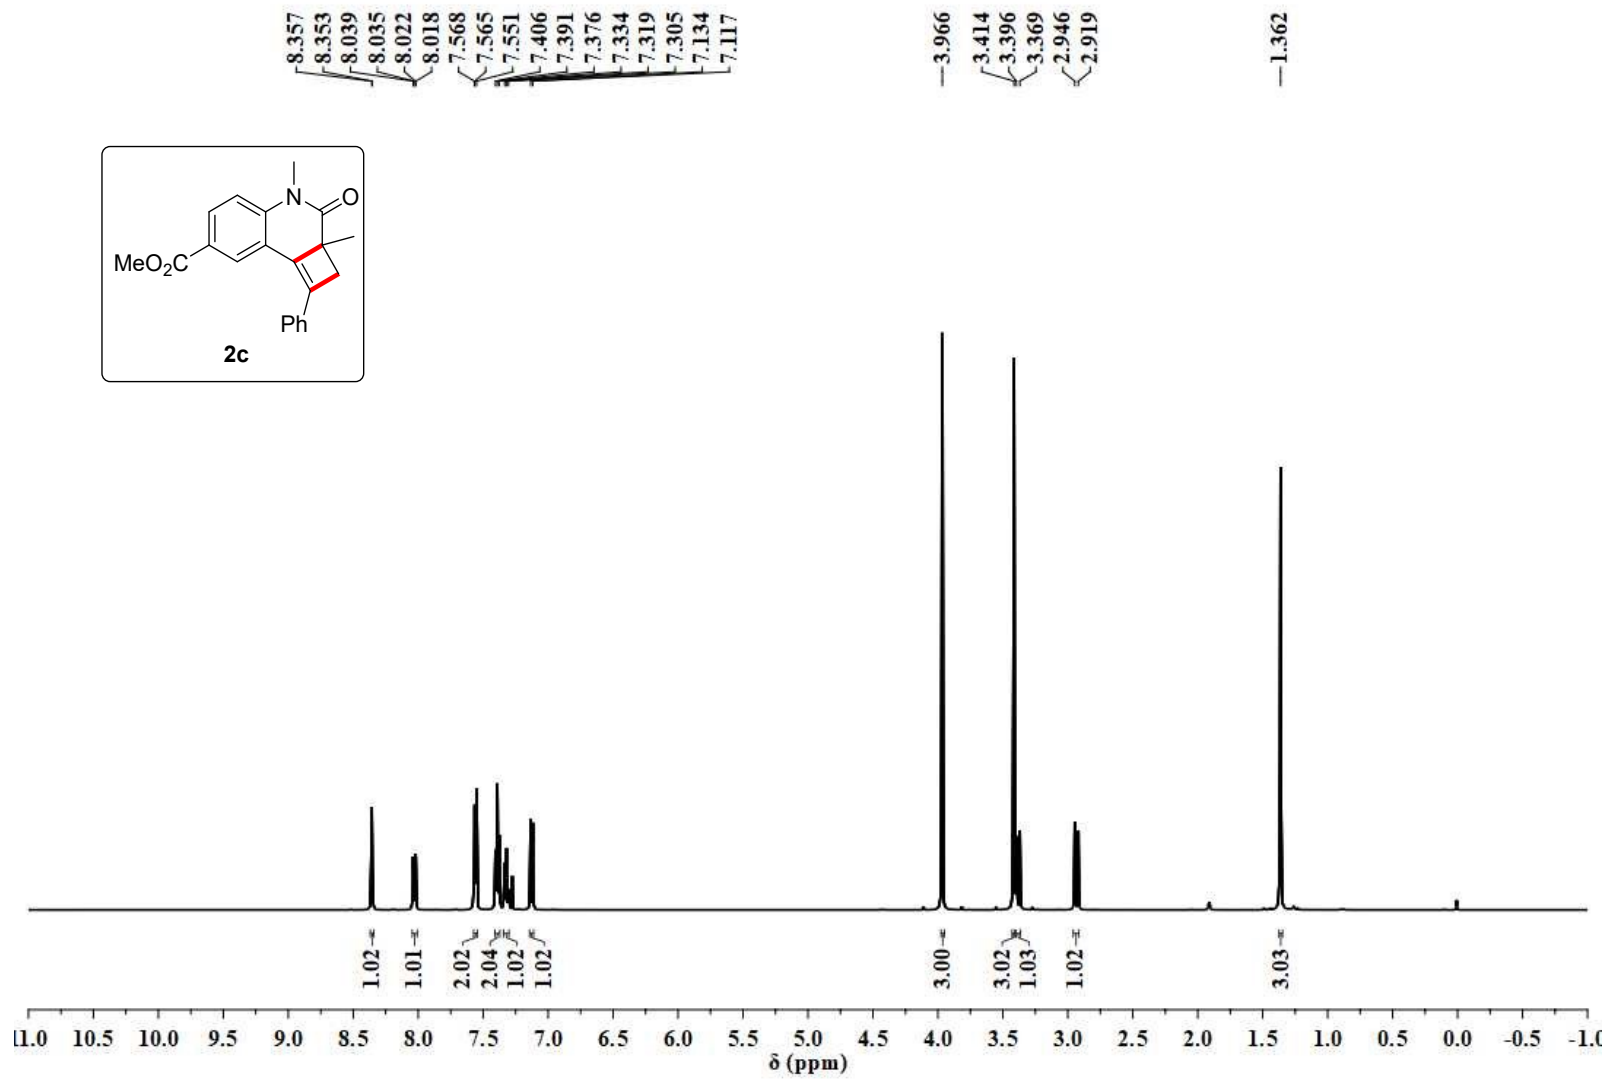

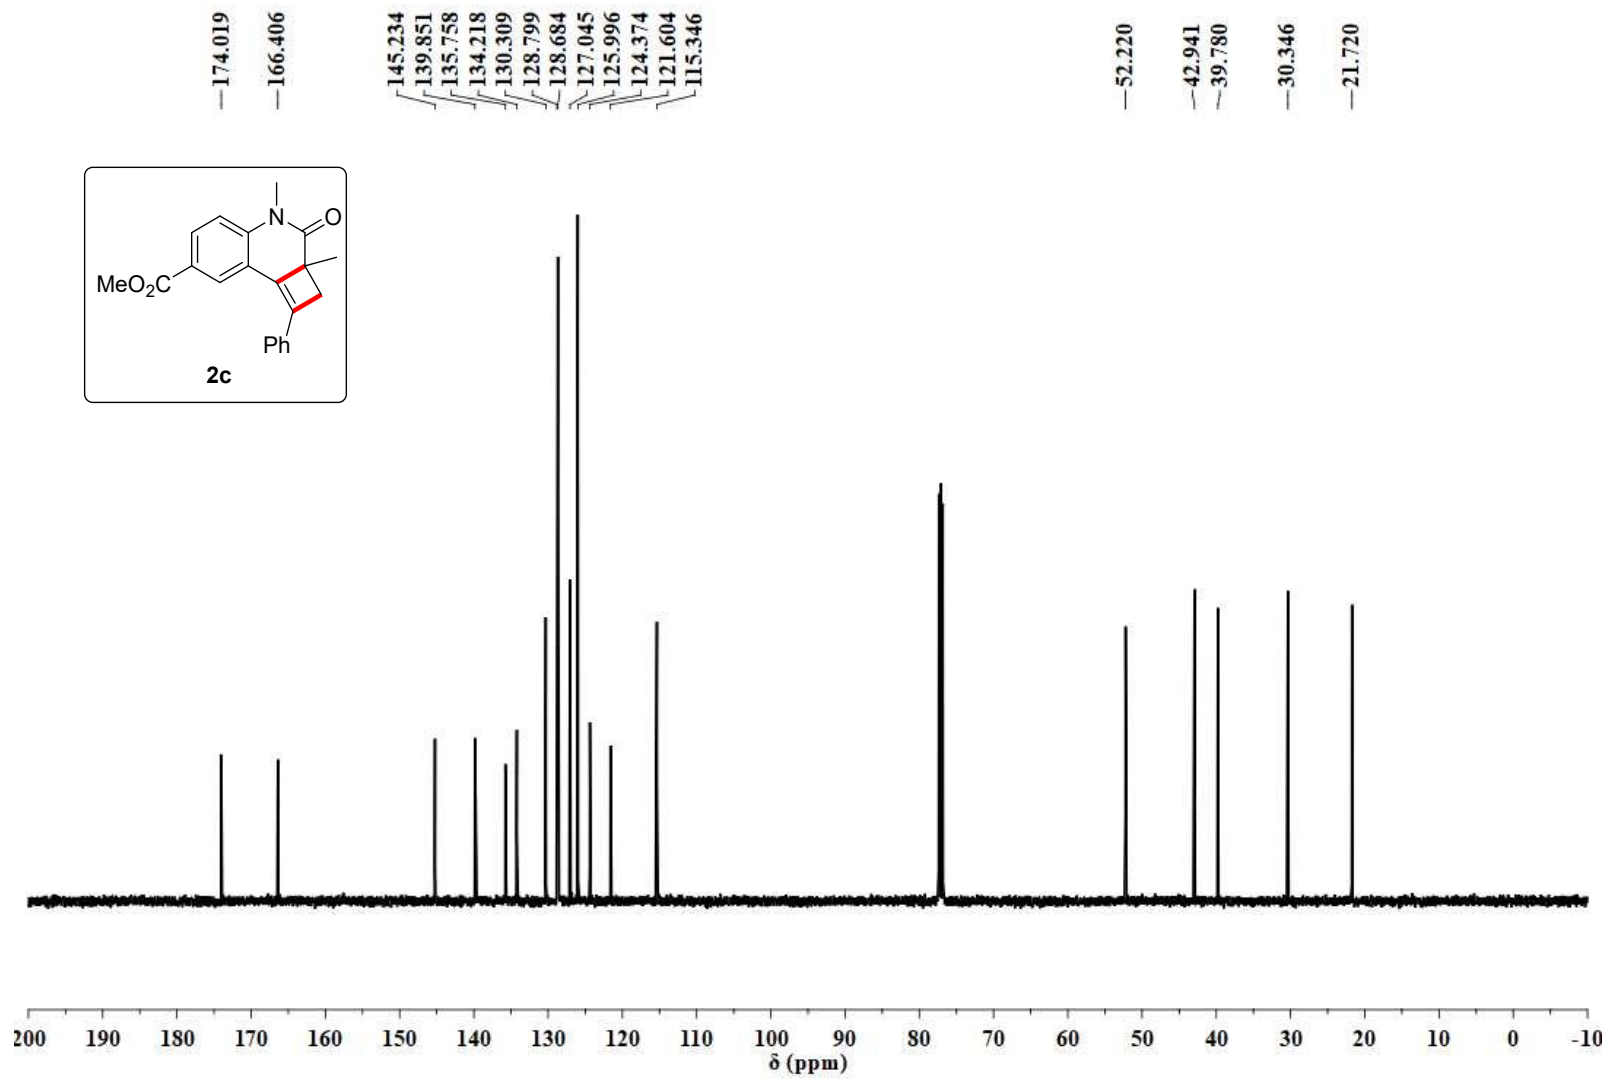

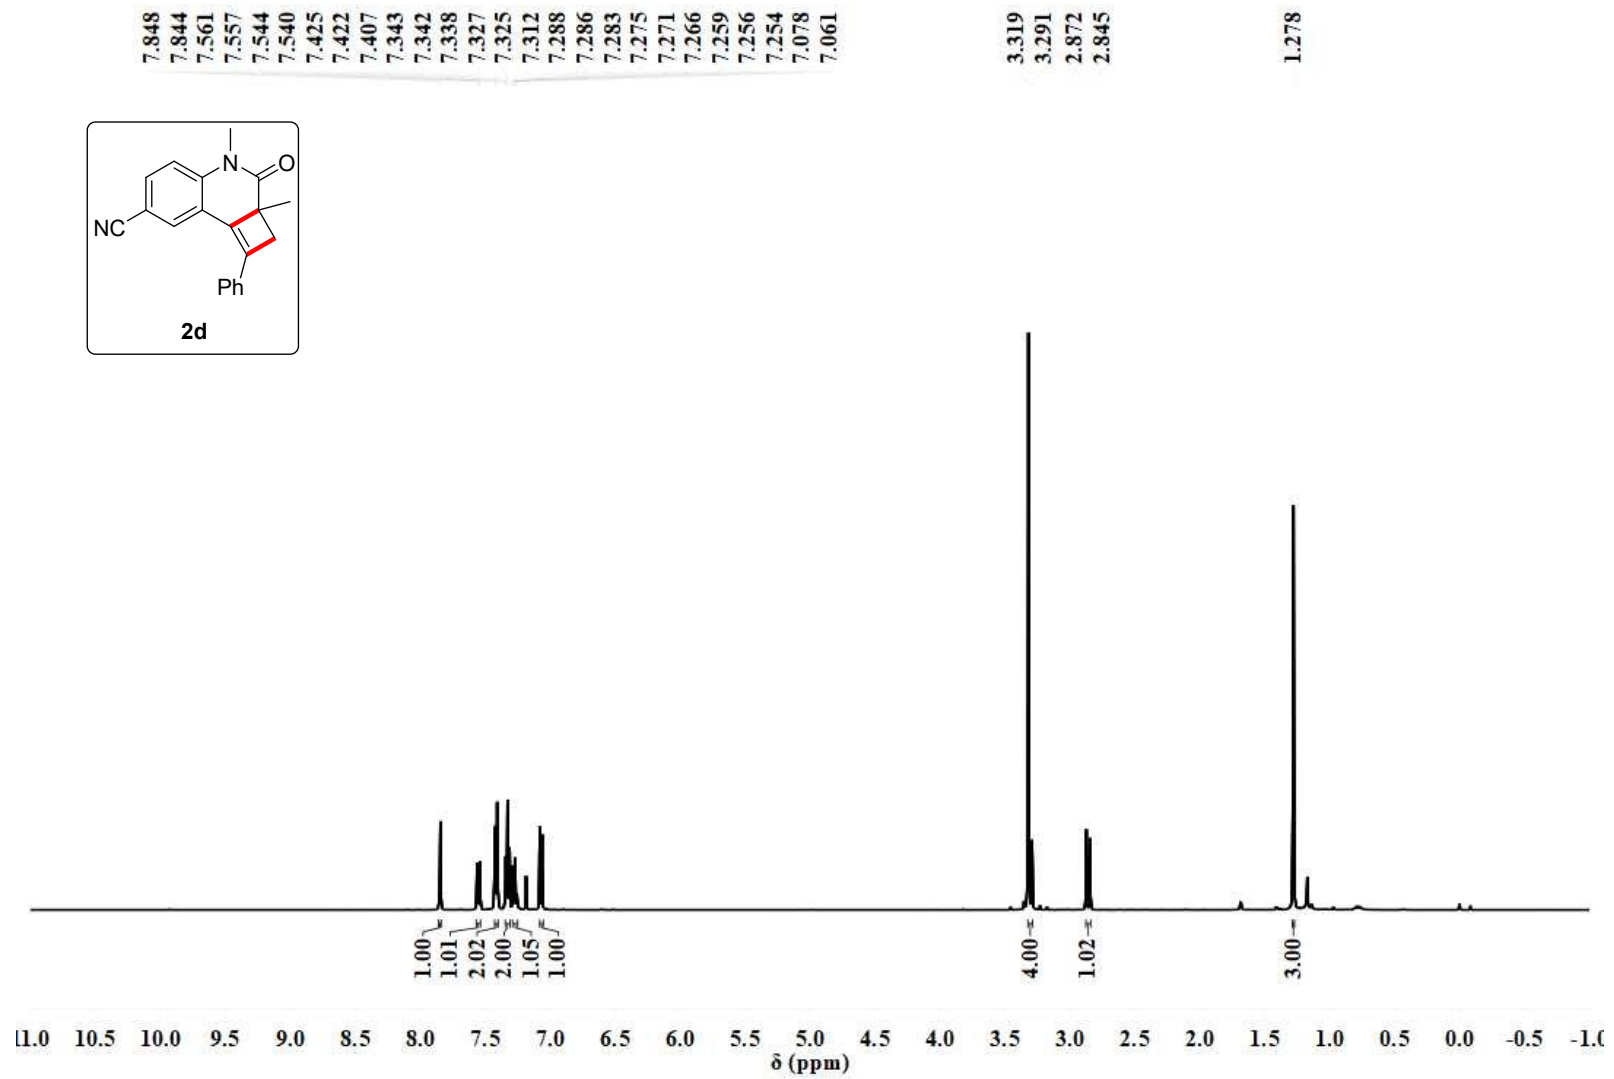

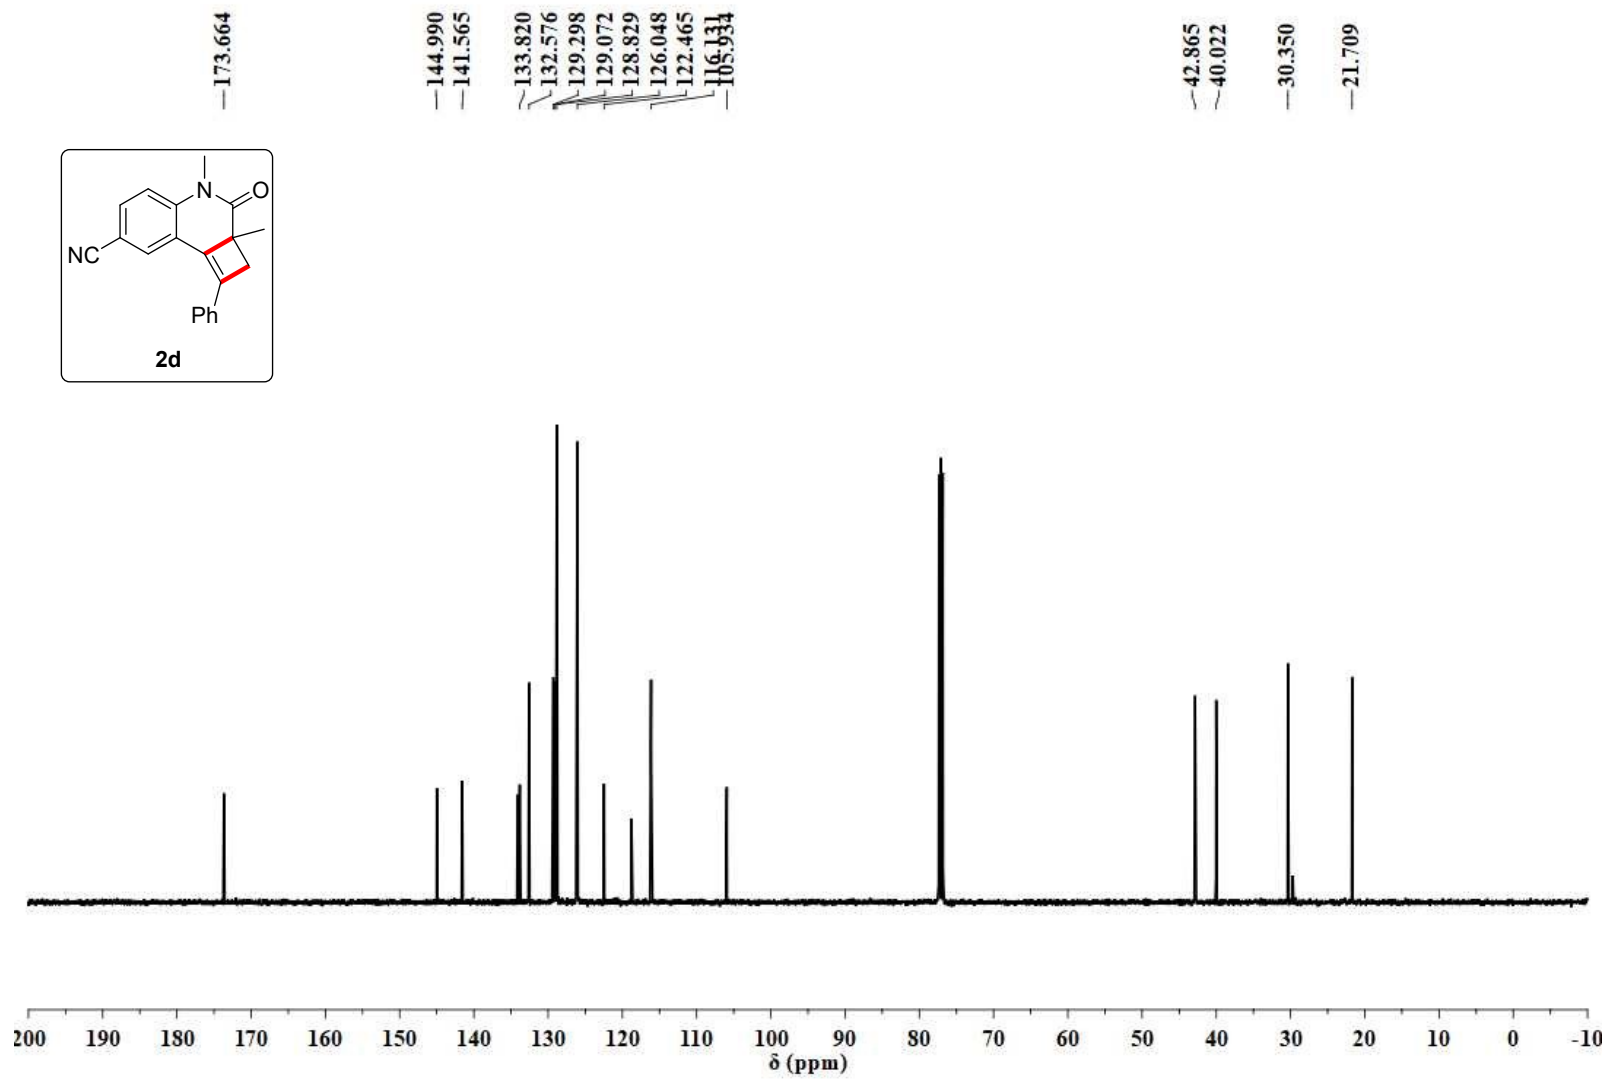



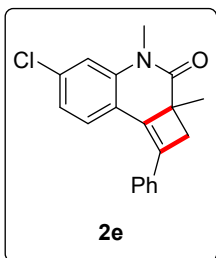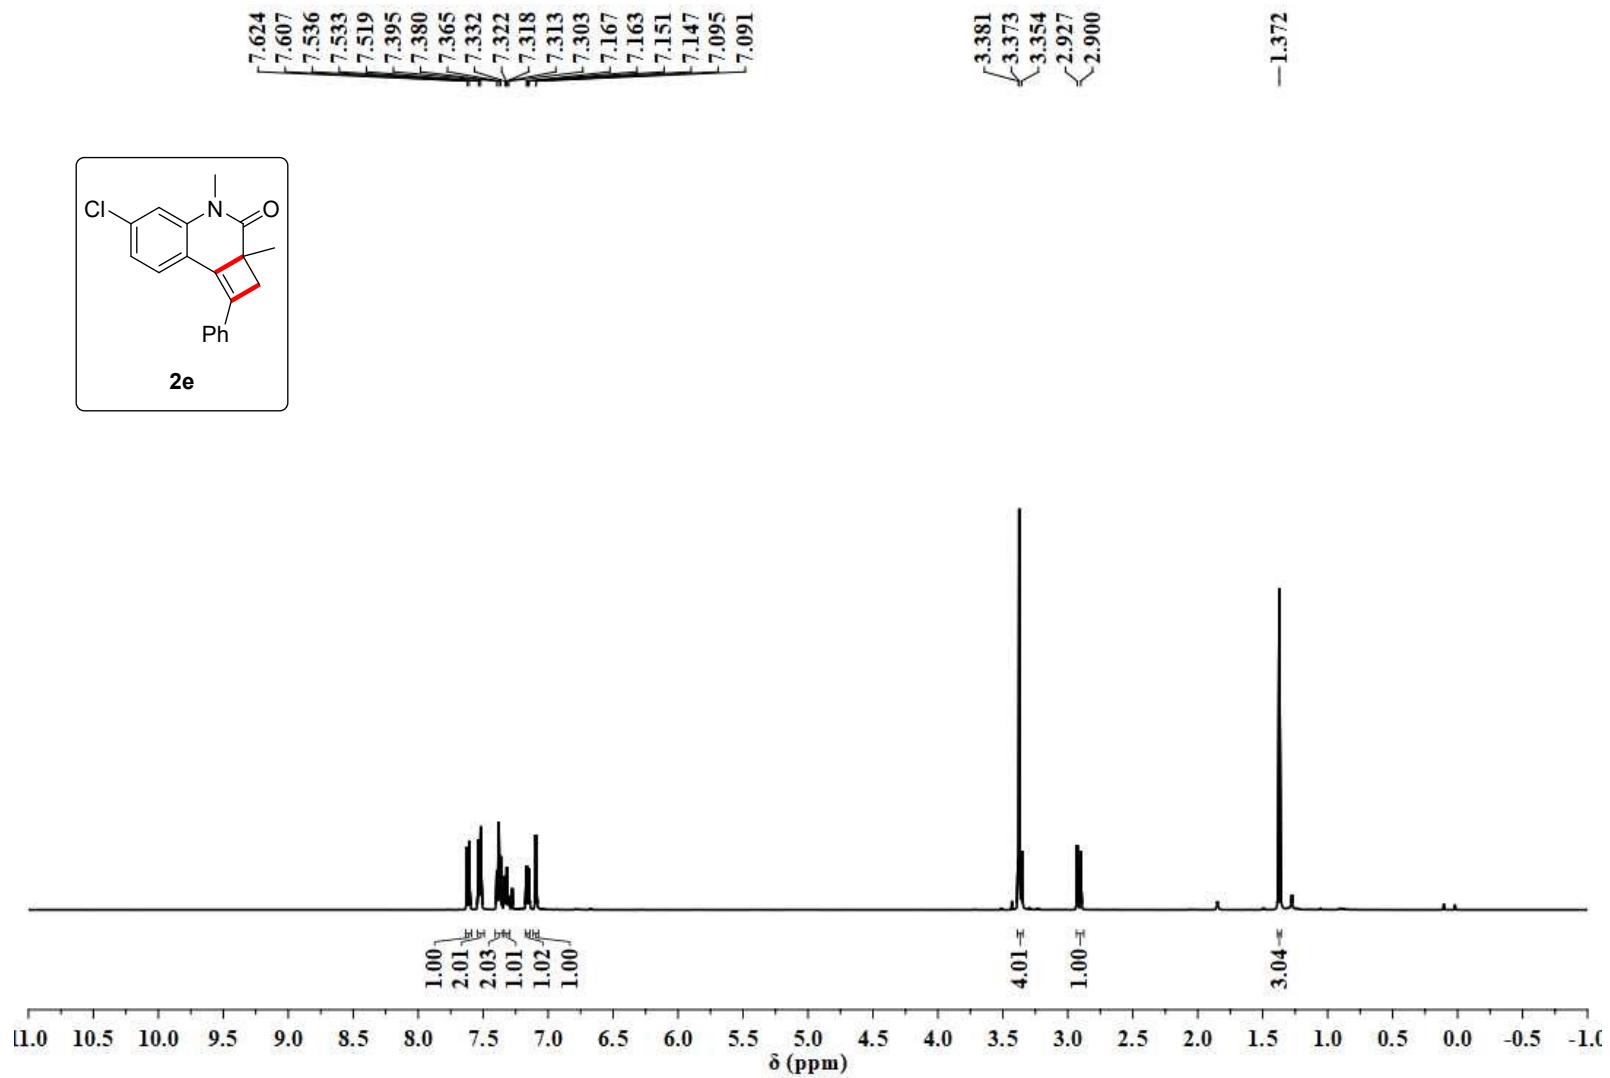

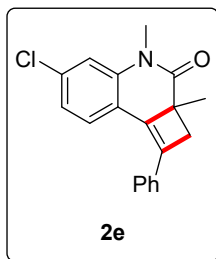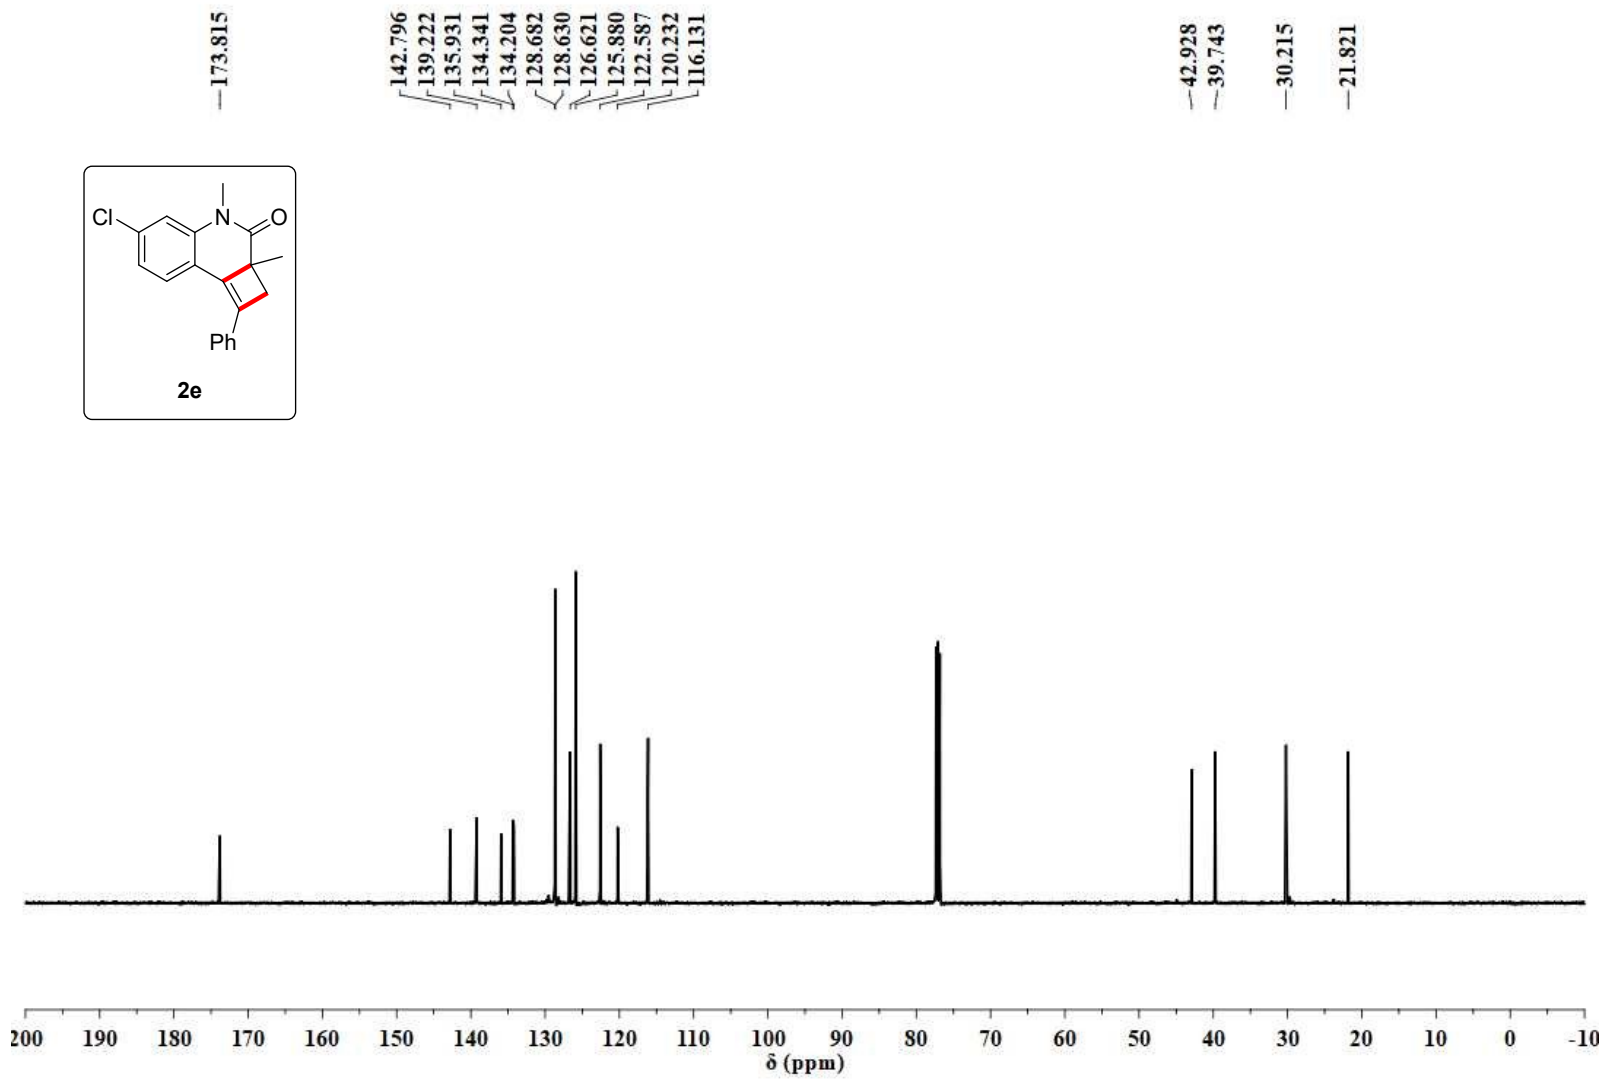

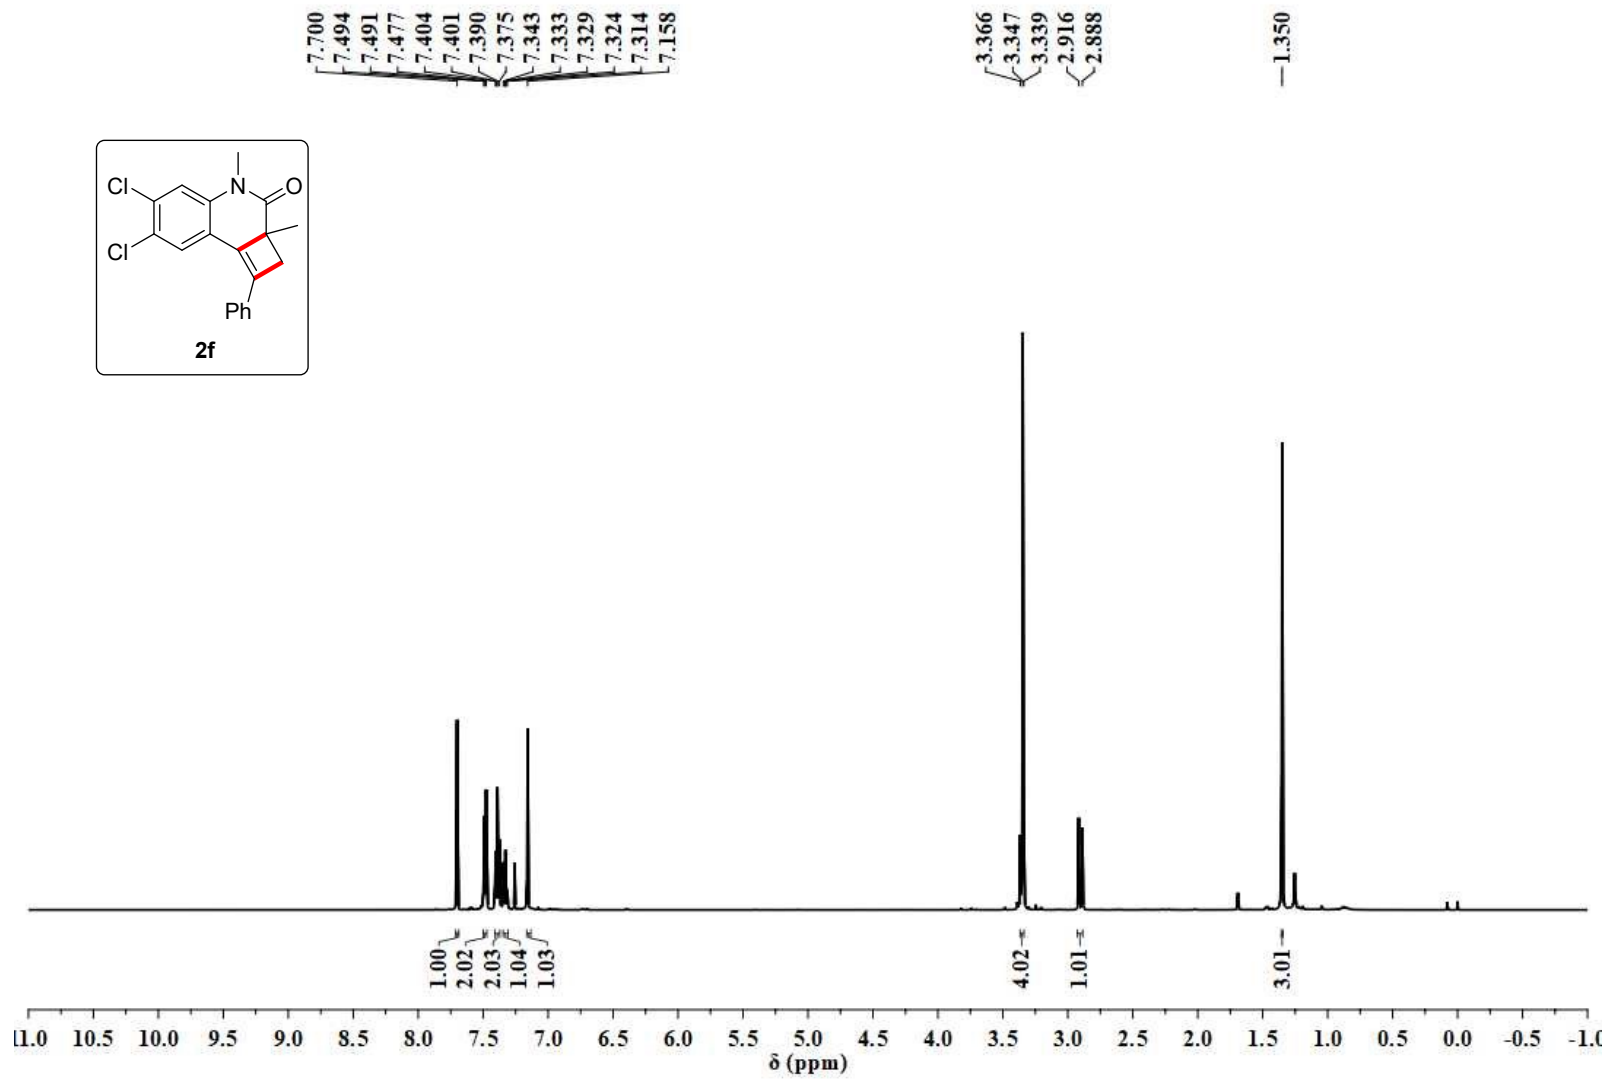

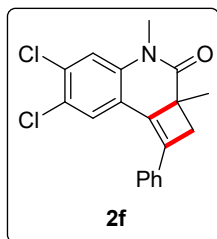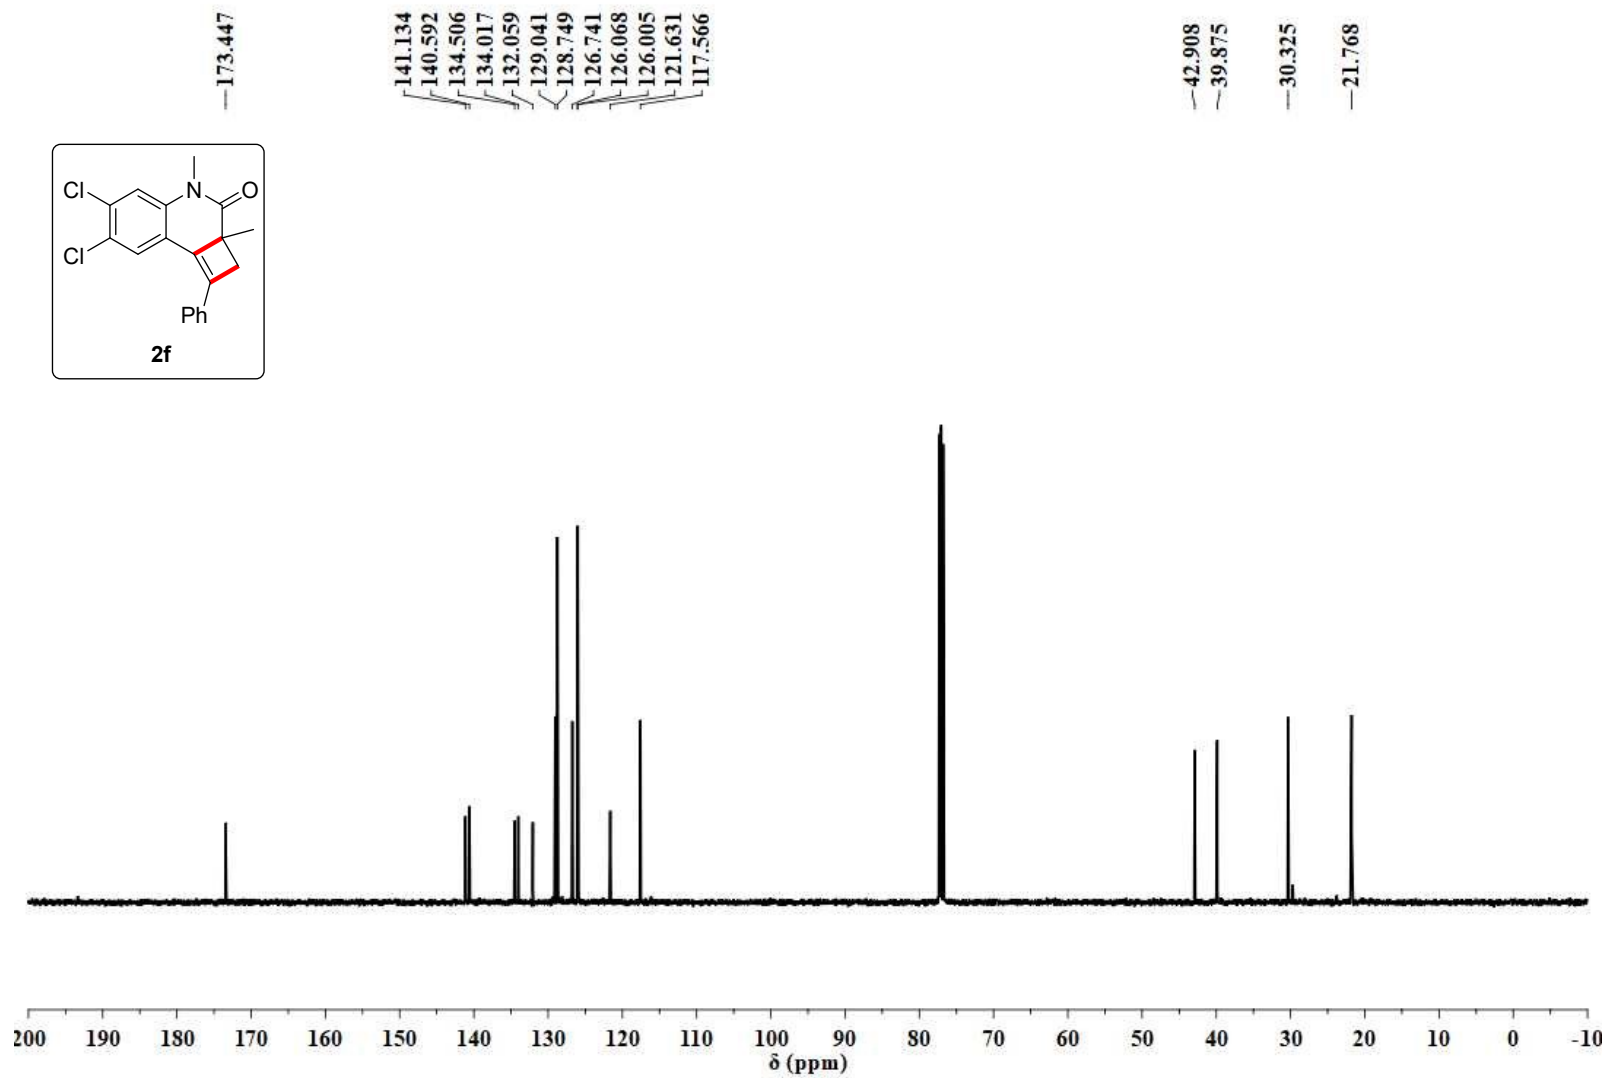

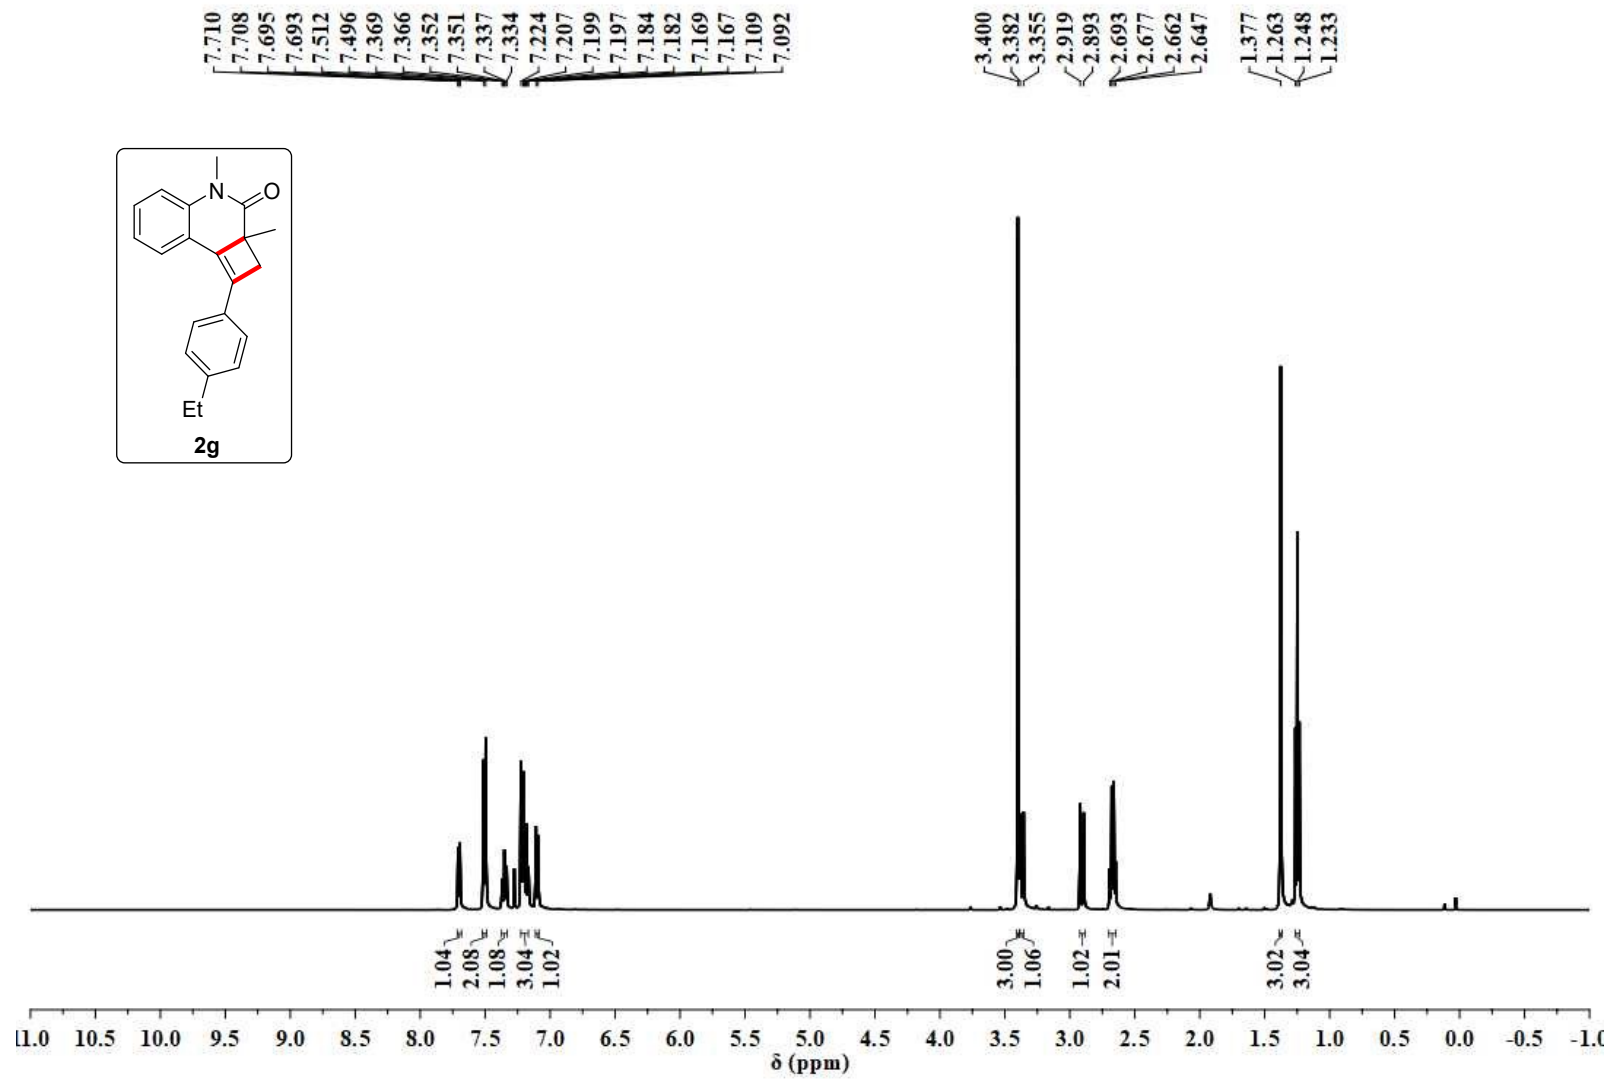

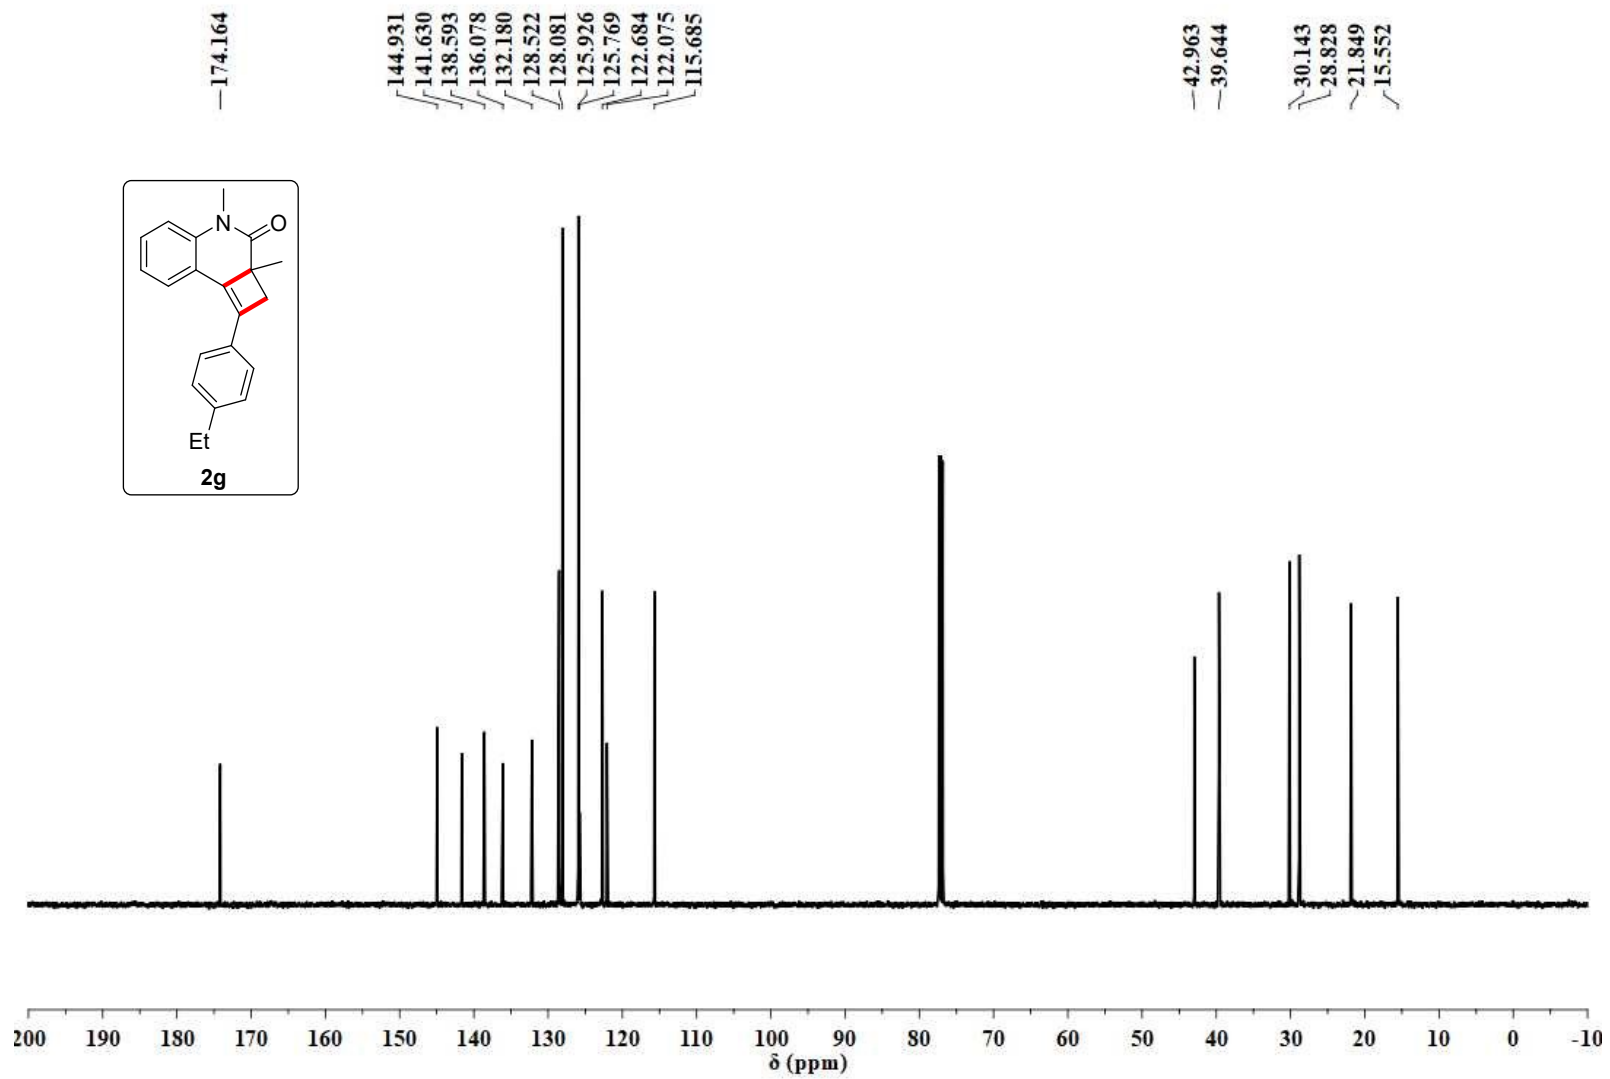

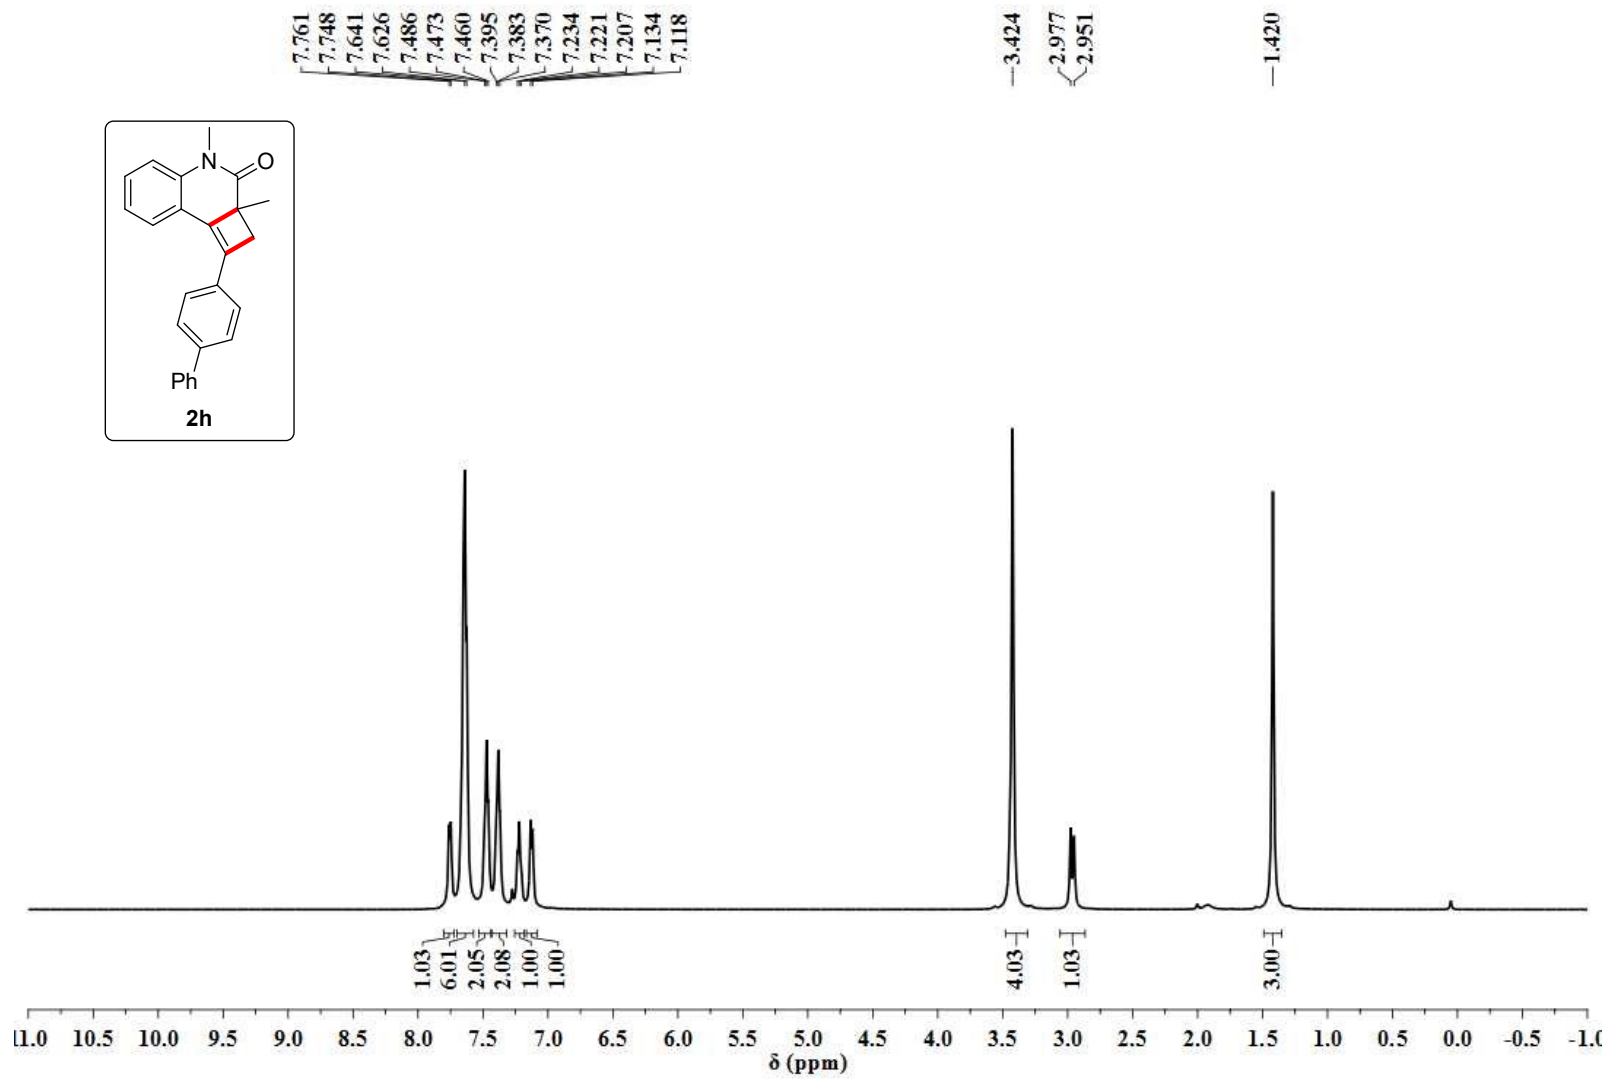

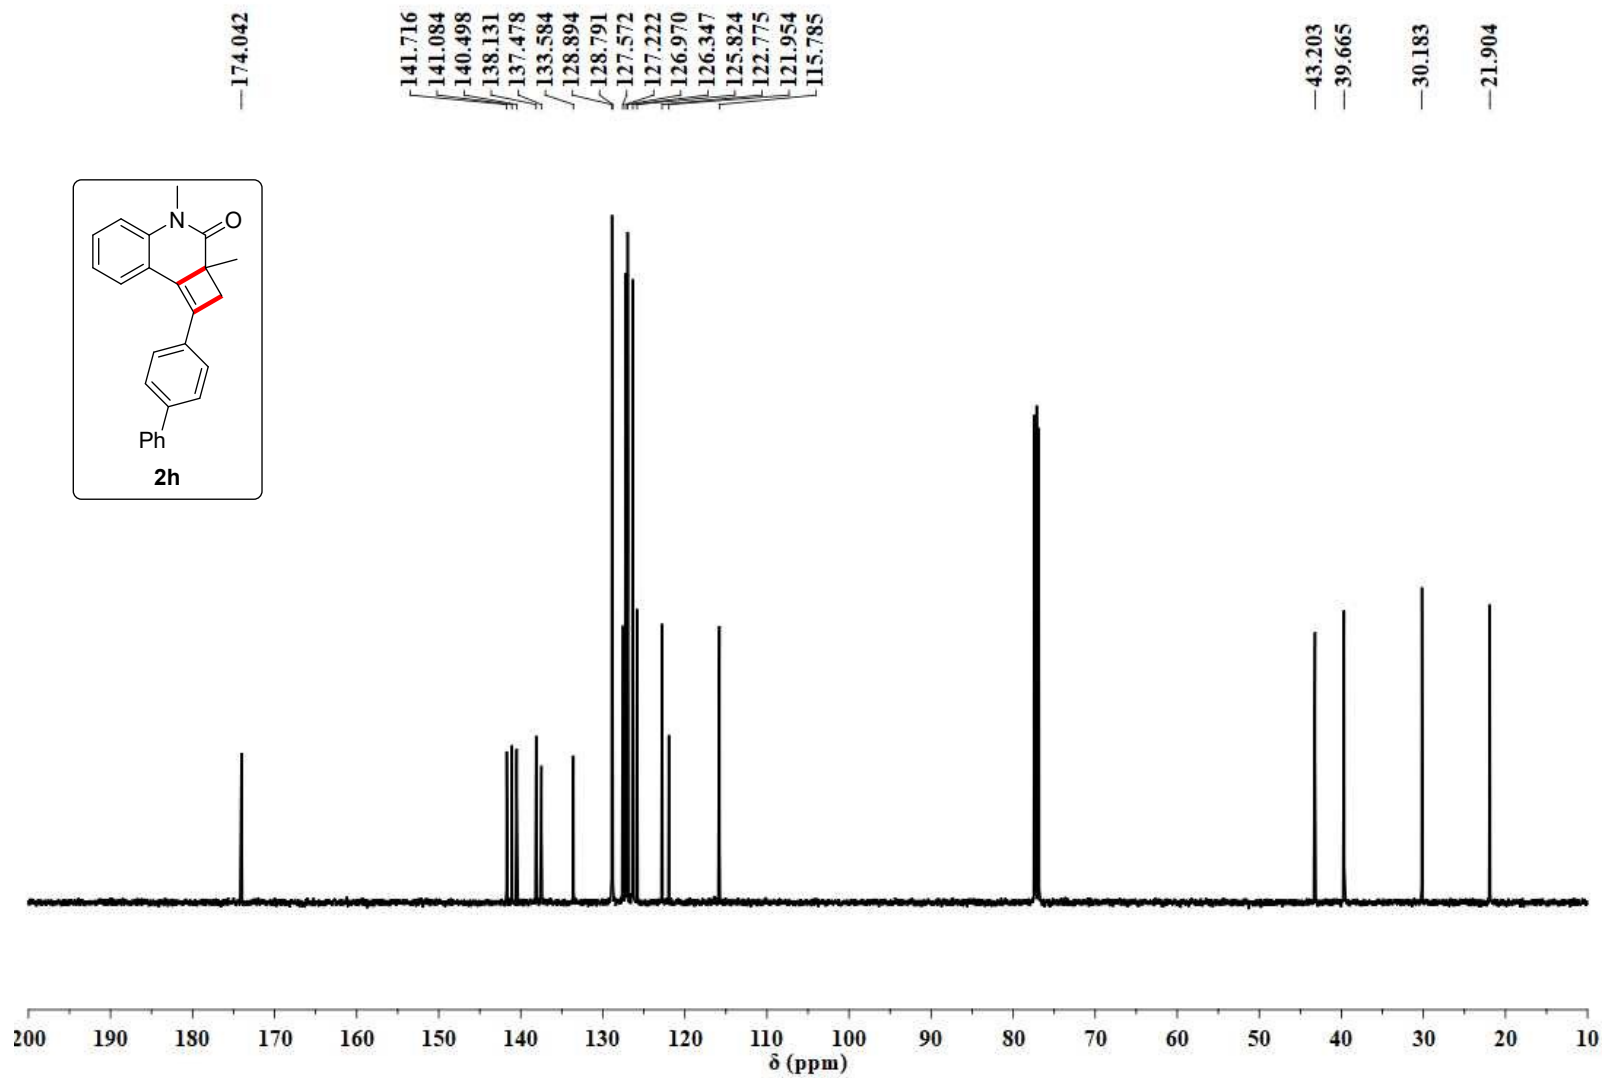



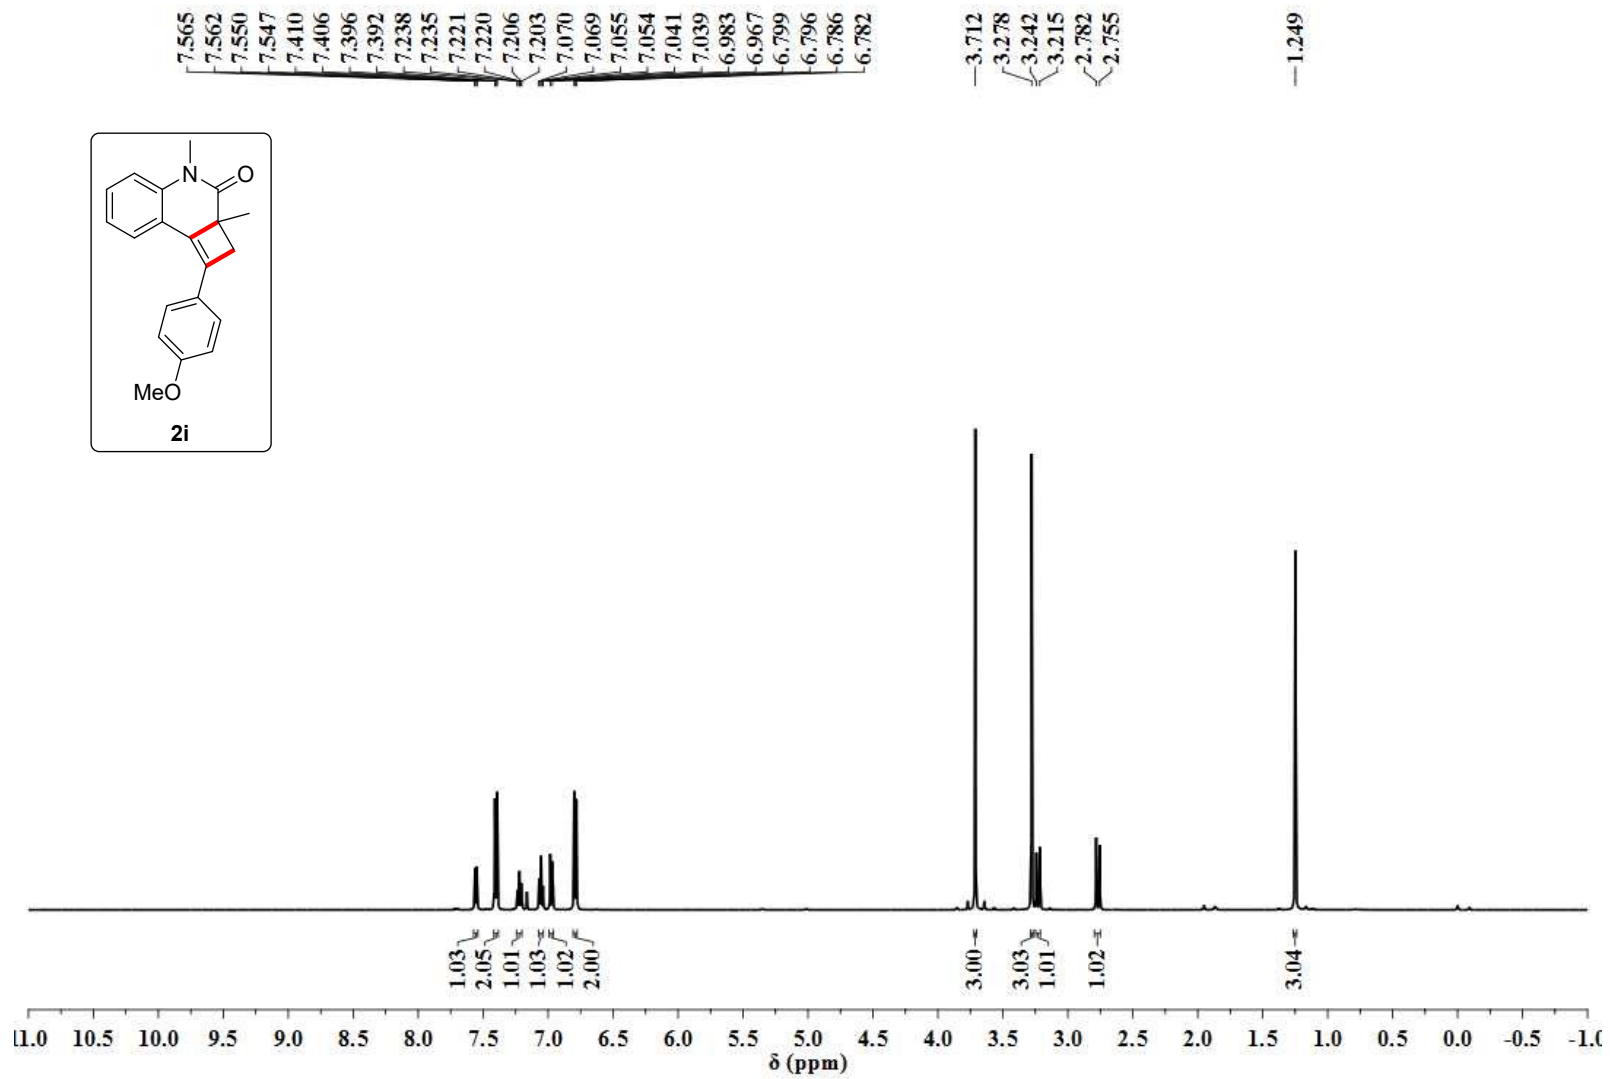

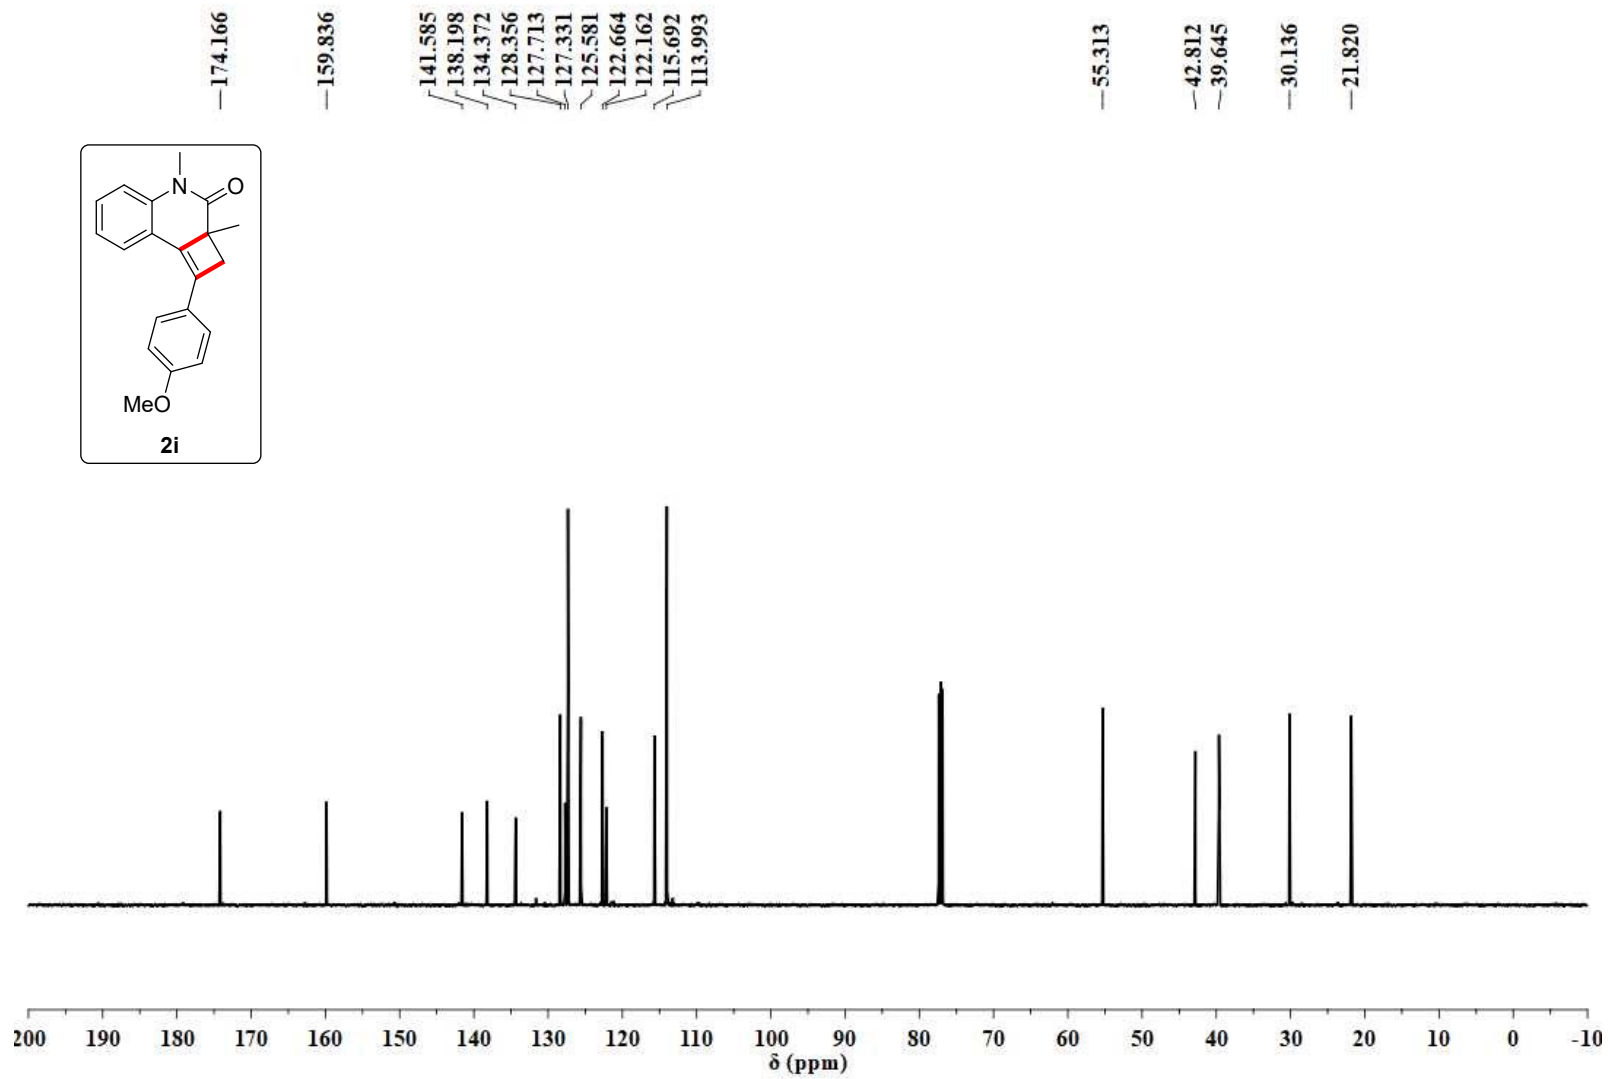

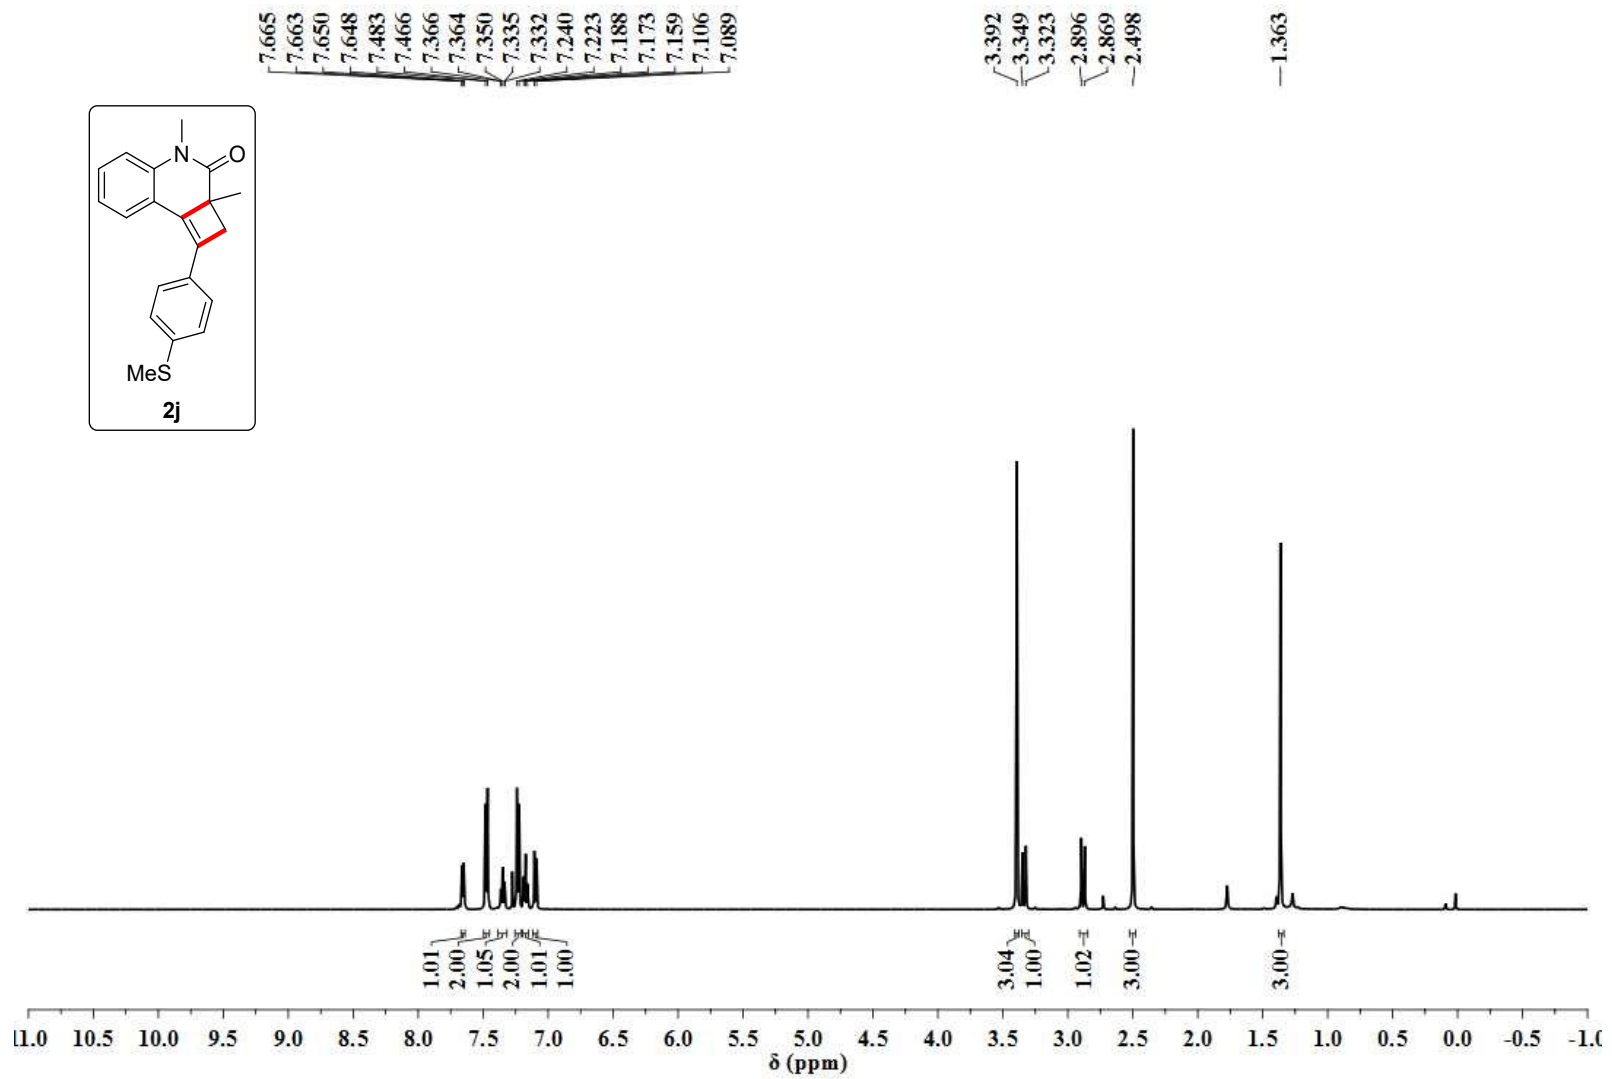

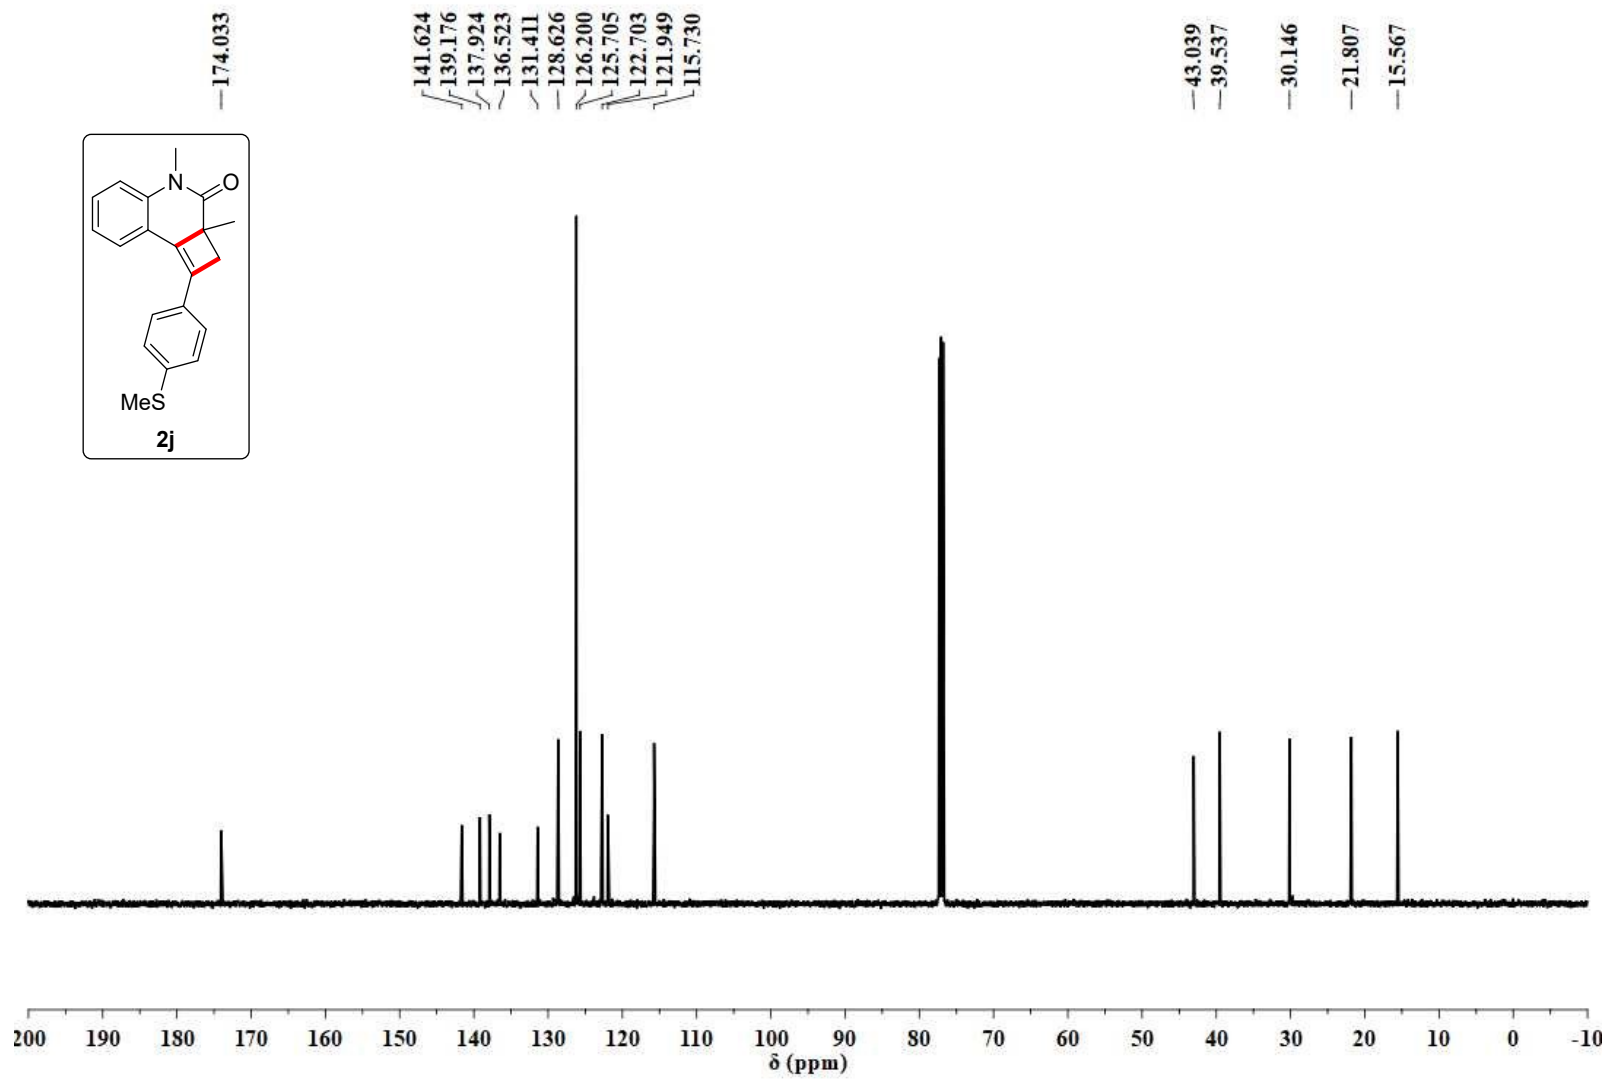

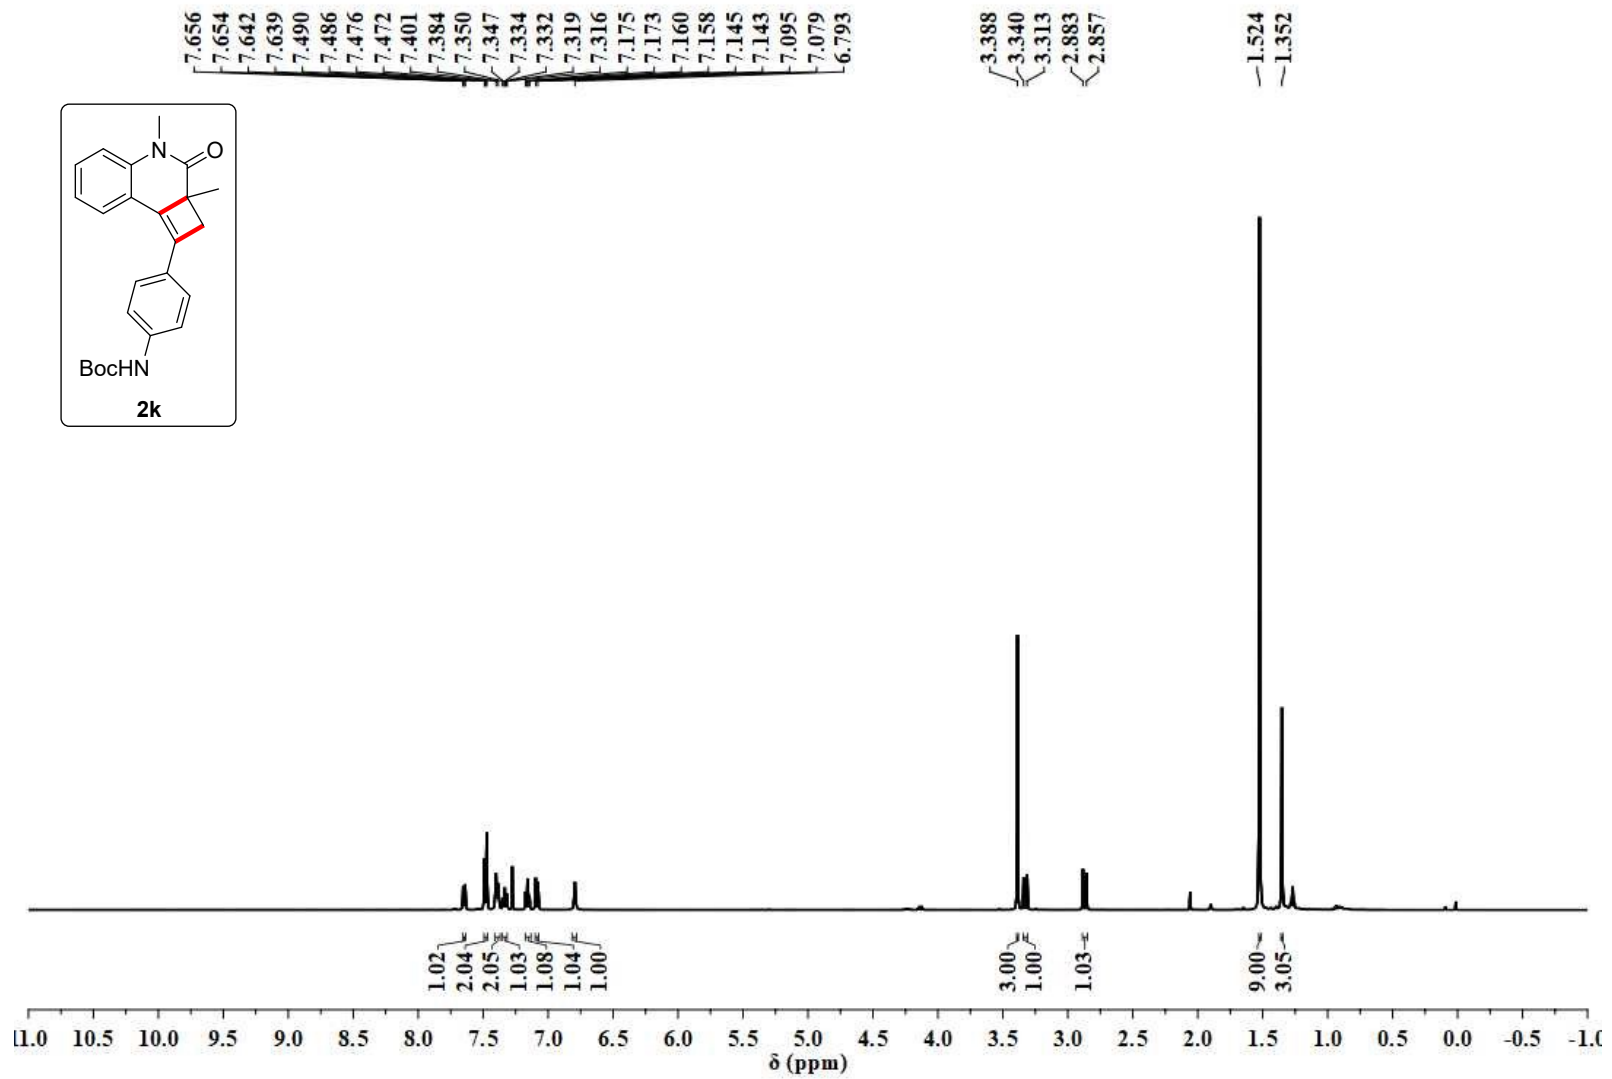

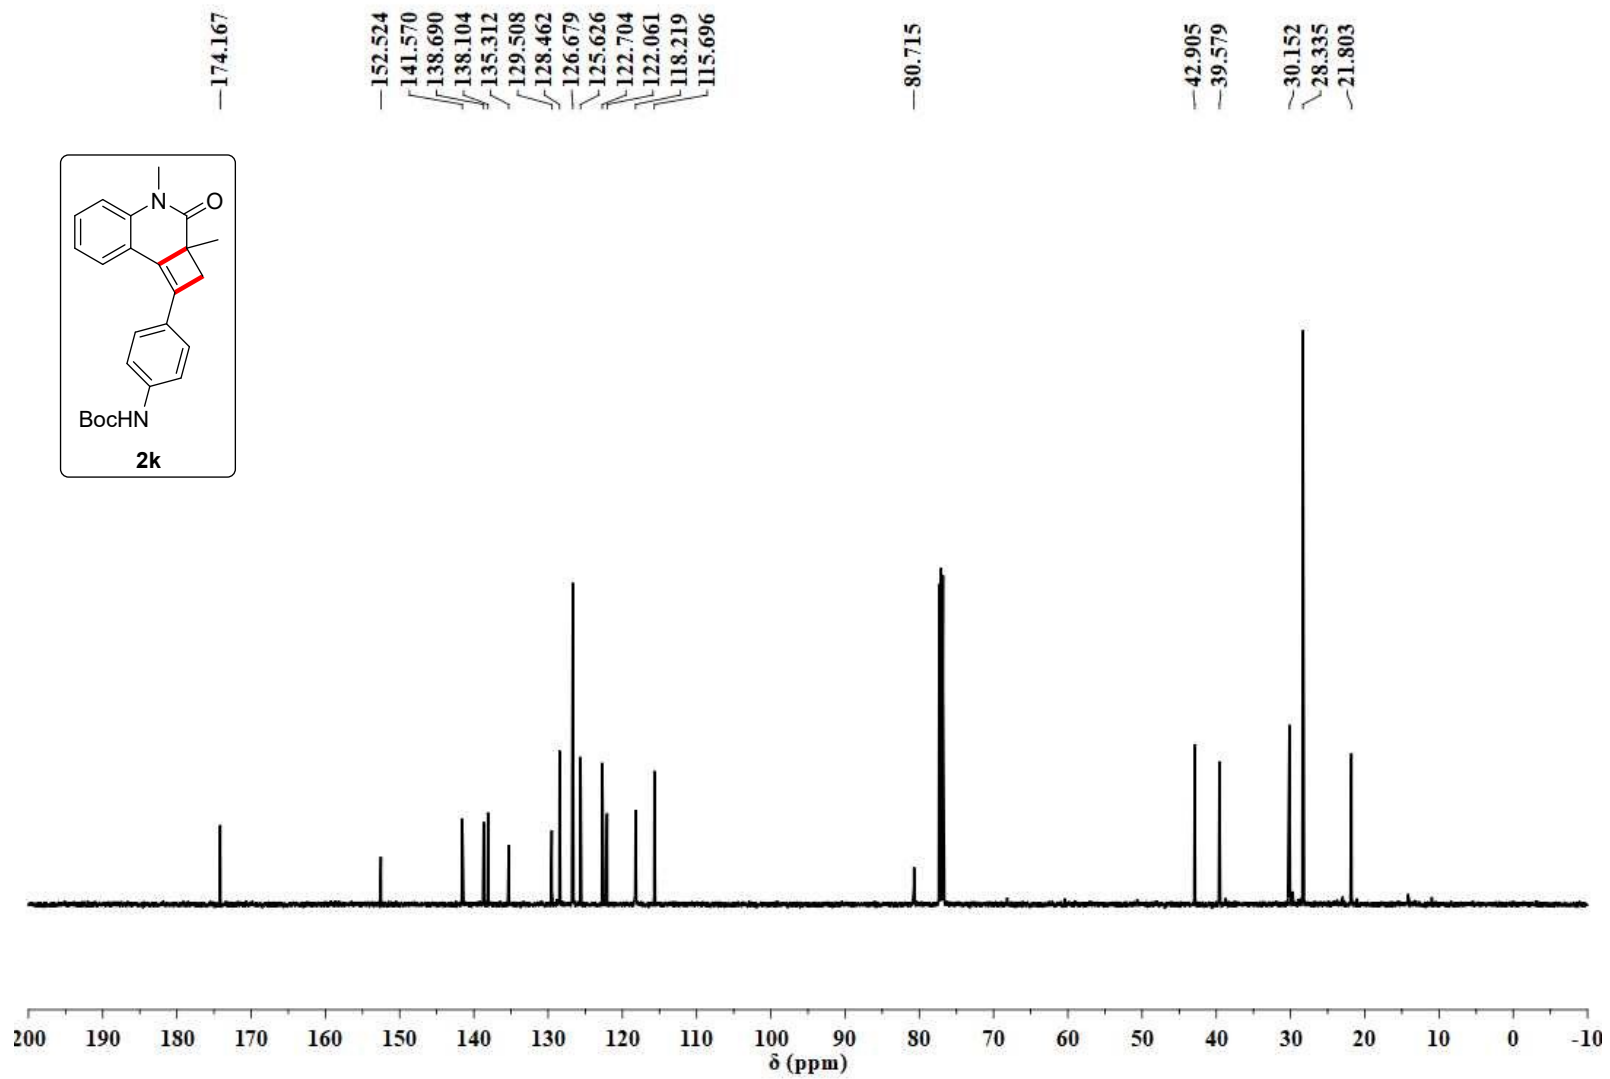

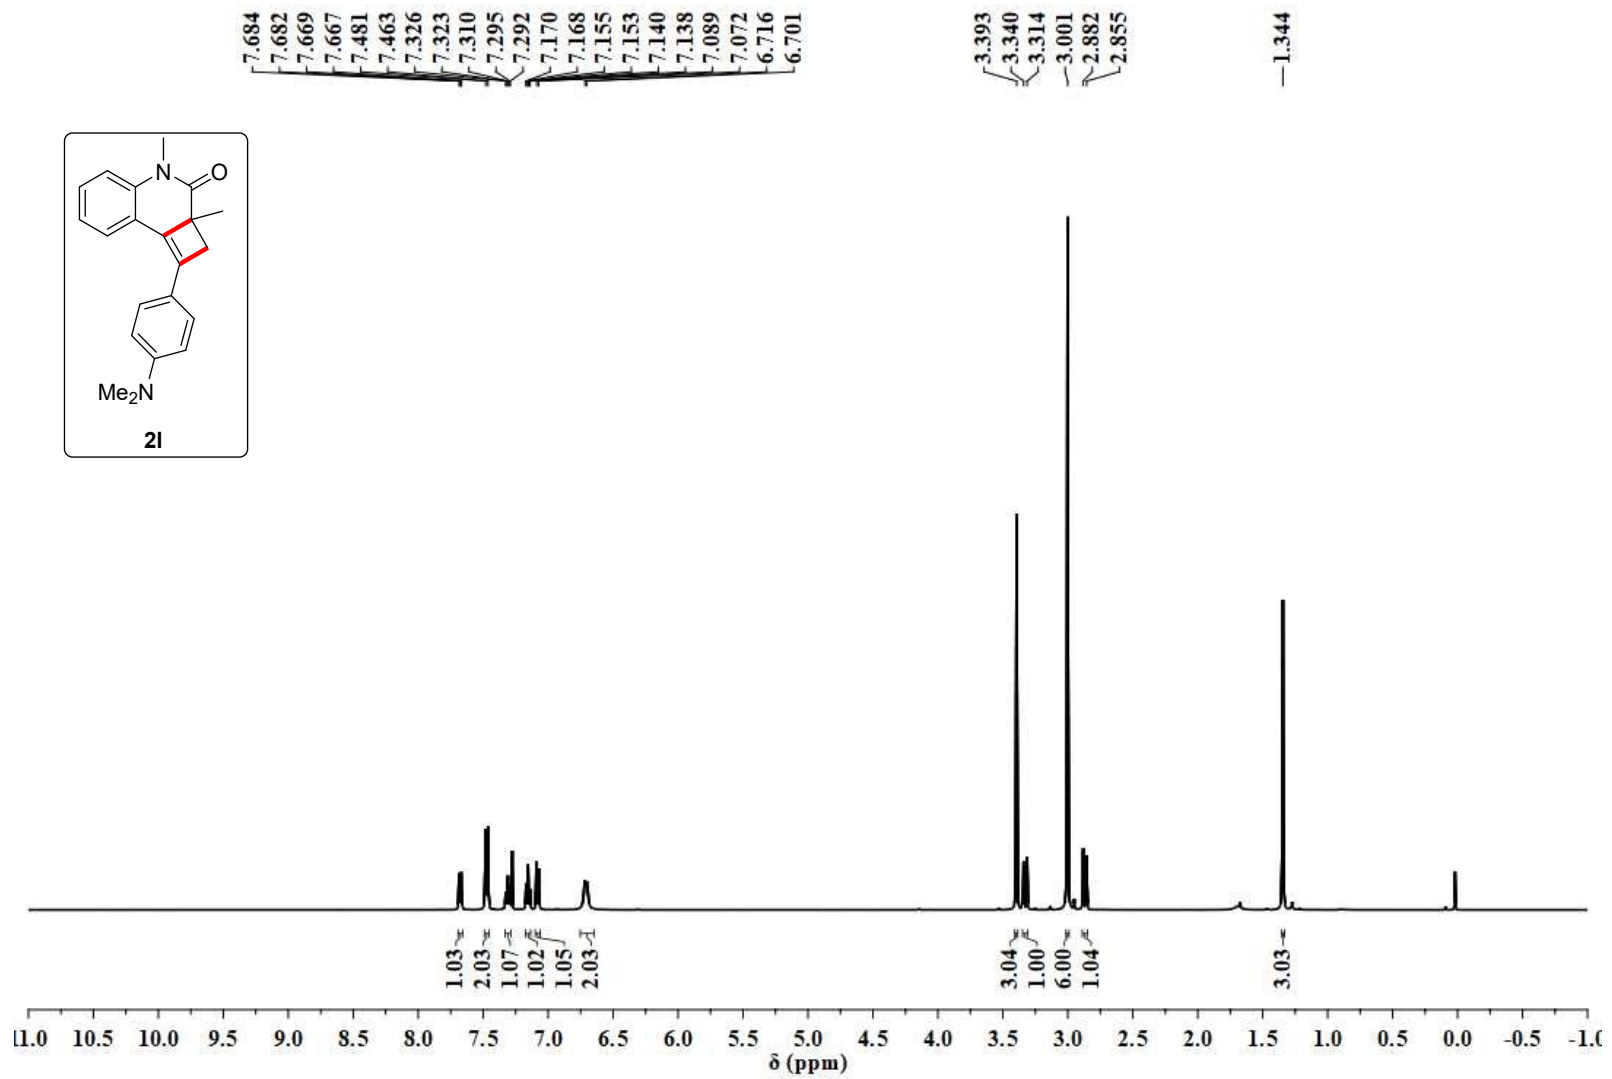

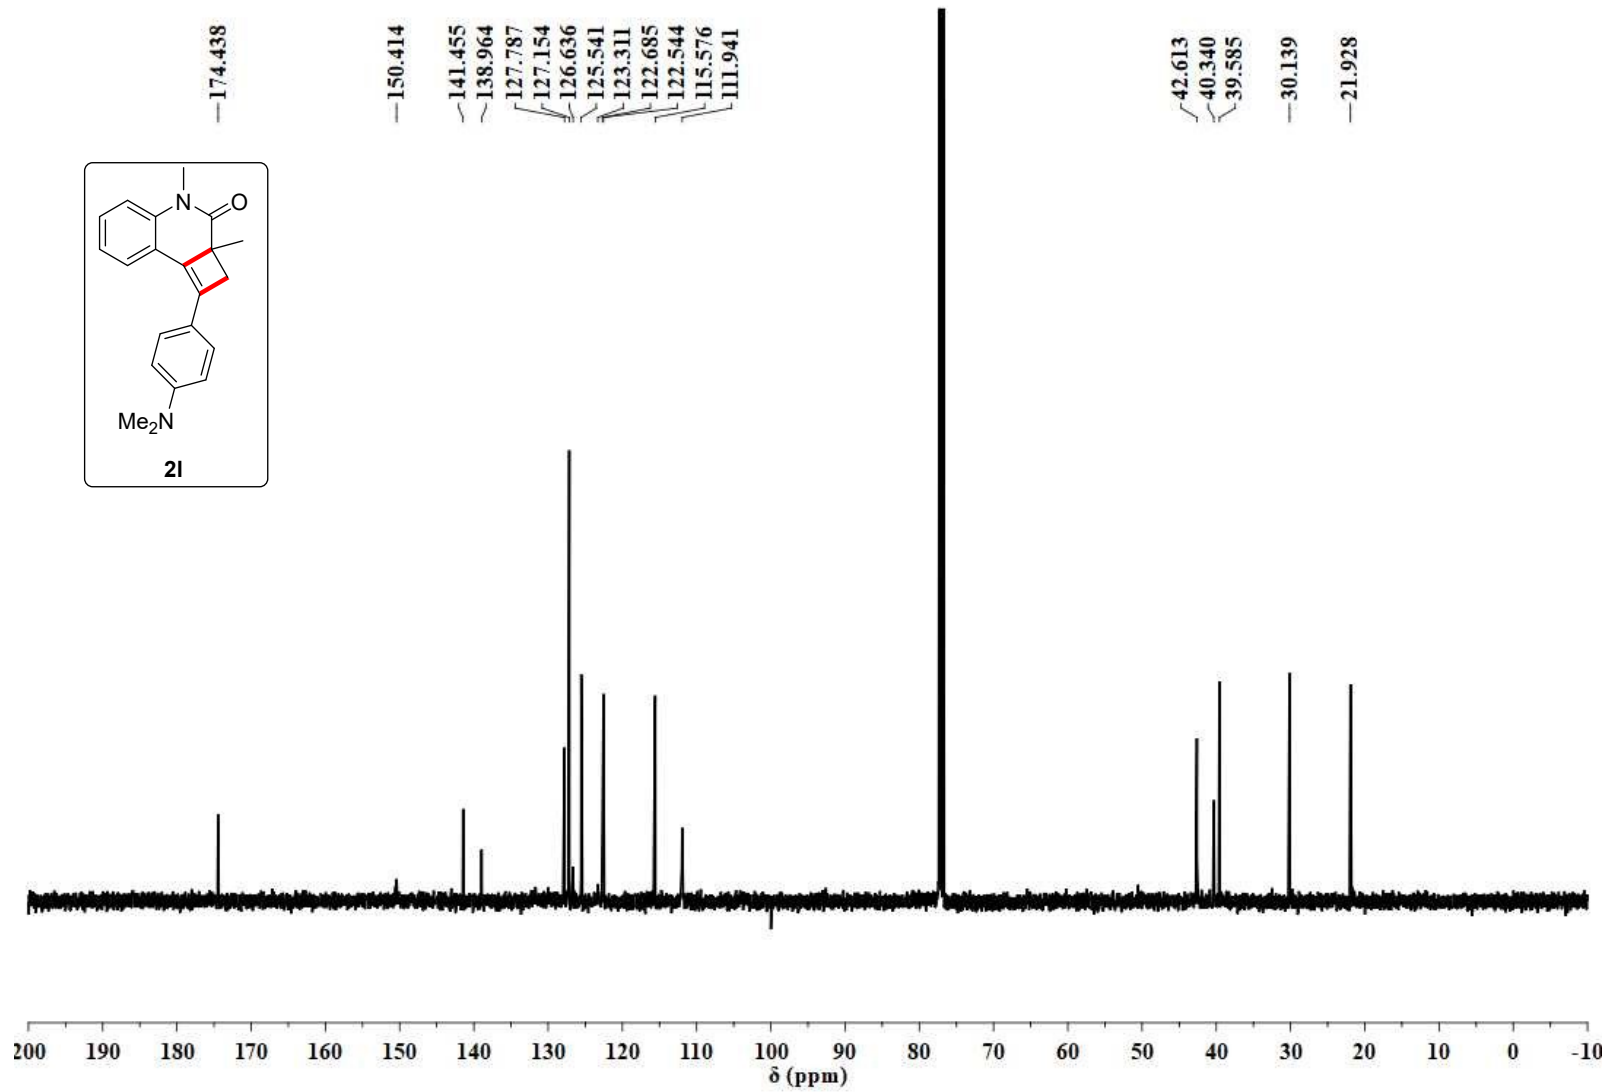



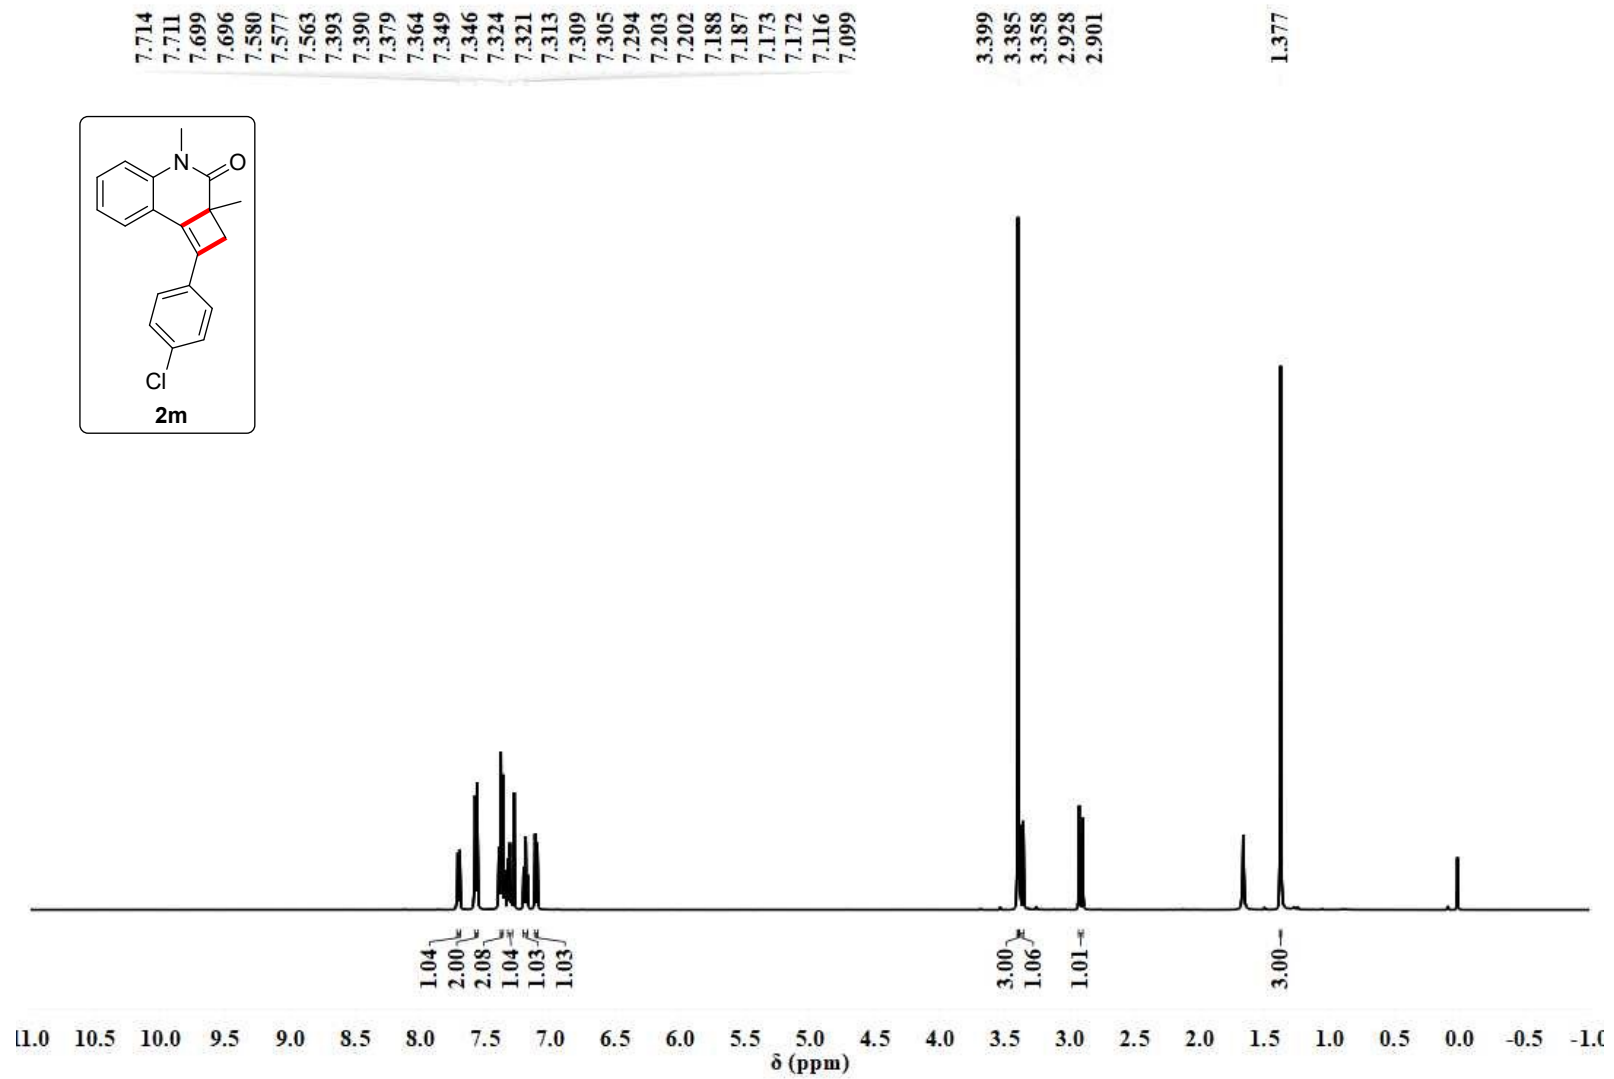

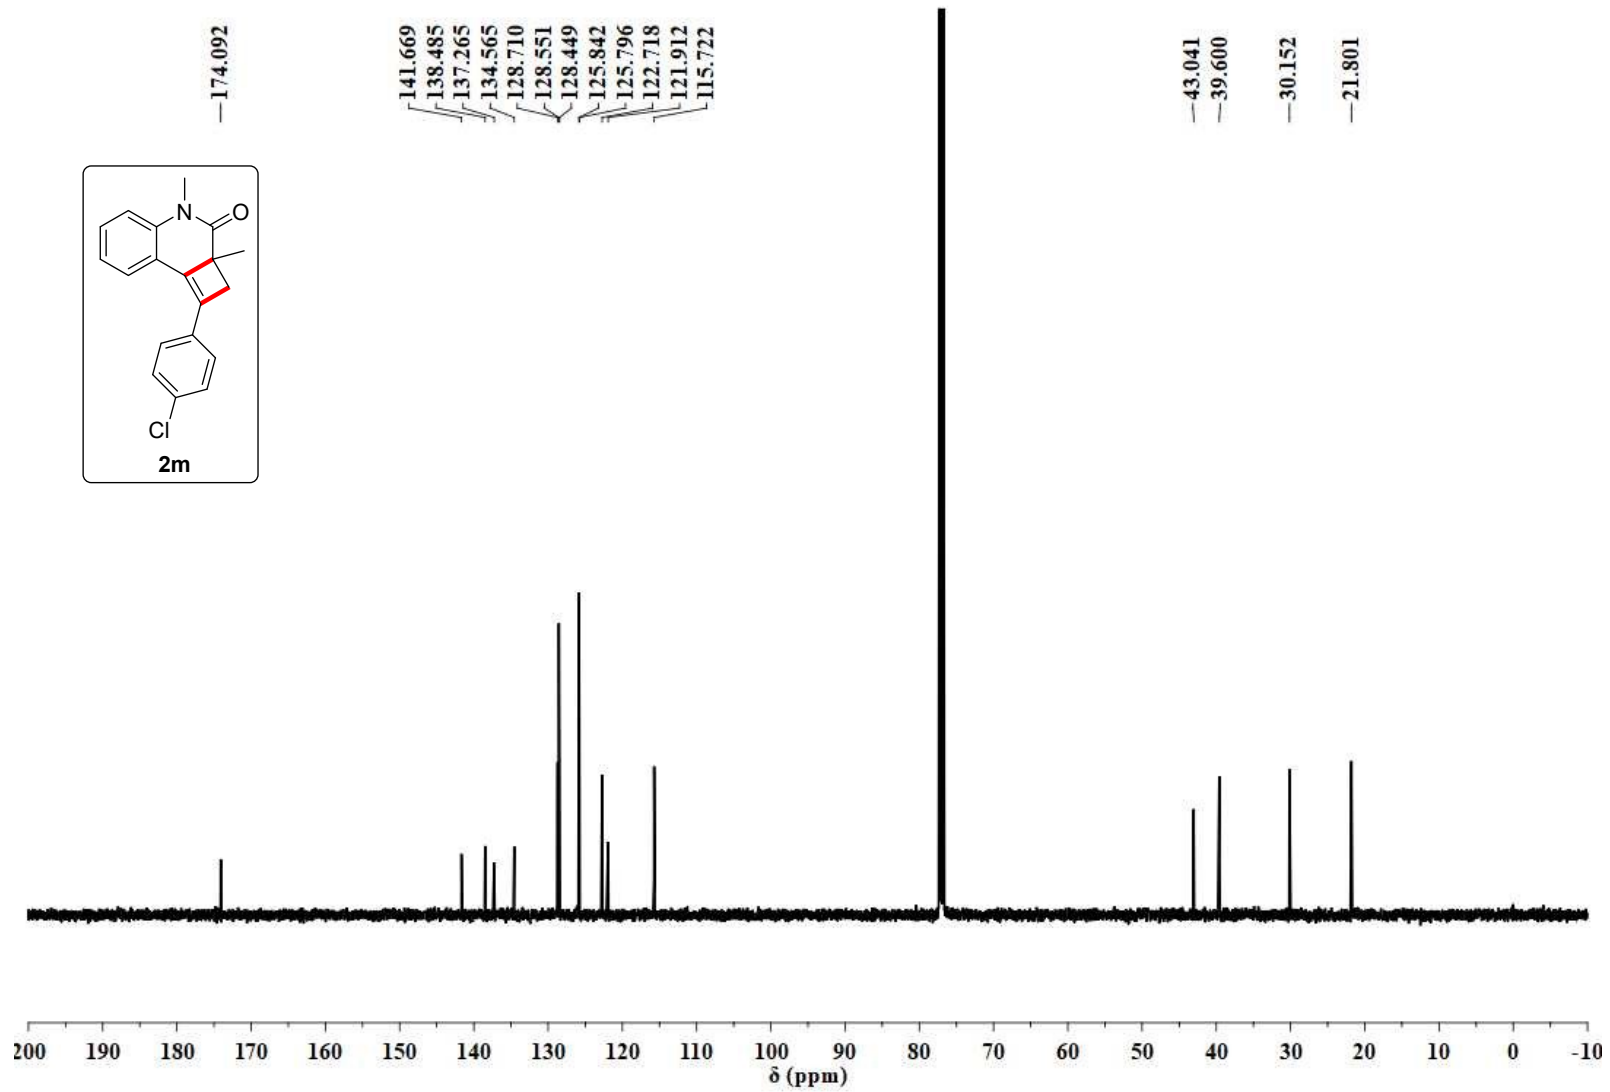

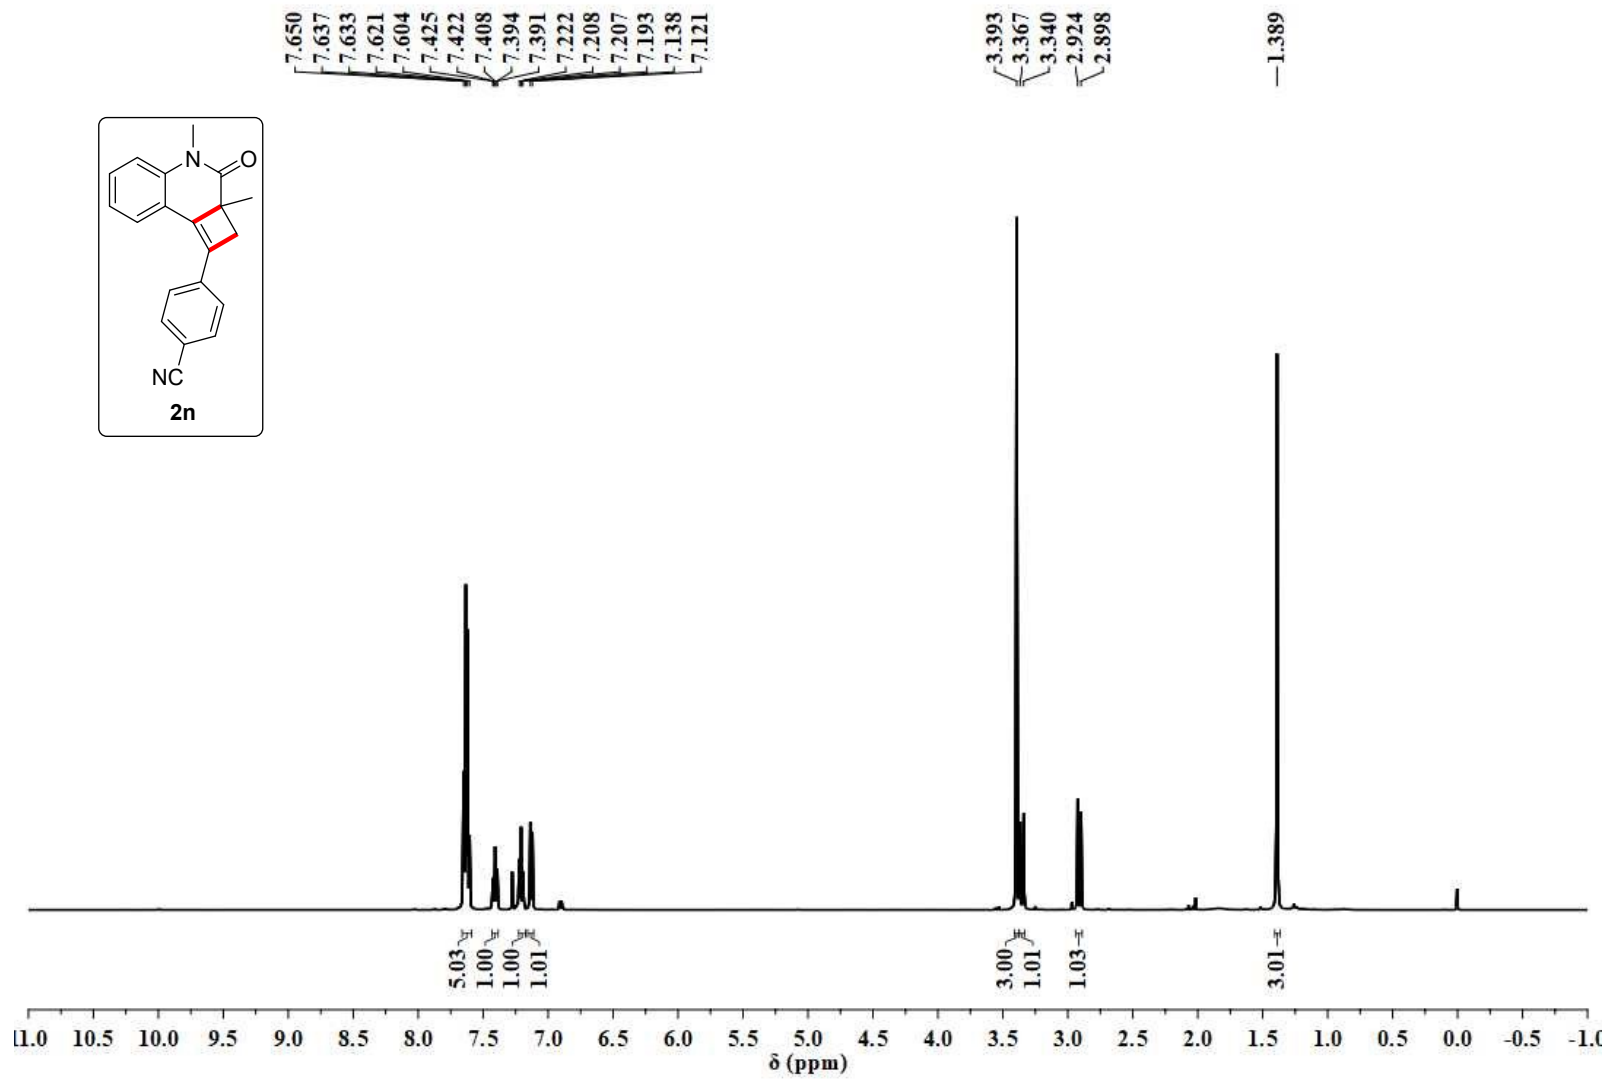

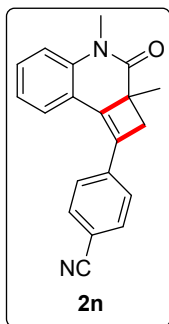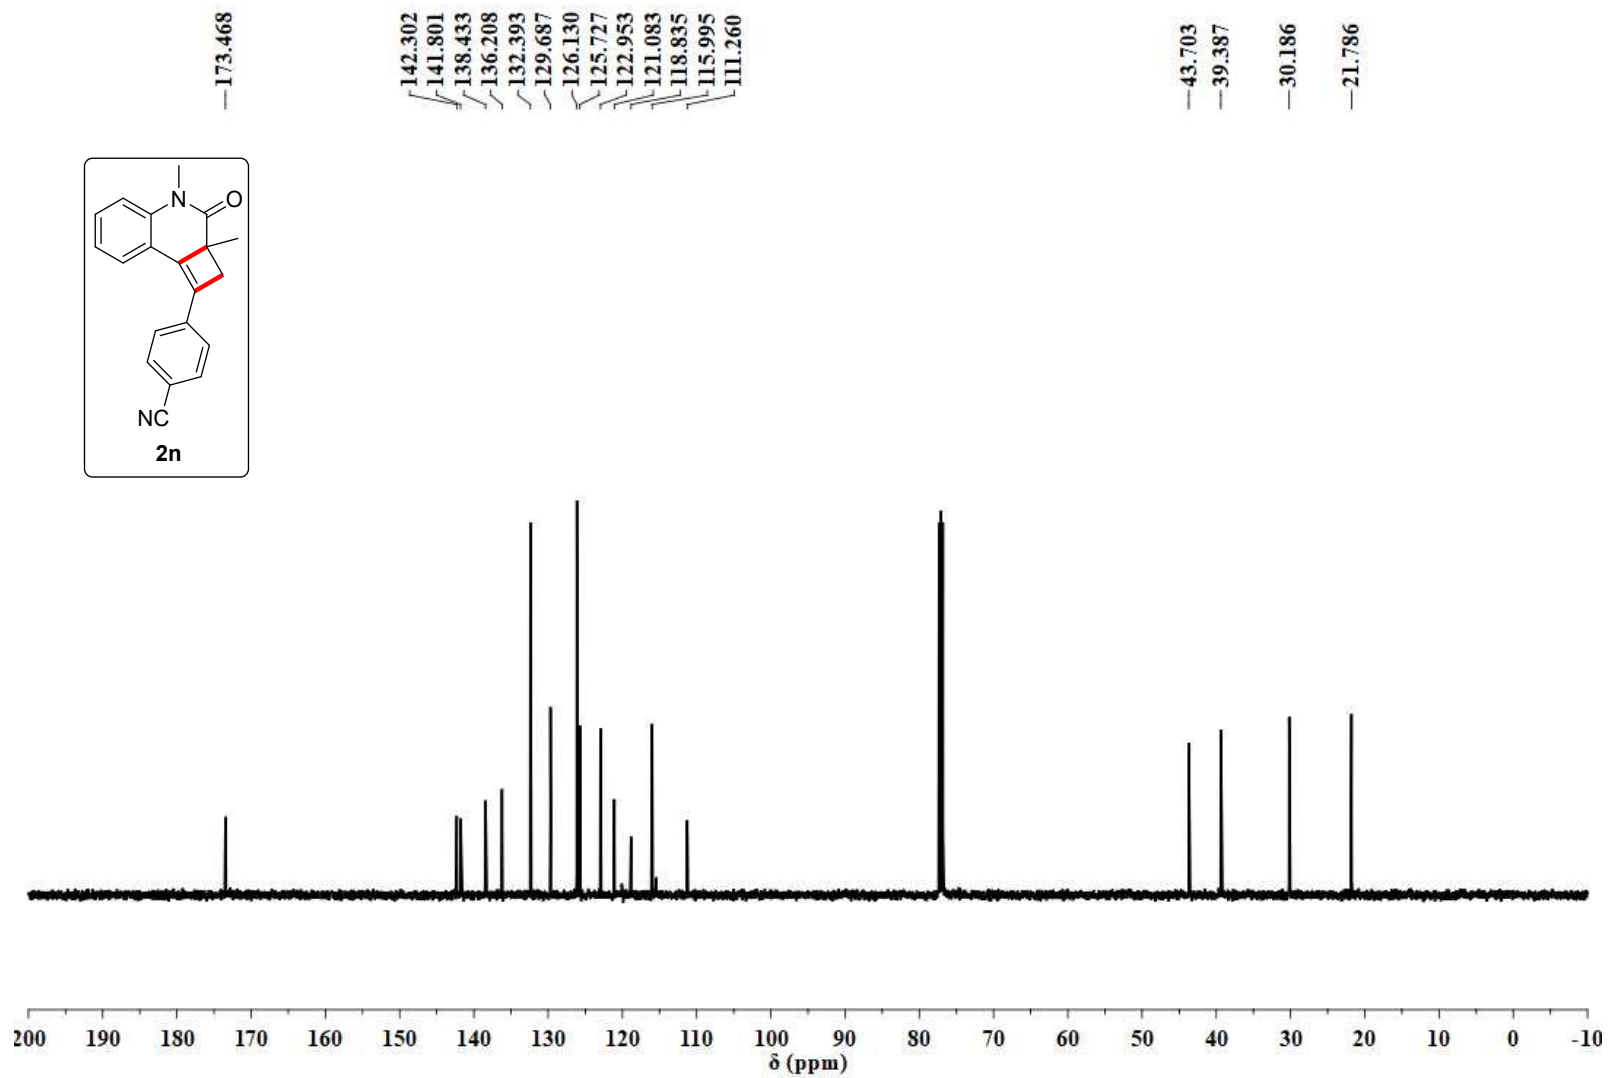

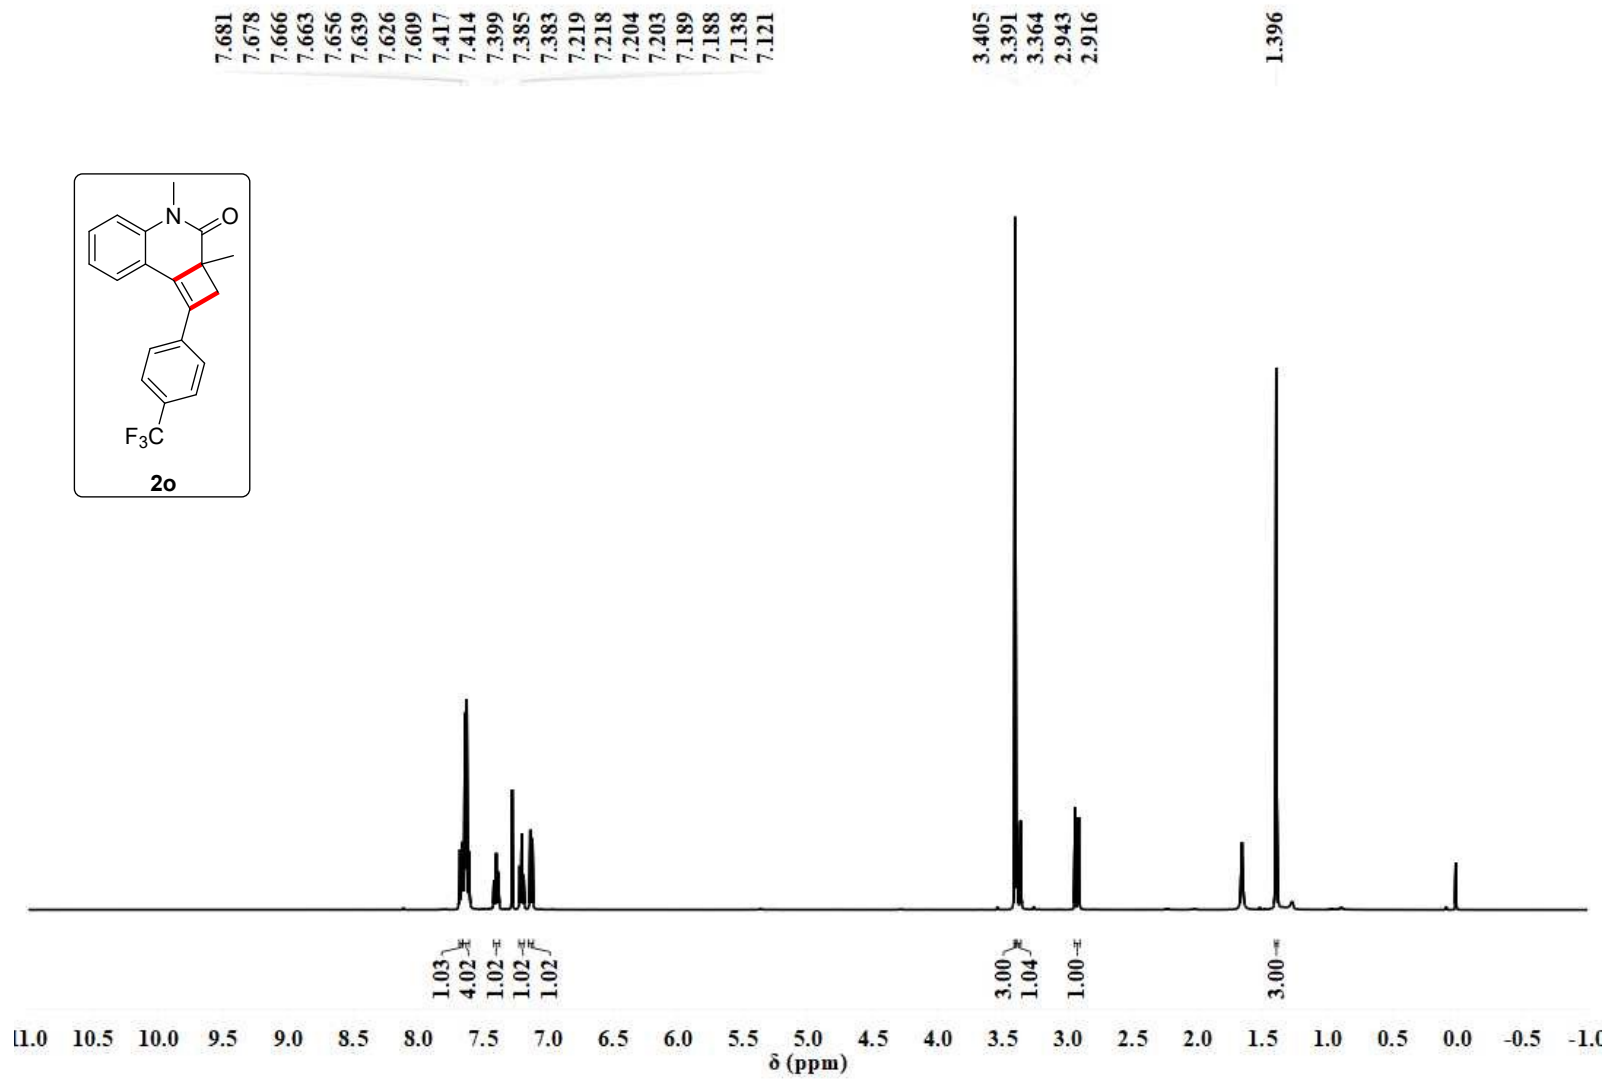

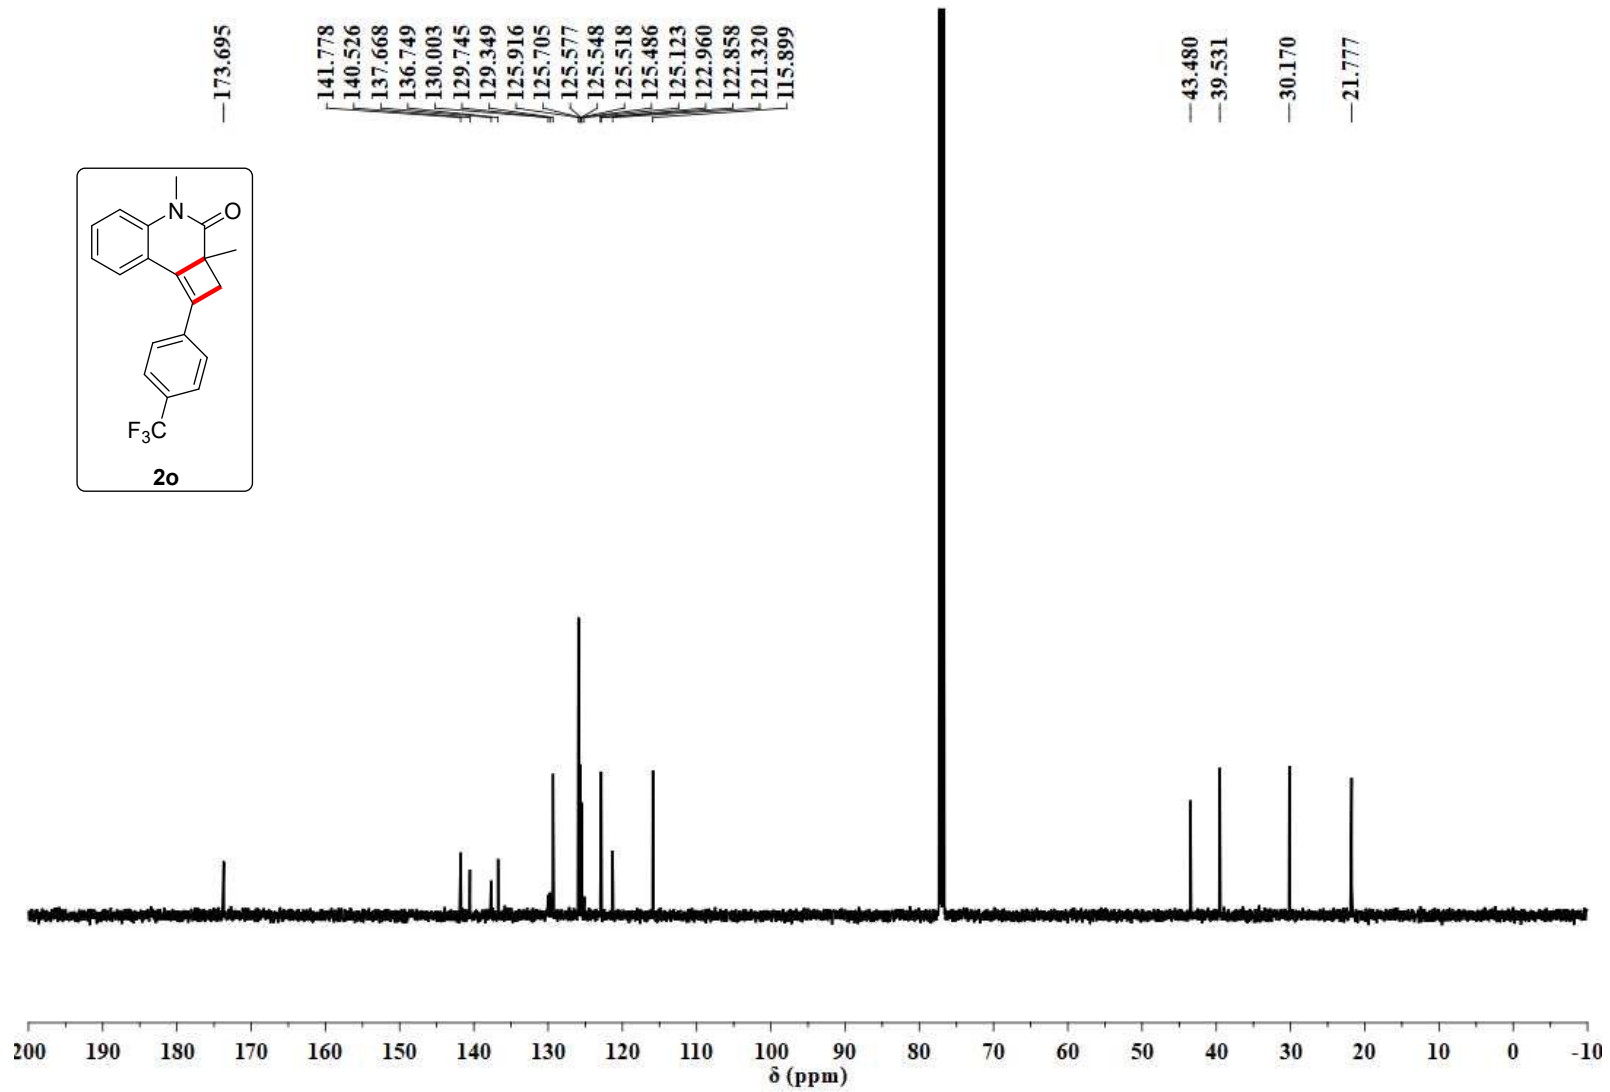

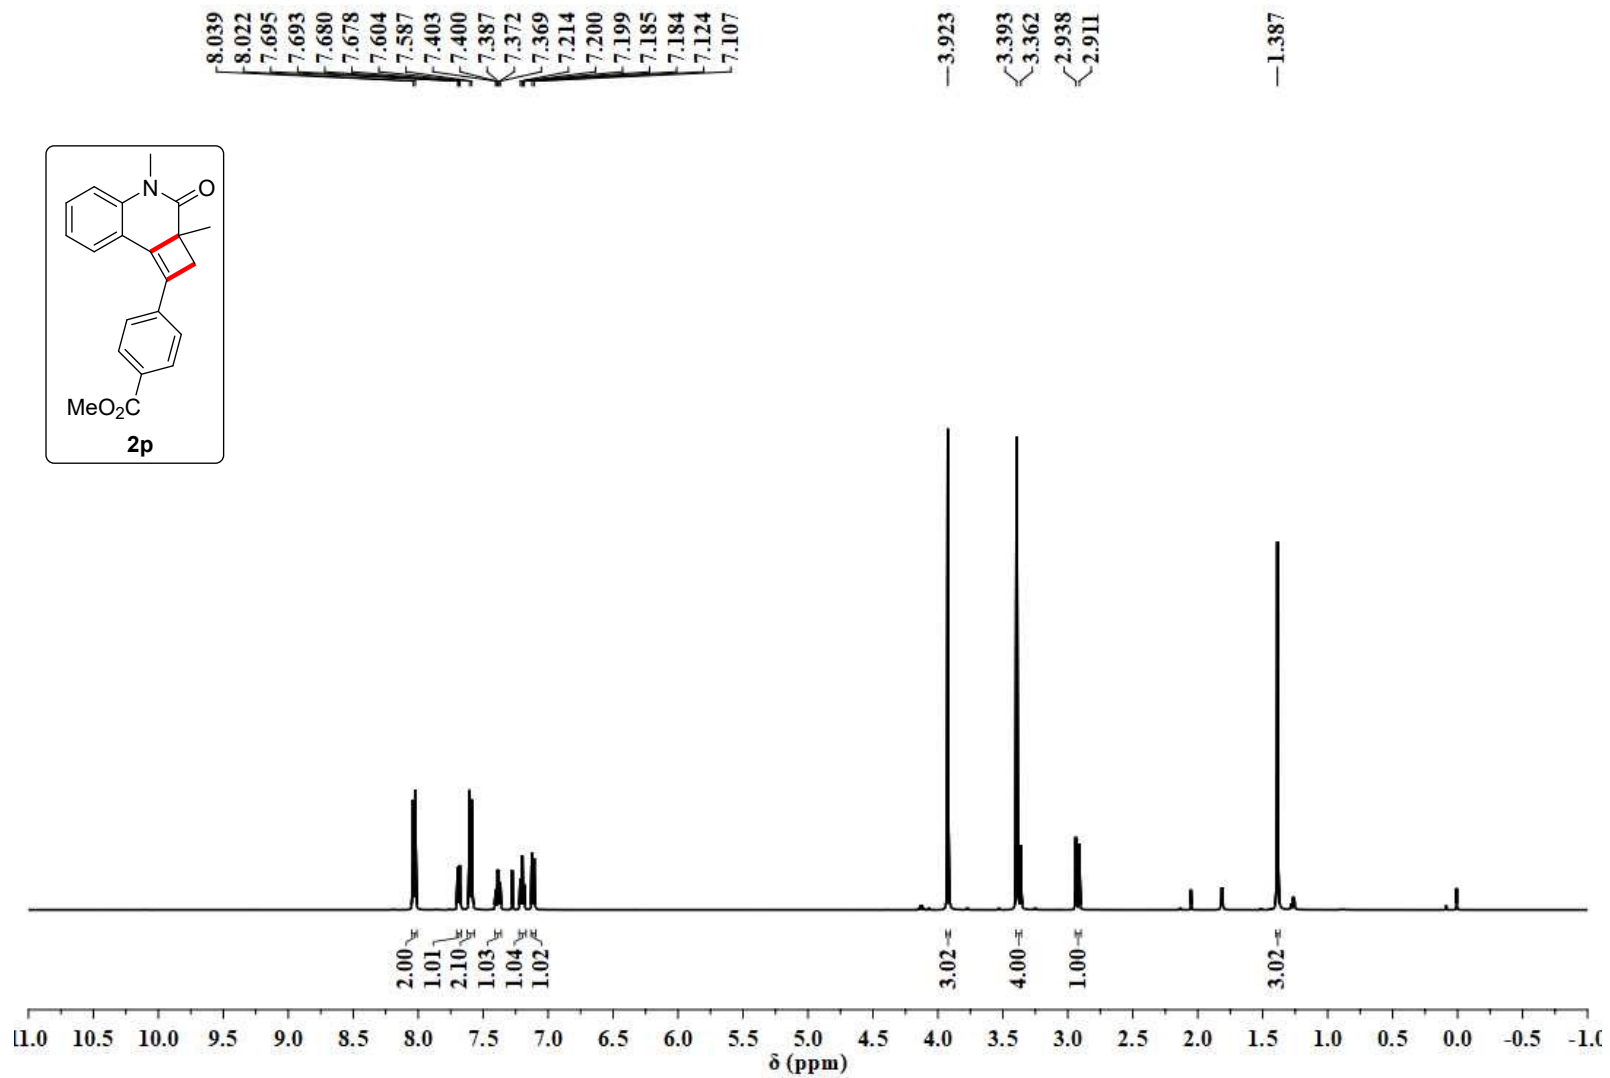

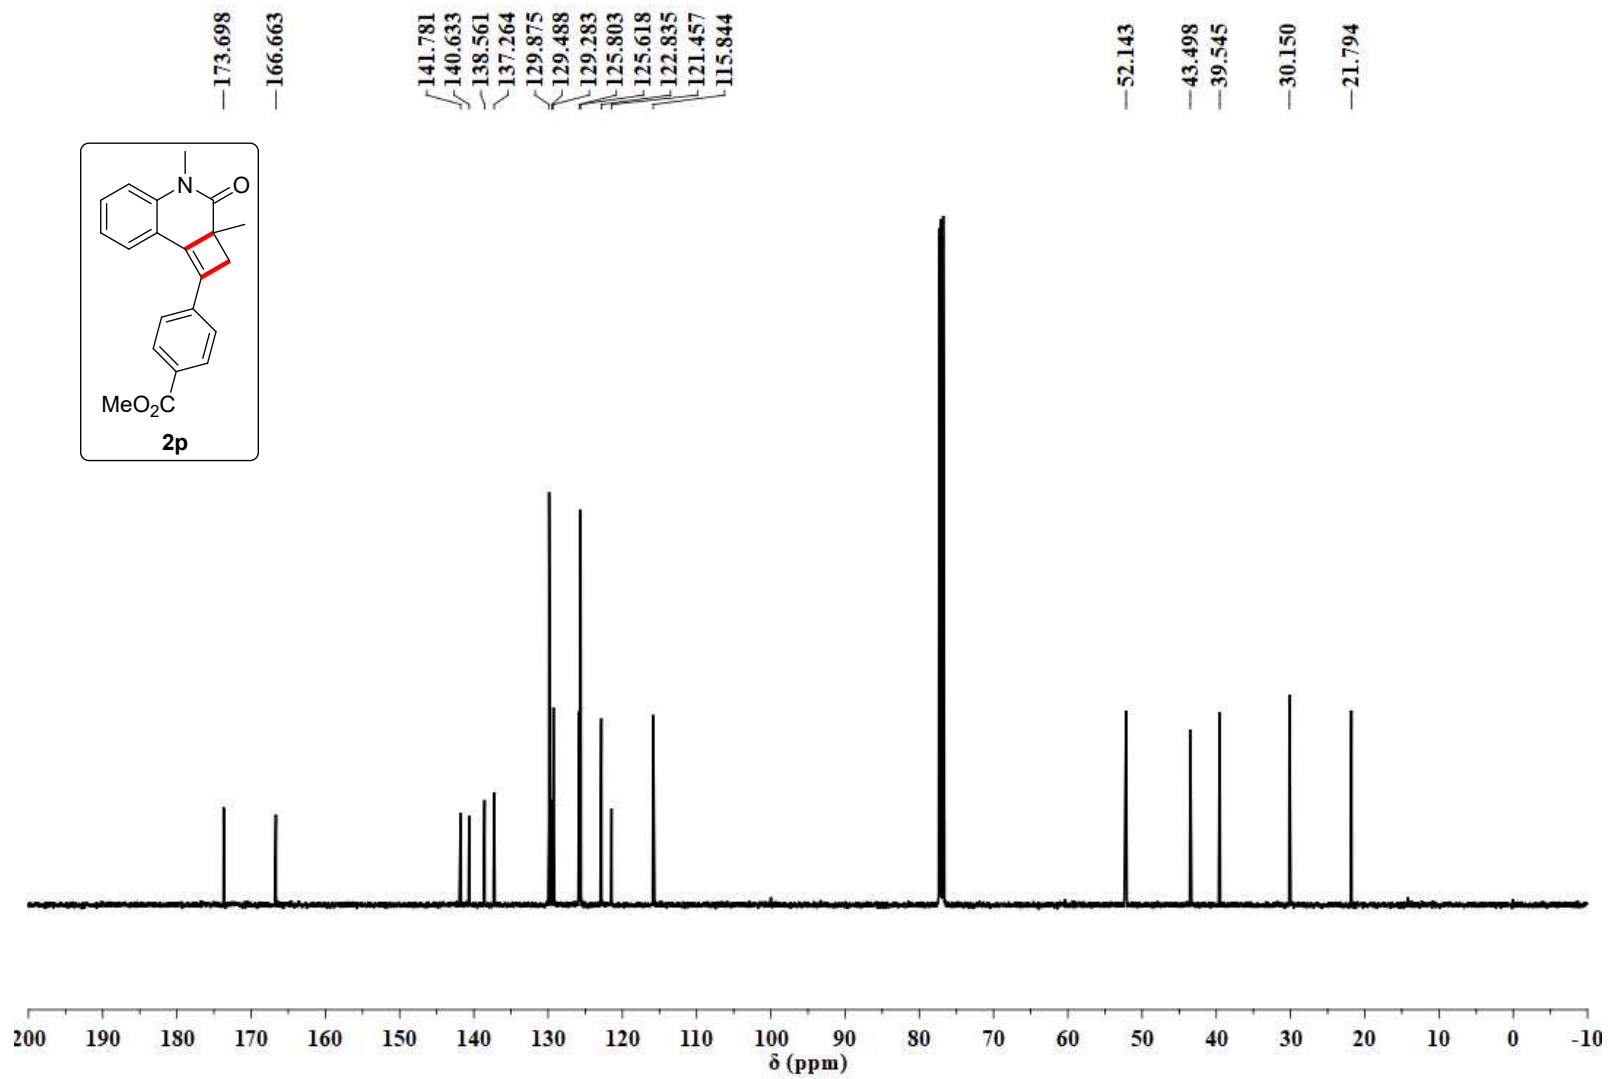



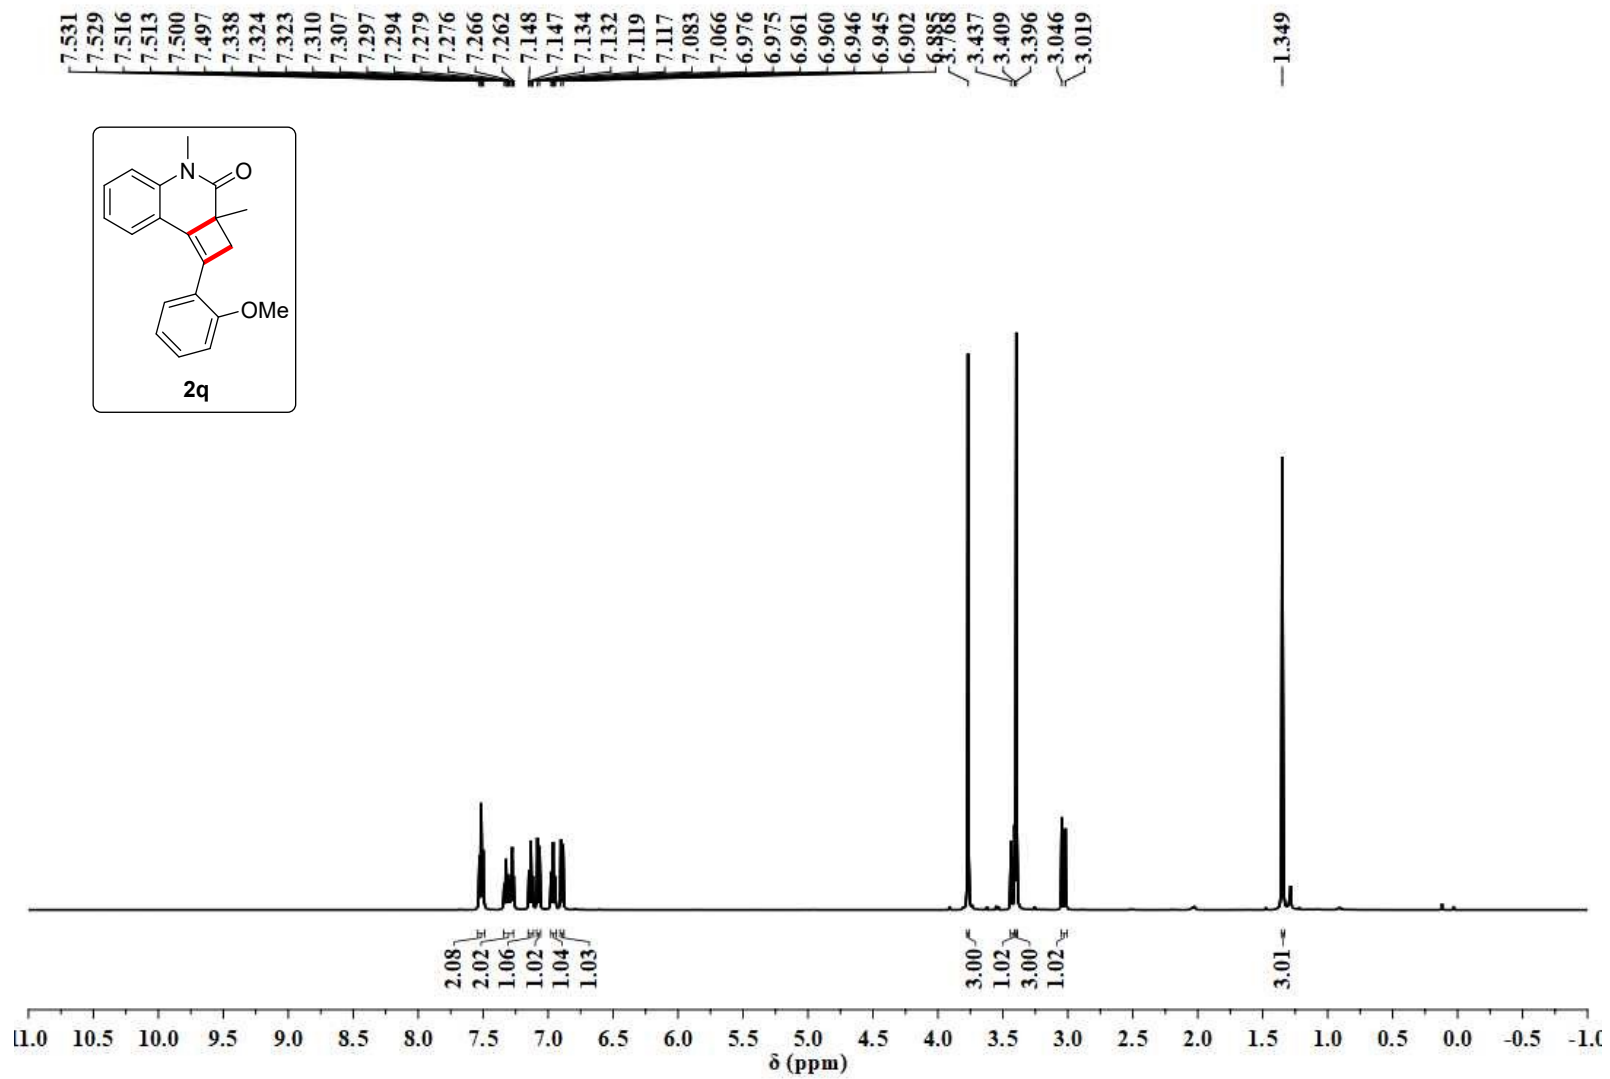

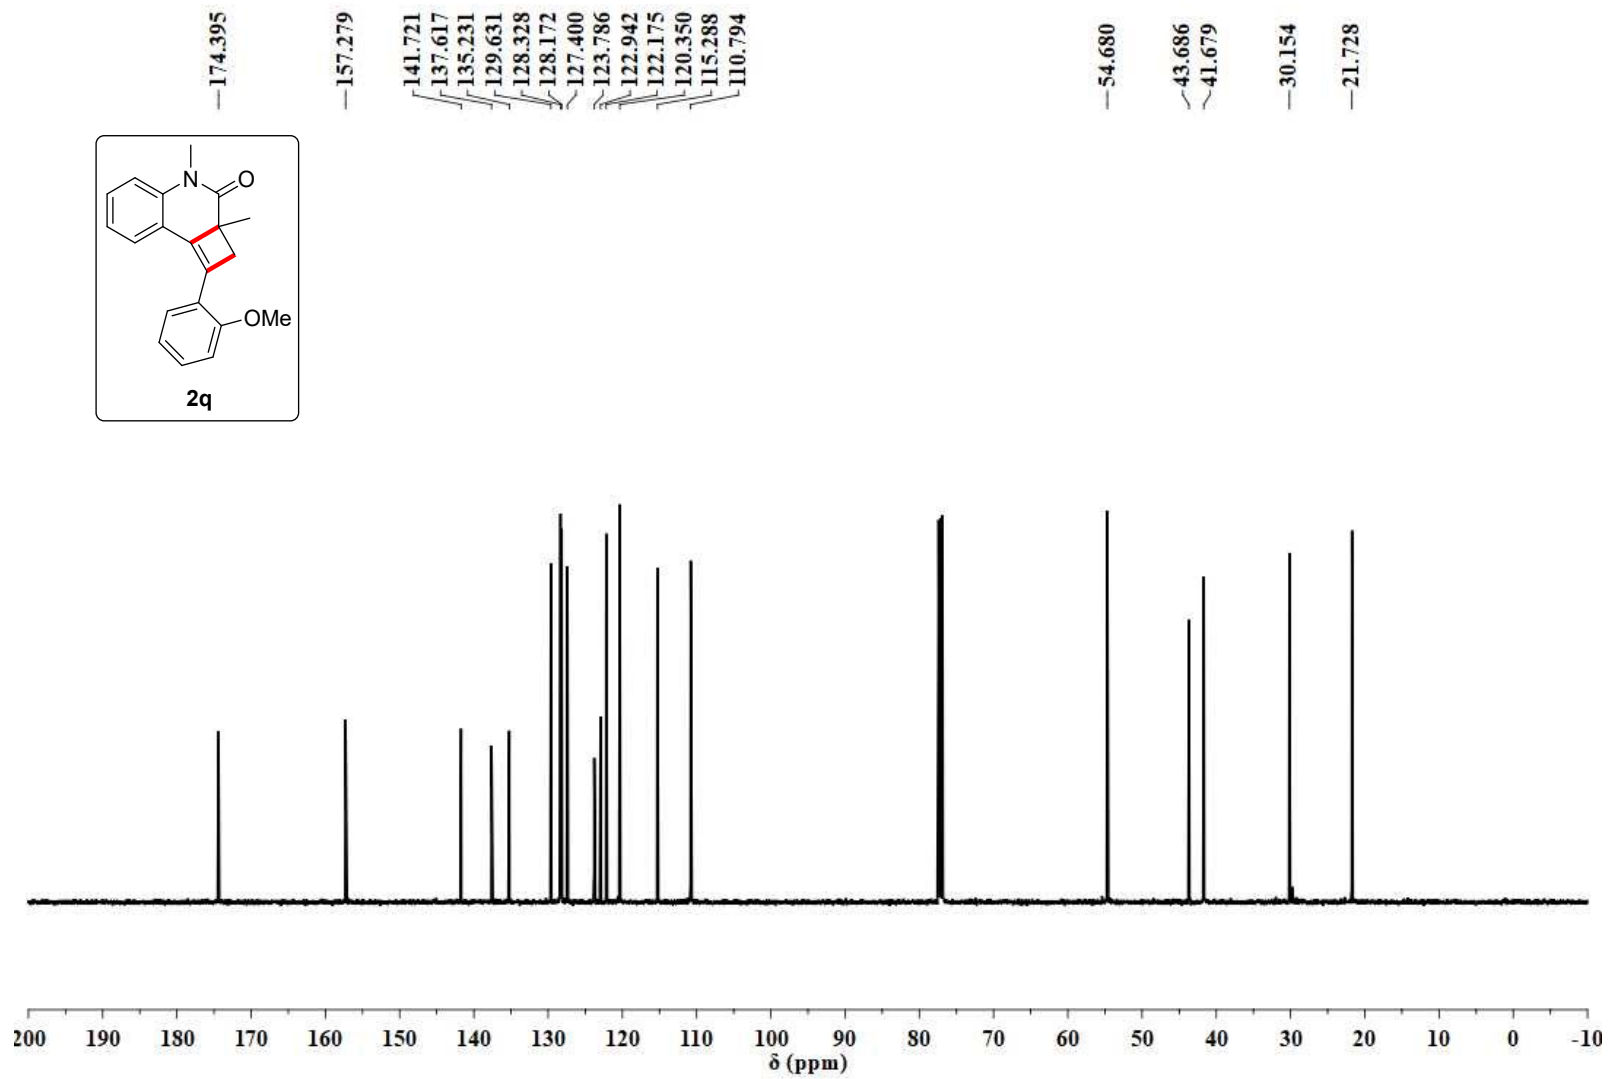

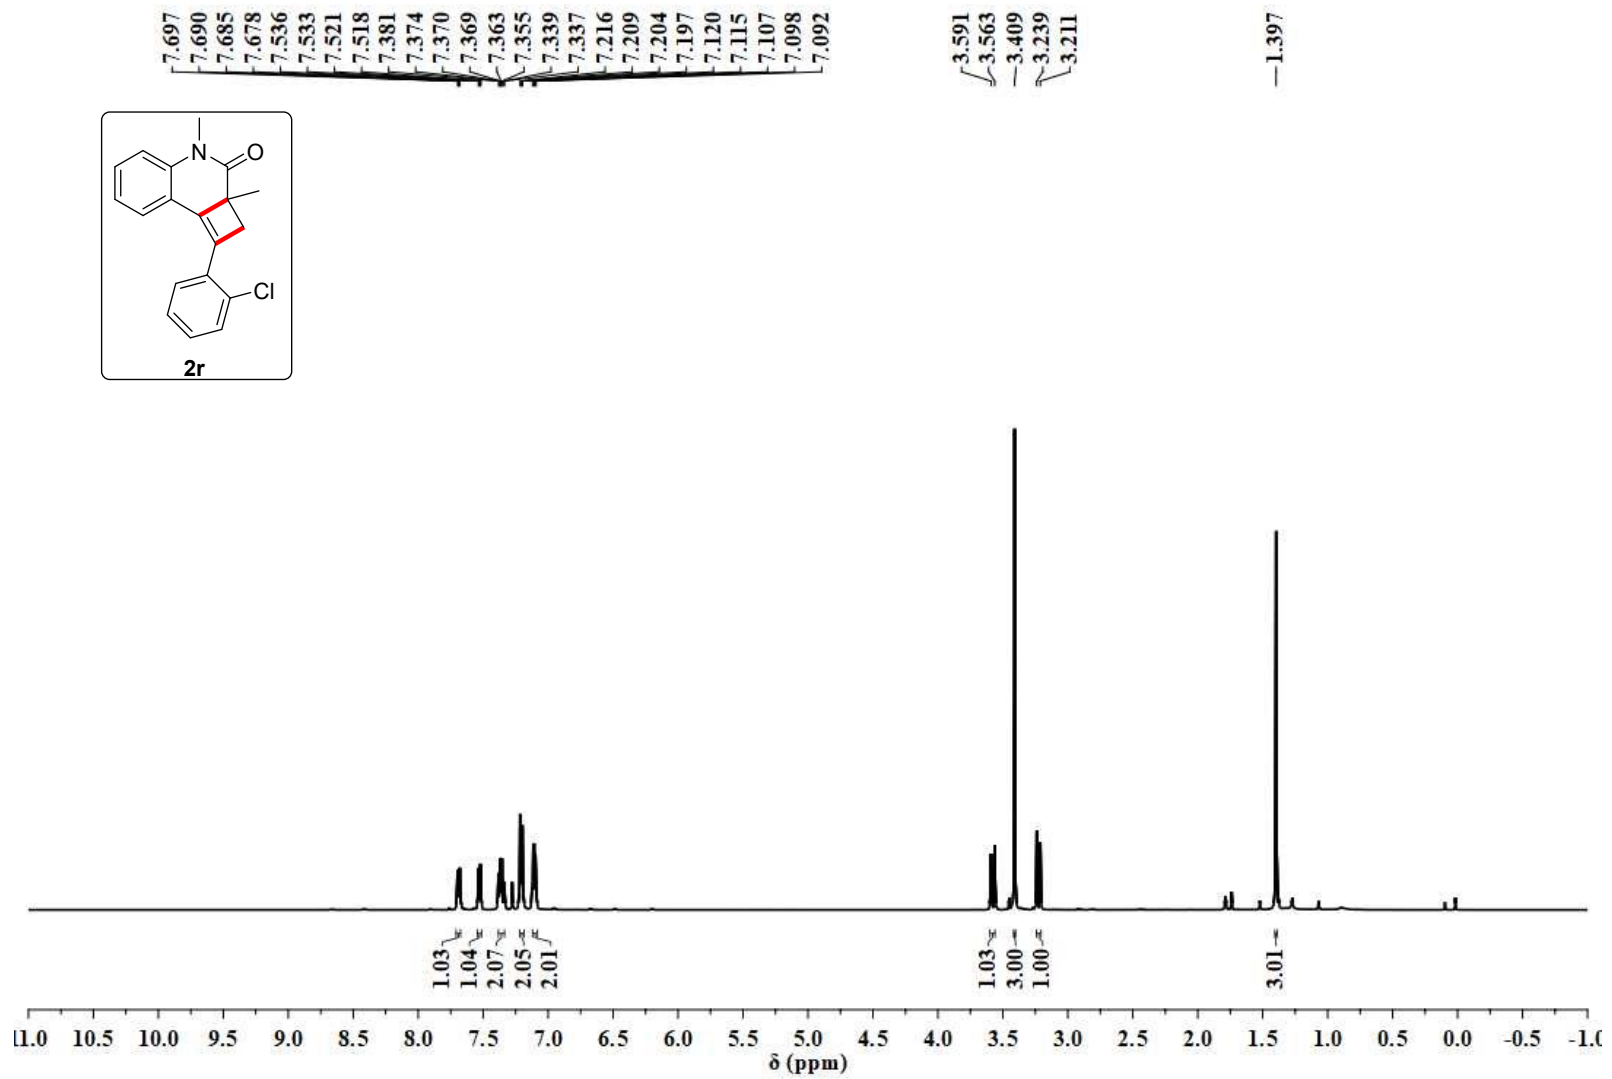

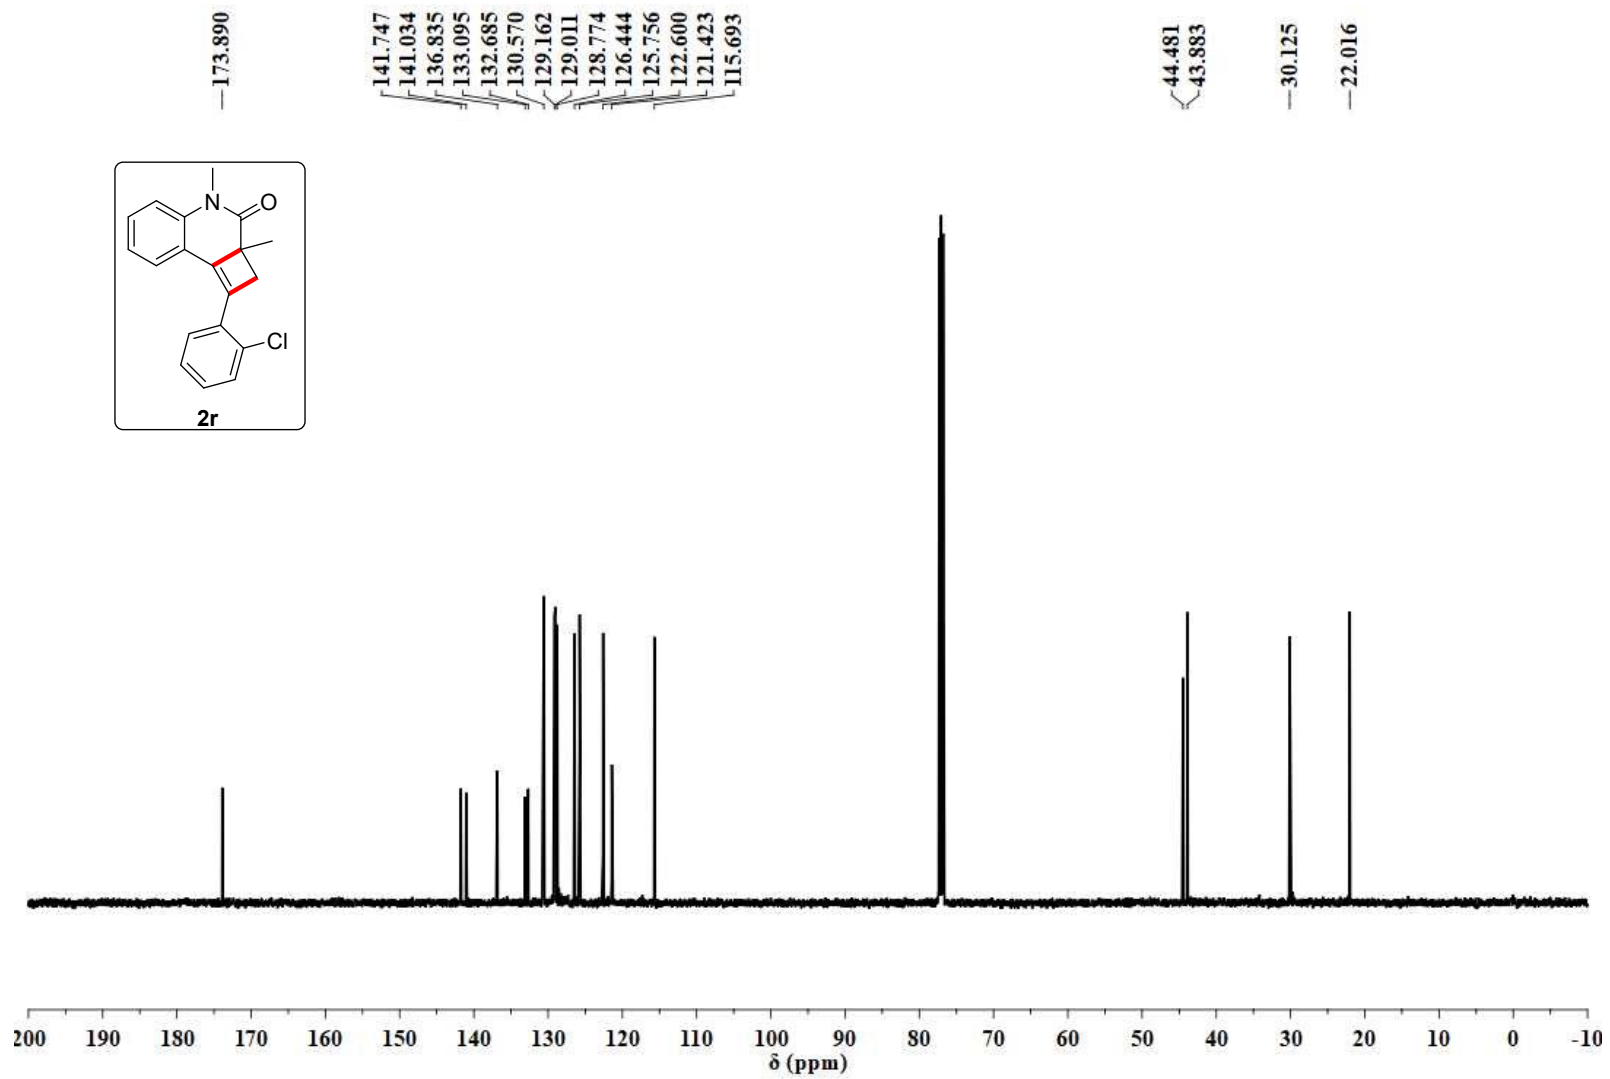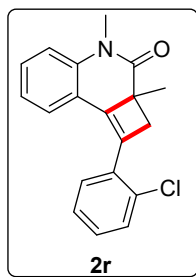

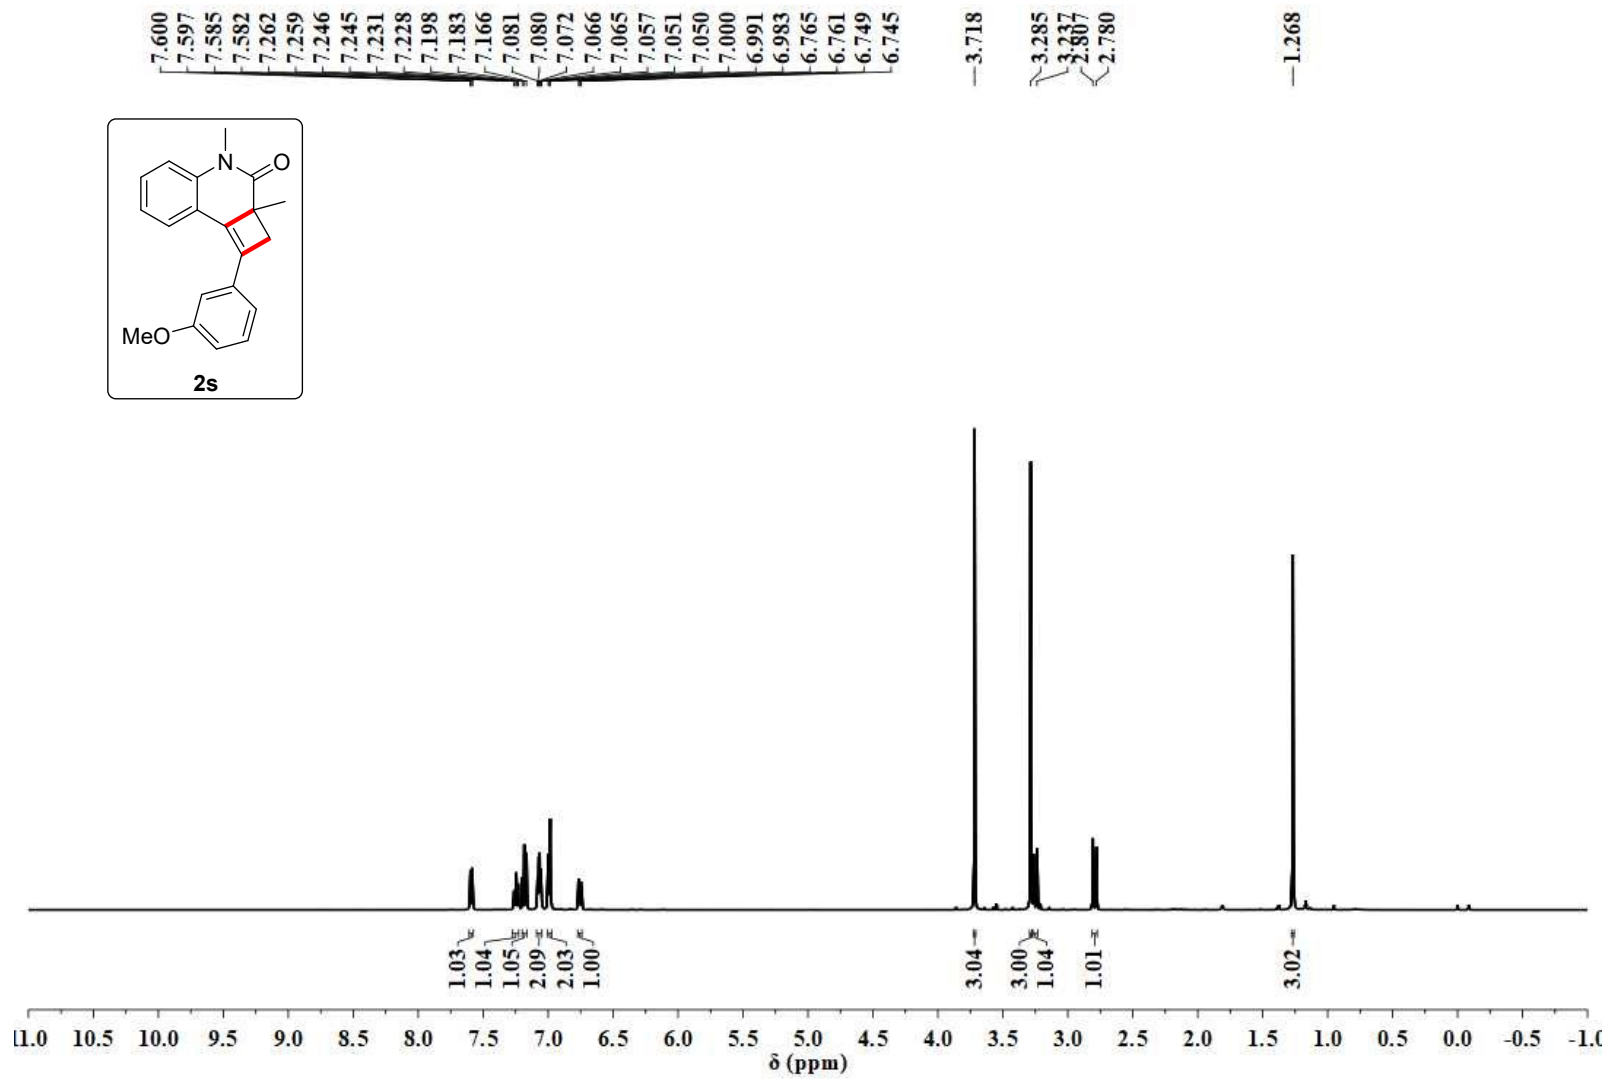

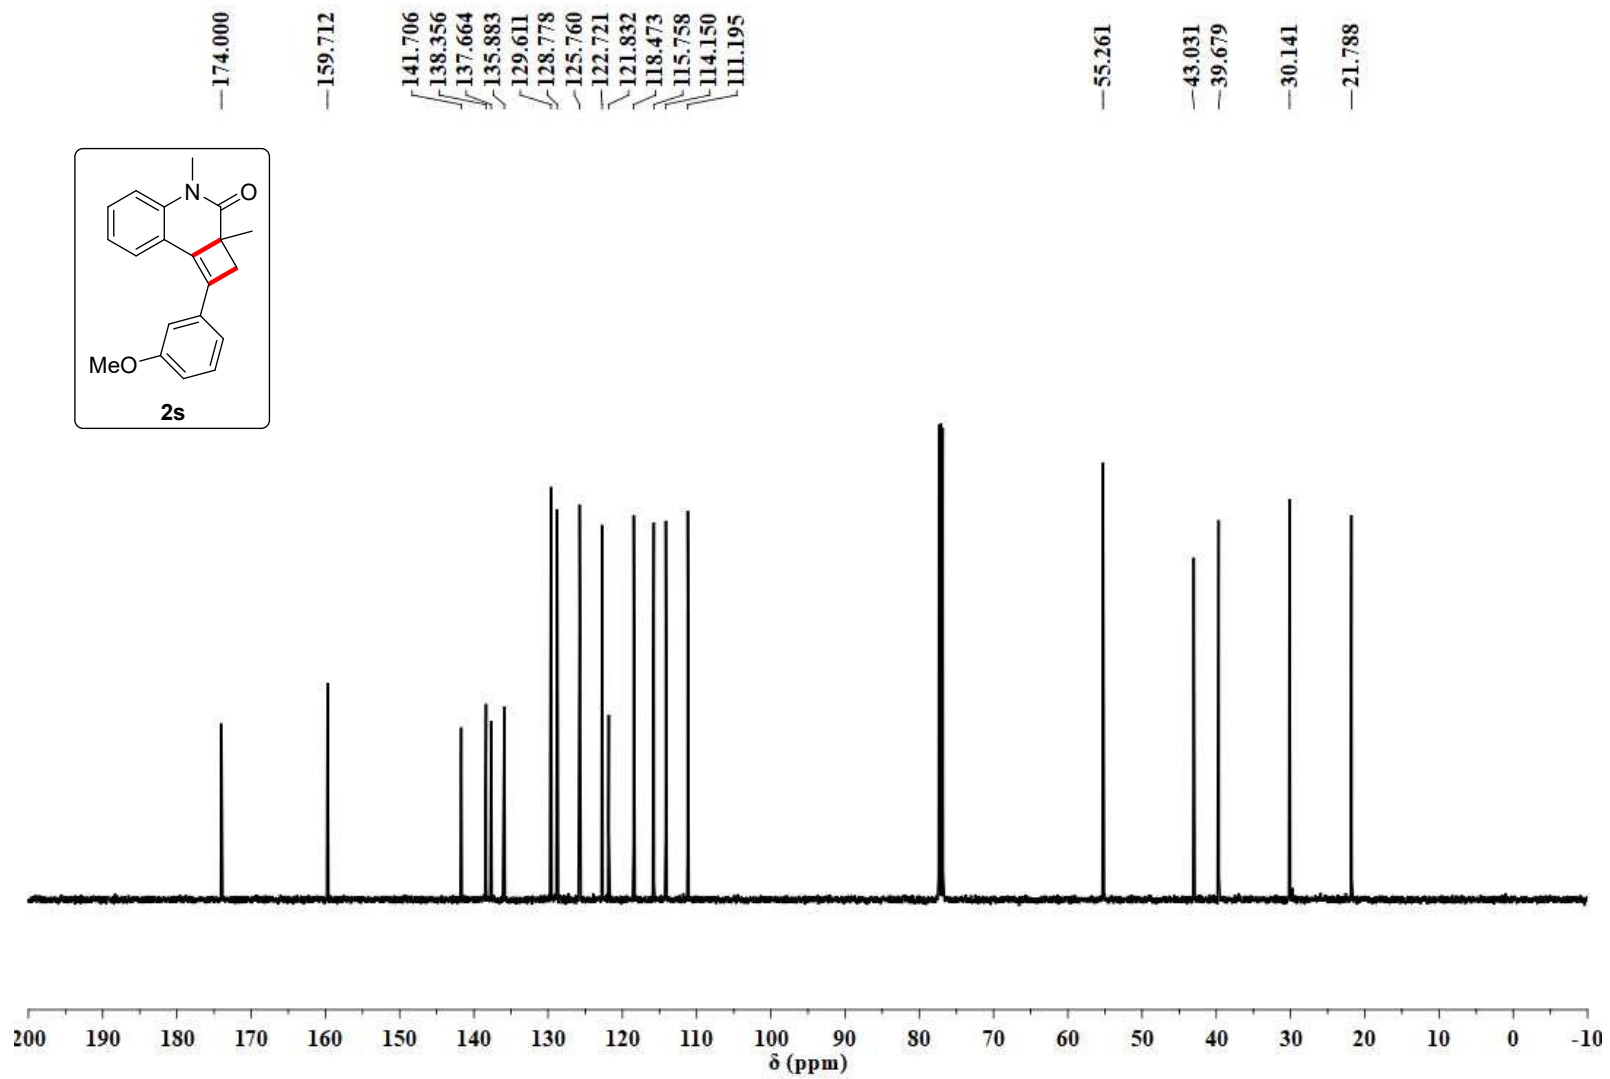

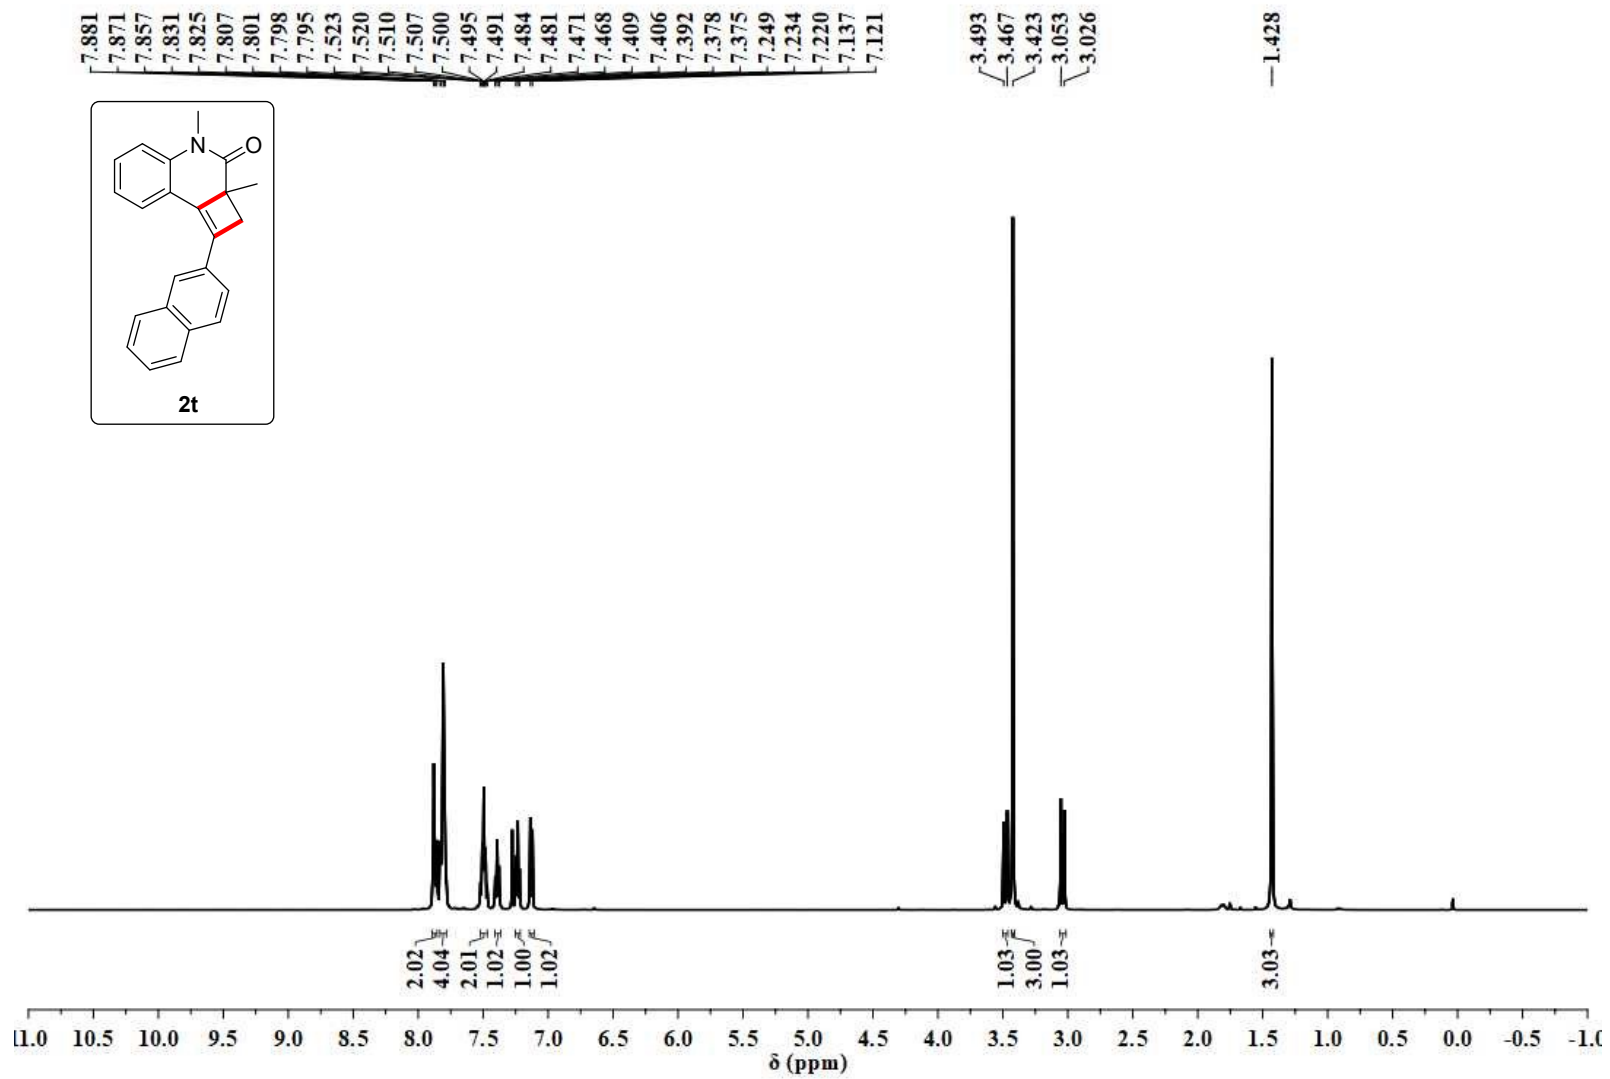

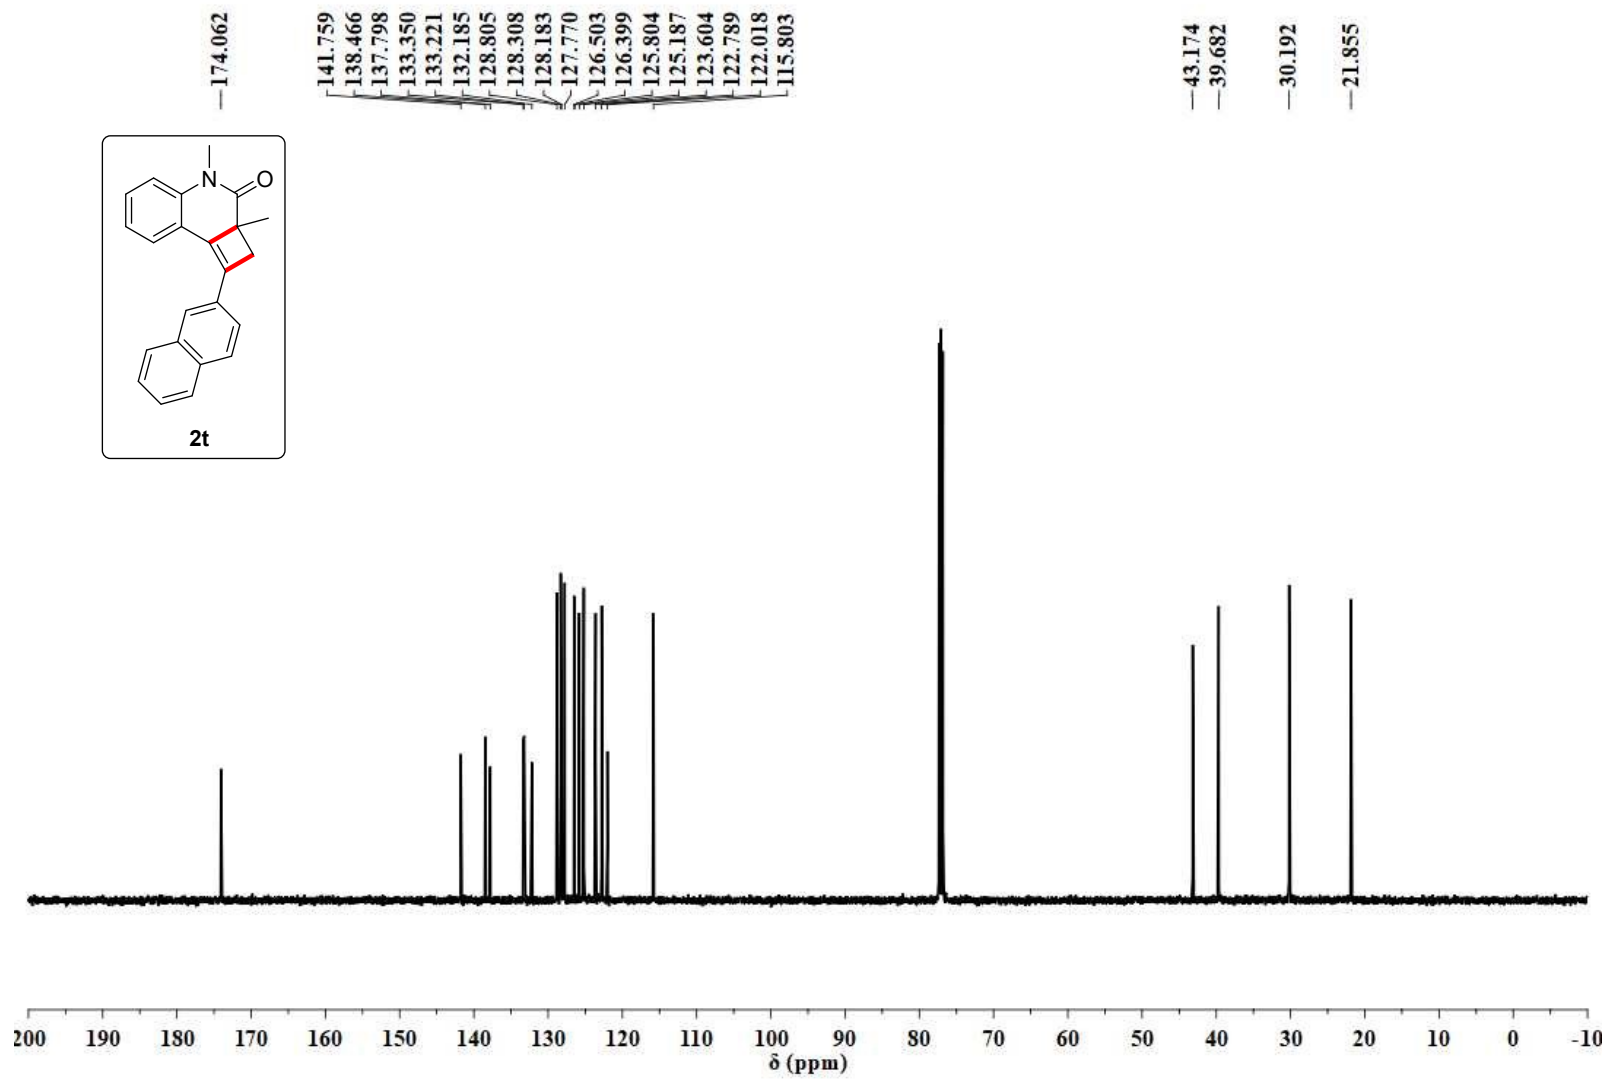



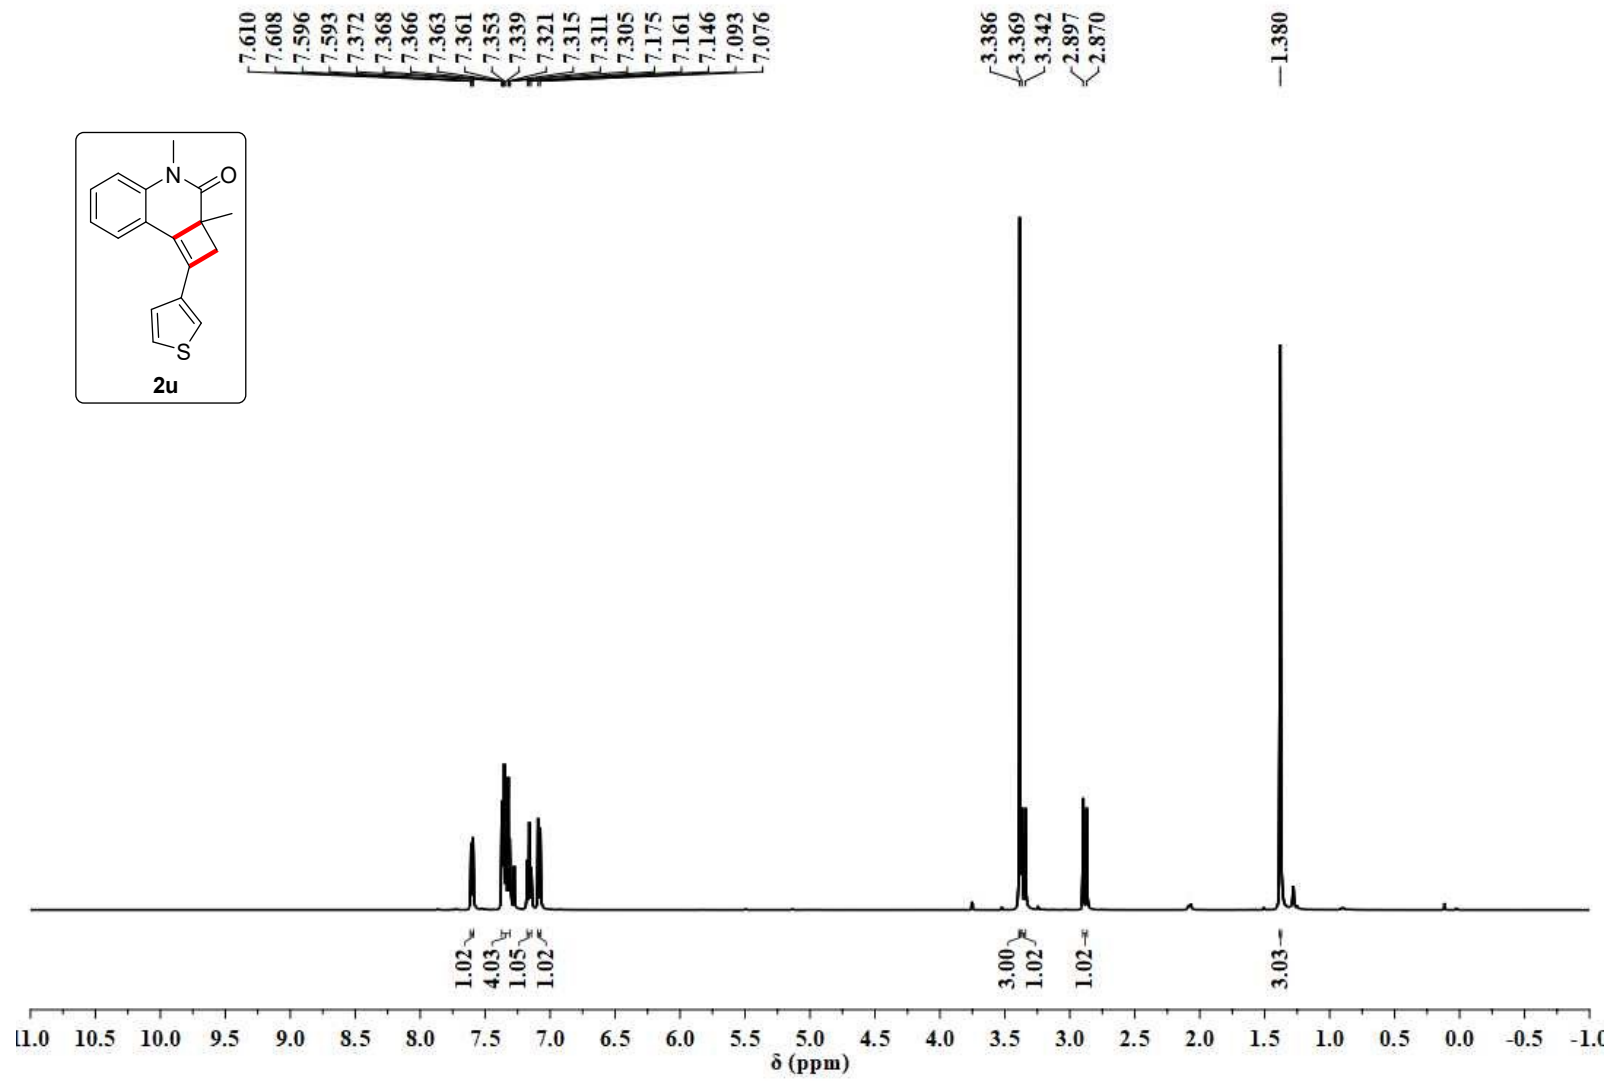

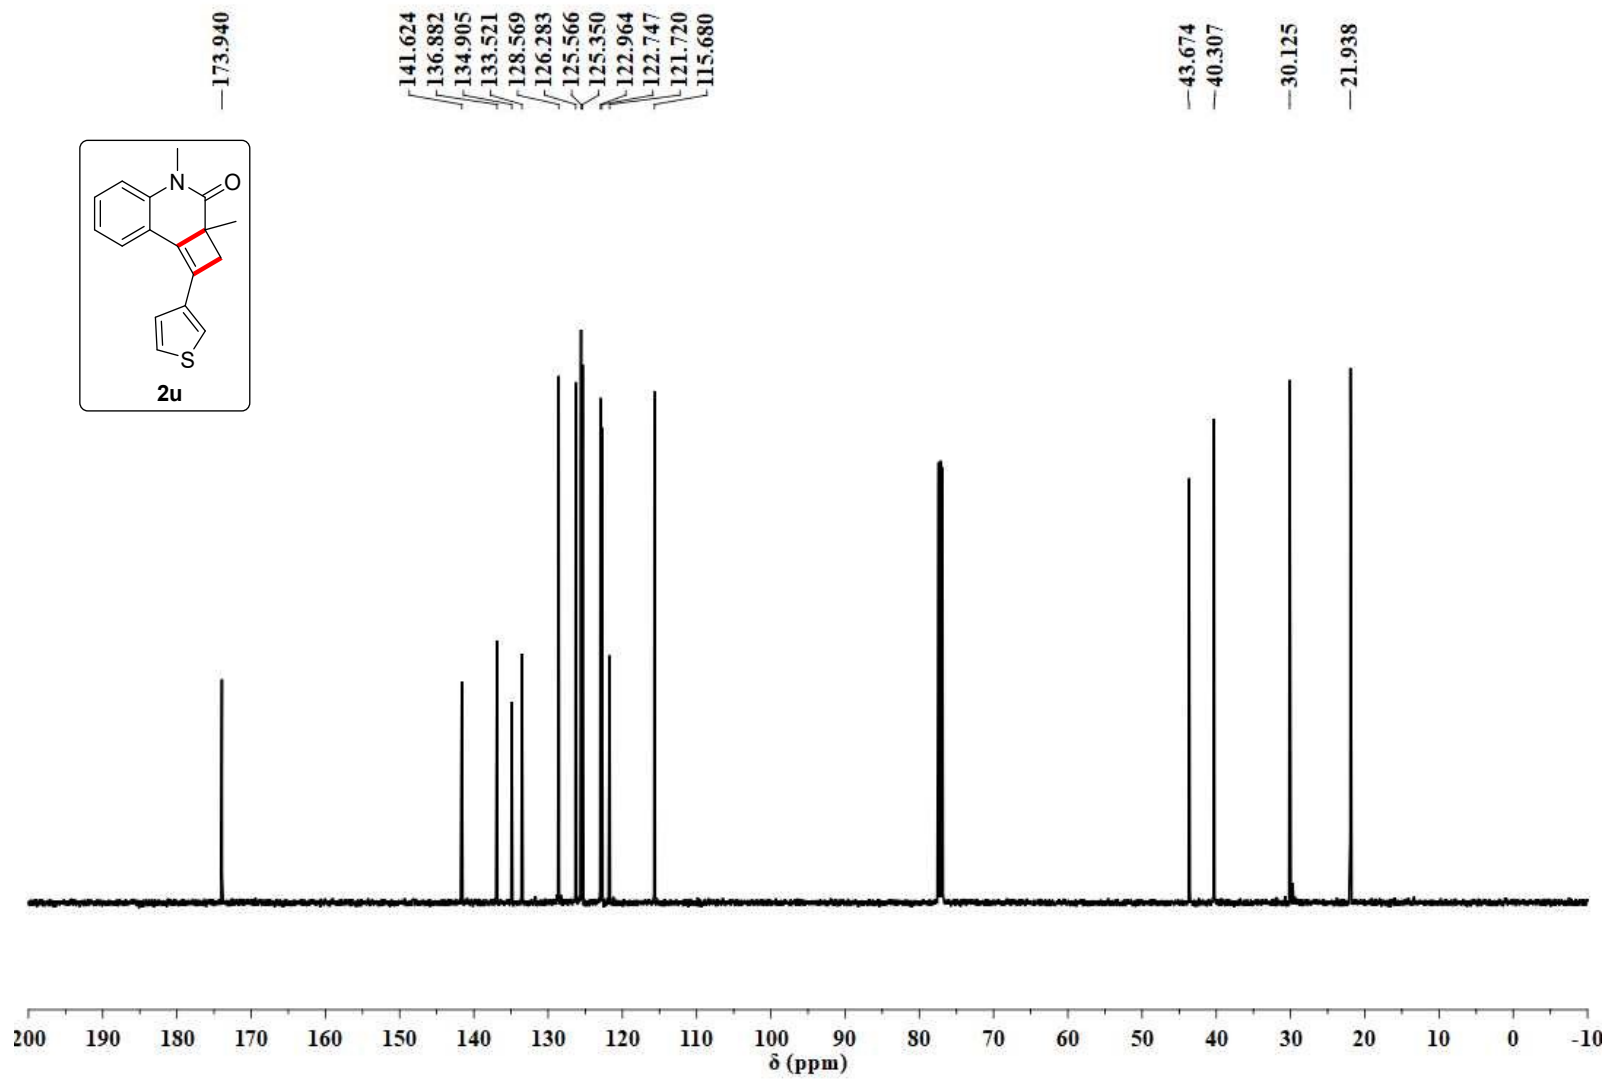

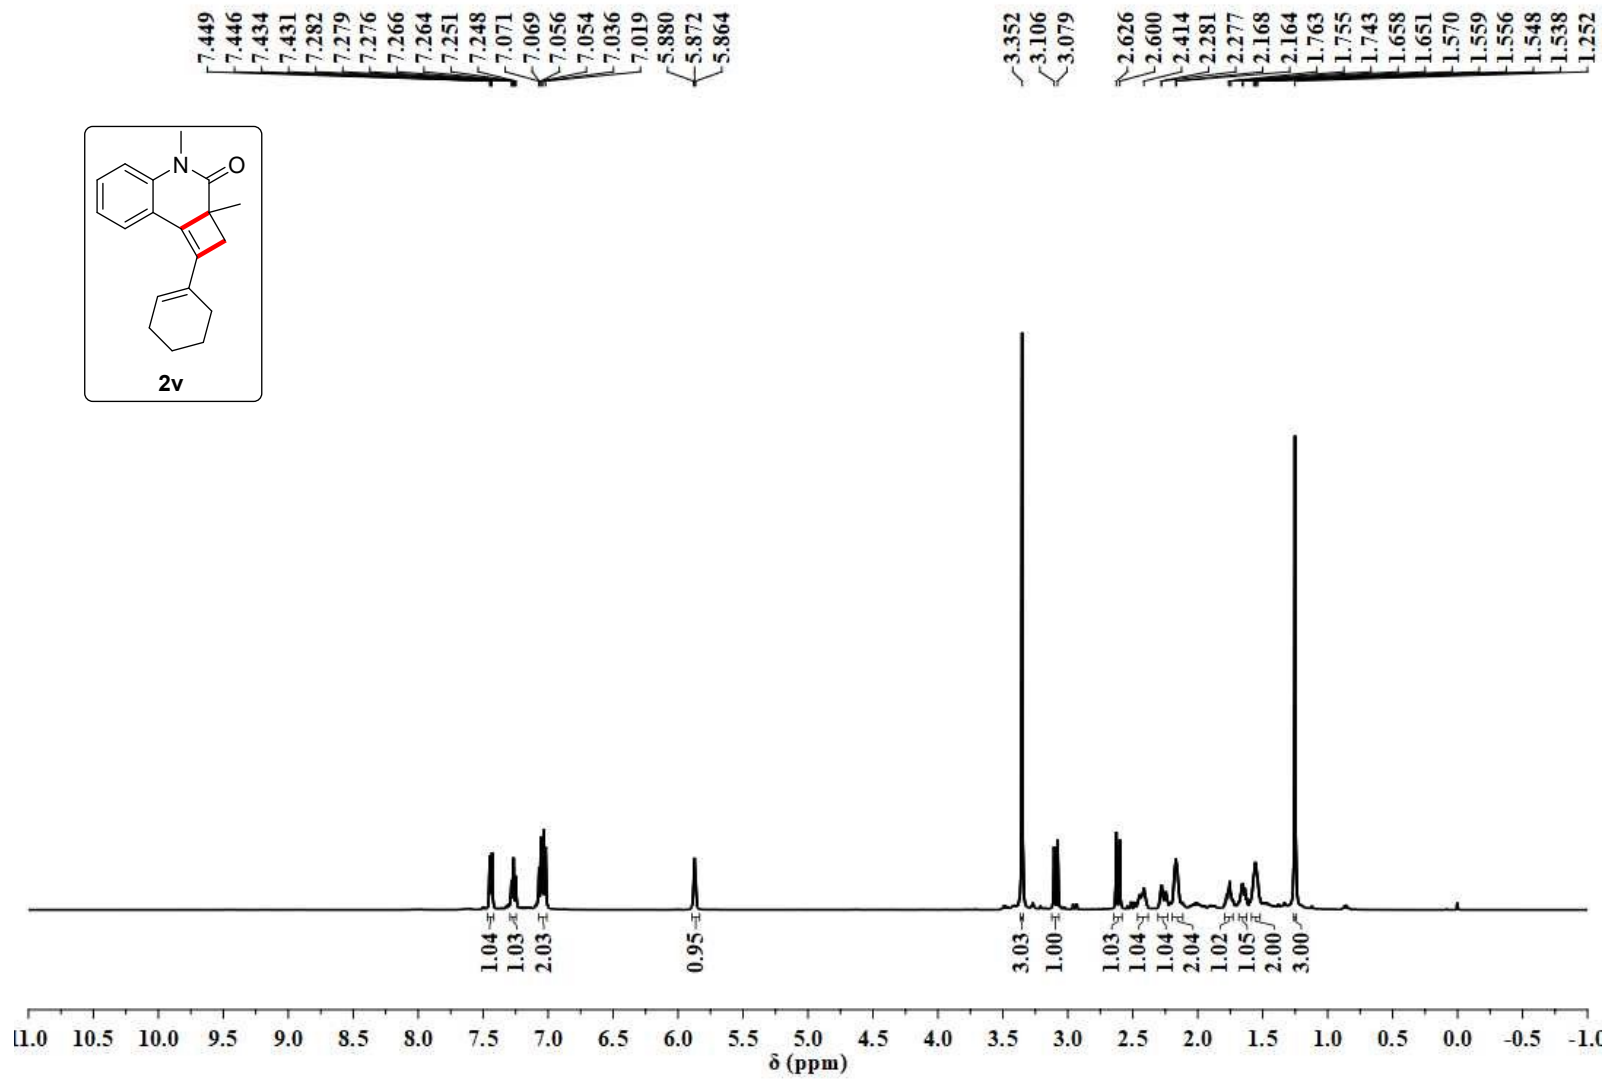

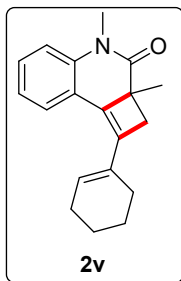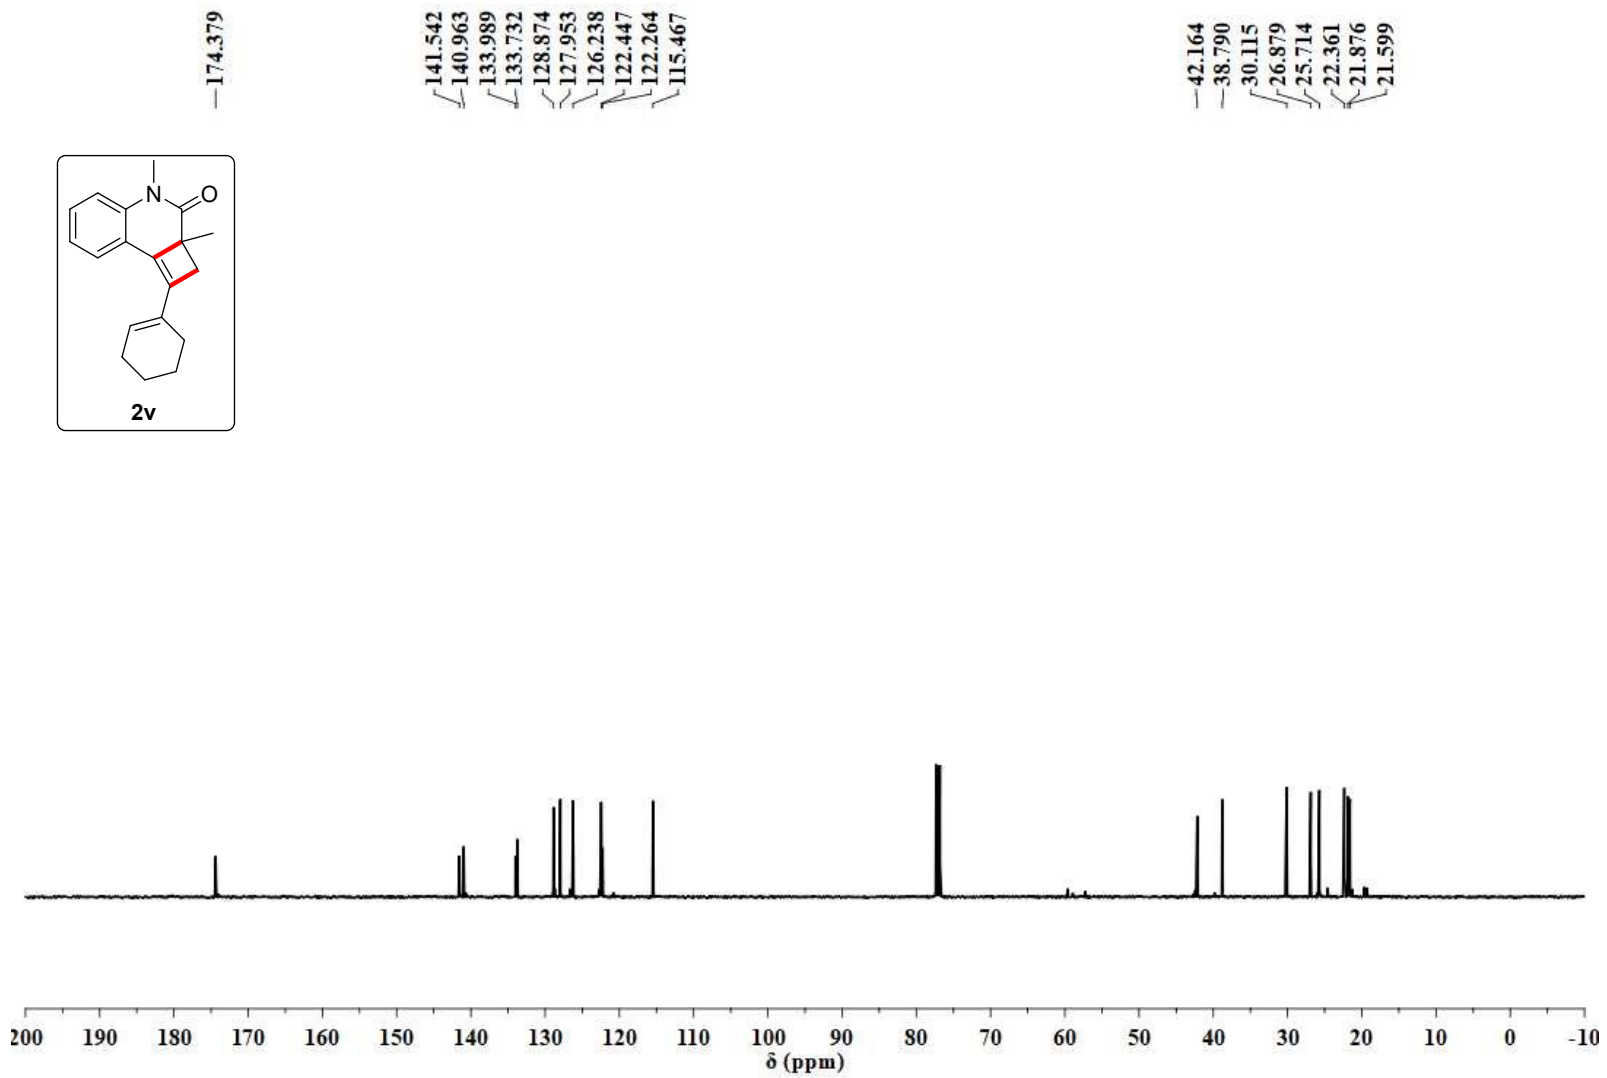

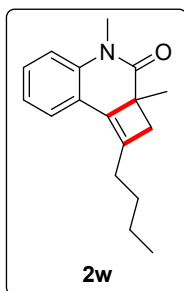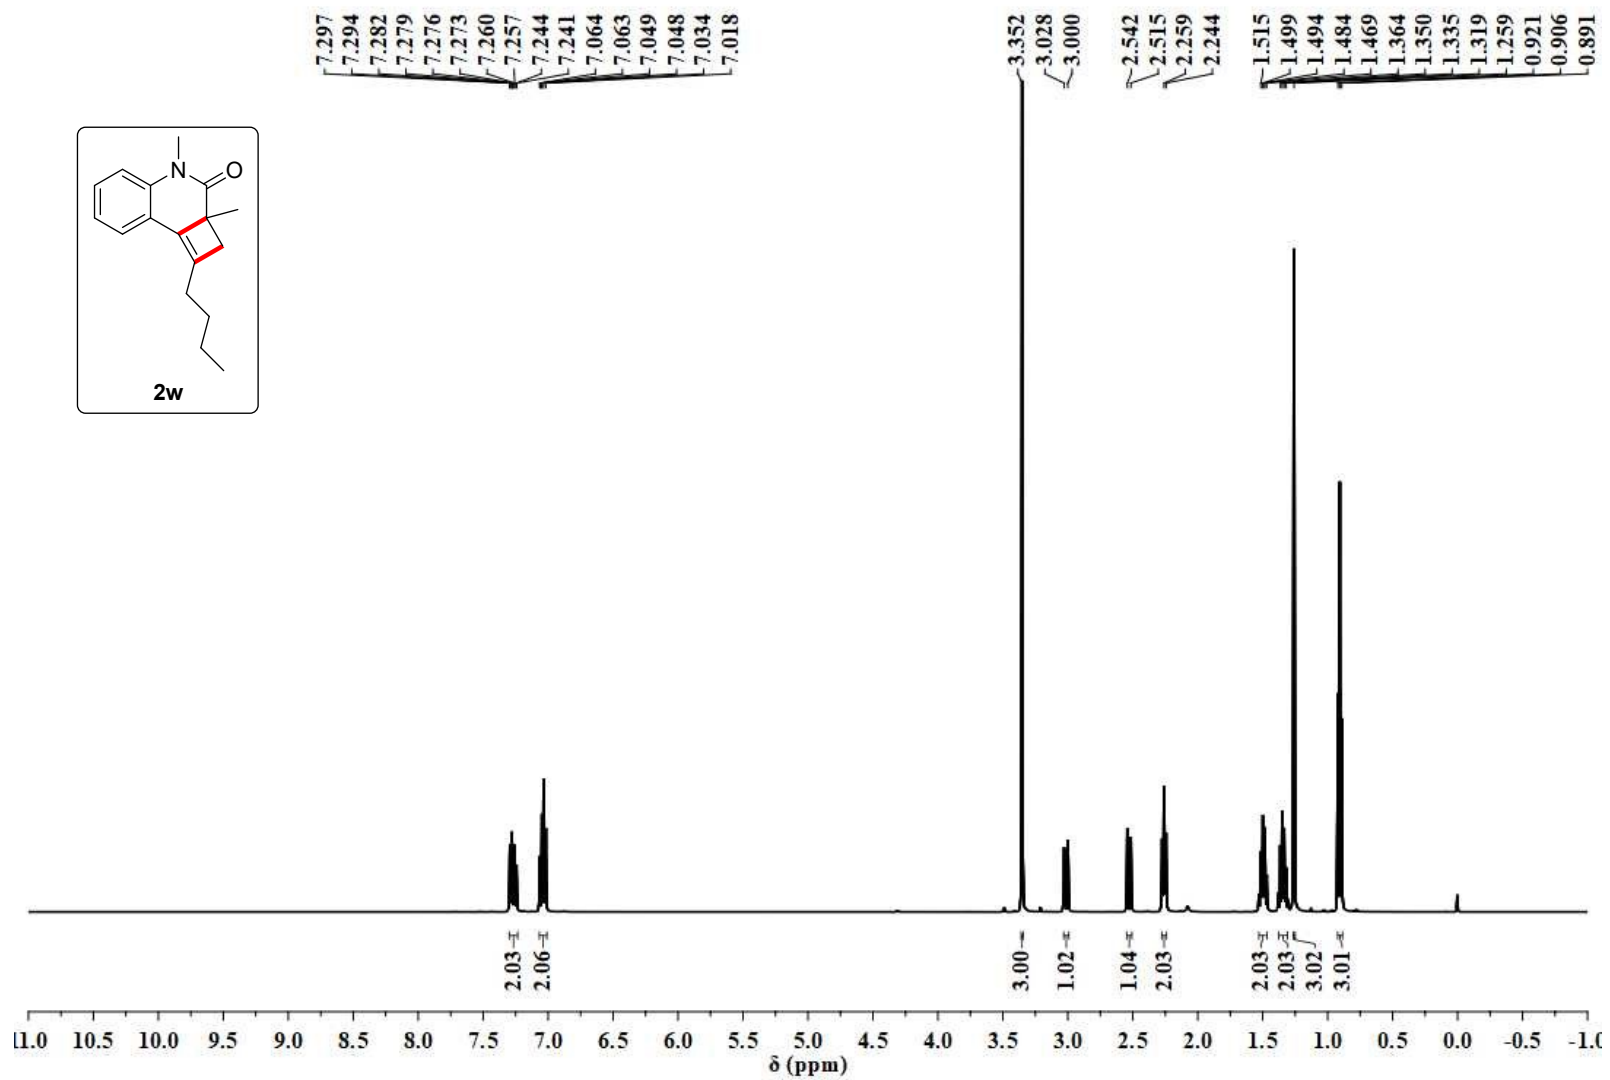

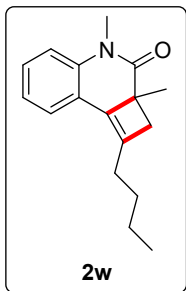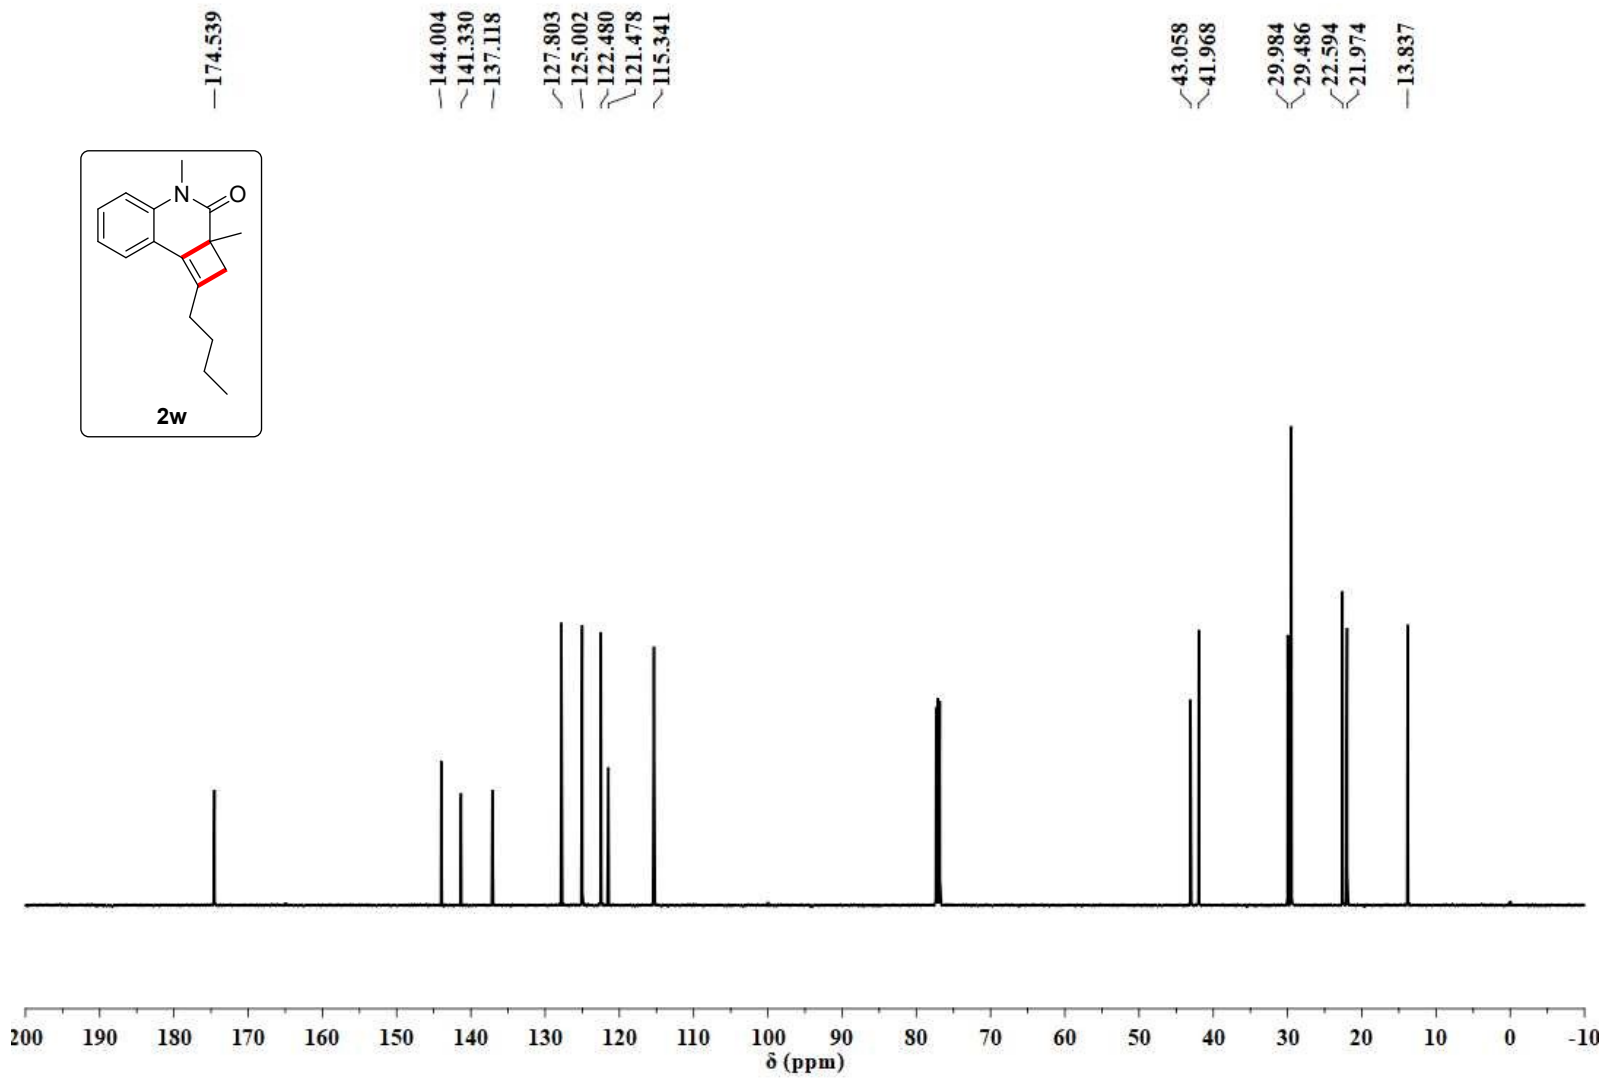

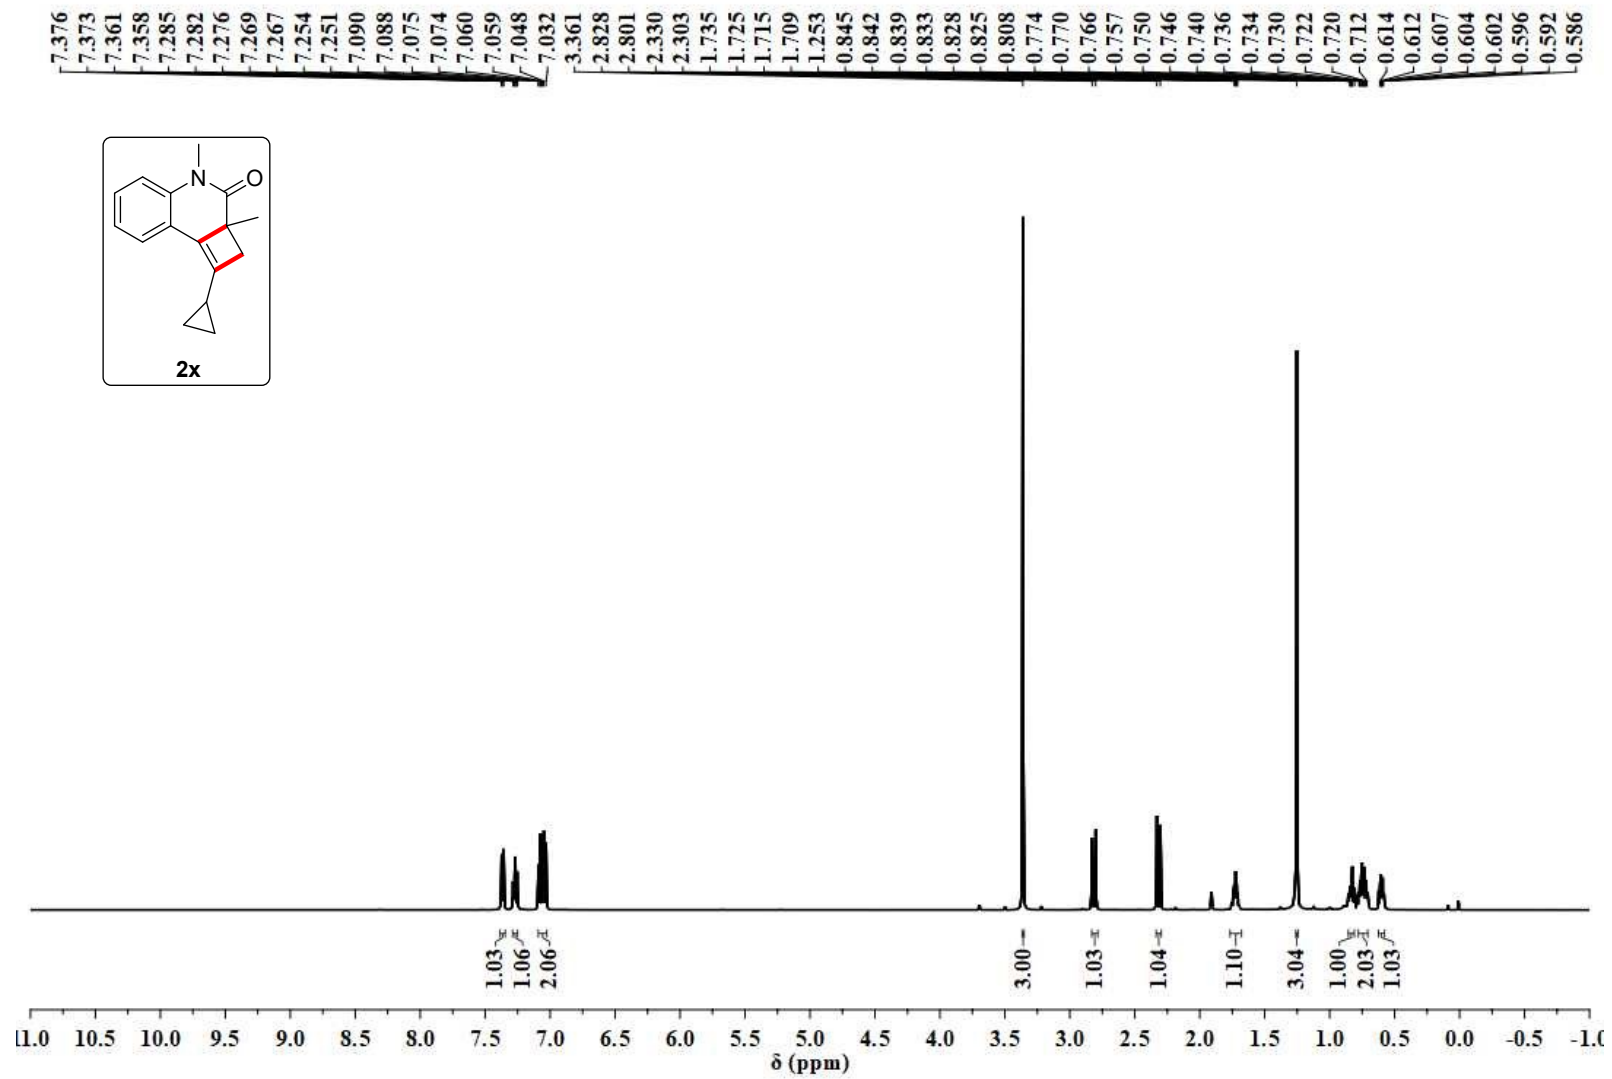

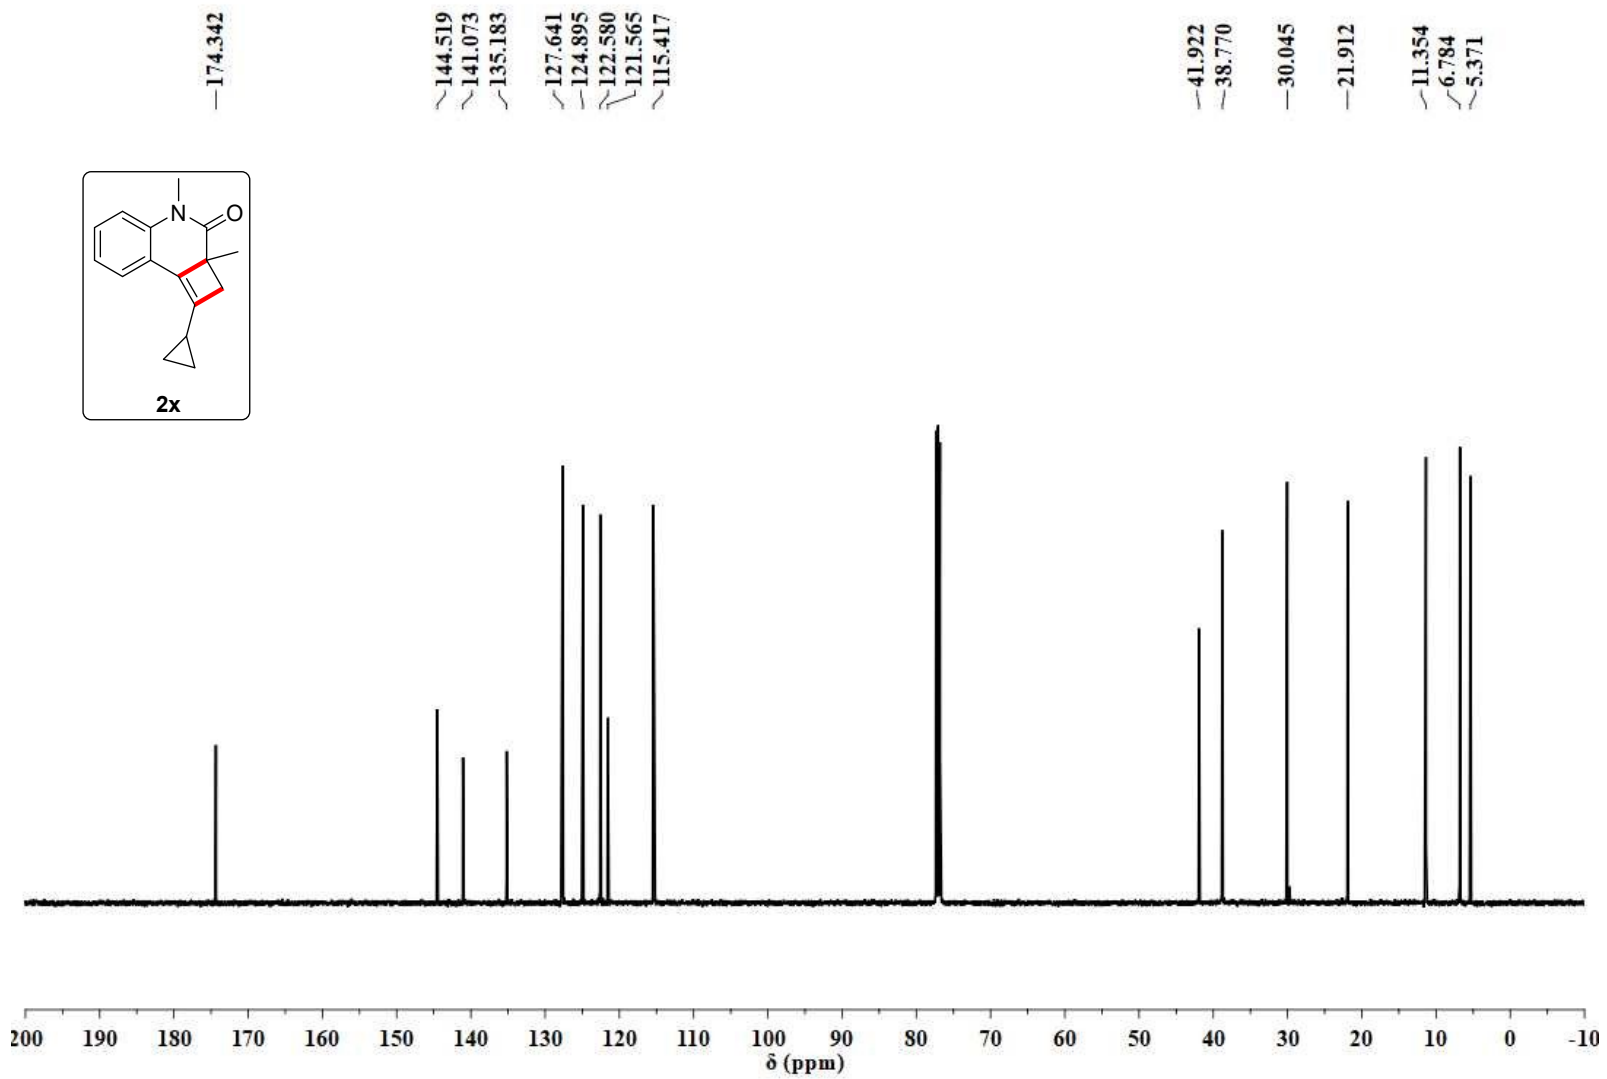



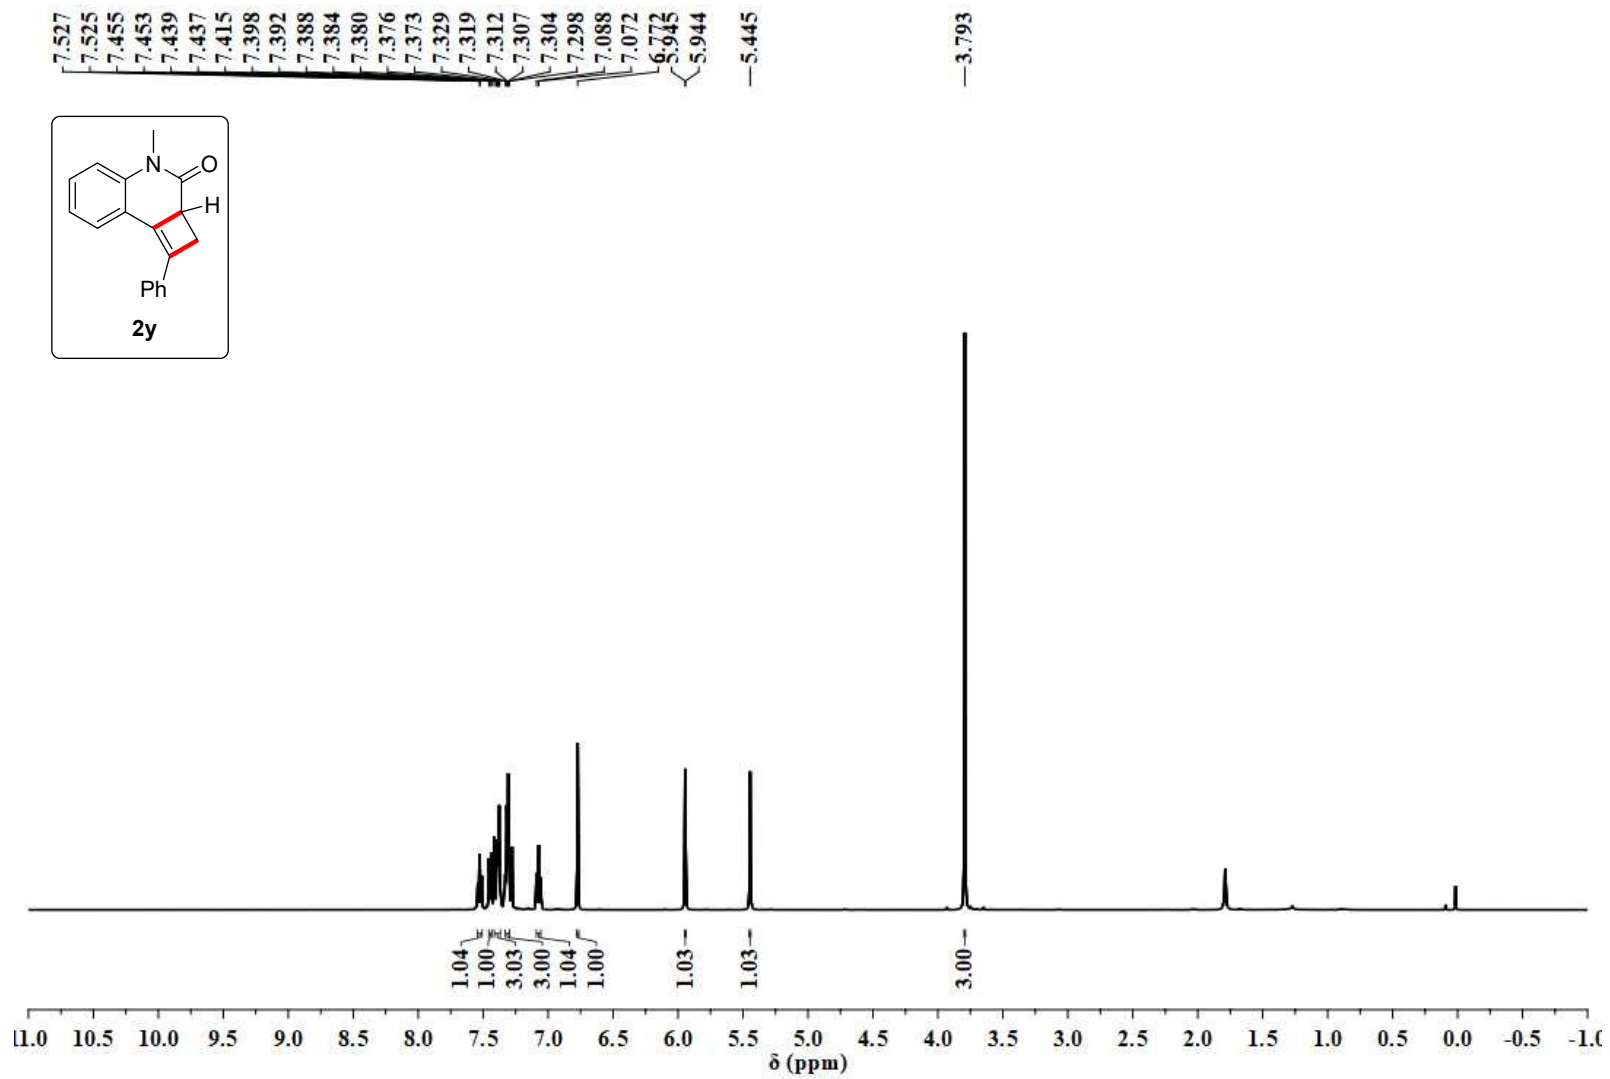

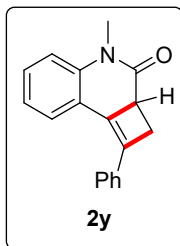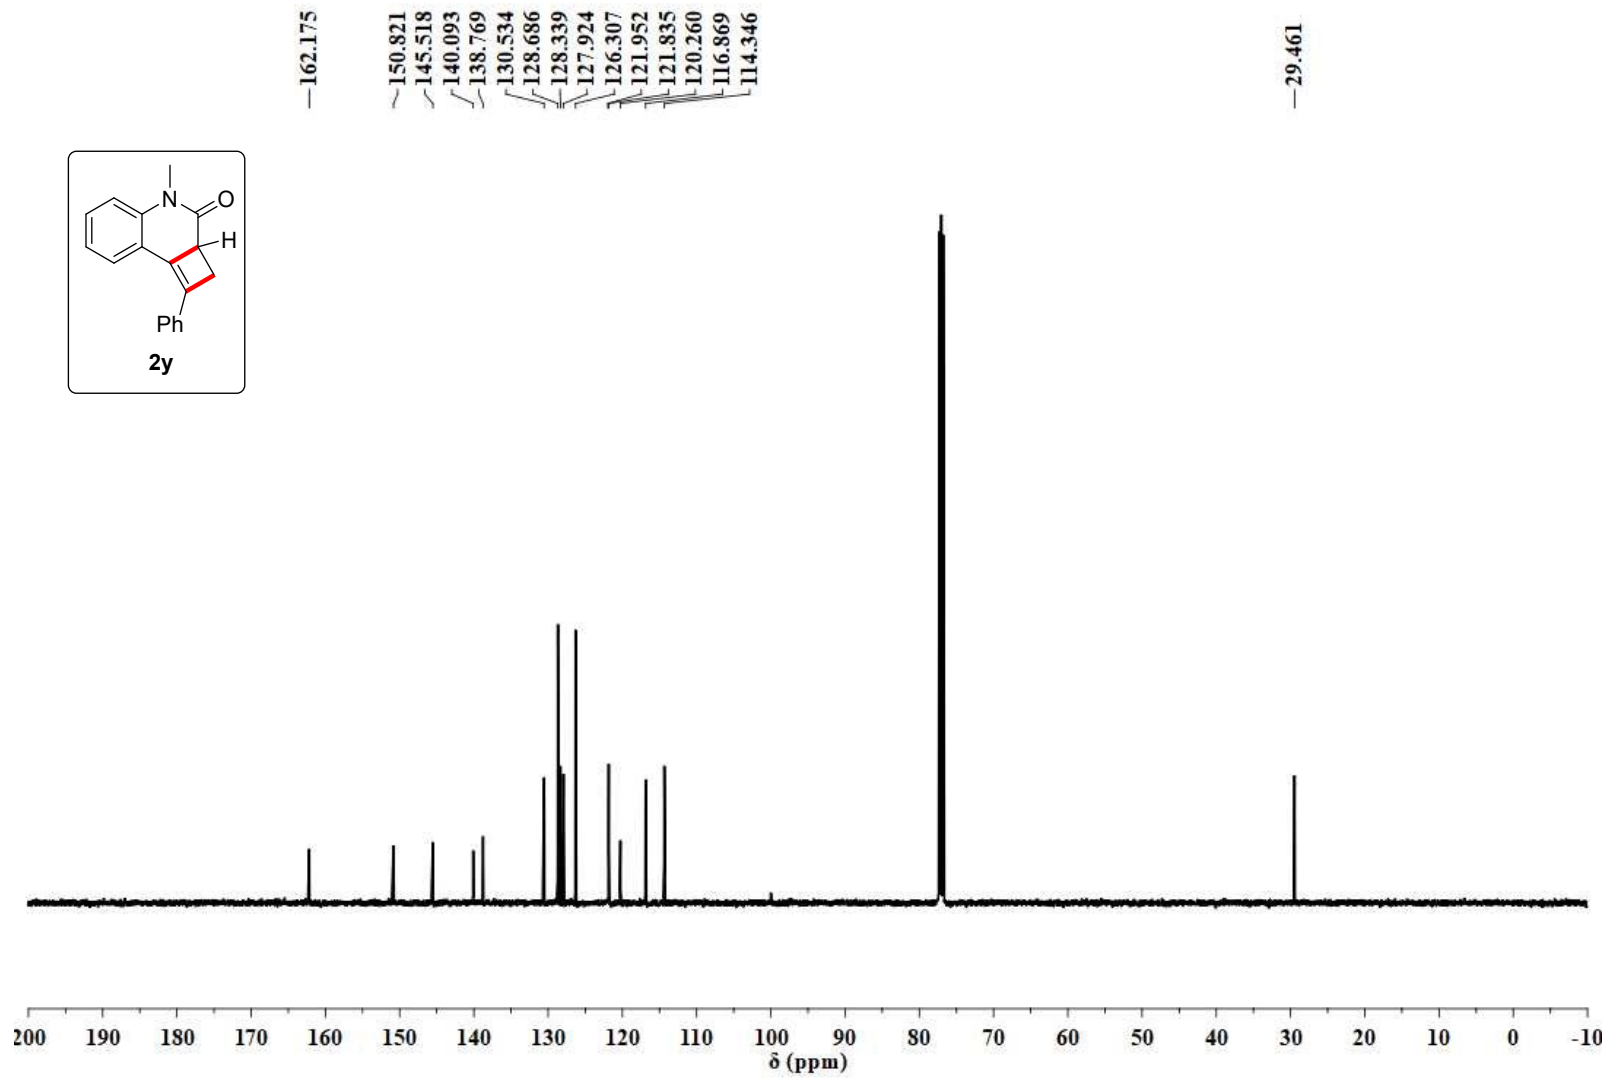

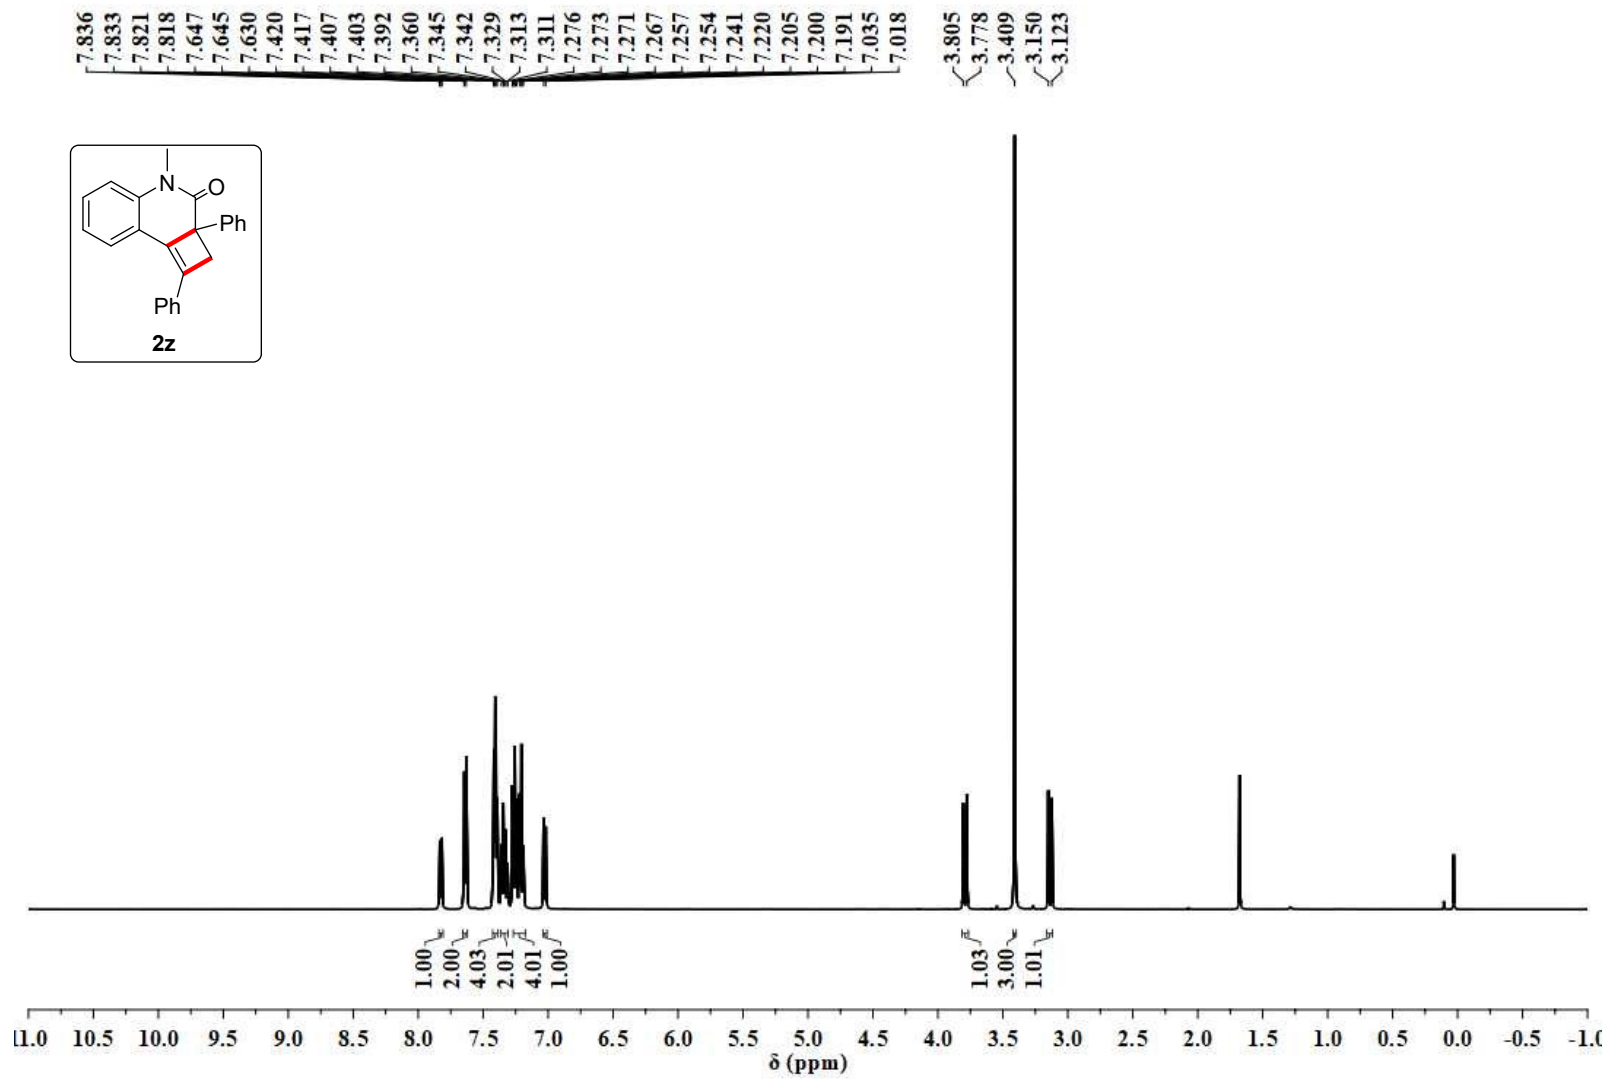

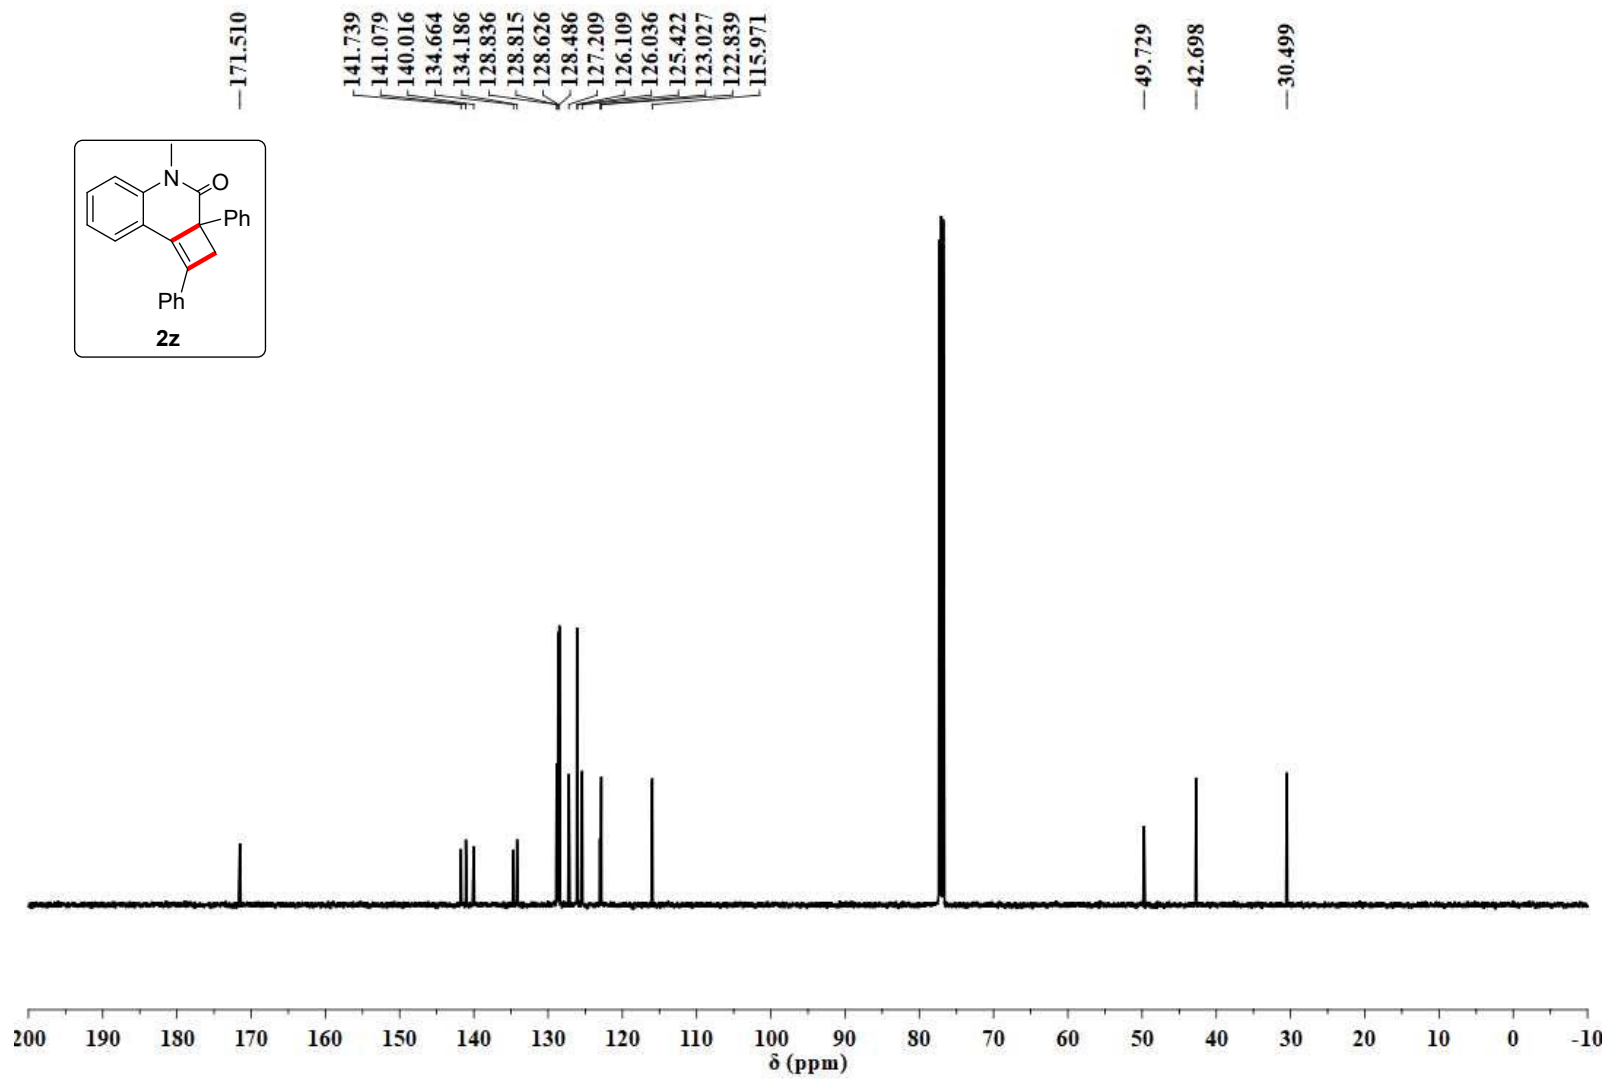

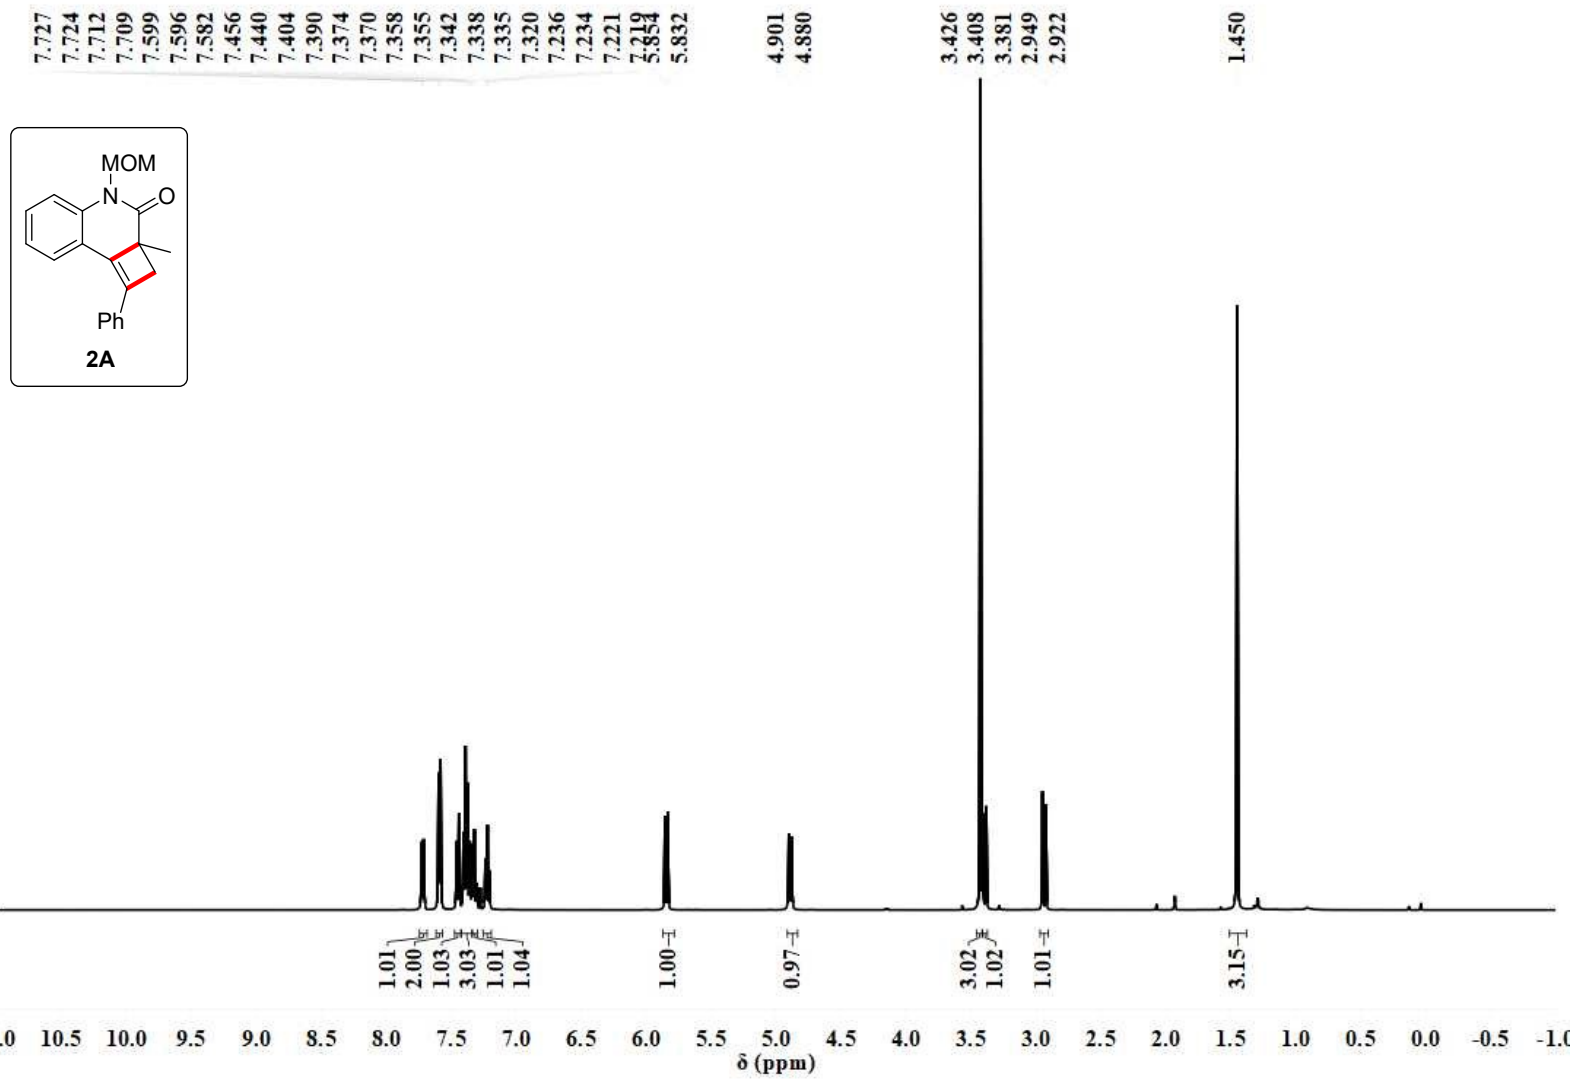

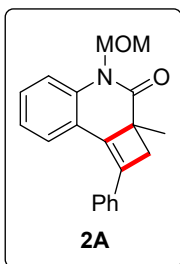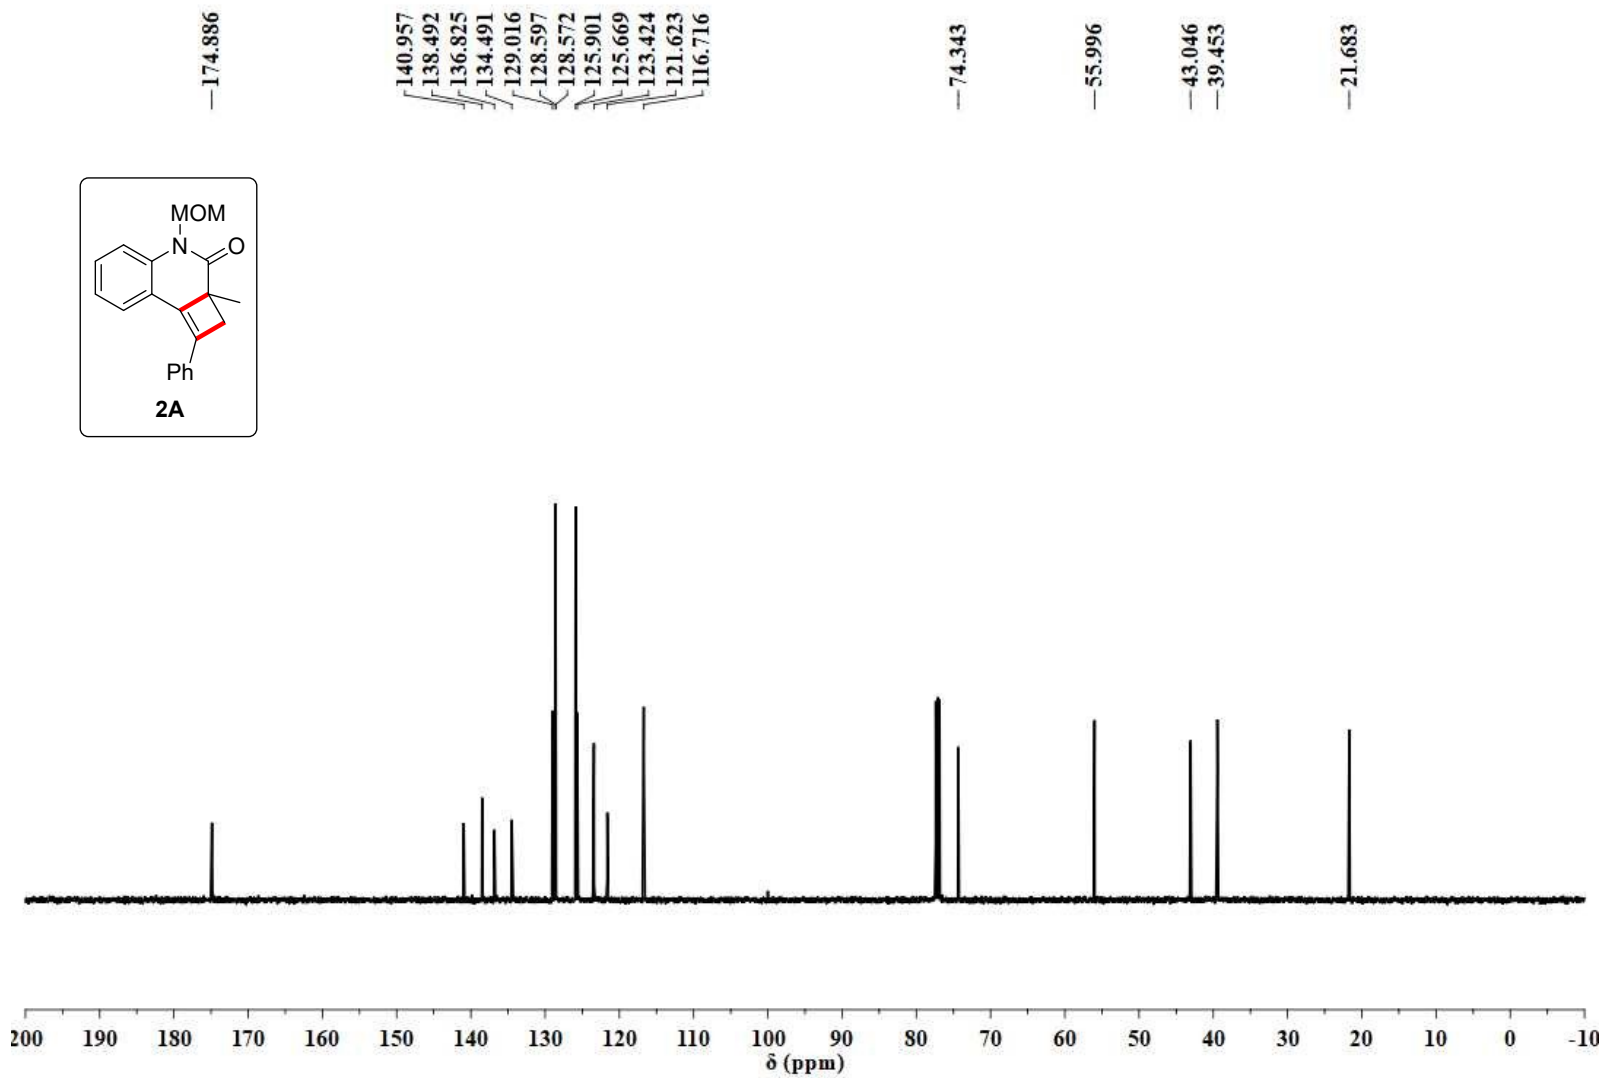

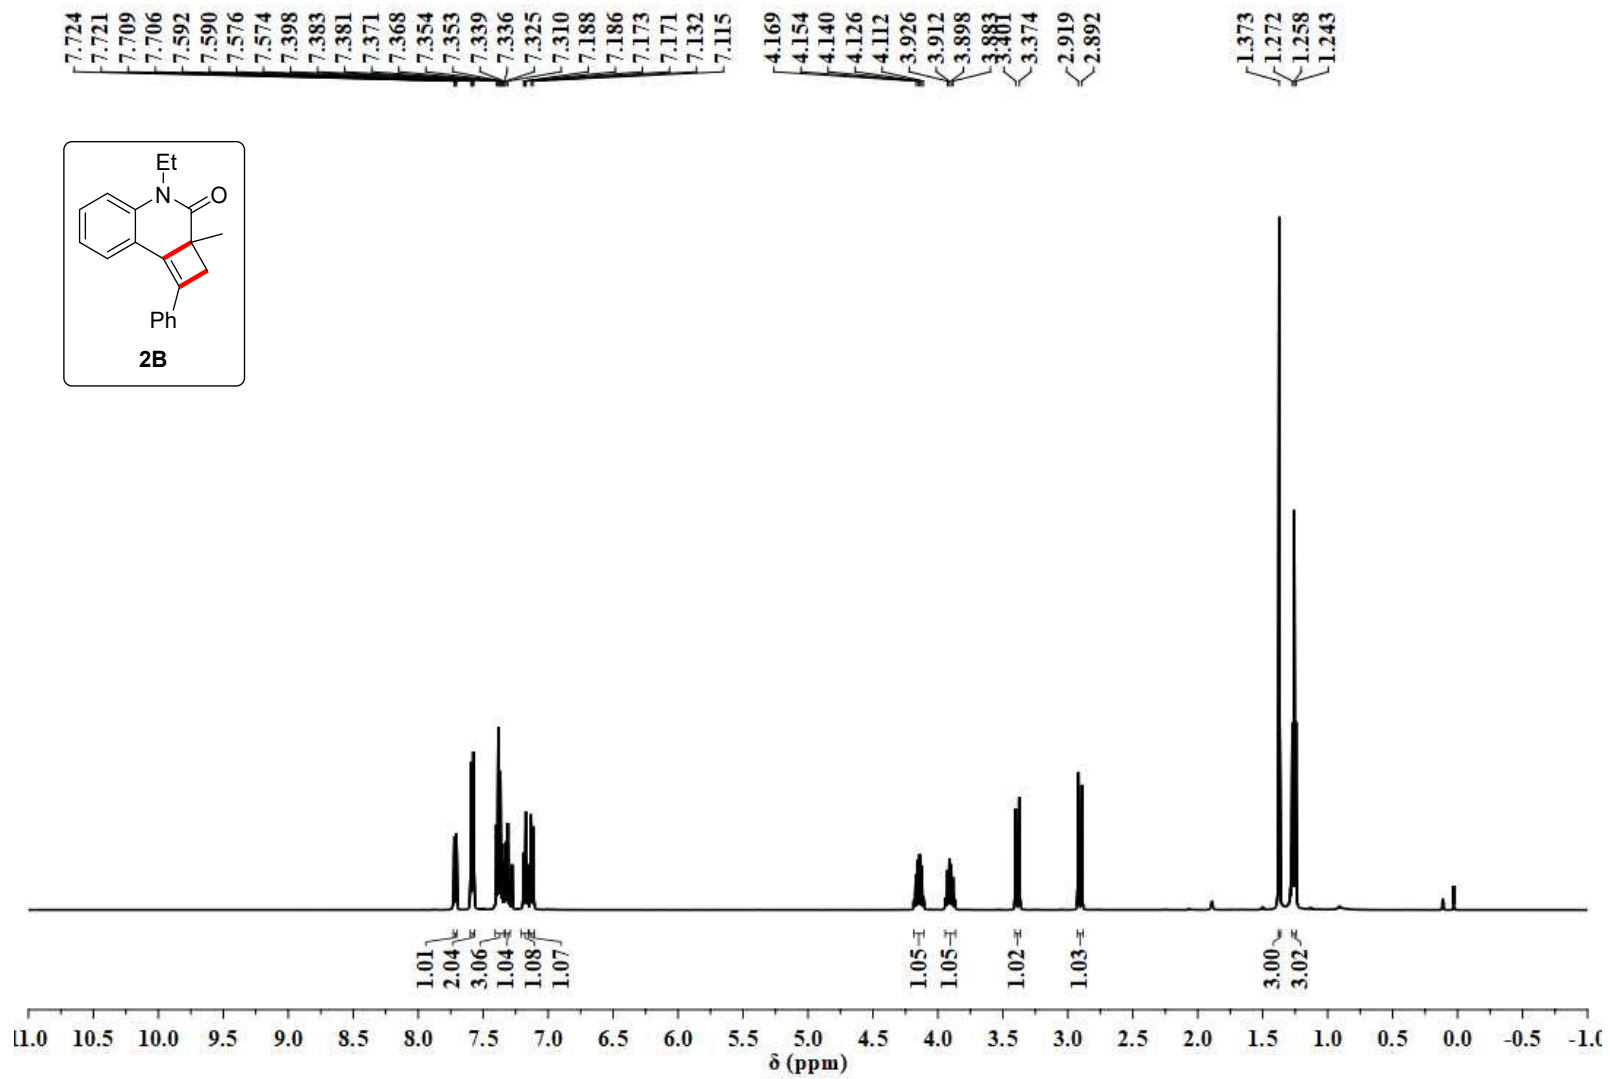

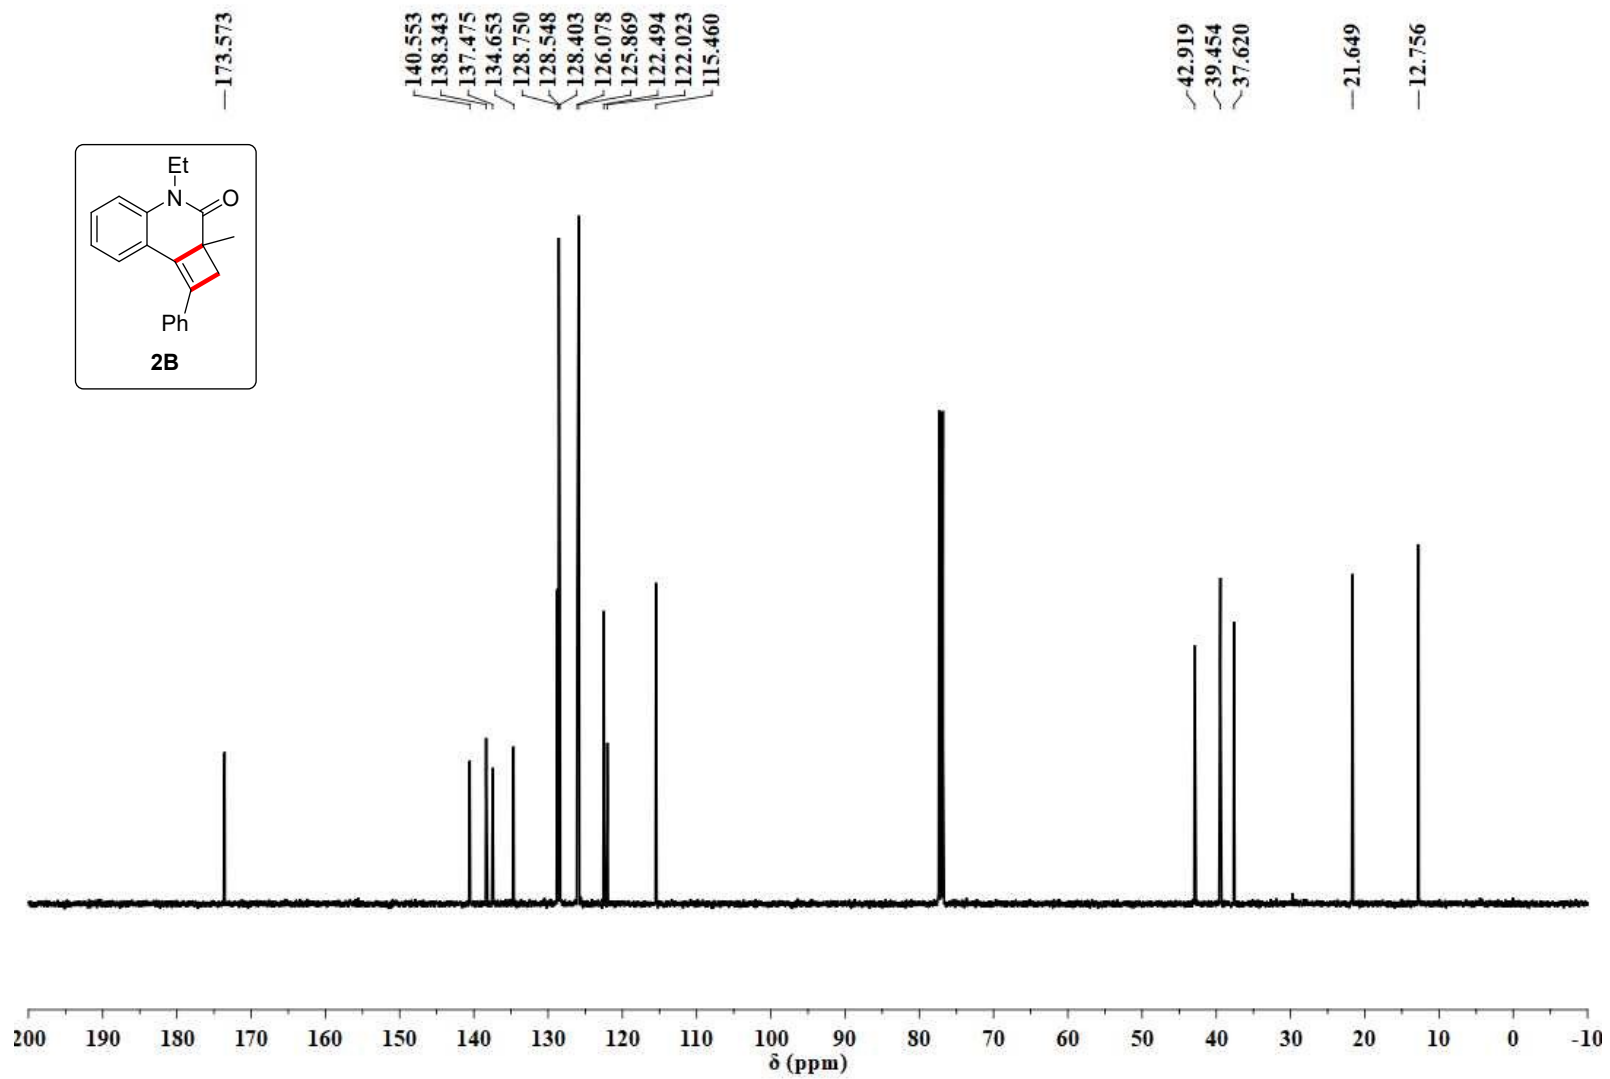



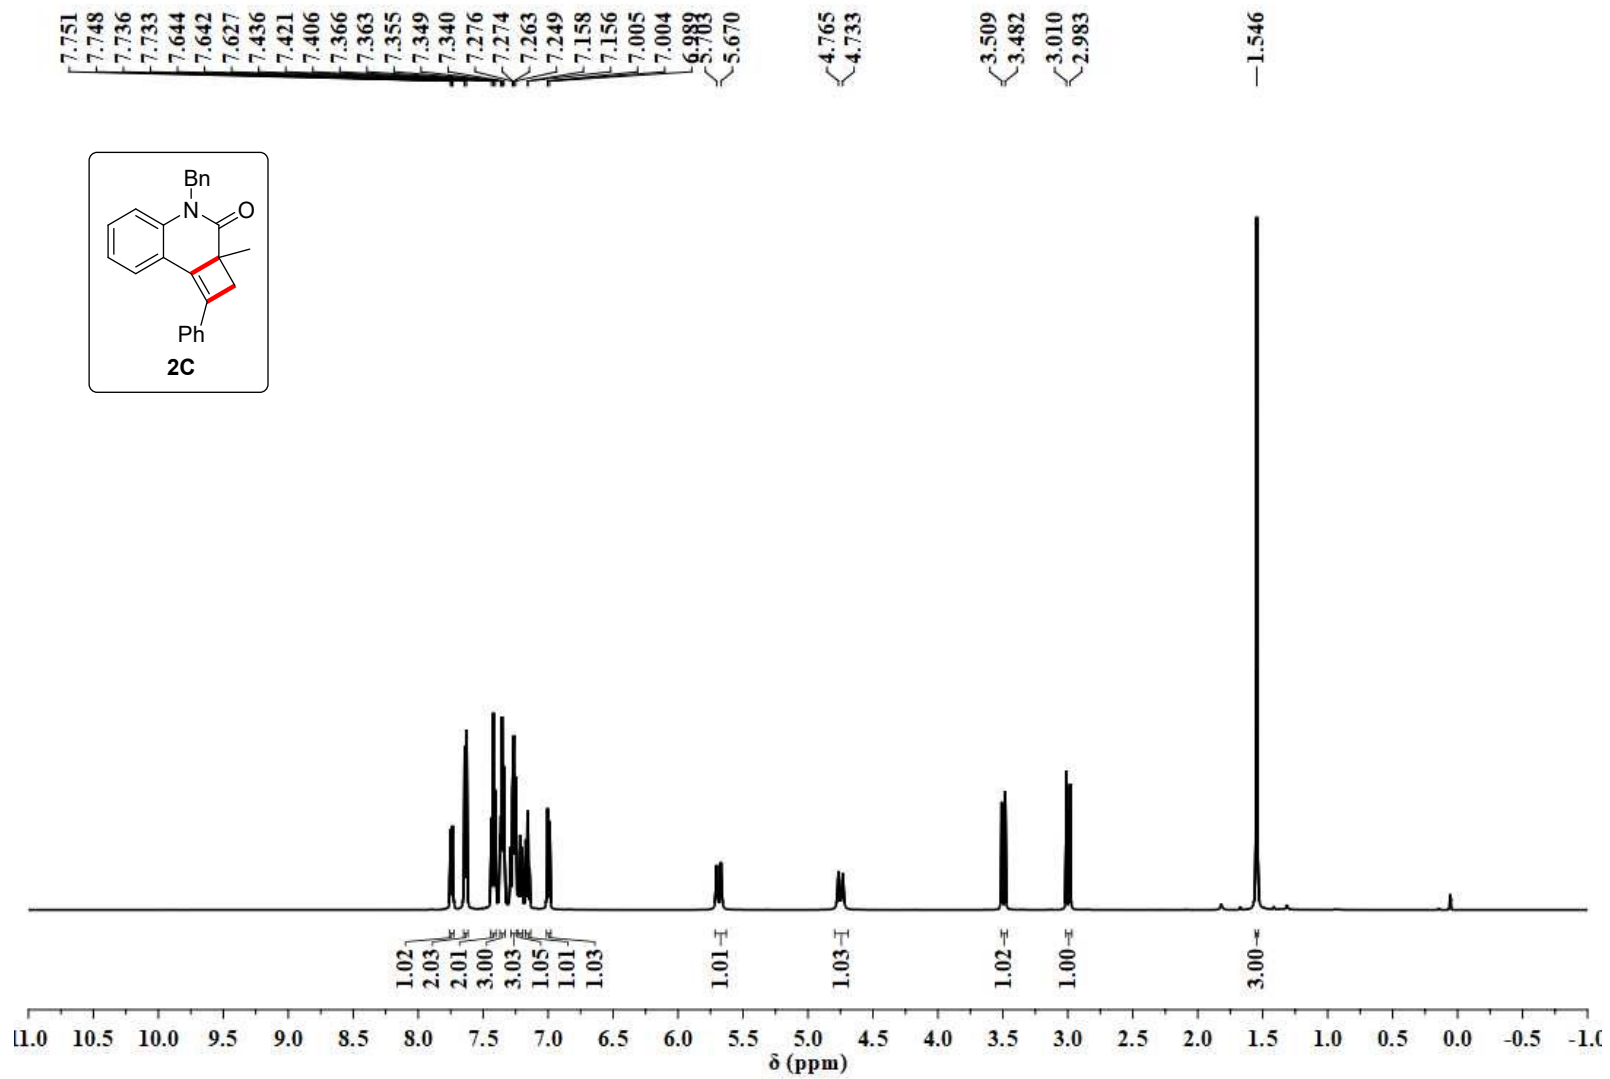

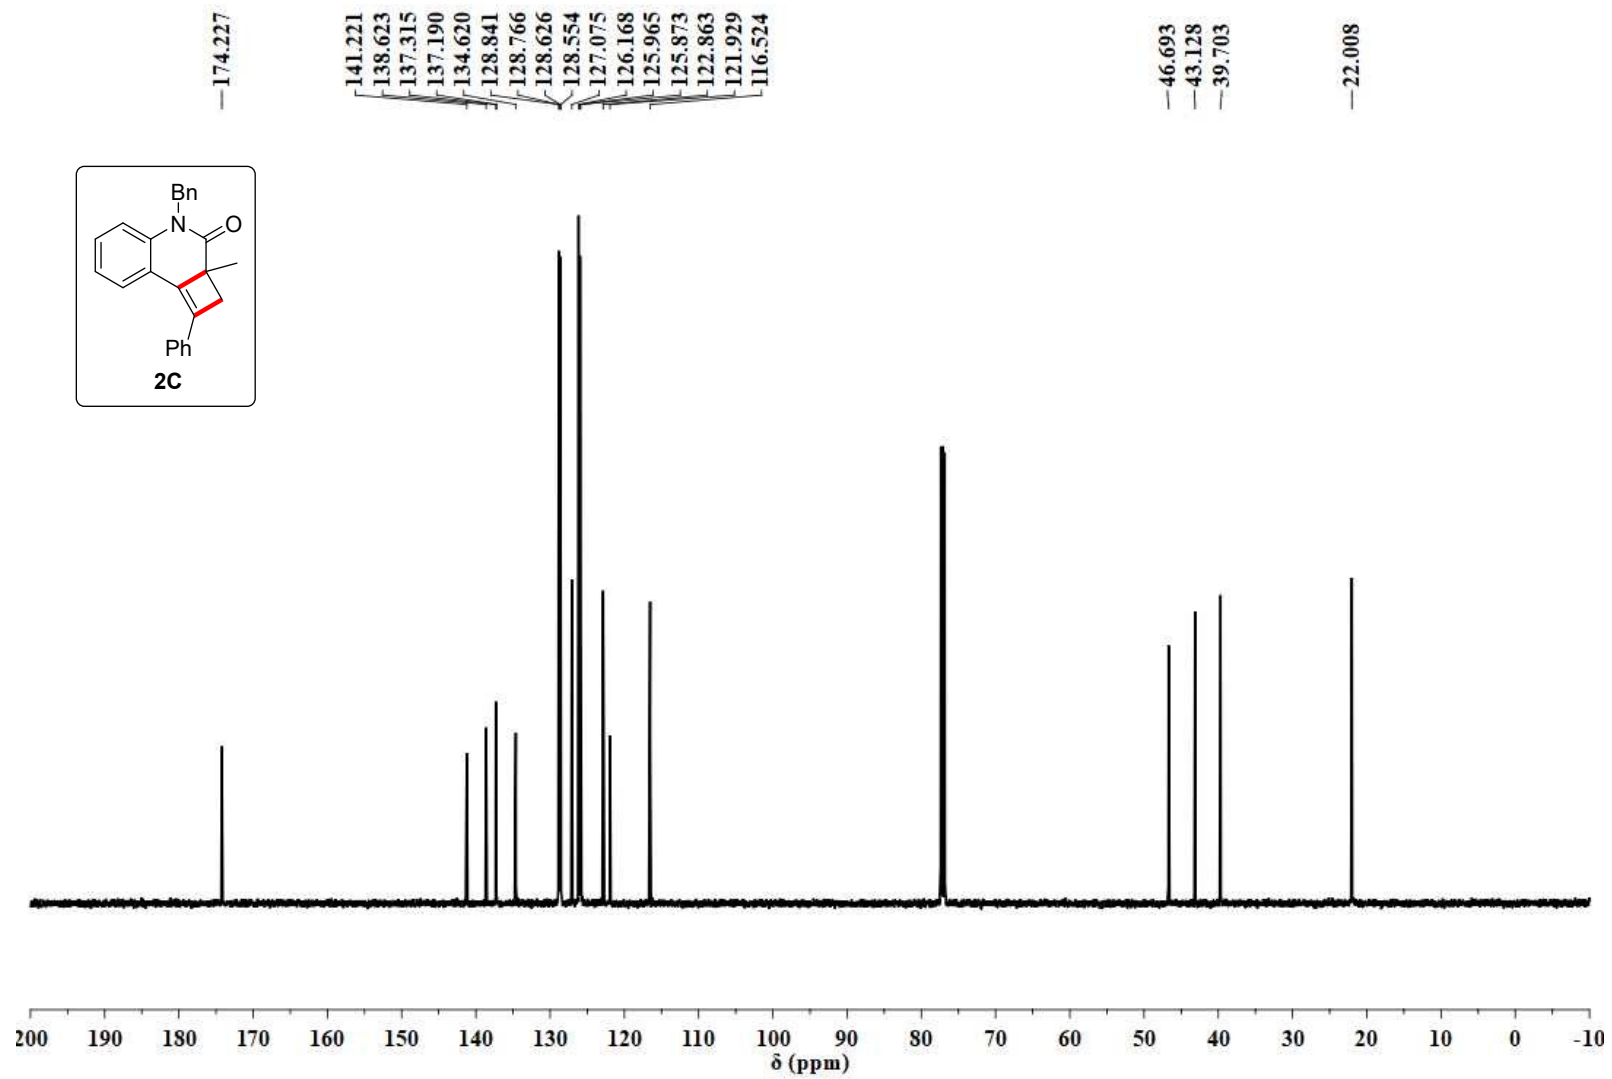

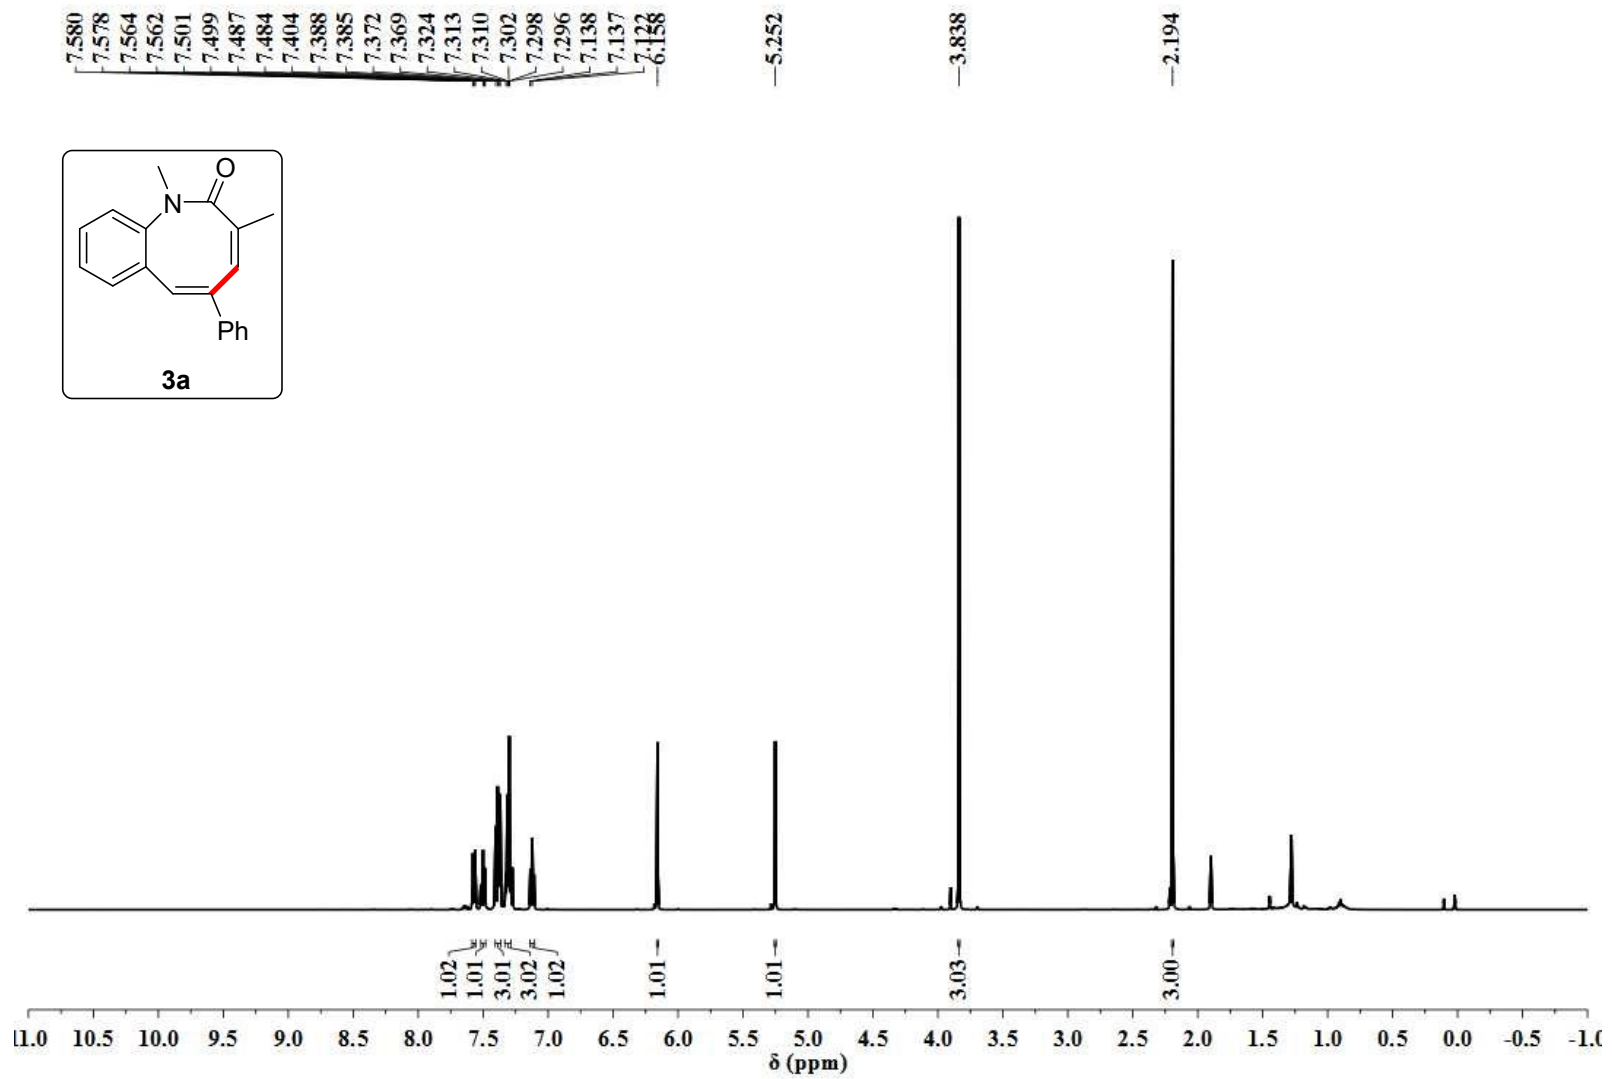

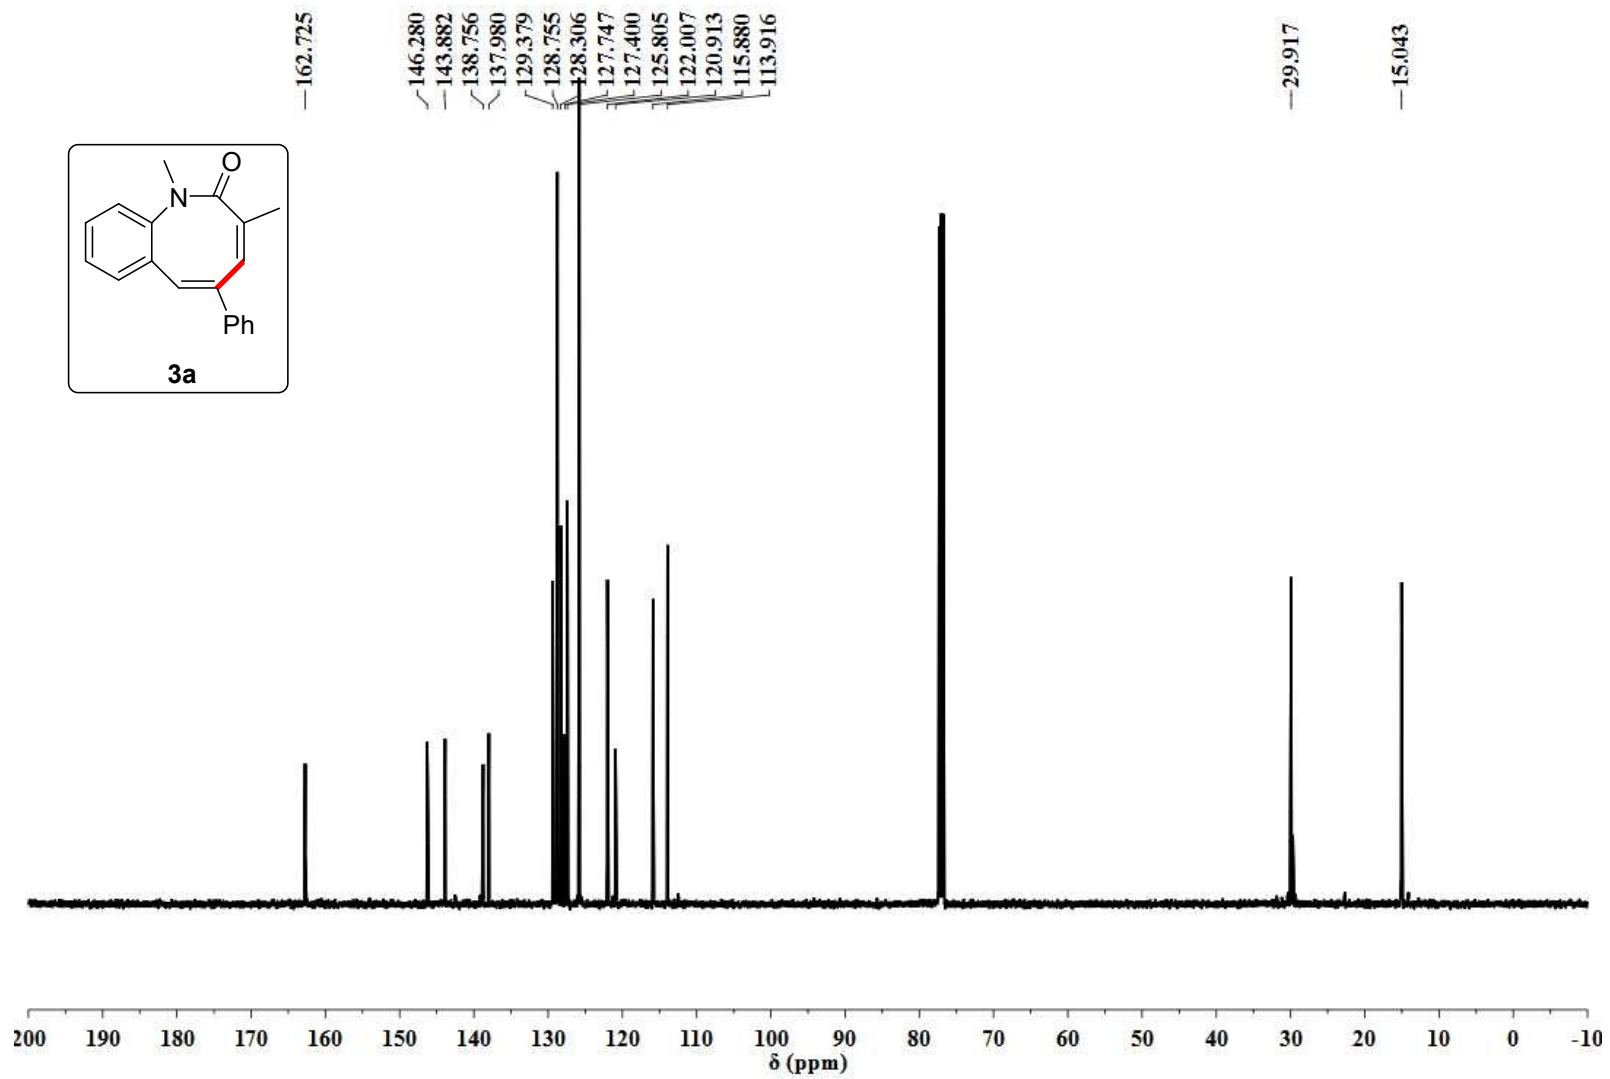

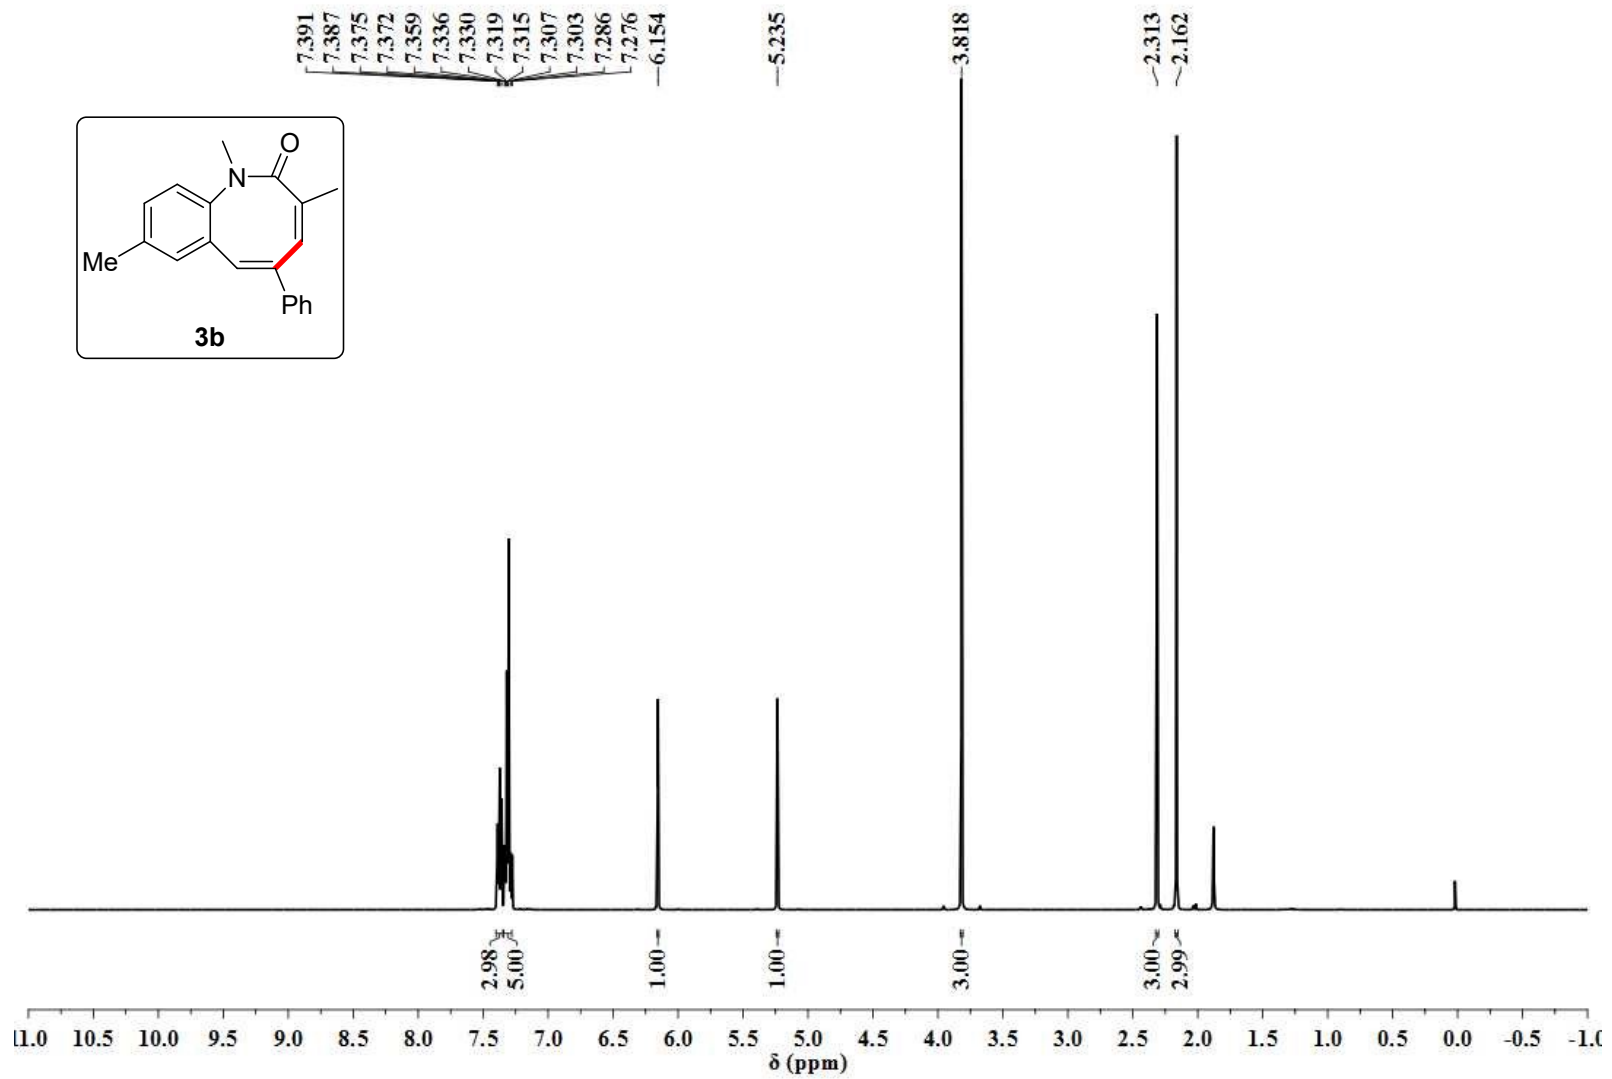

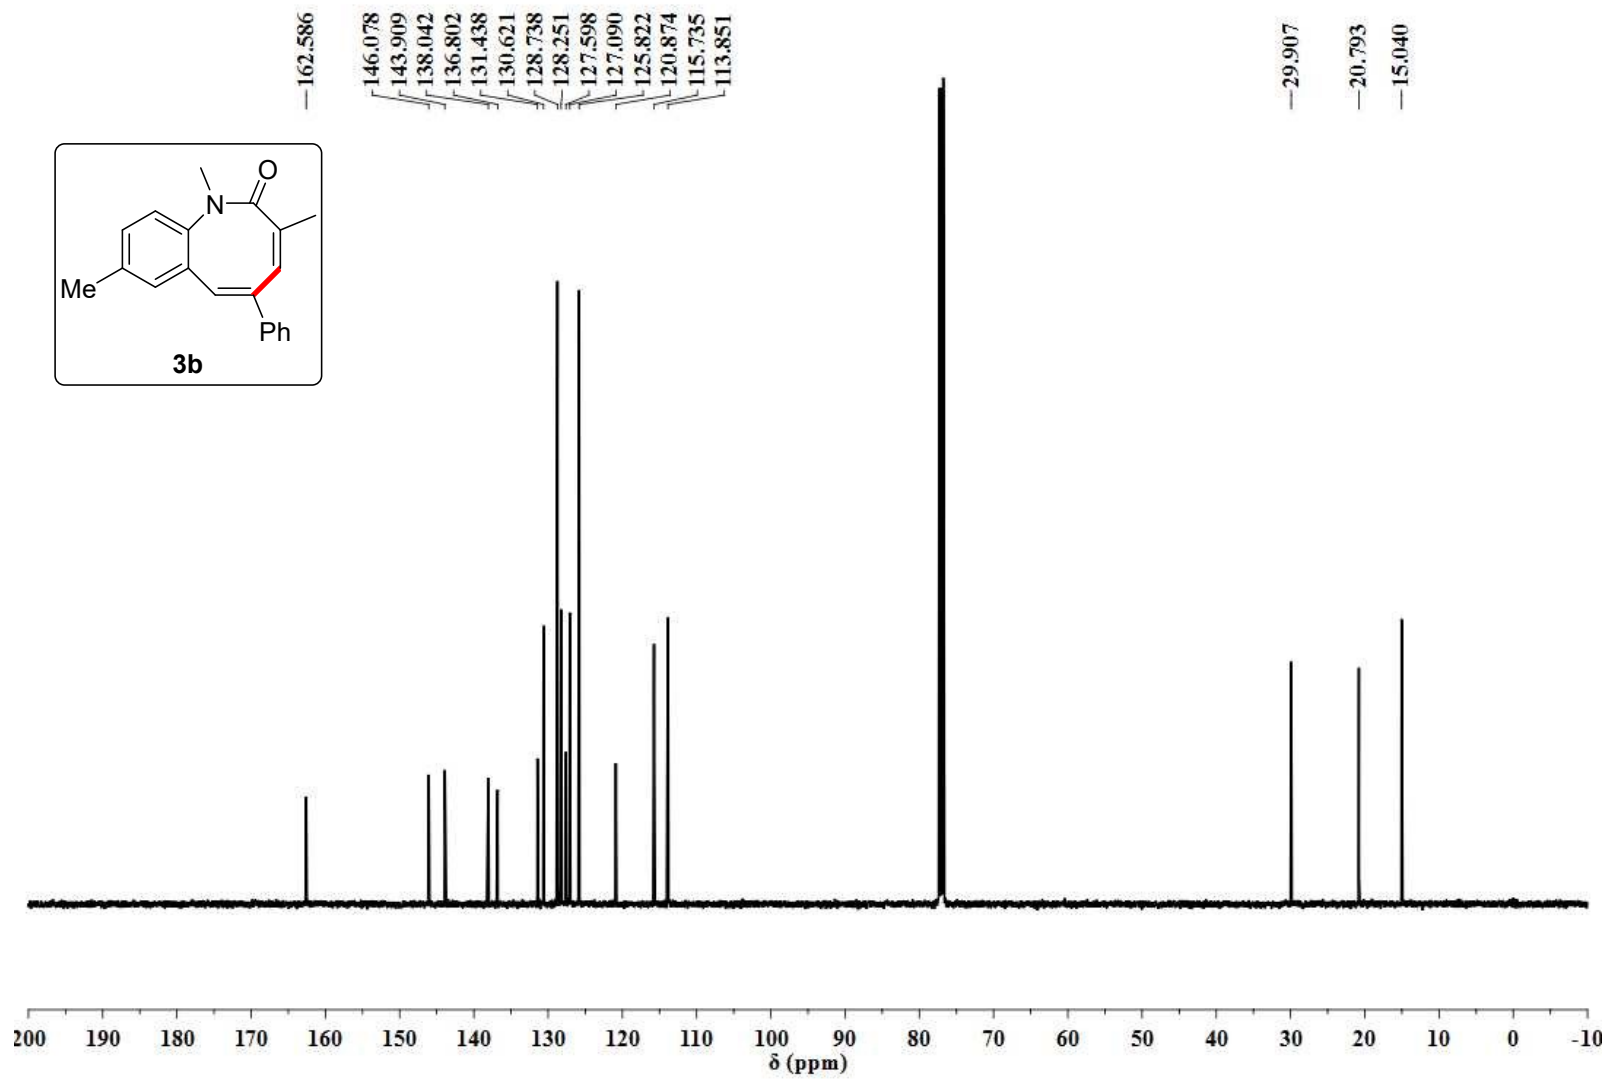

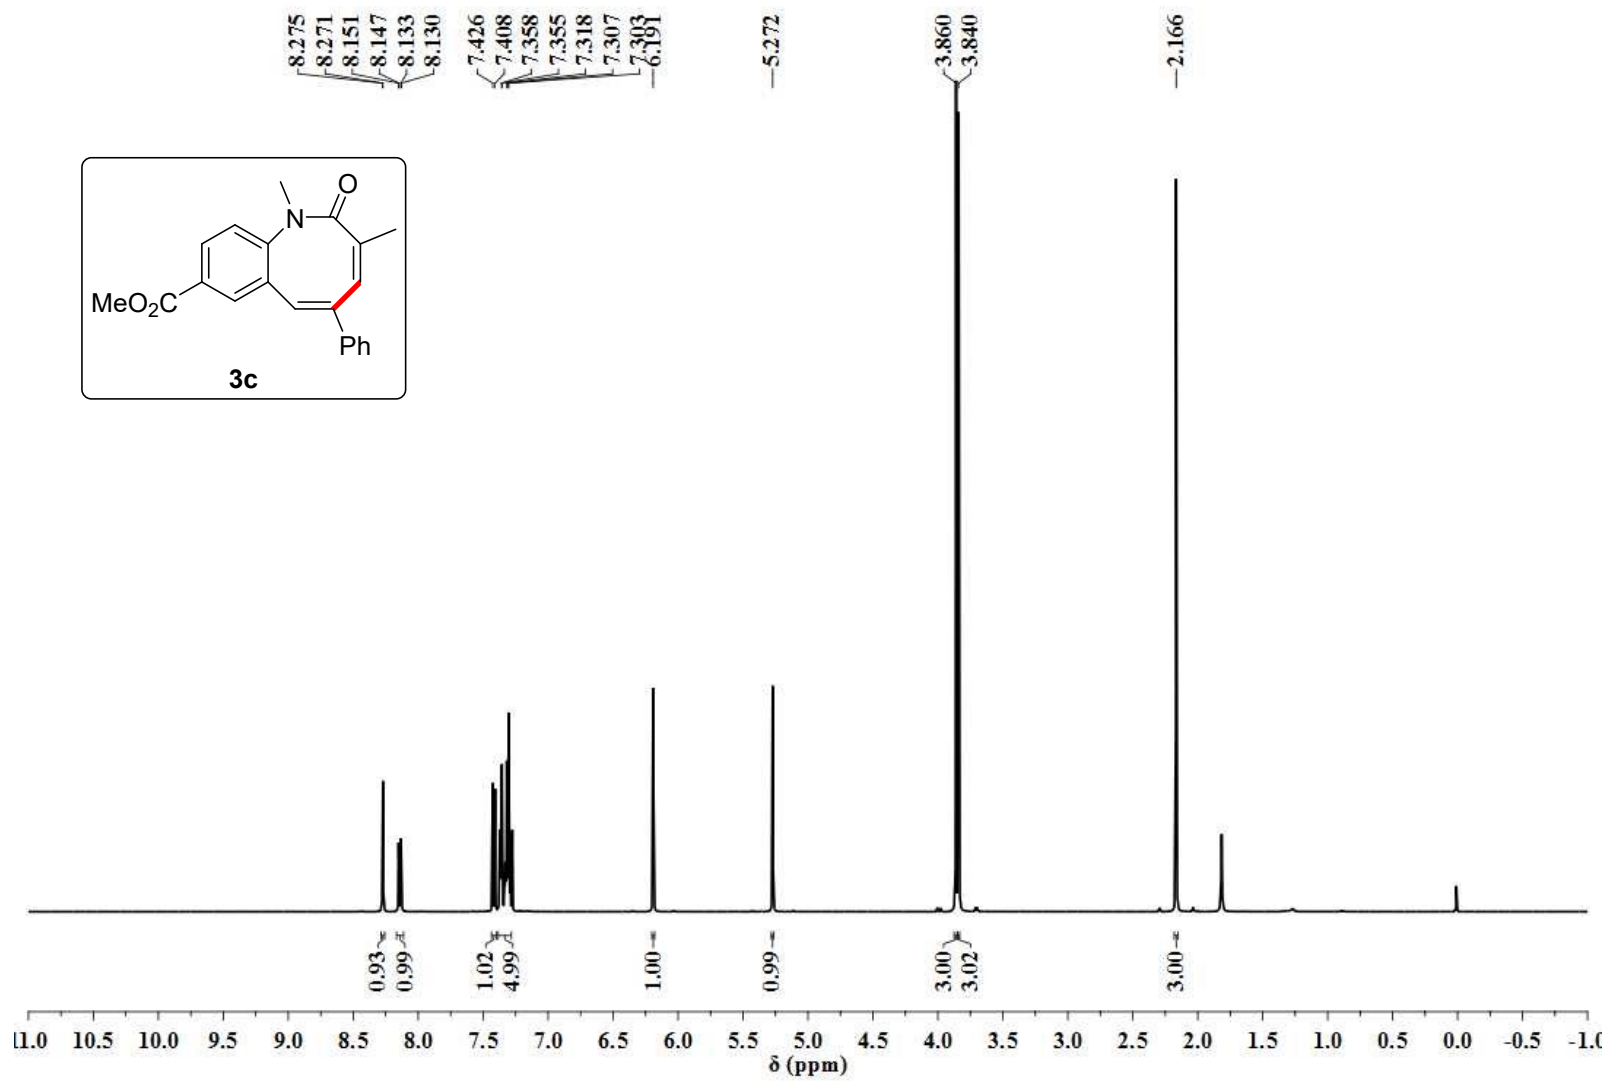

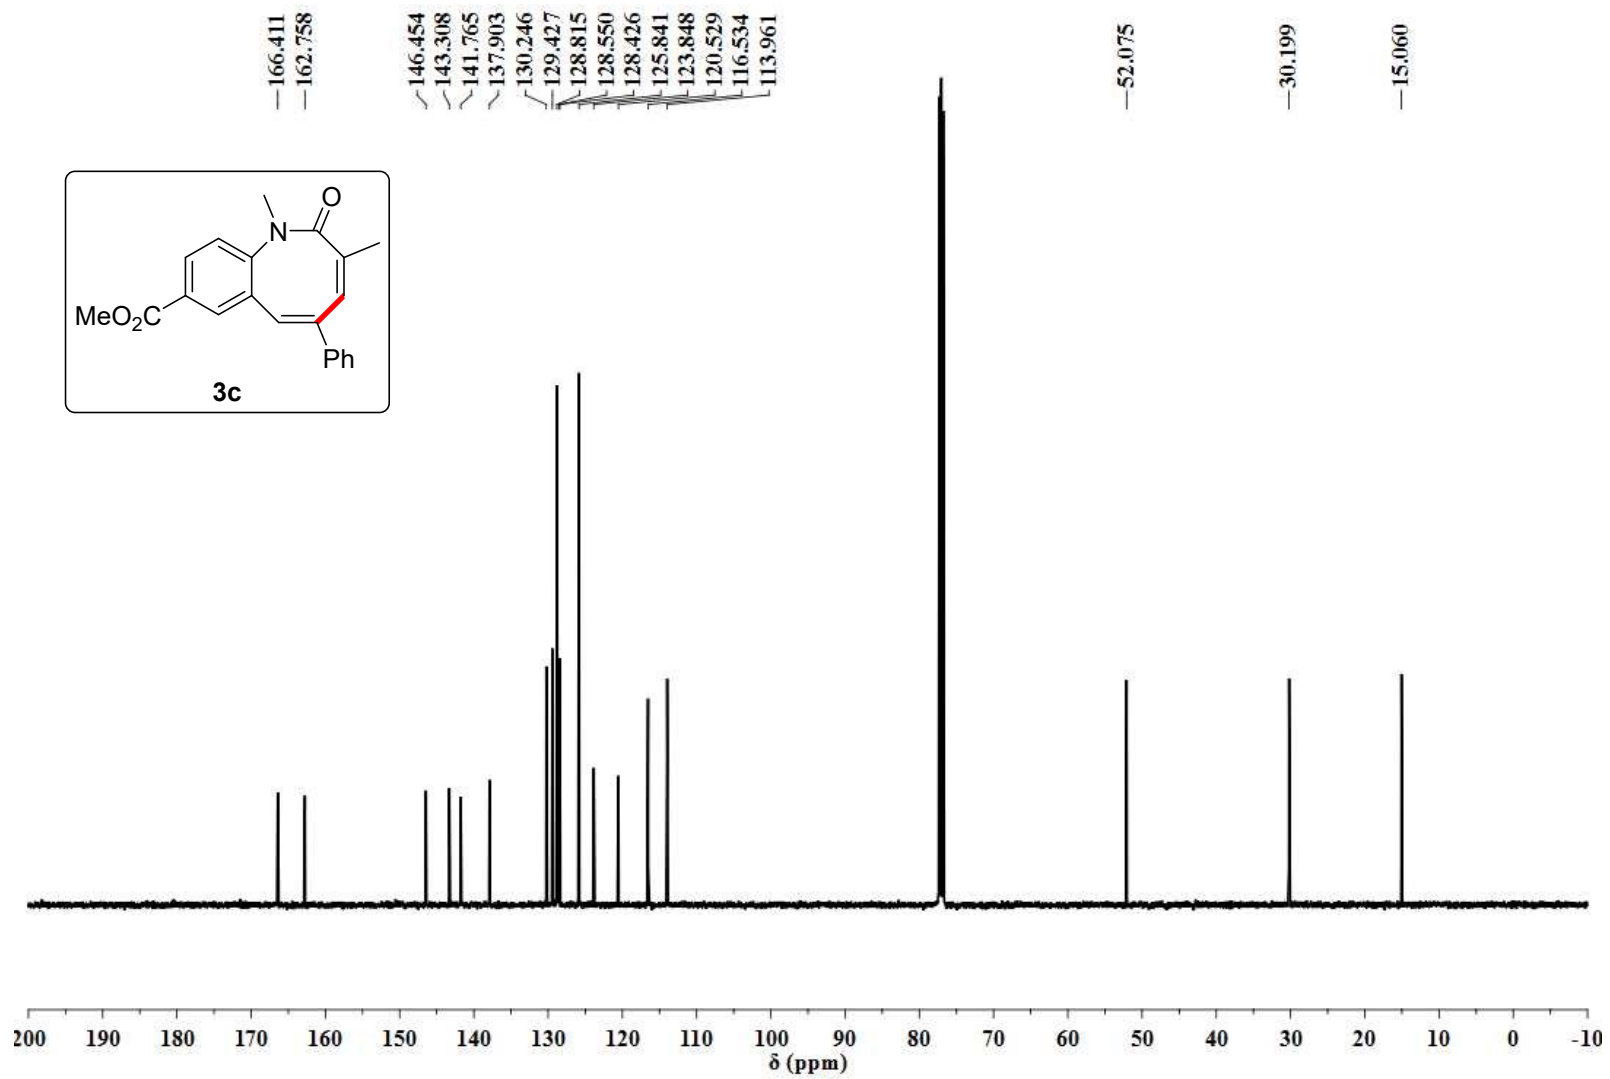



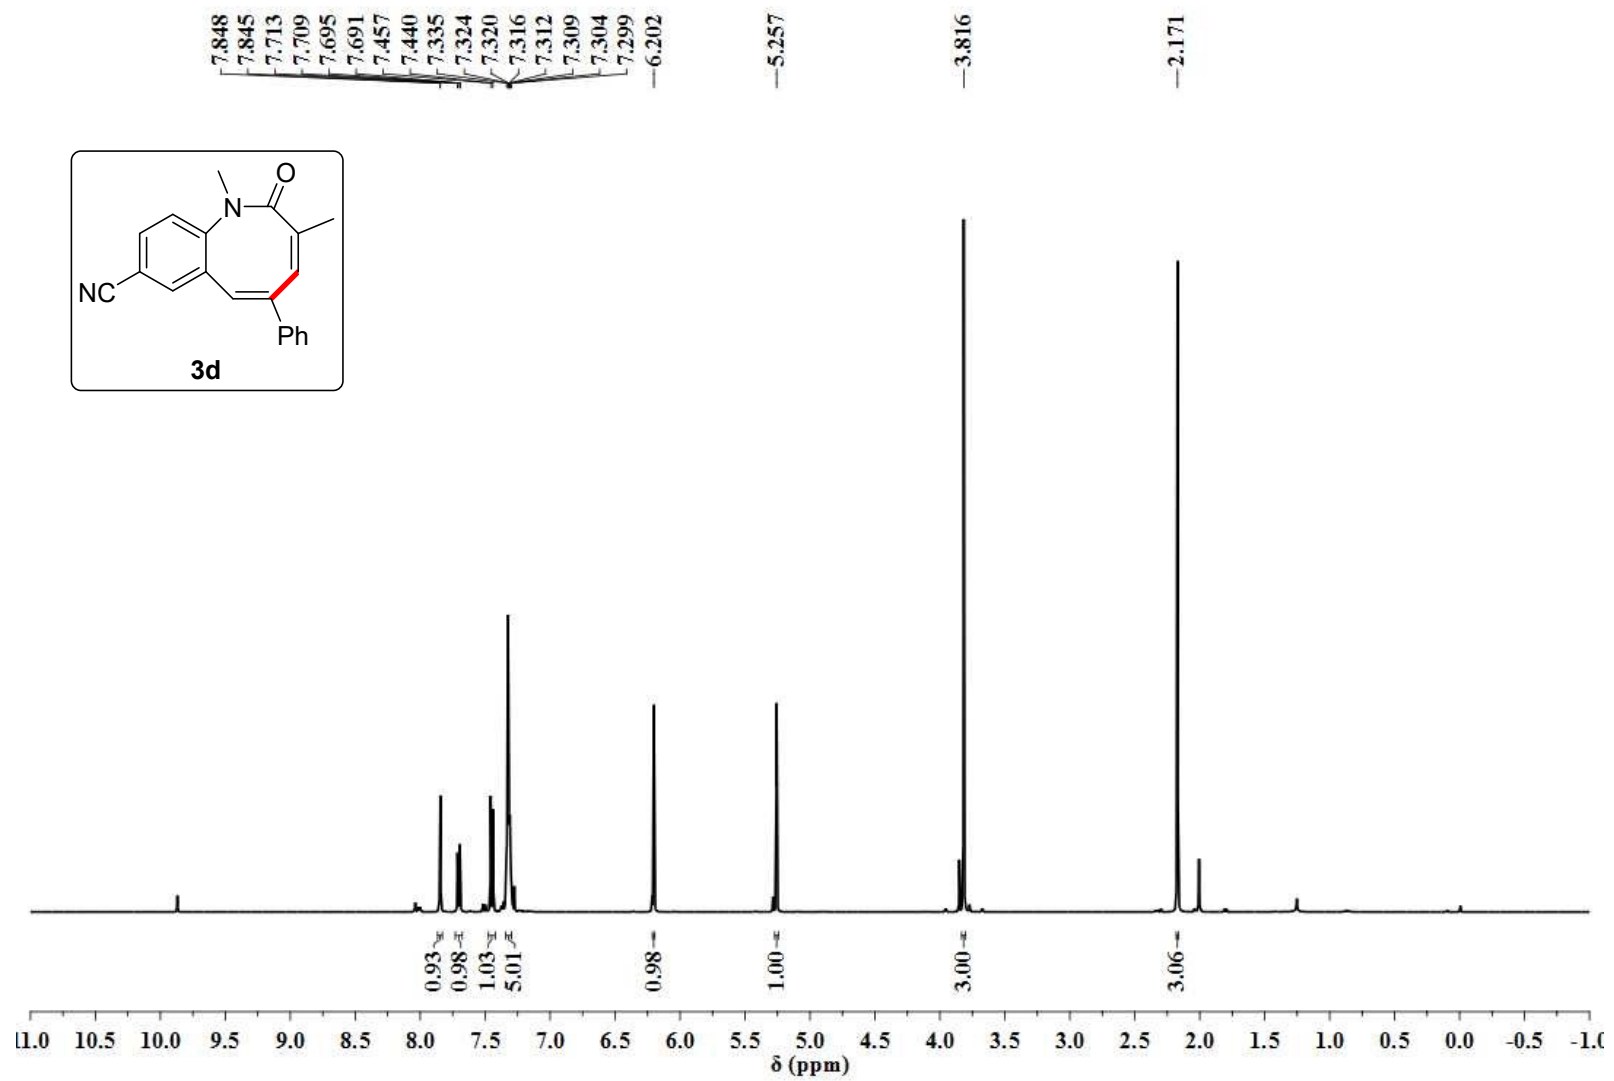

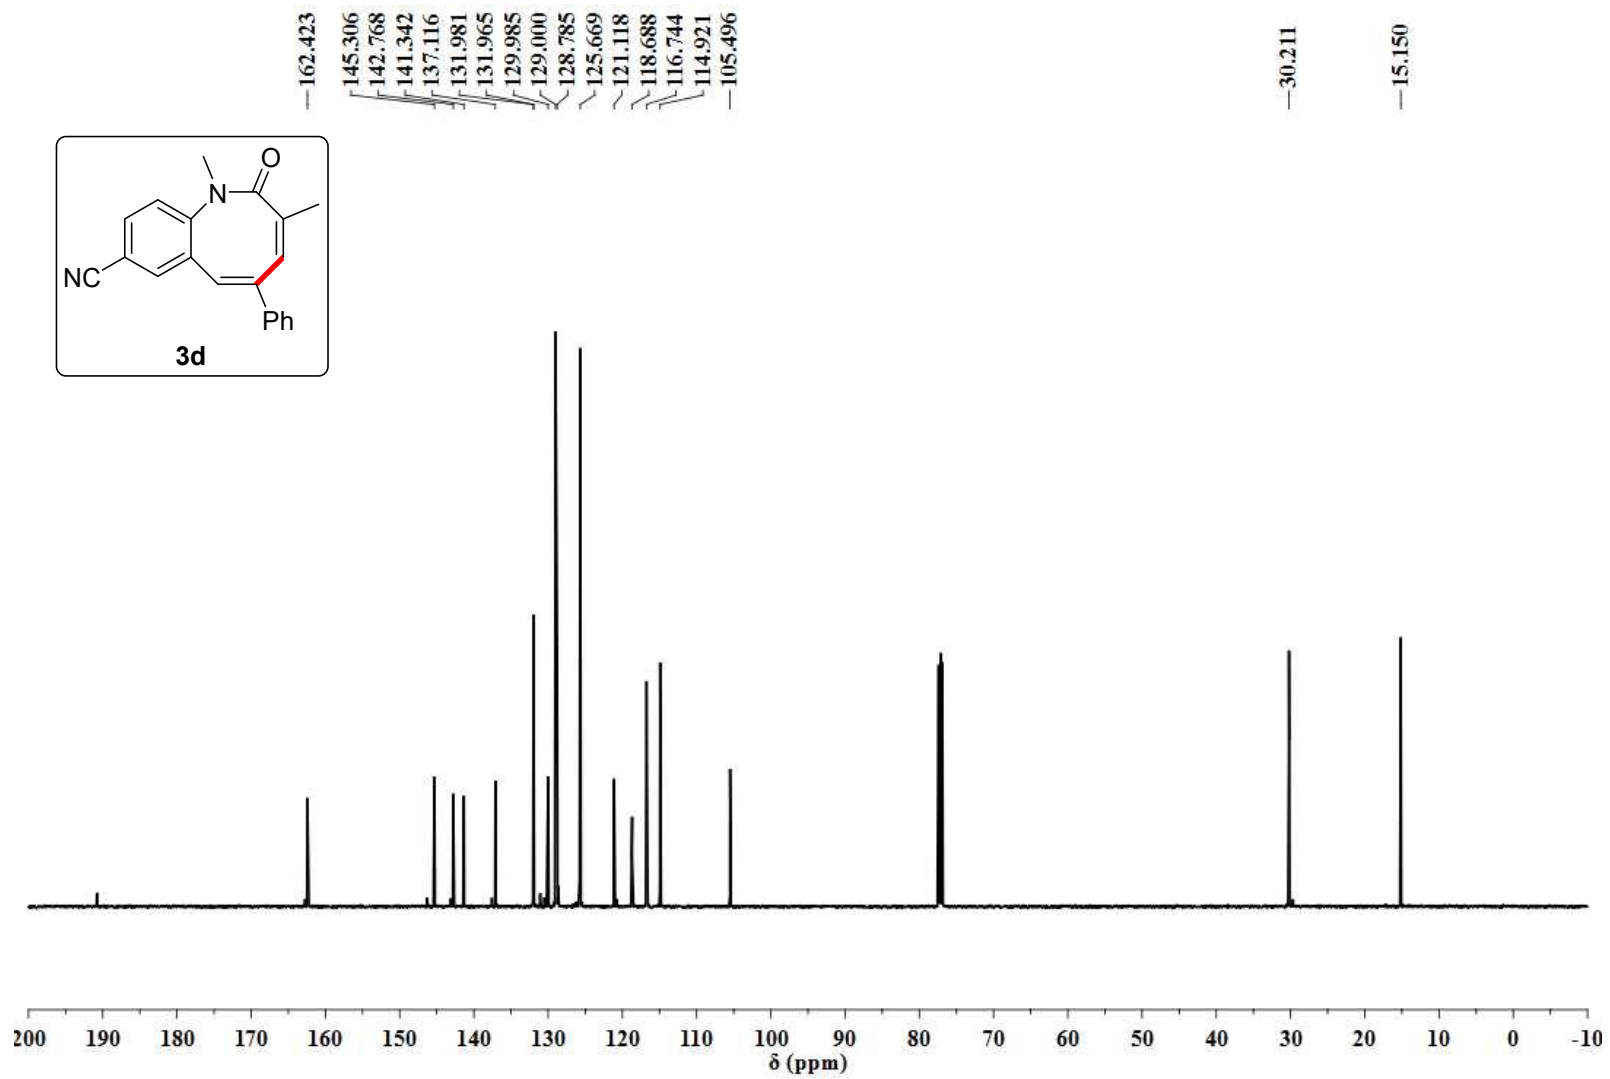

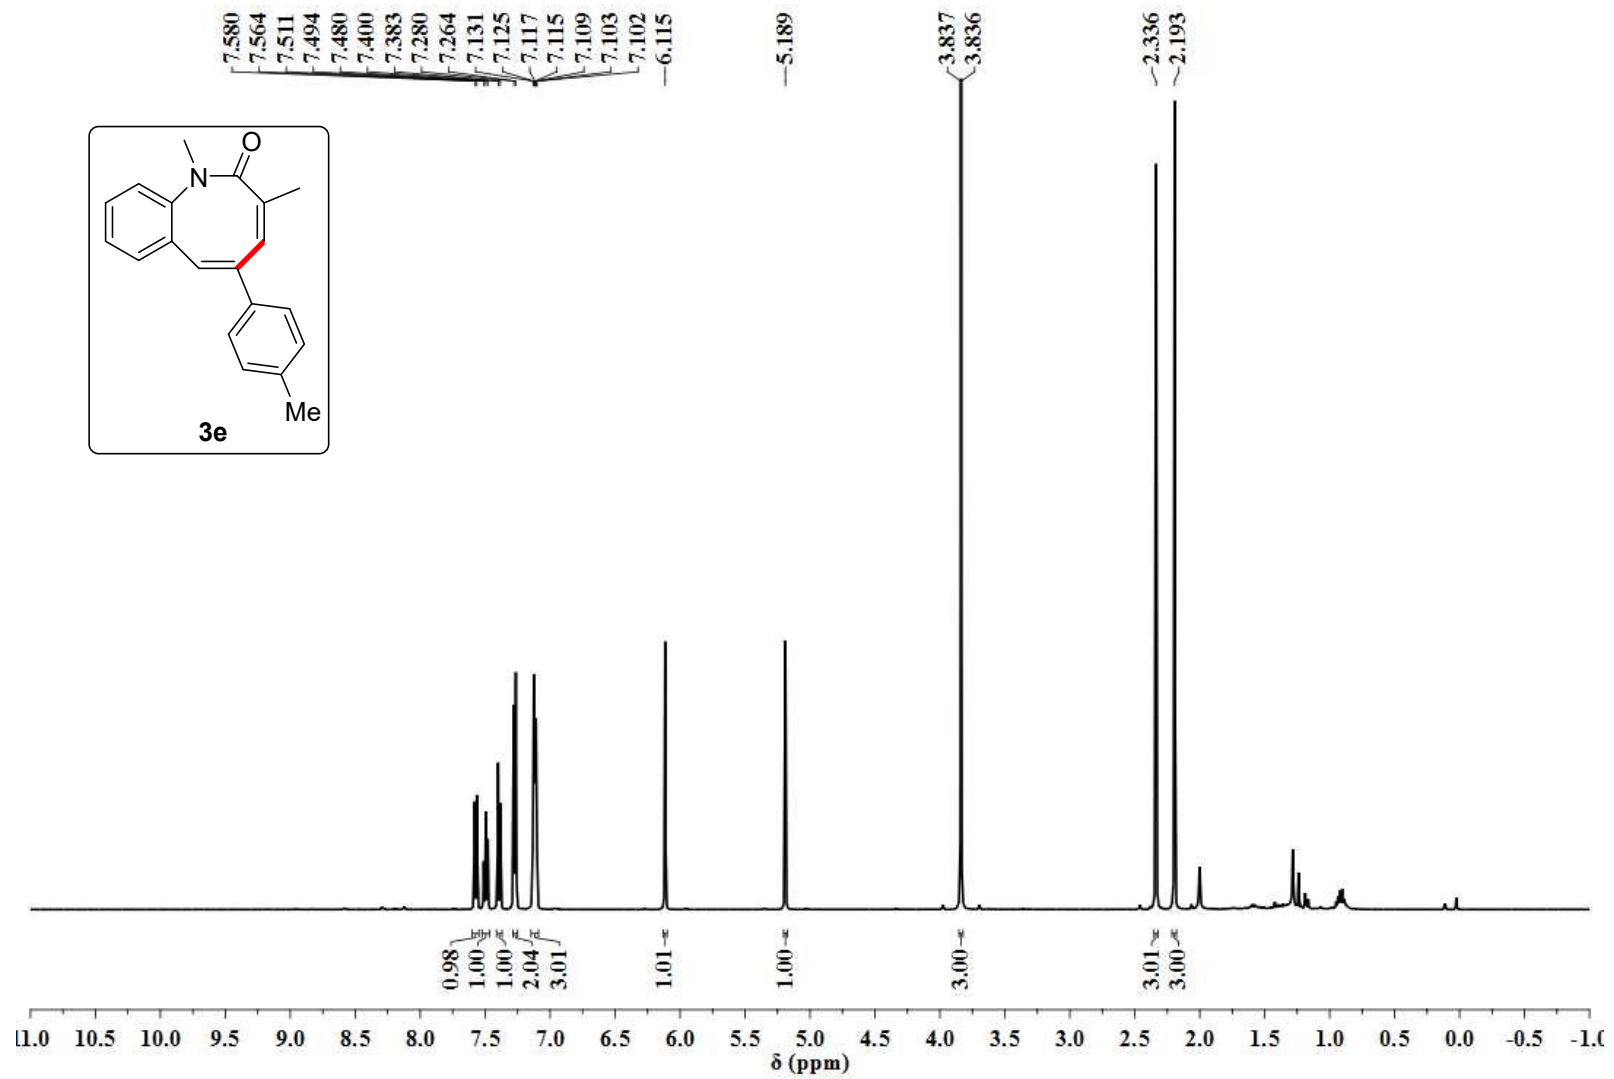

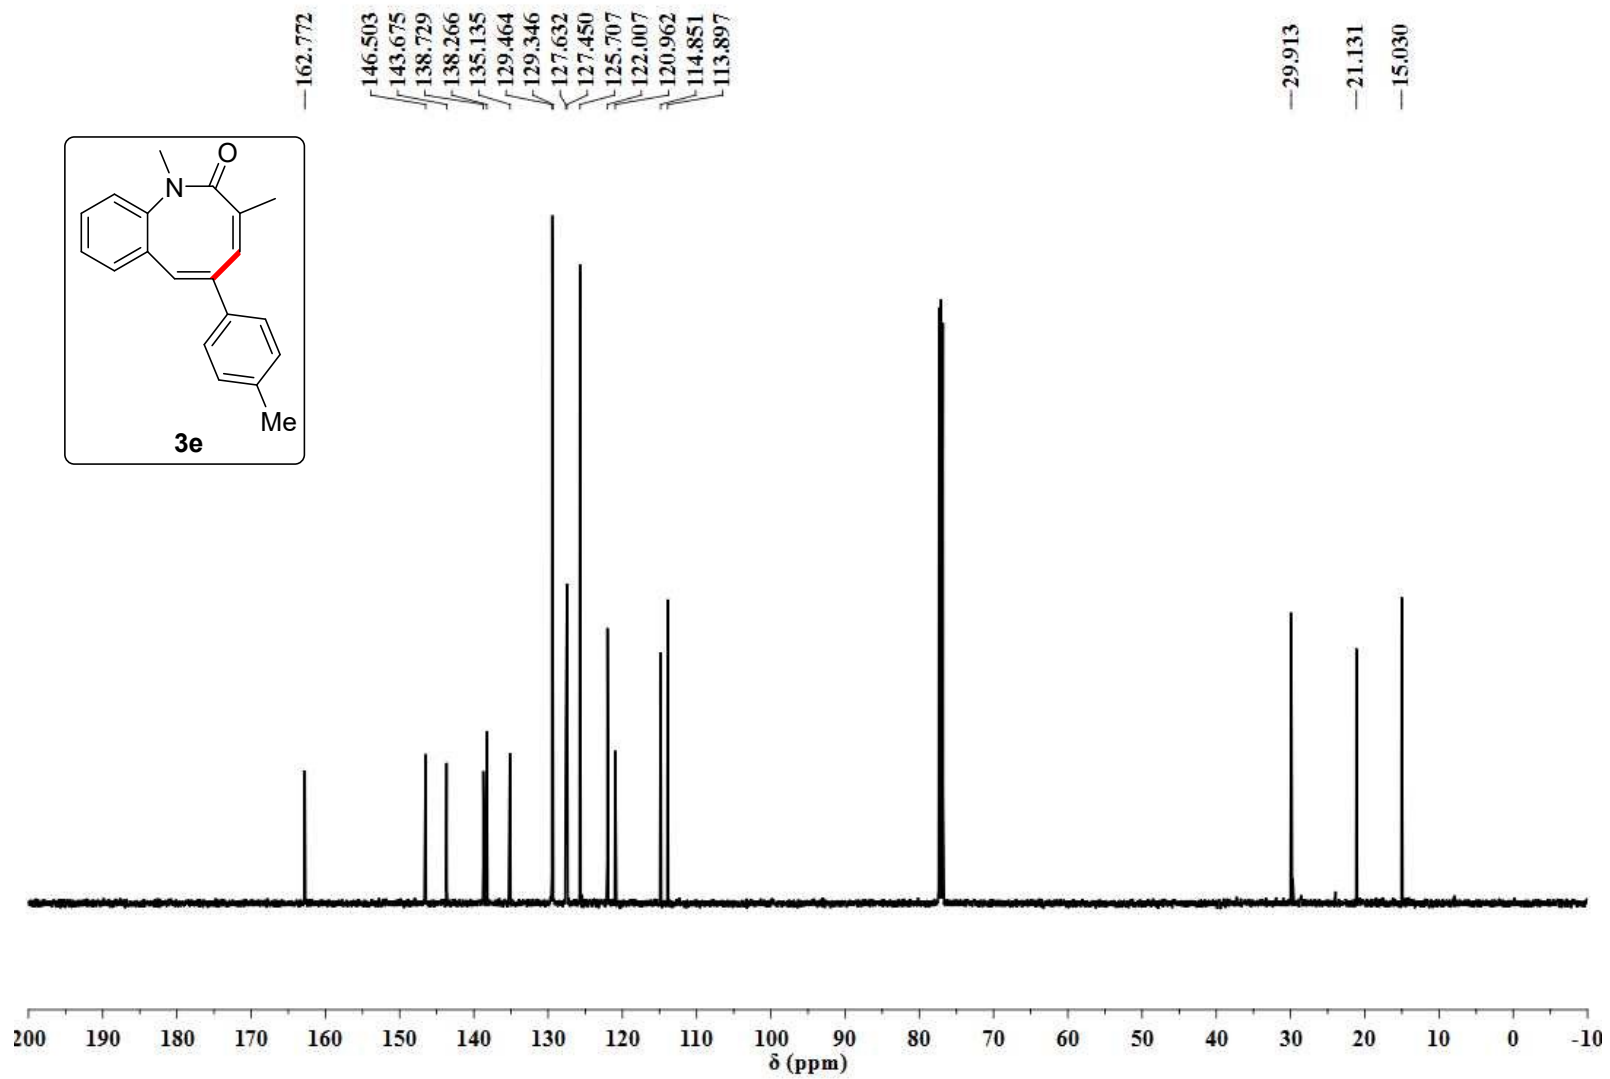

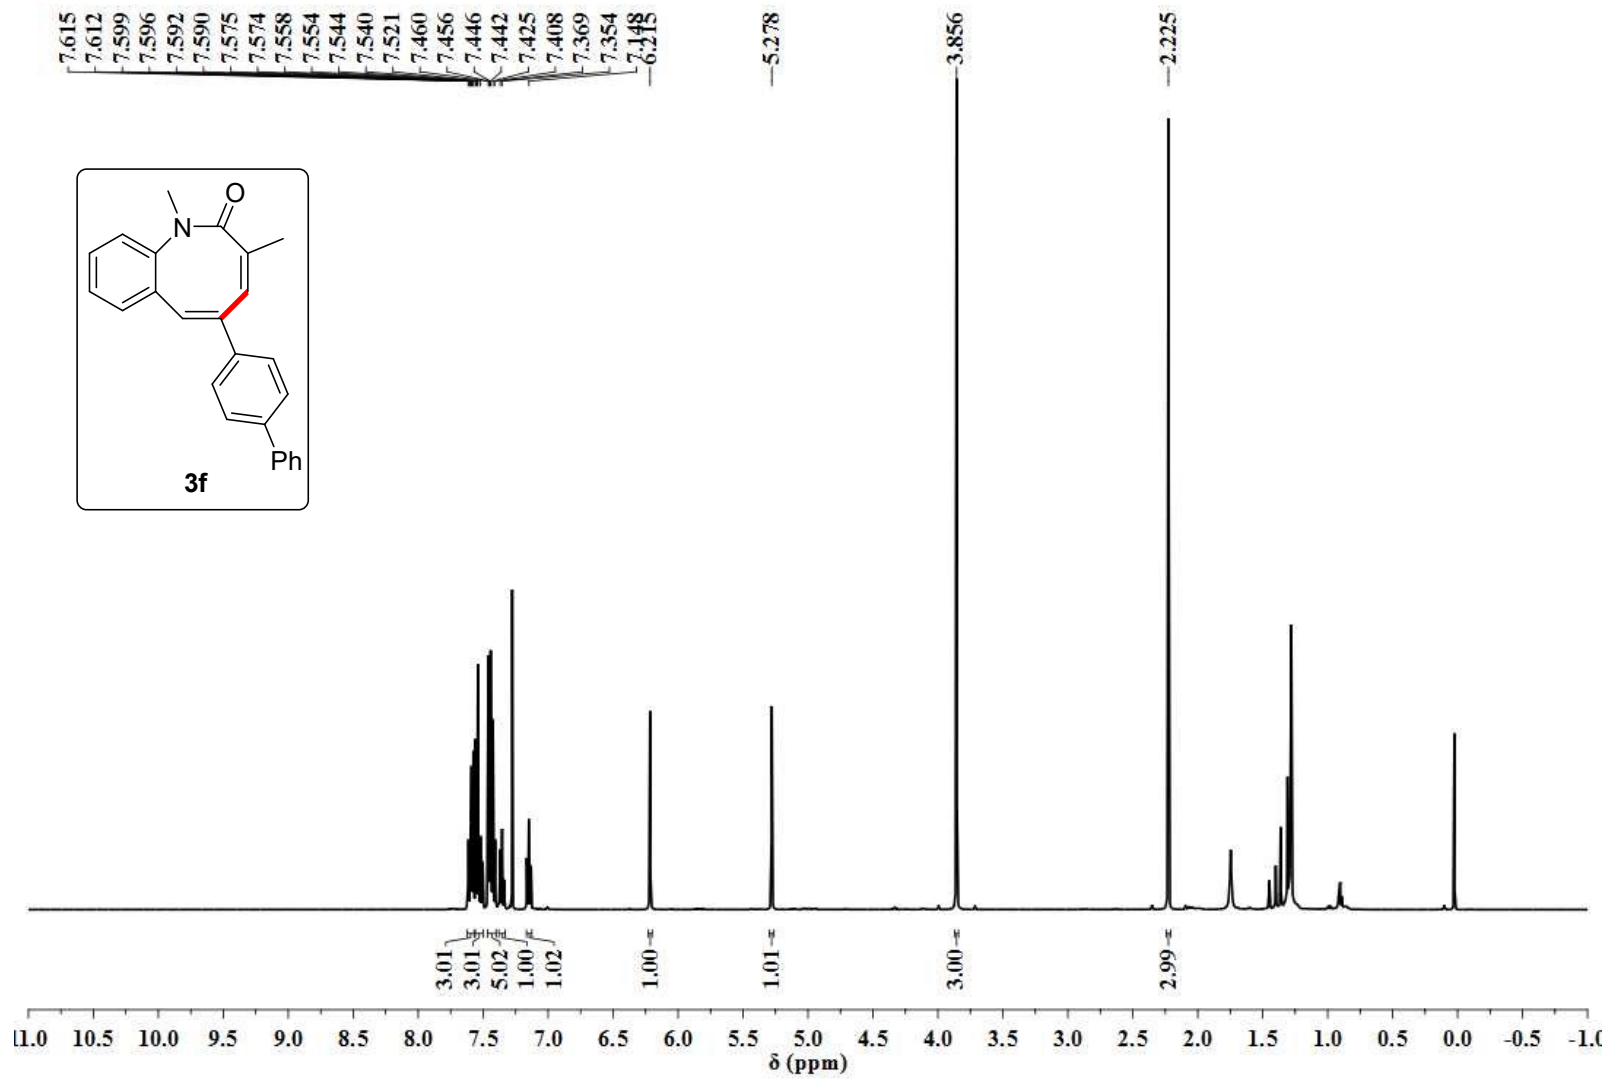

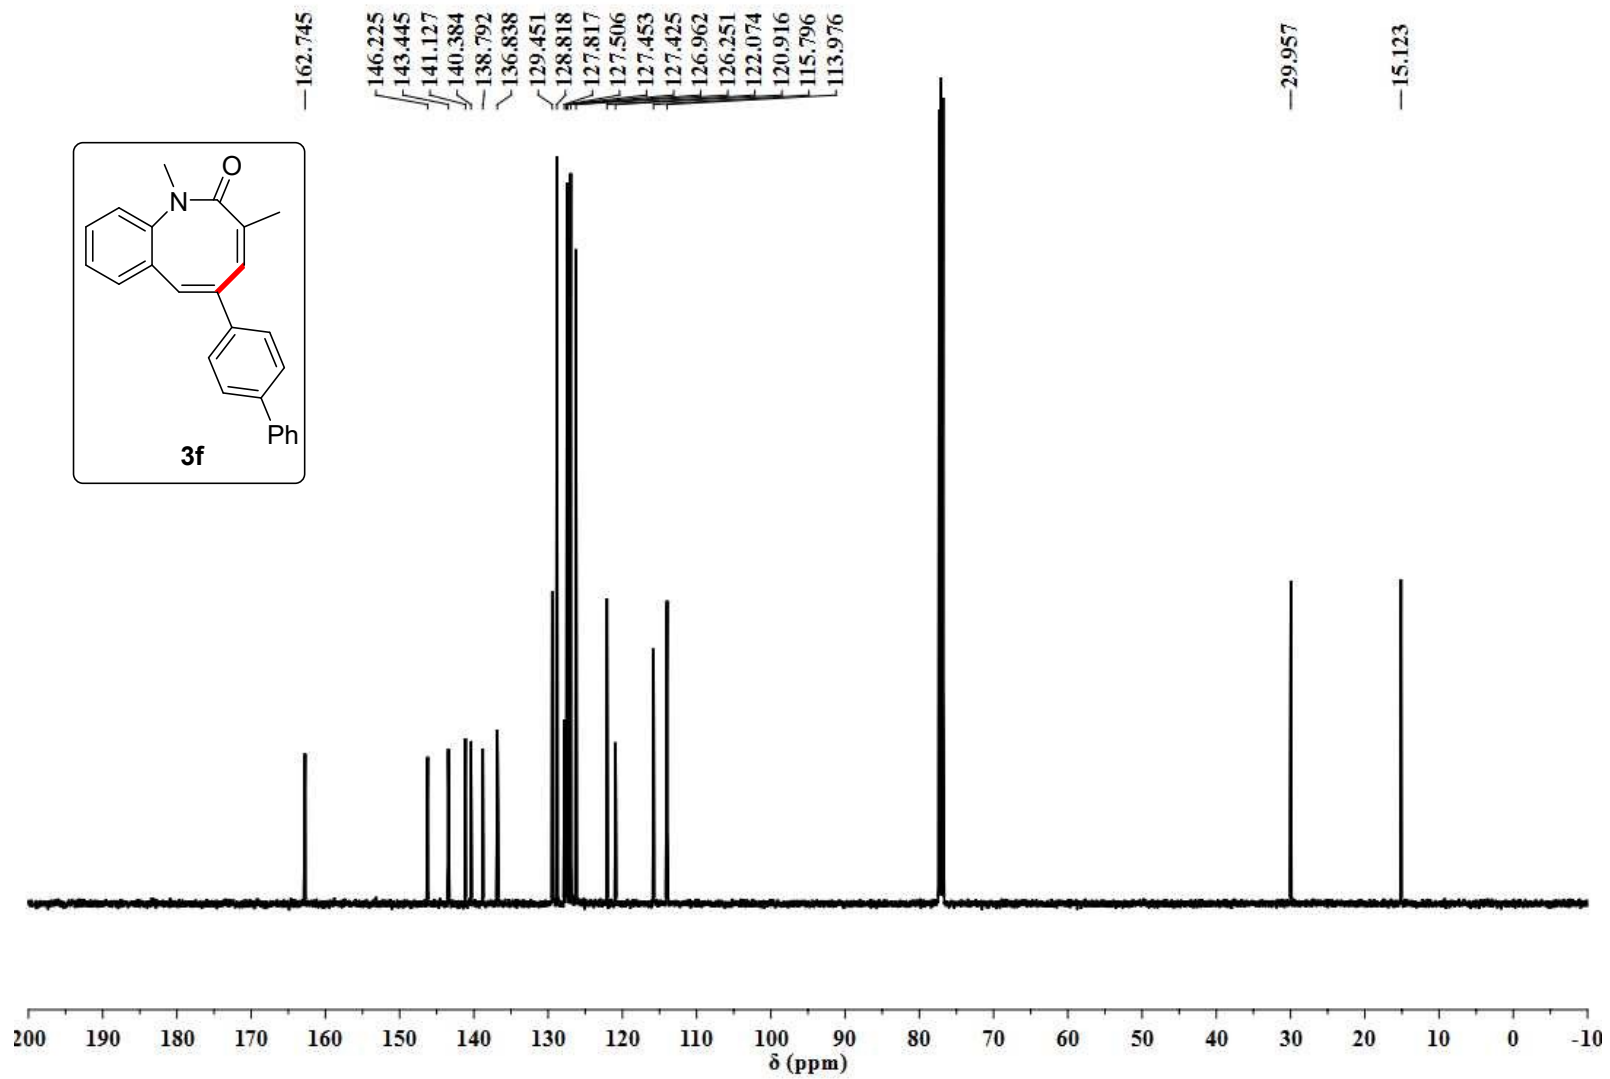

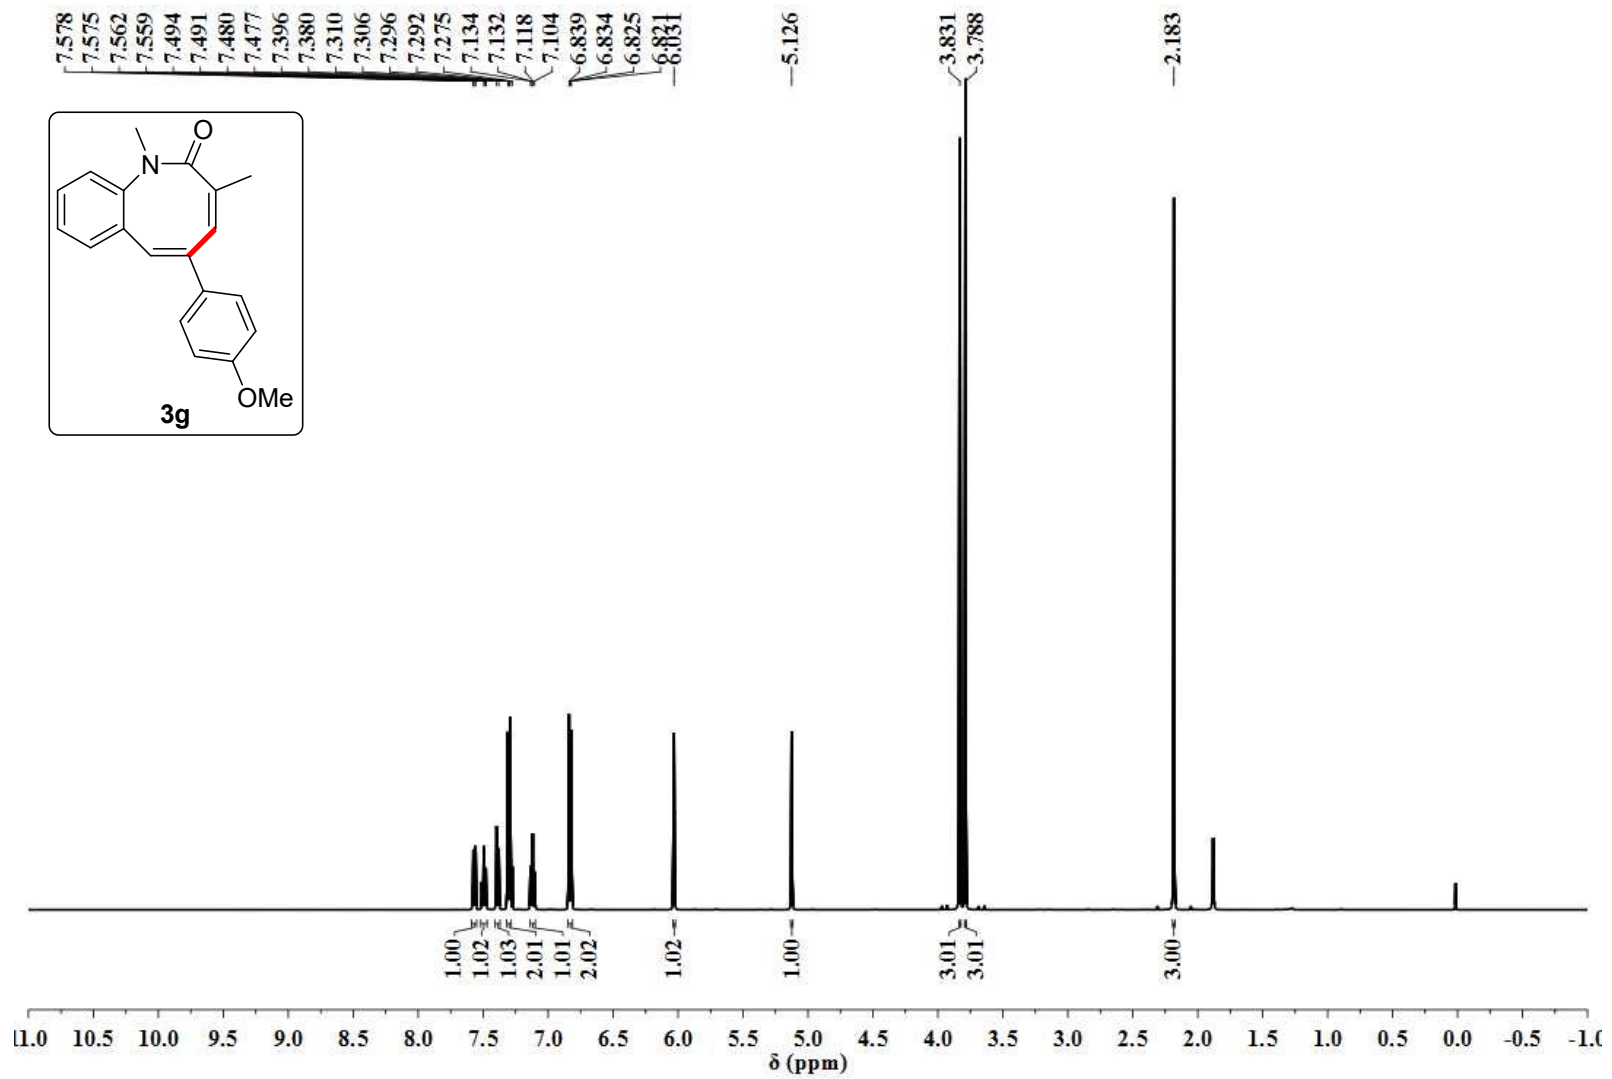

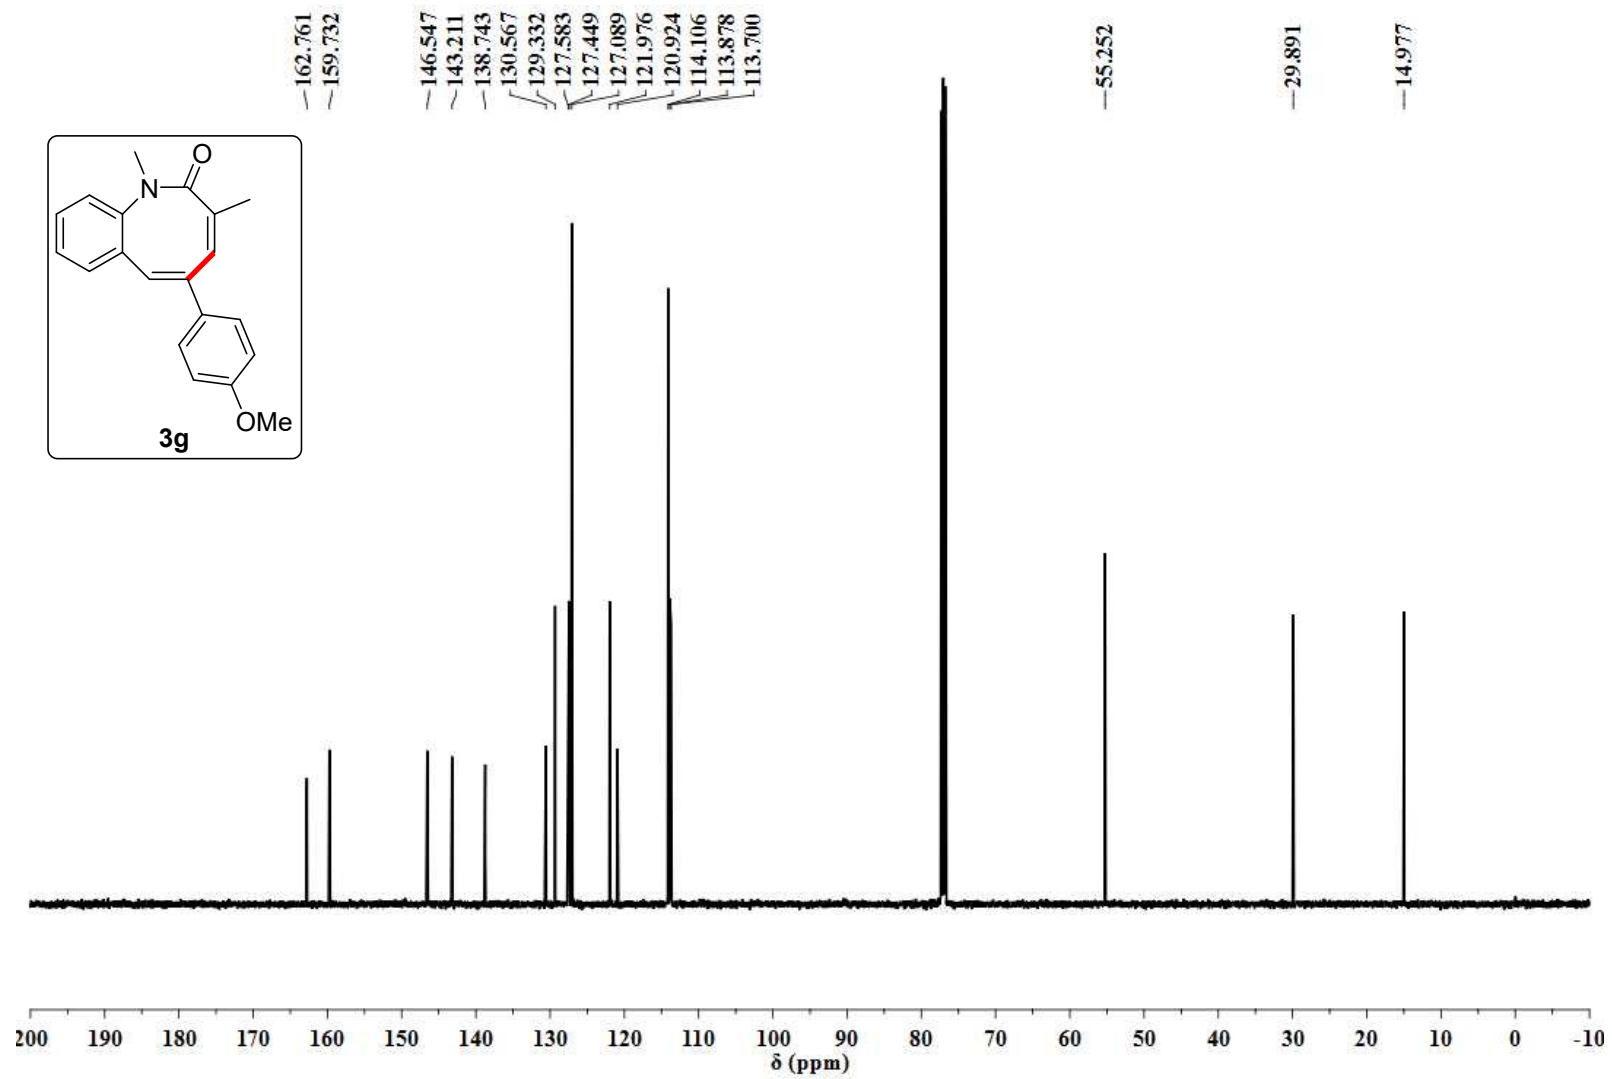



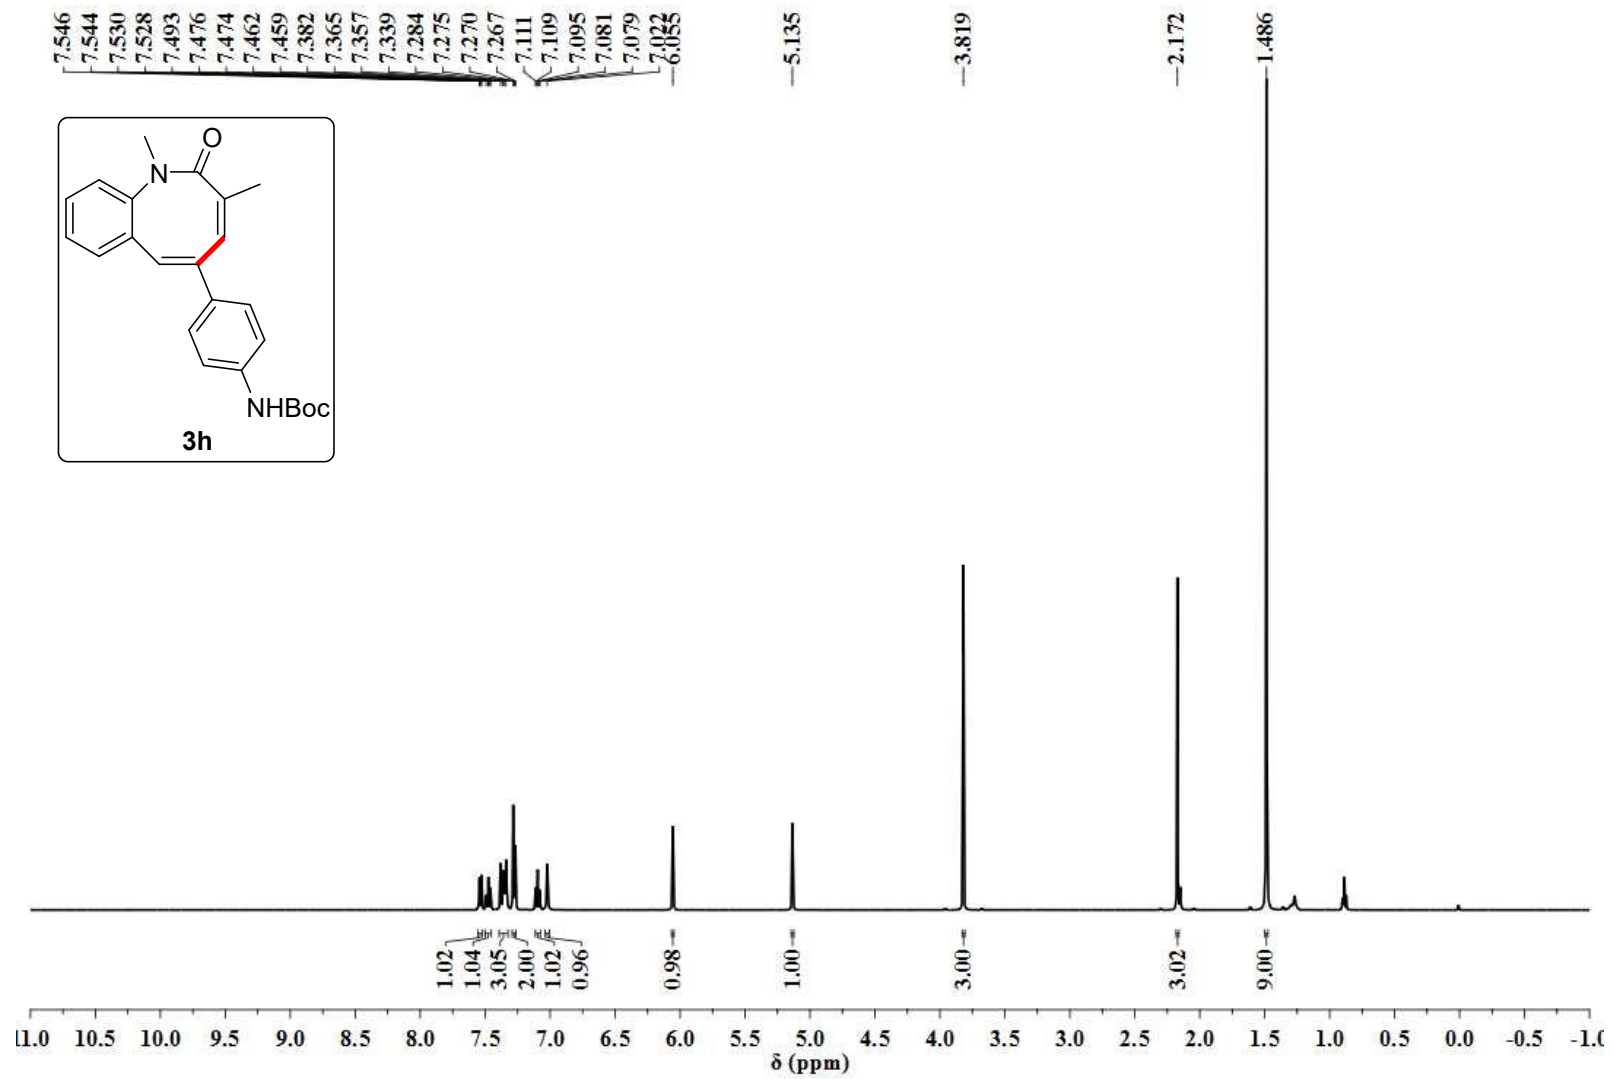

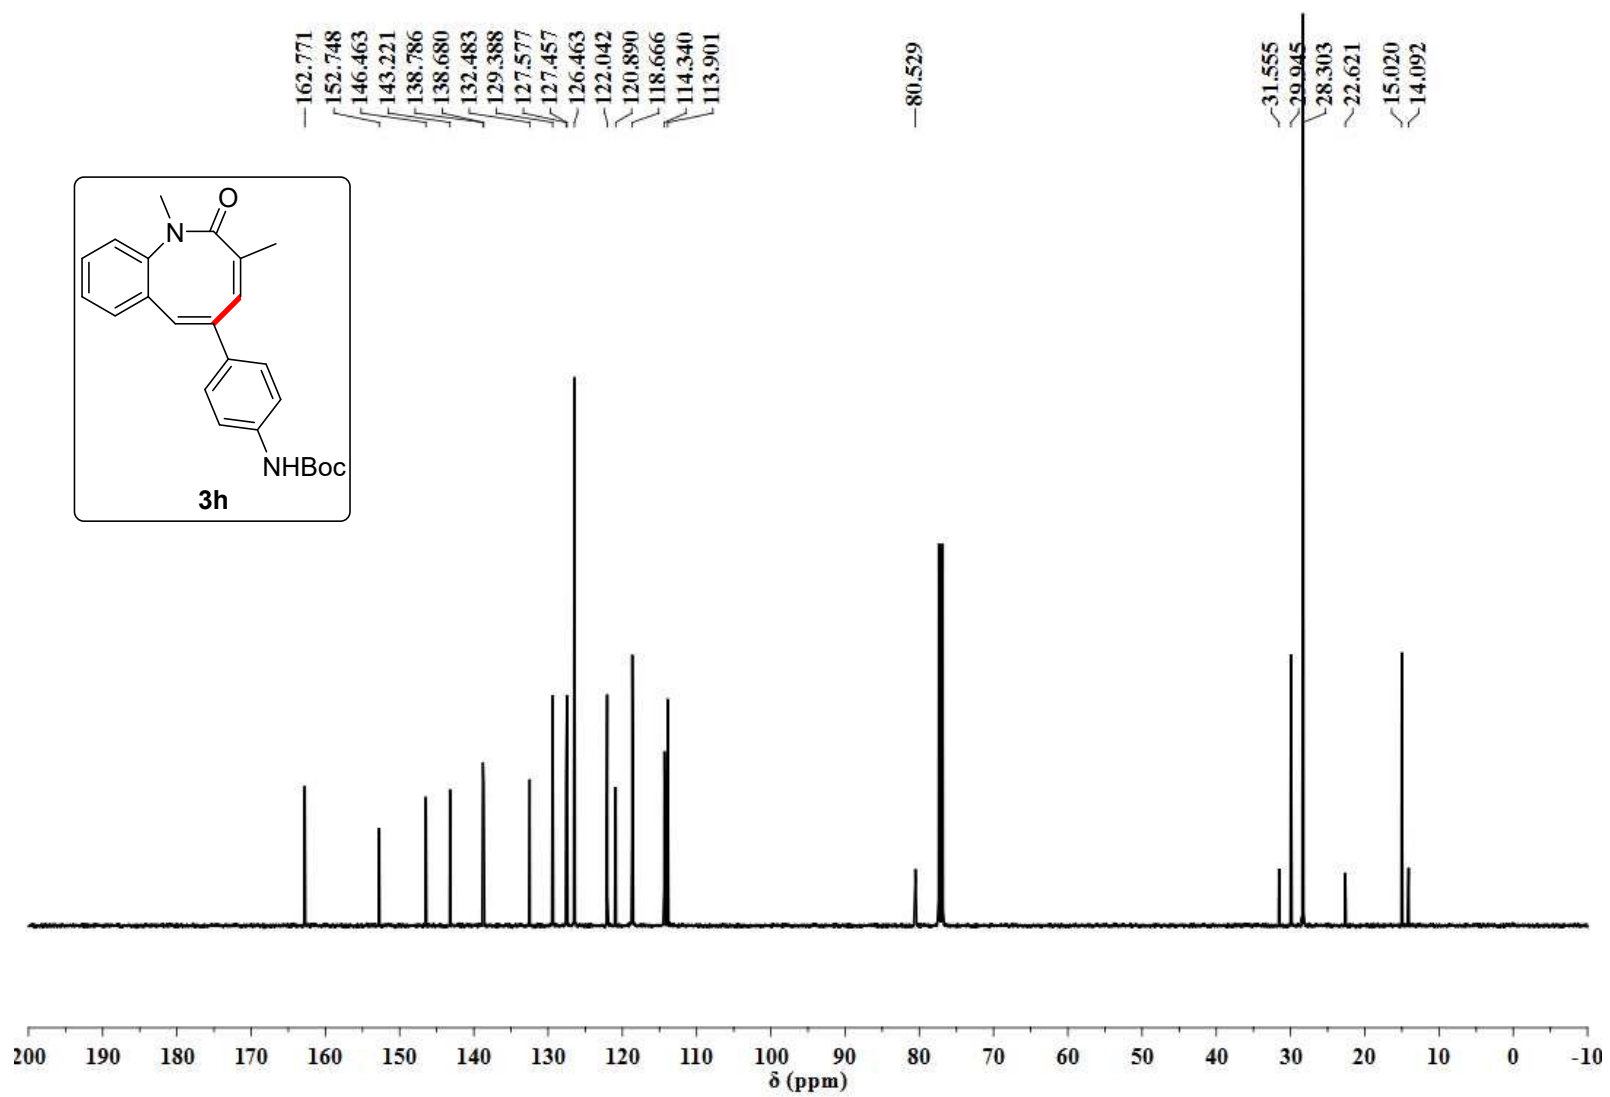

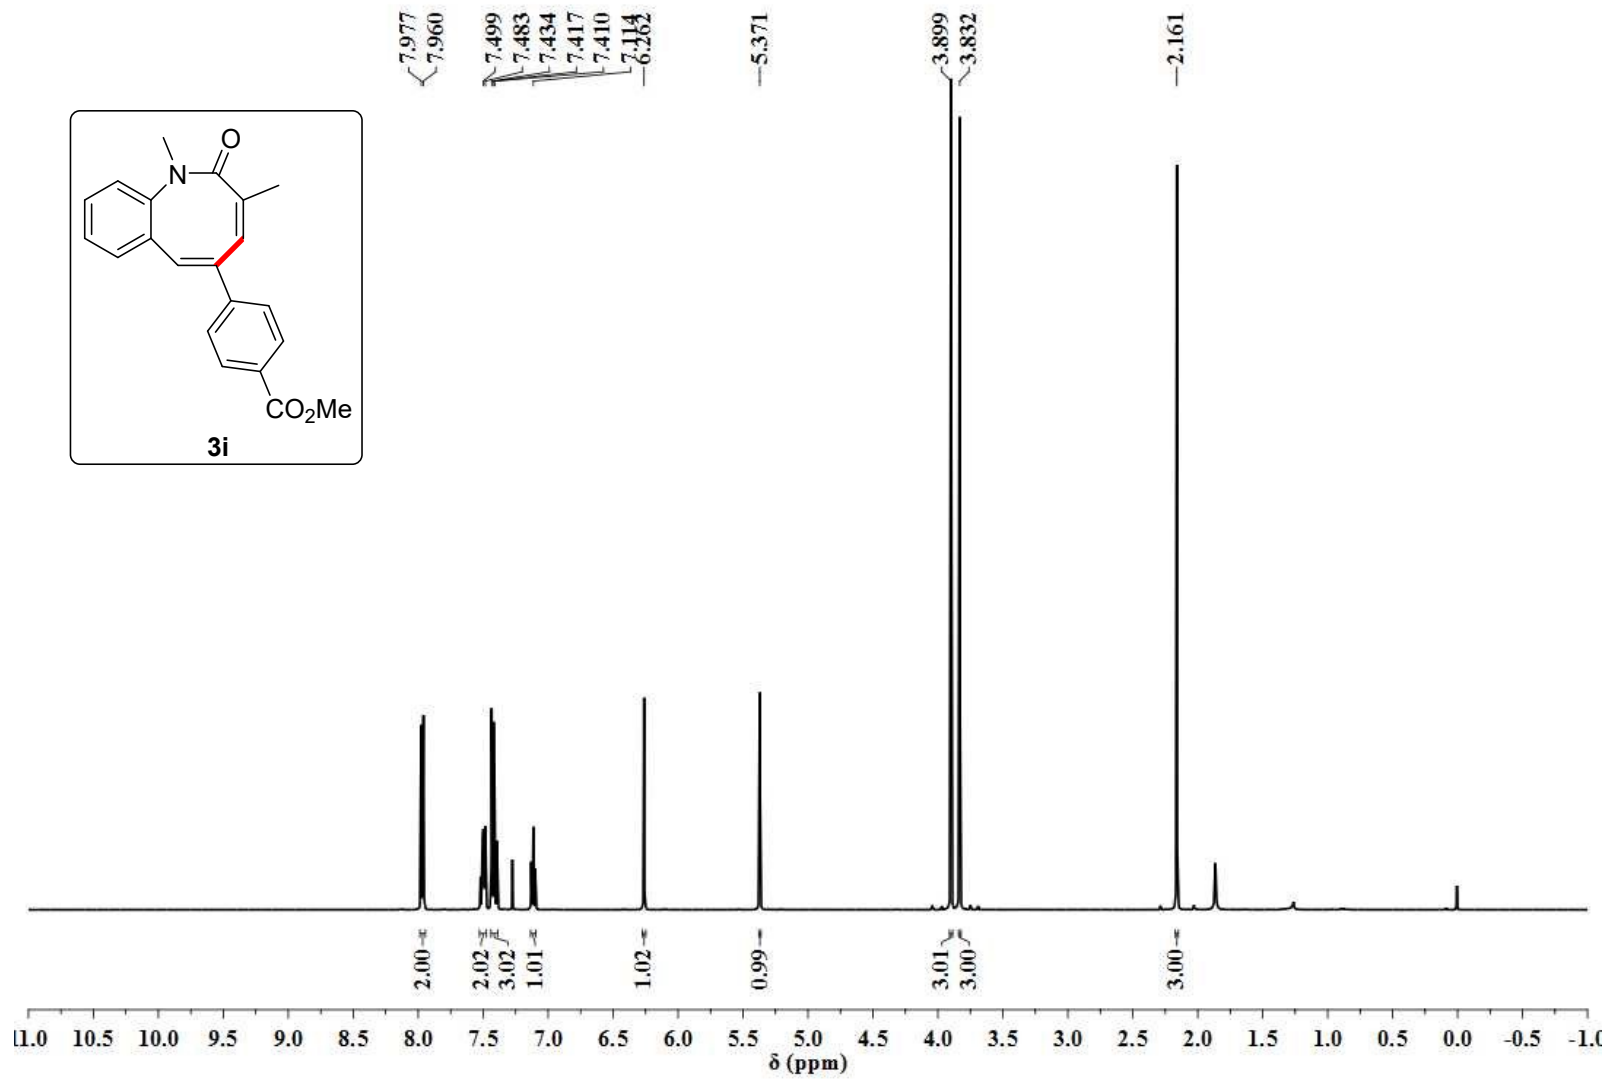

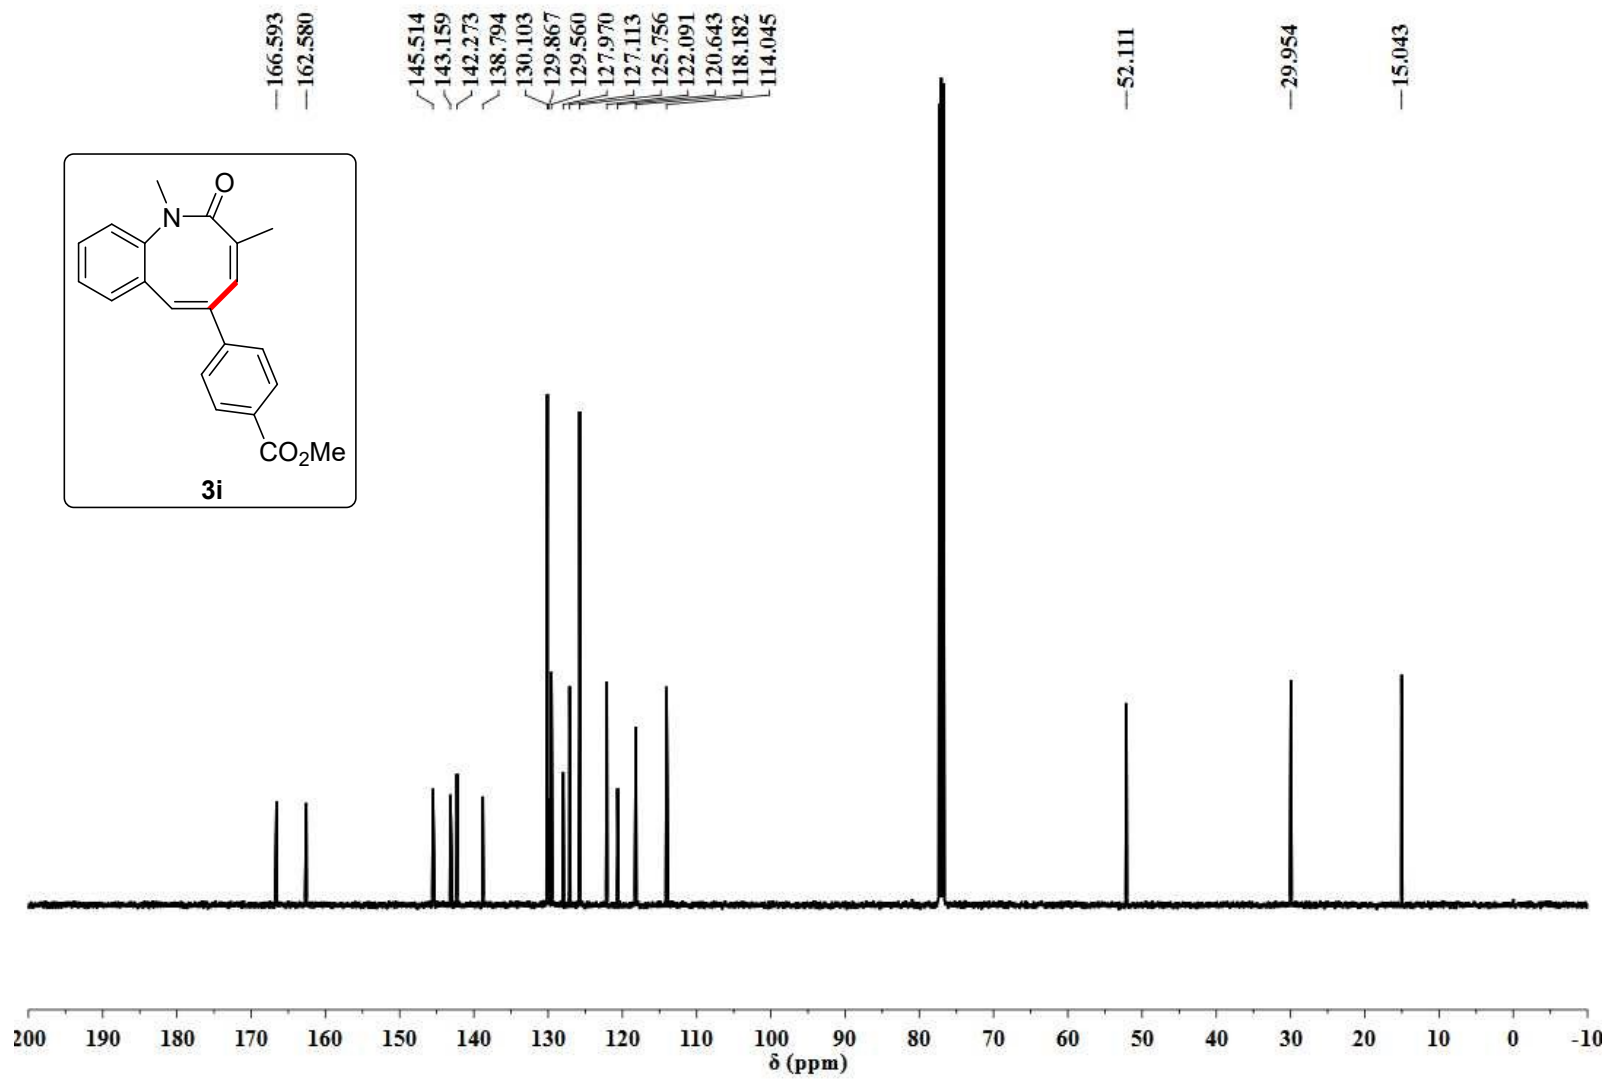

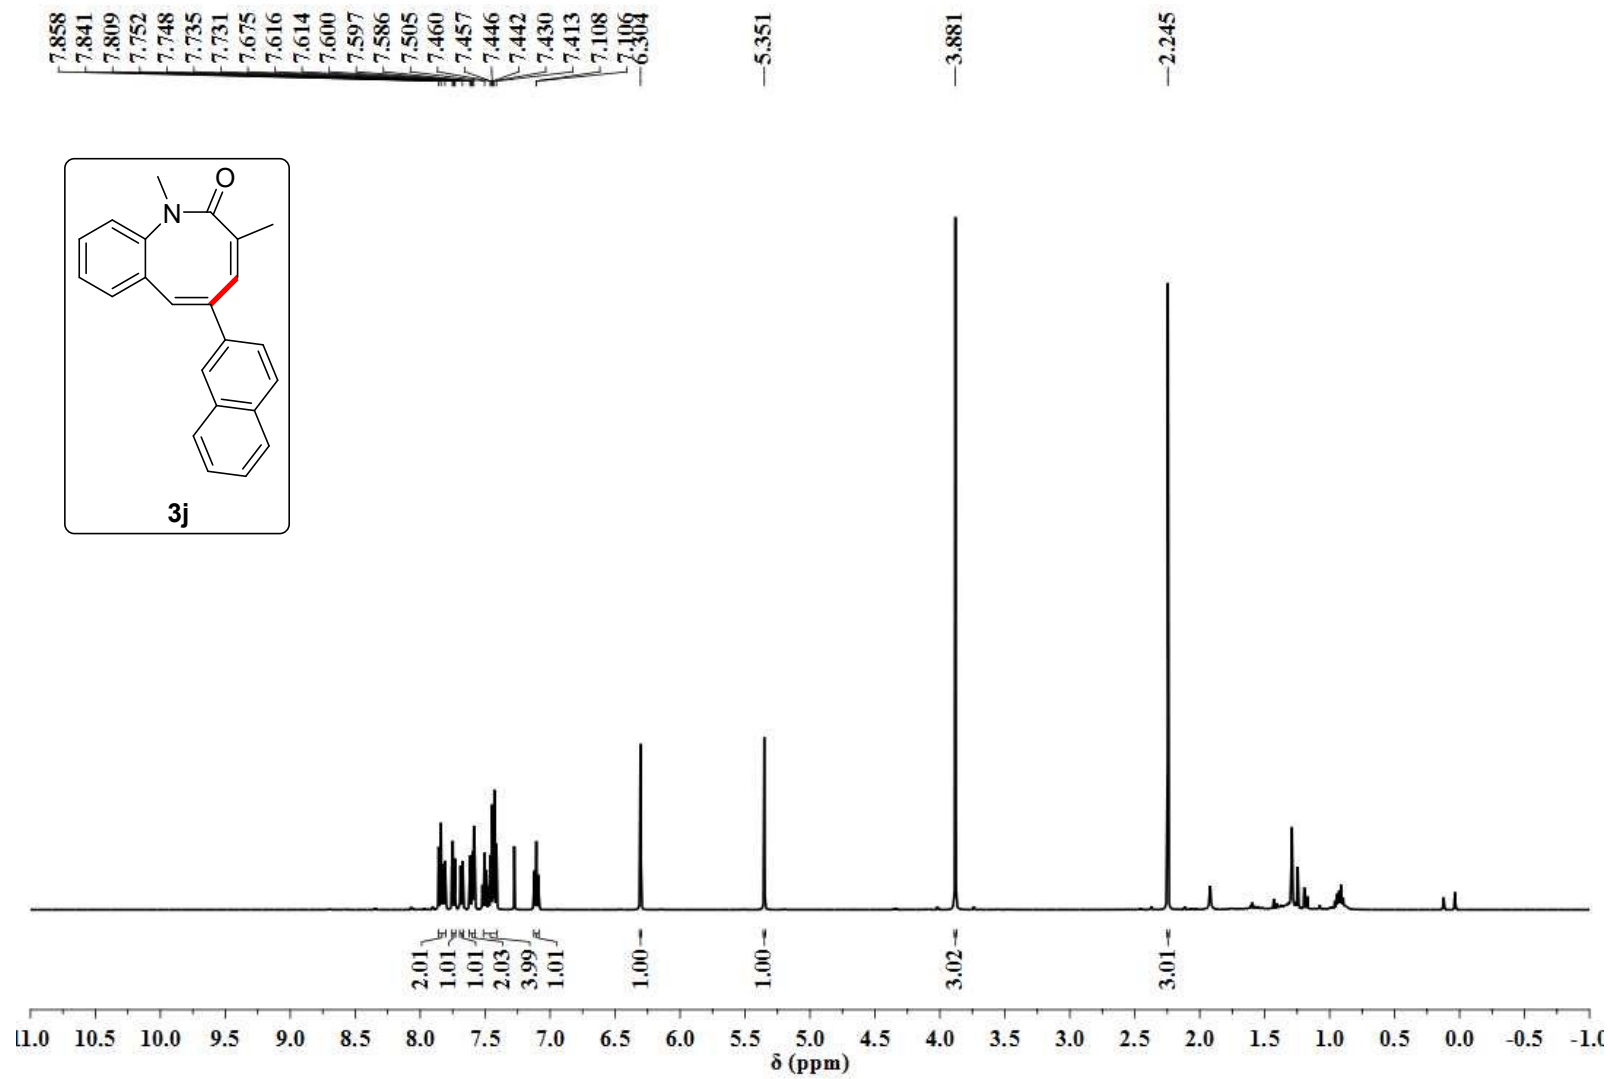

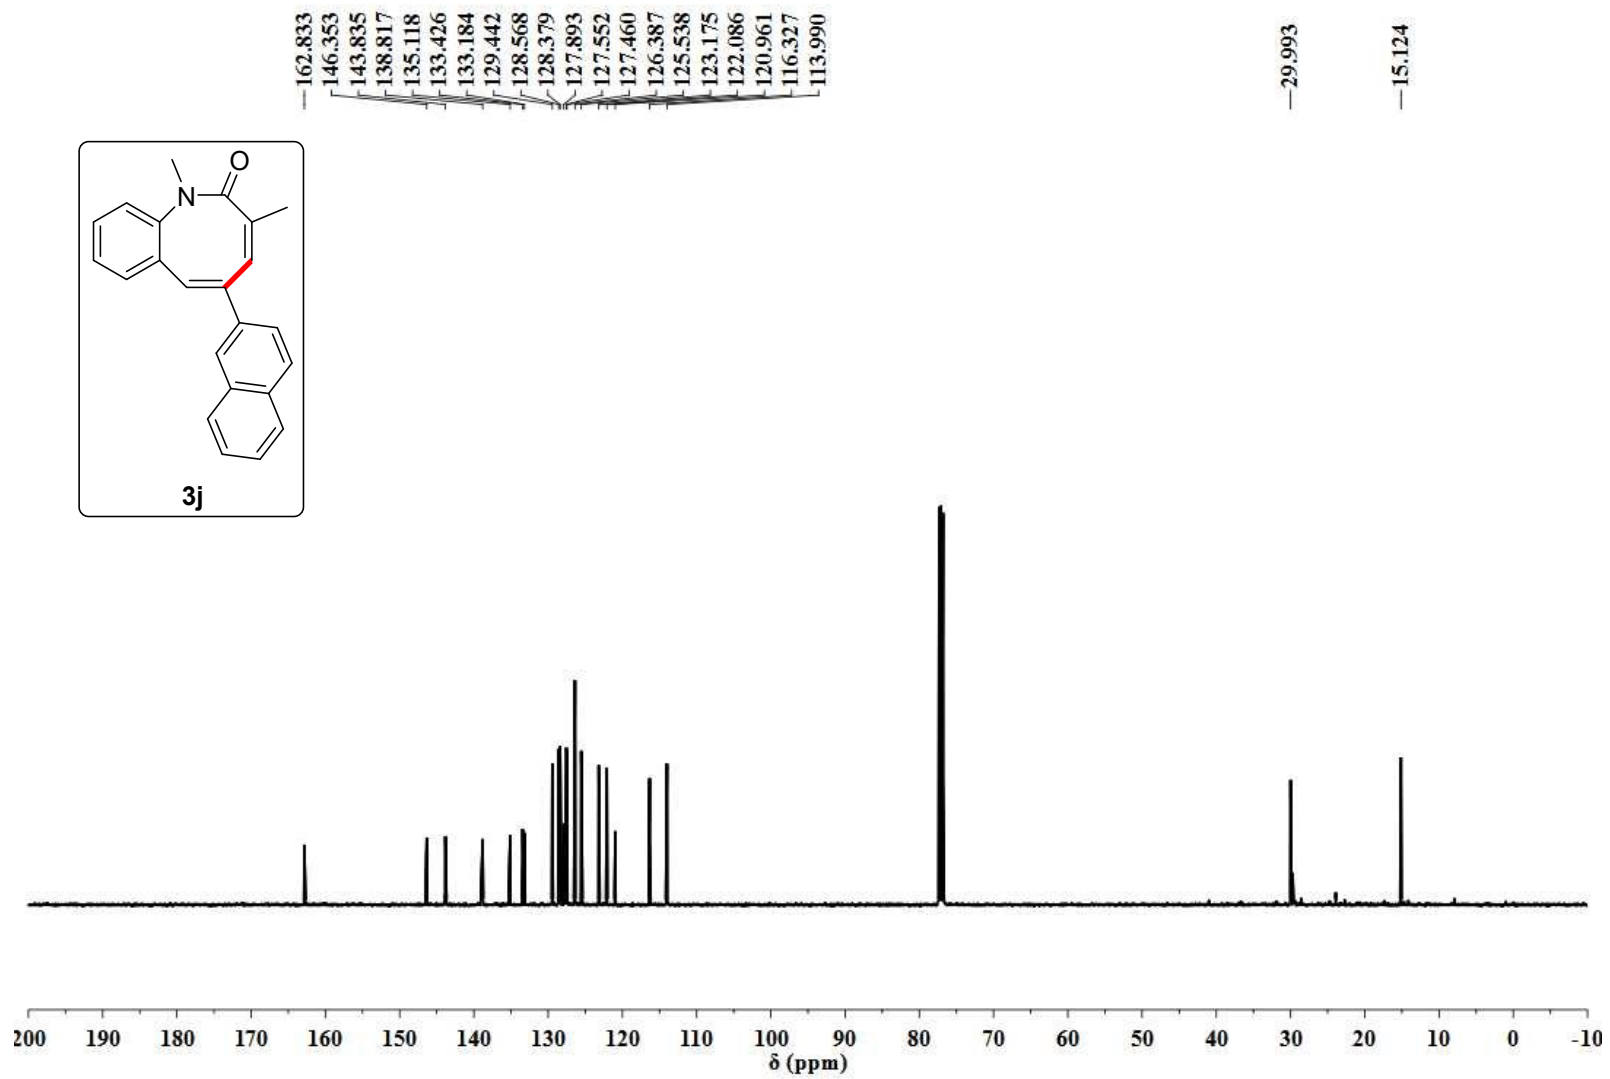

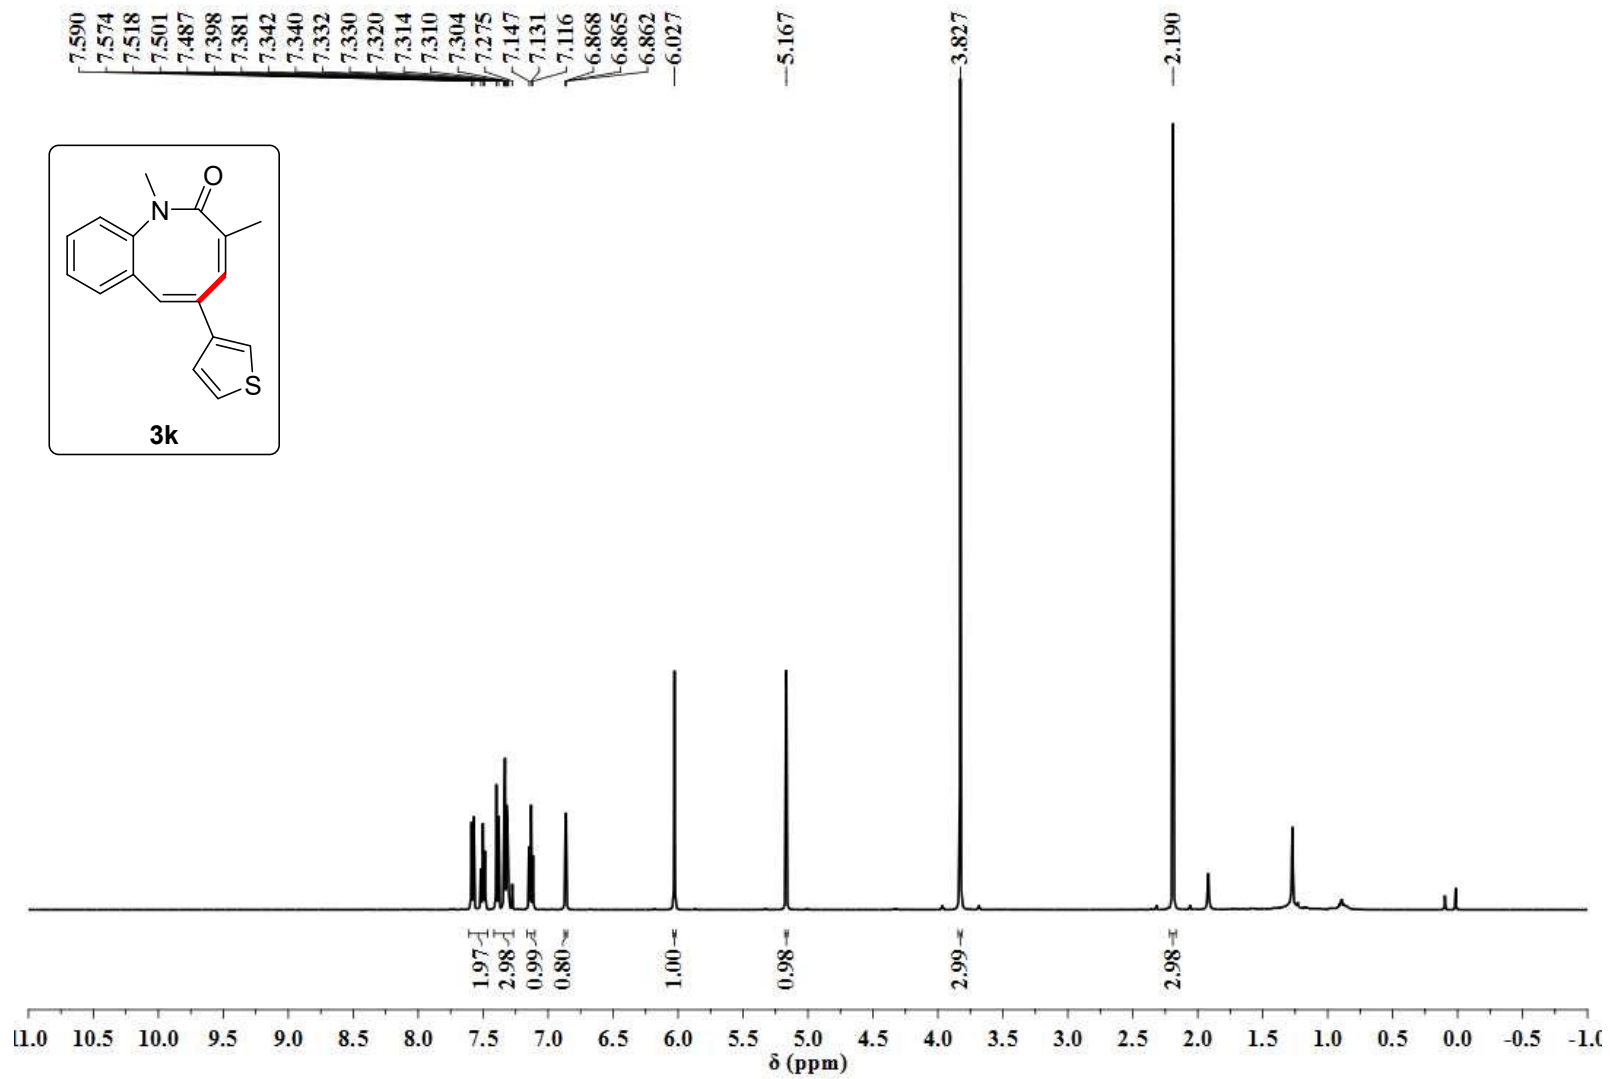

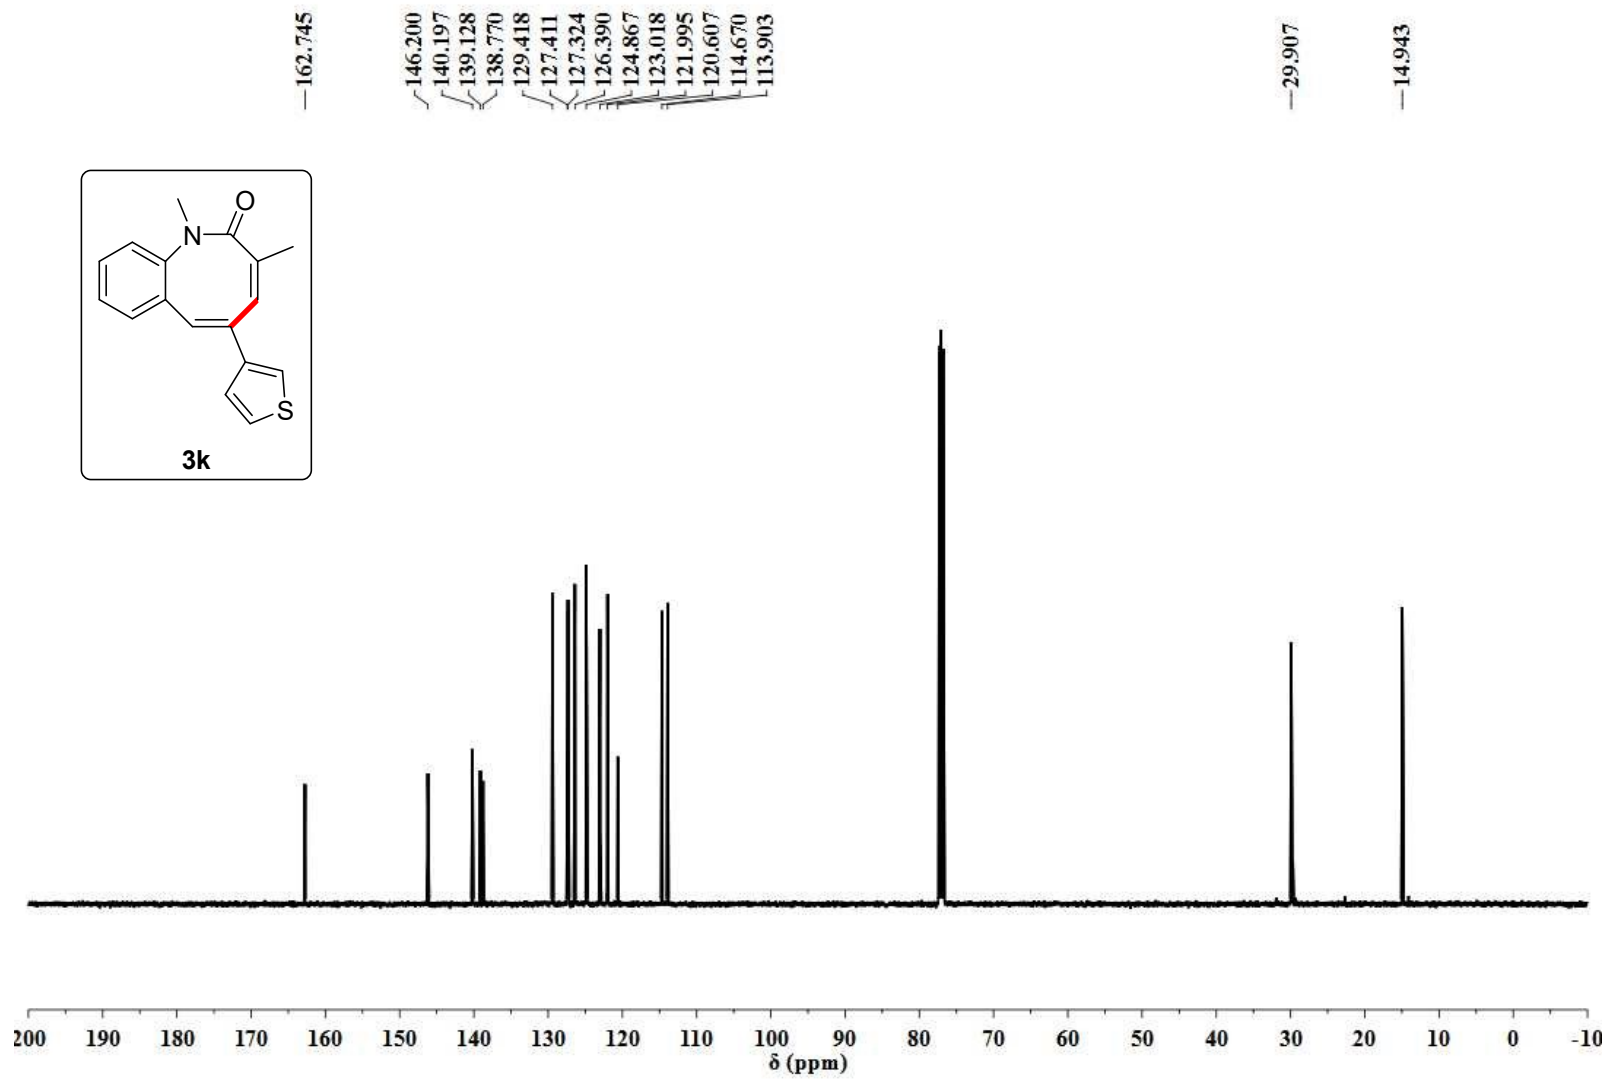



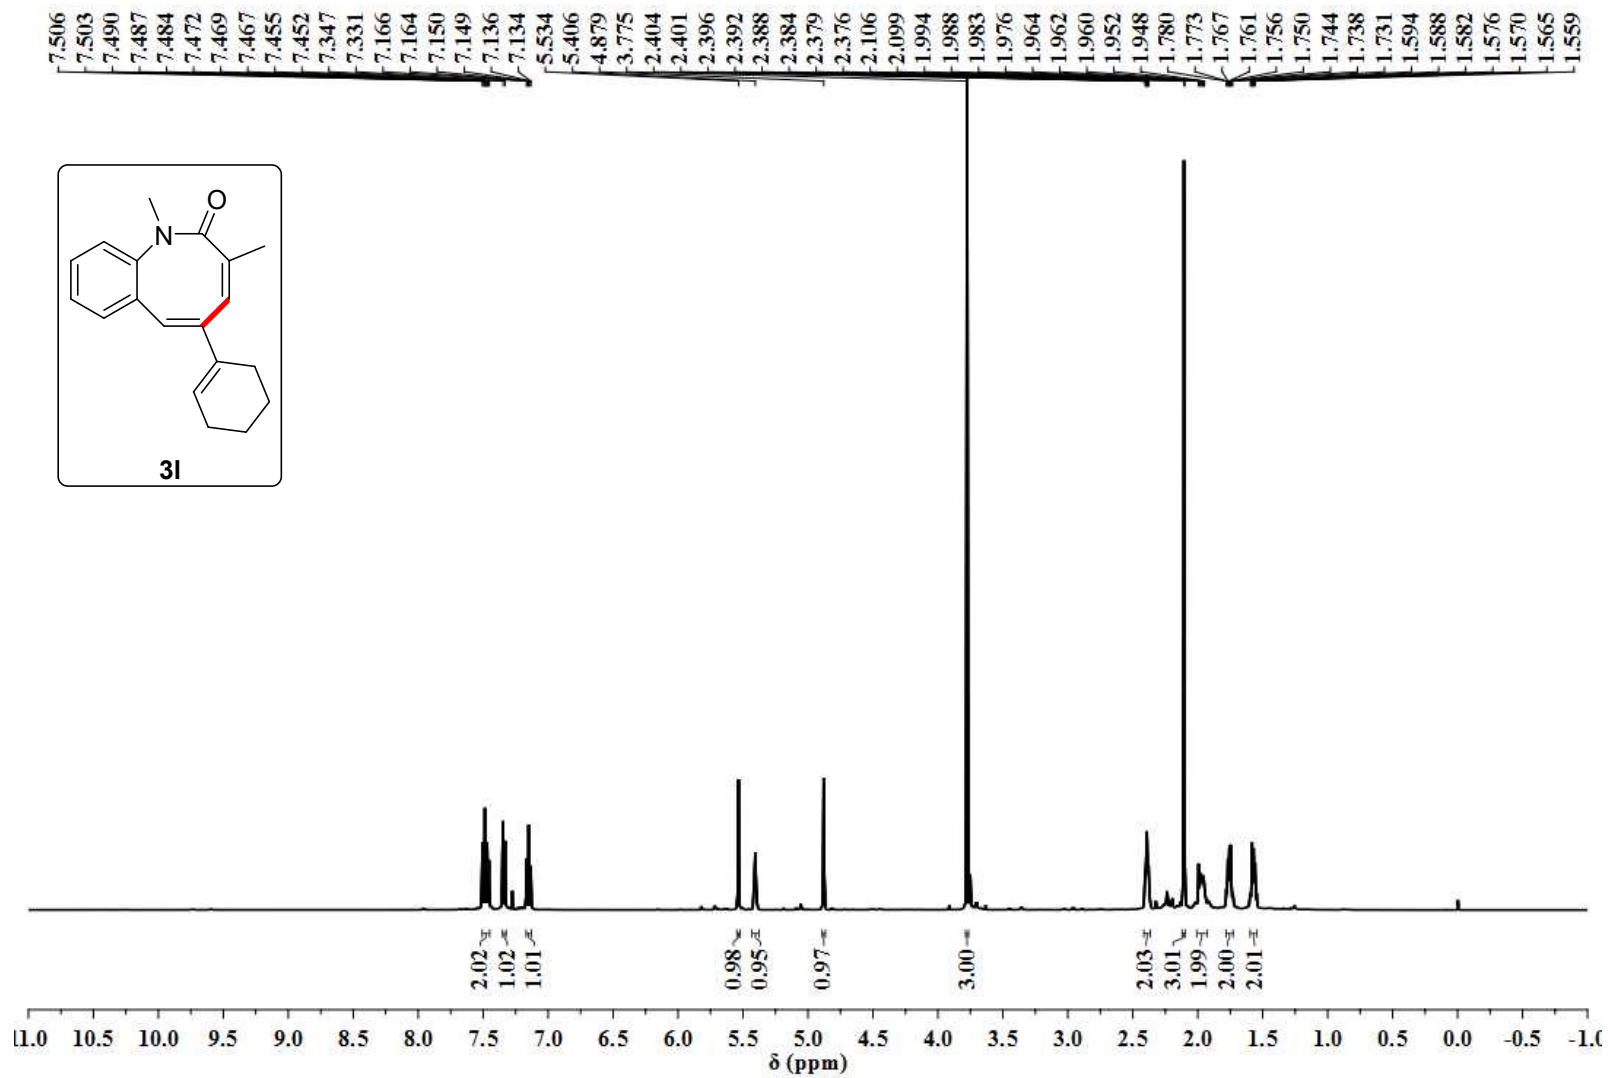

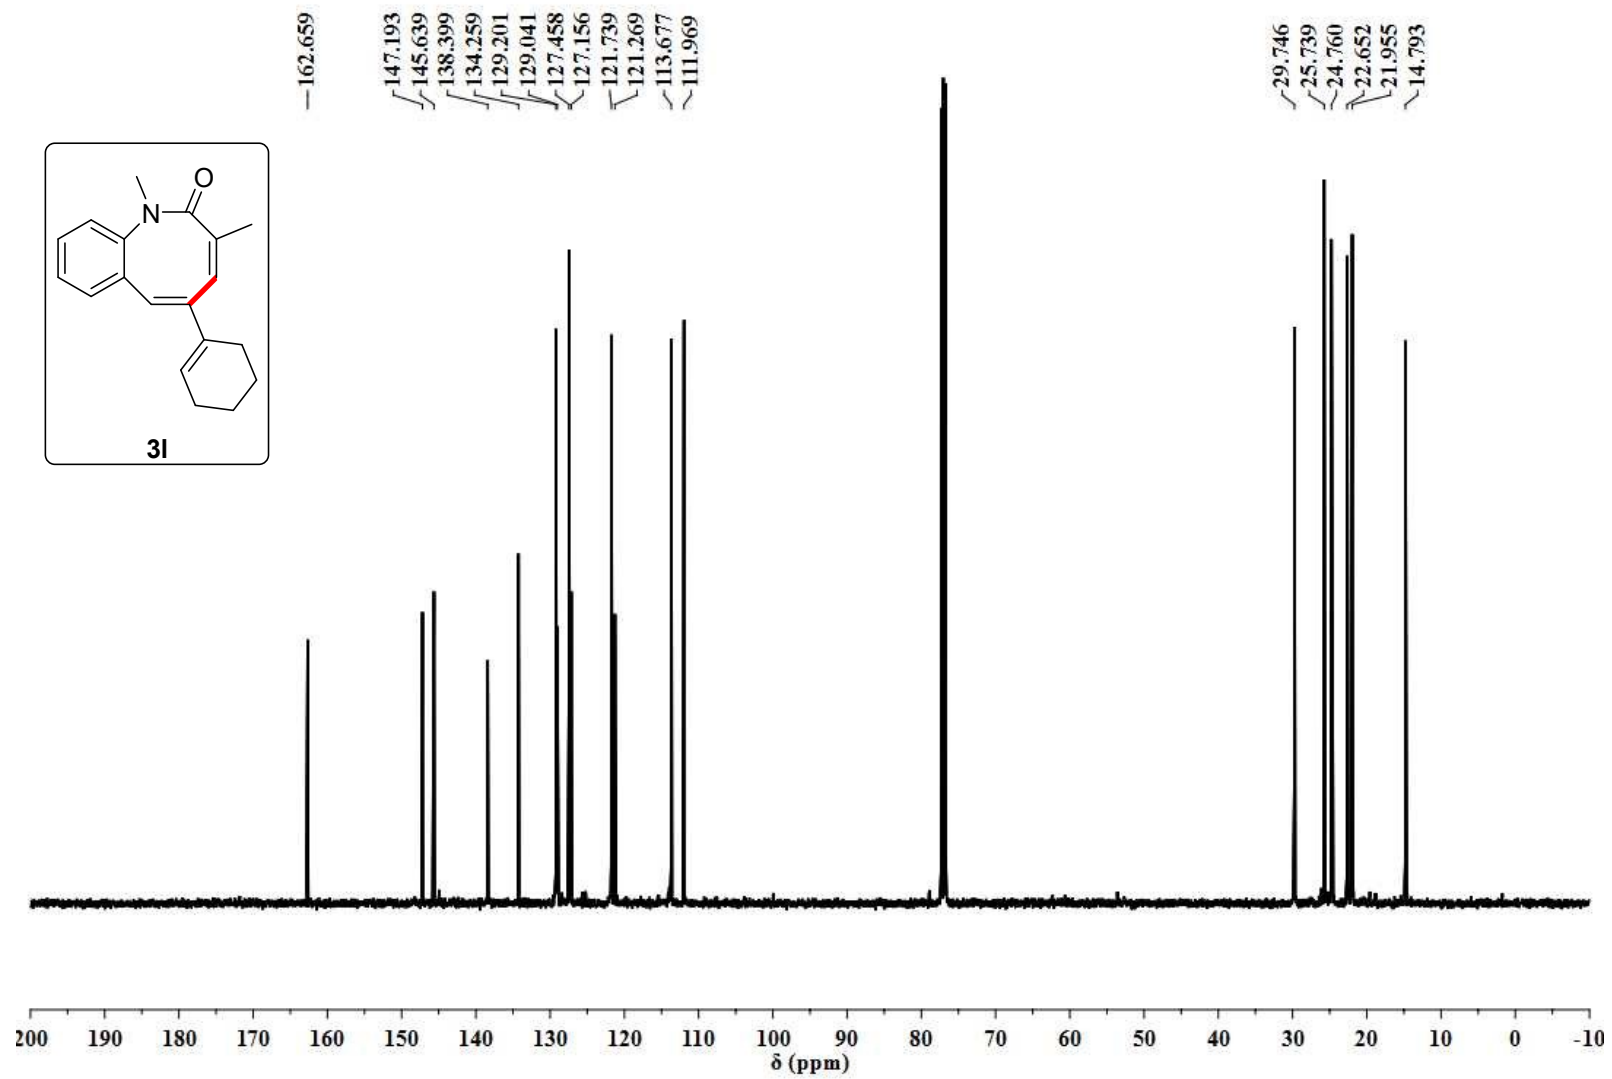

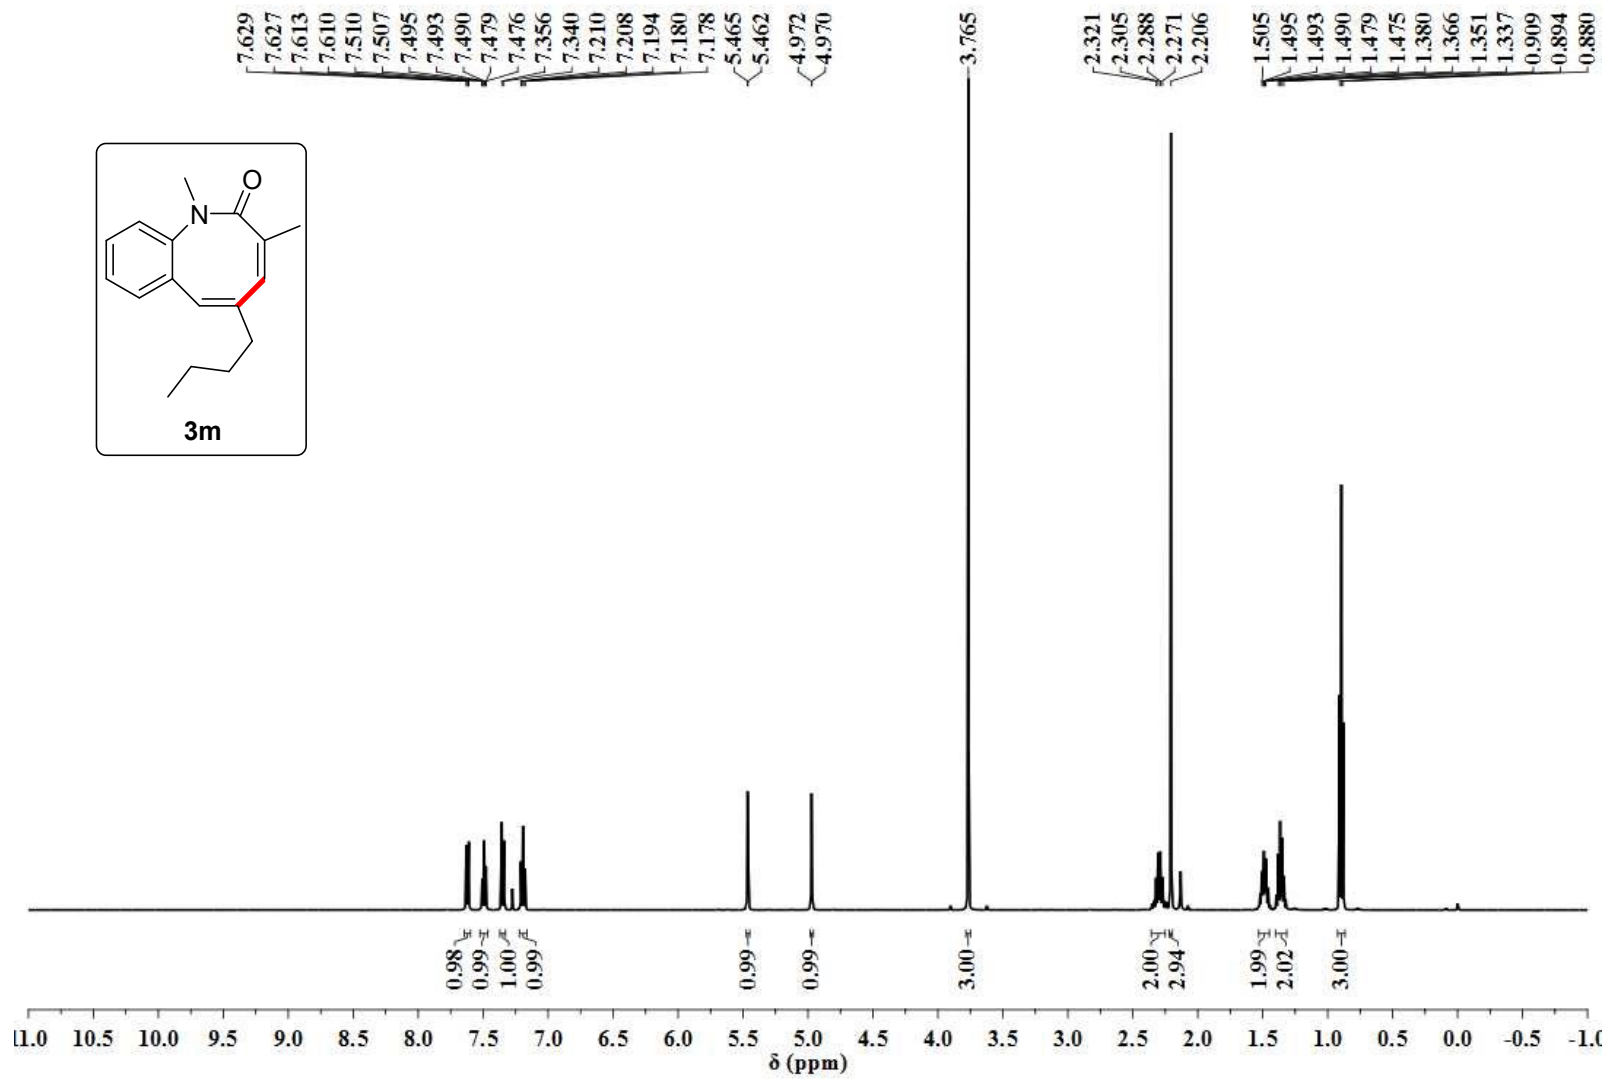

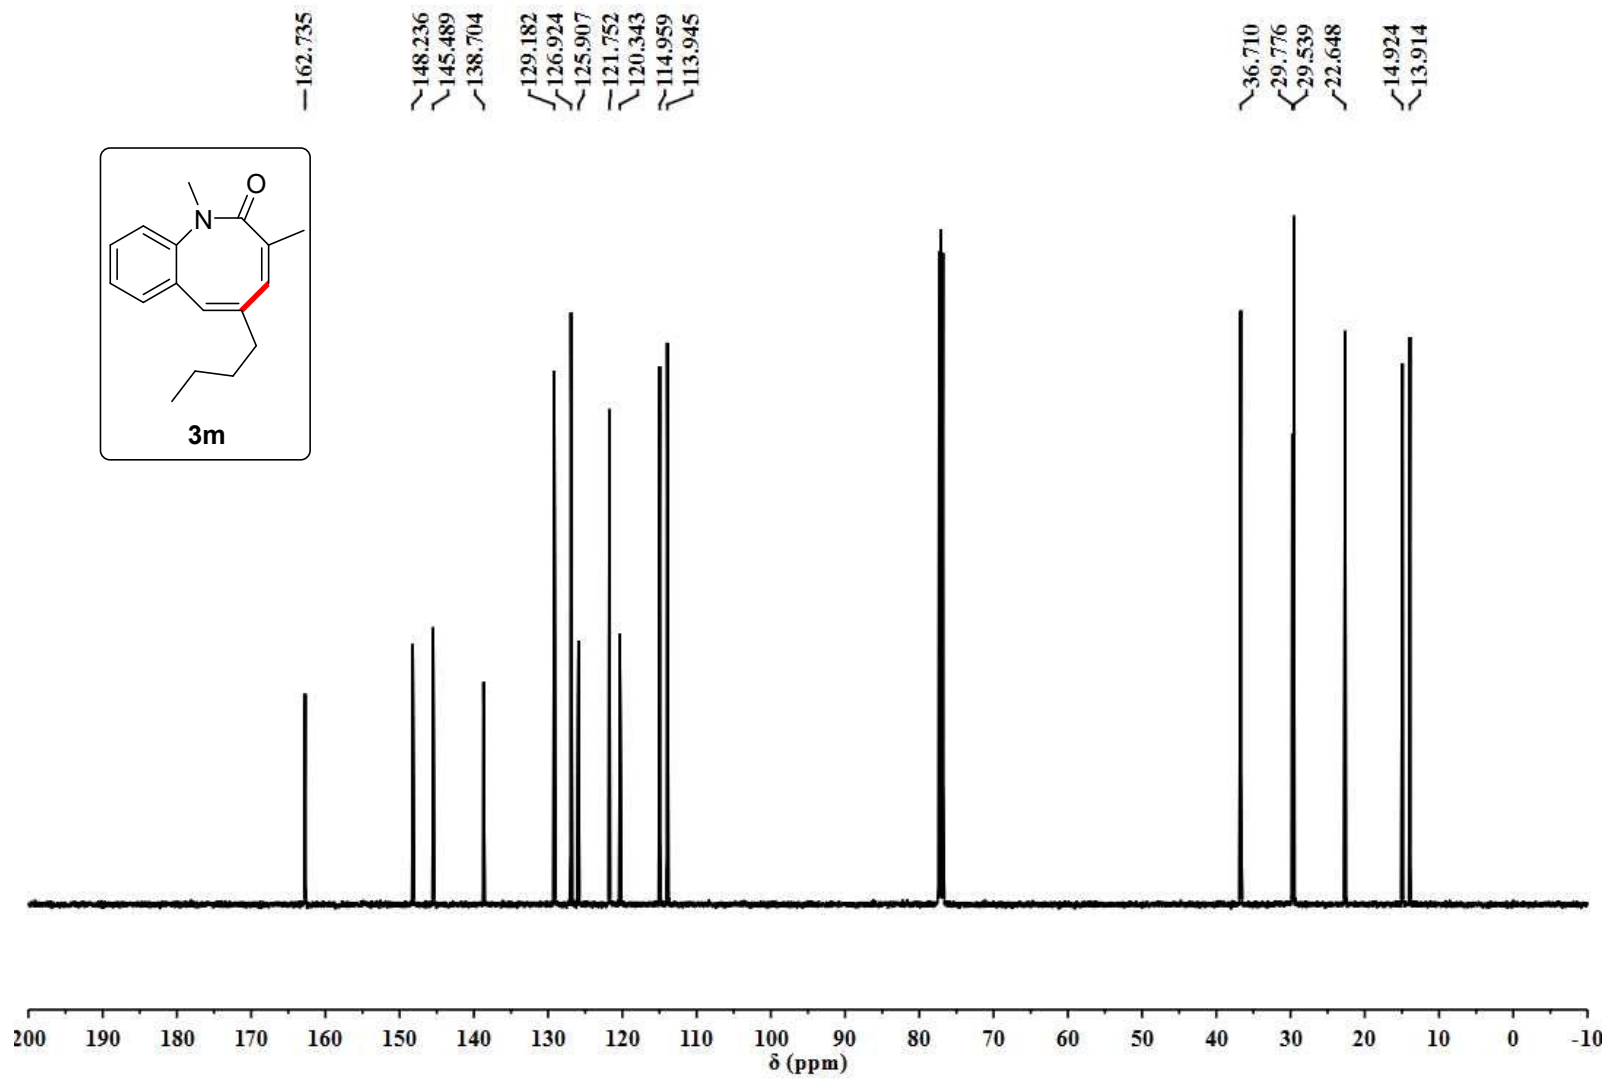

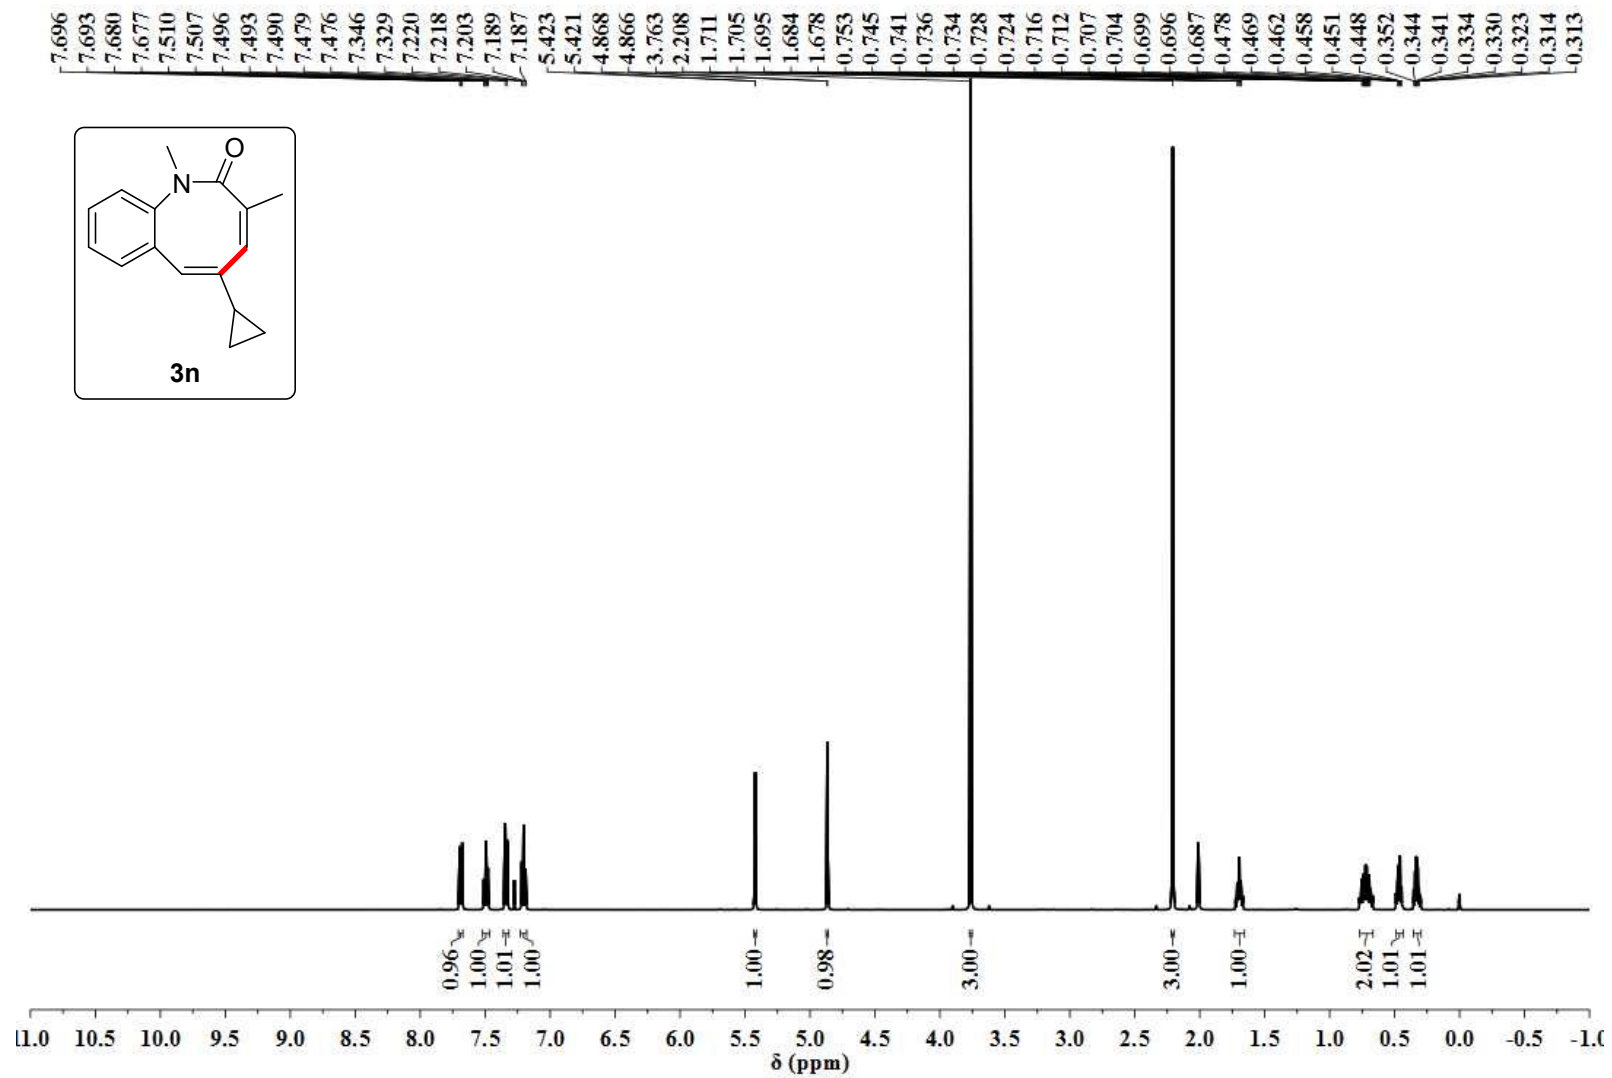

S125

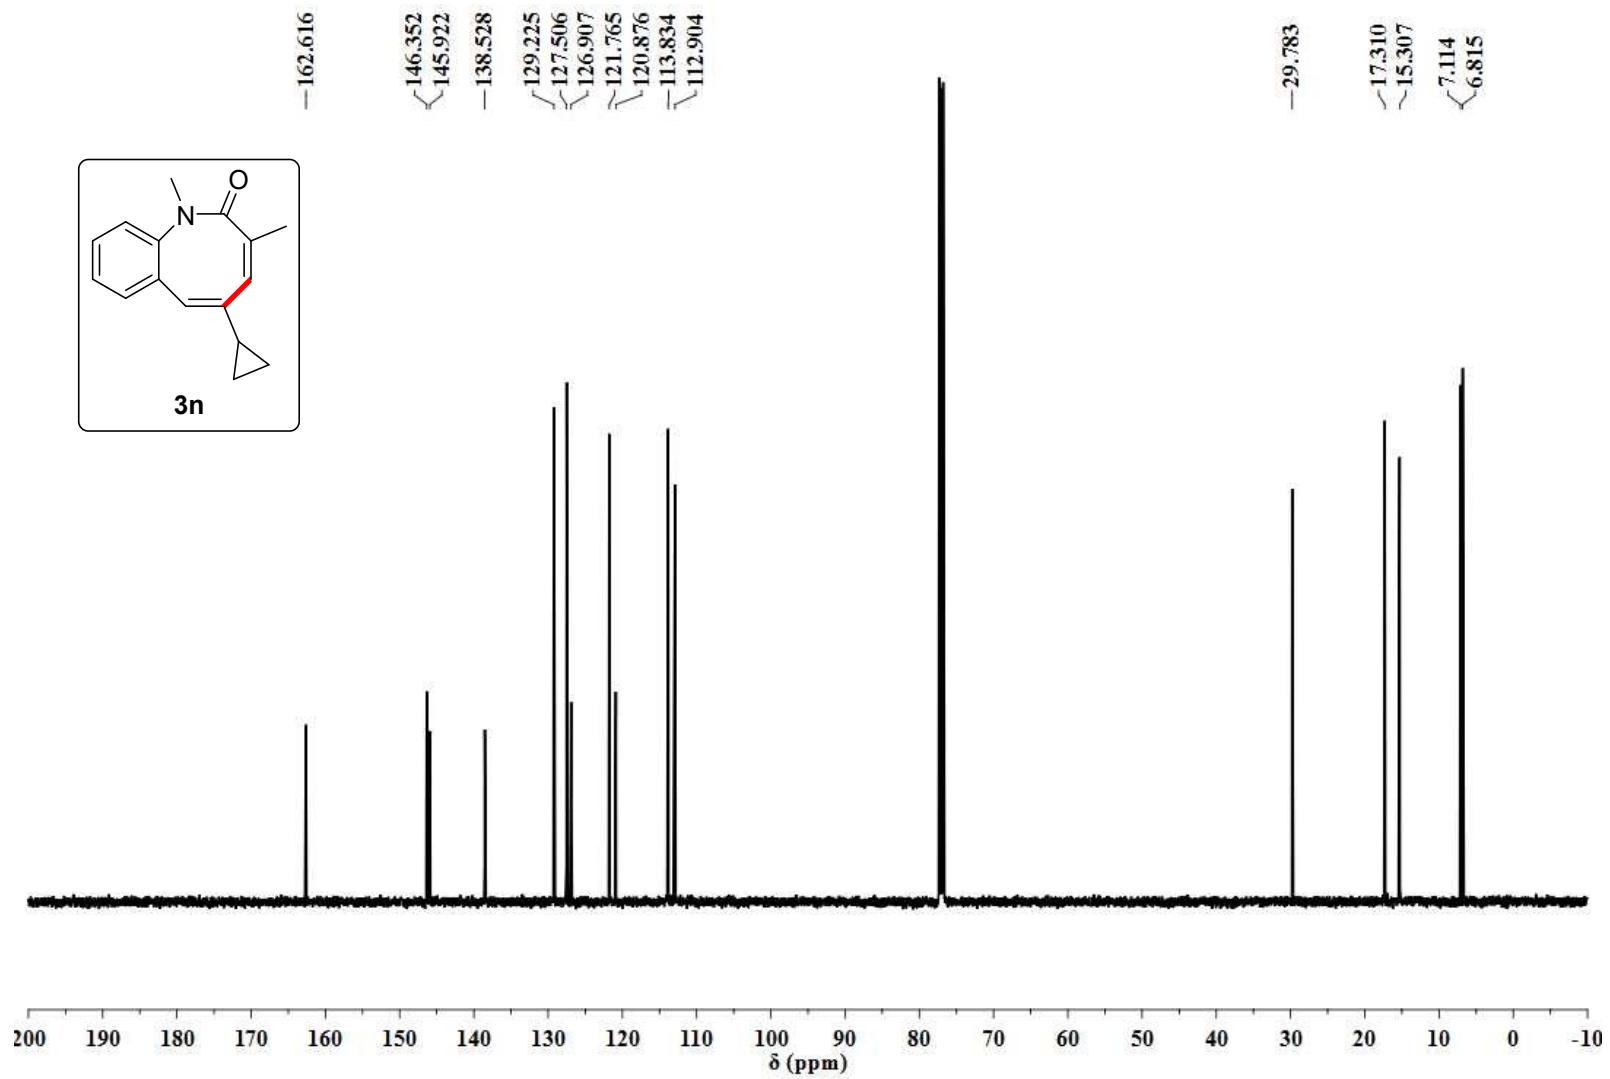

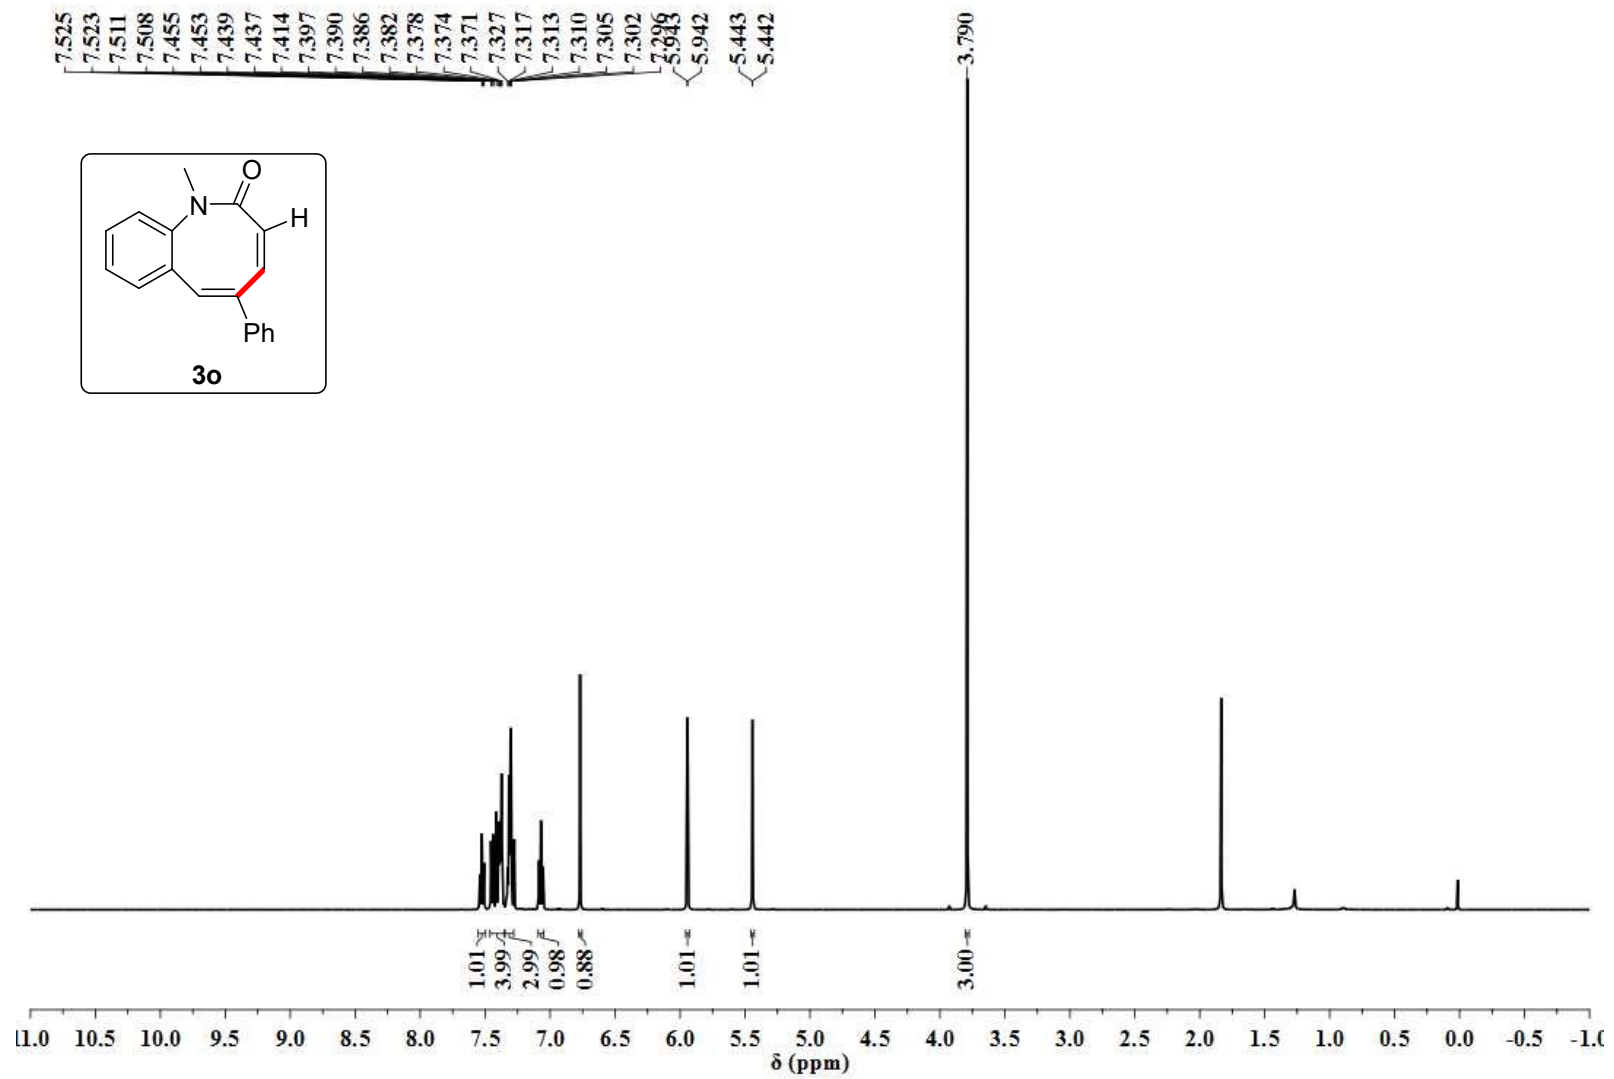

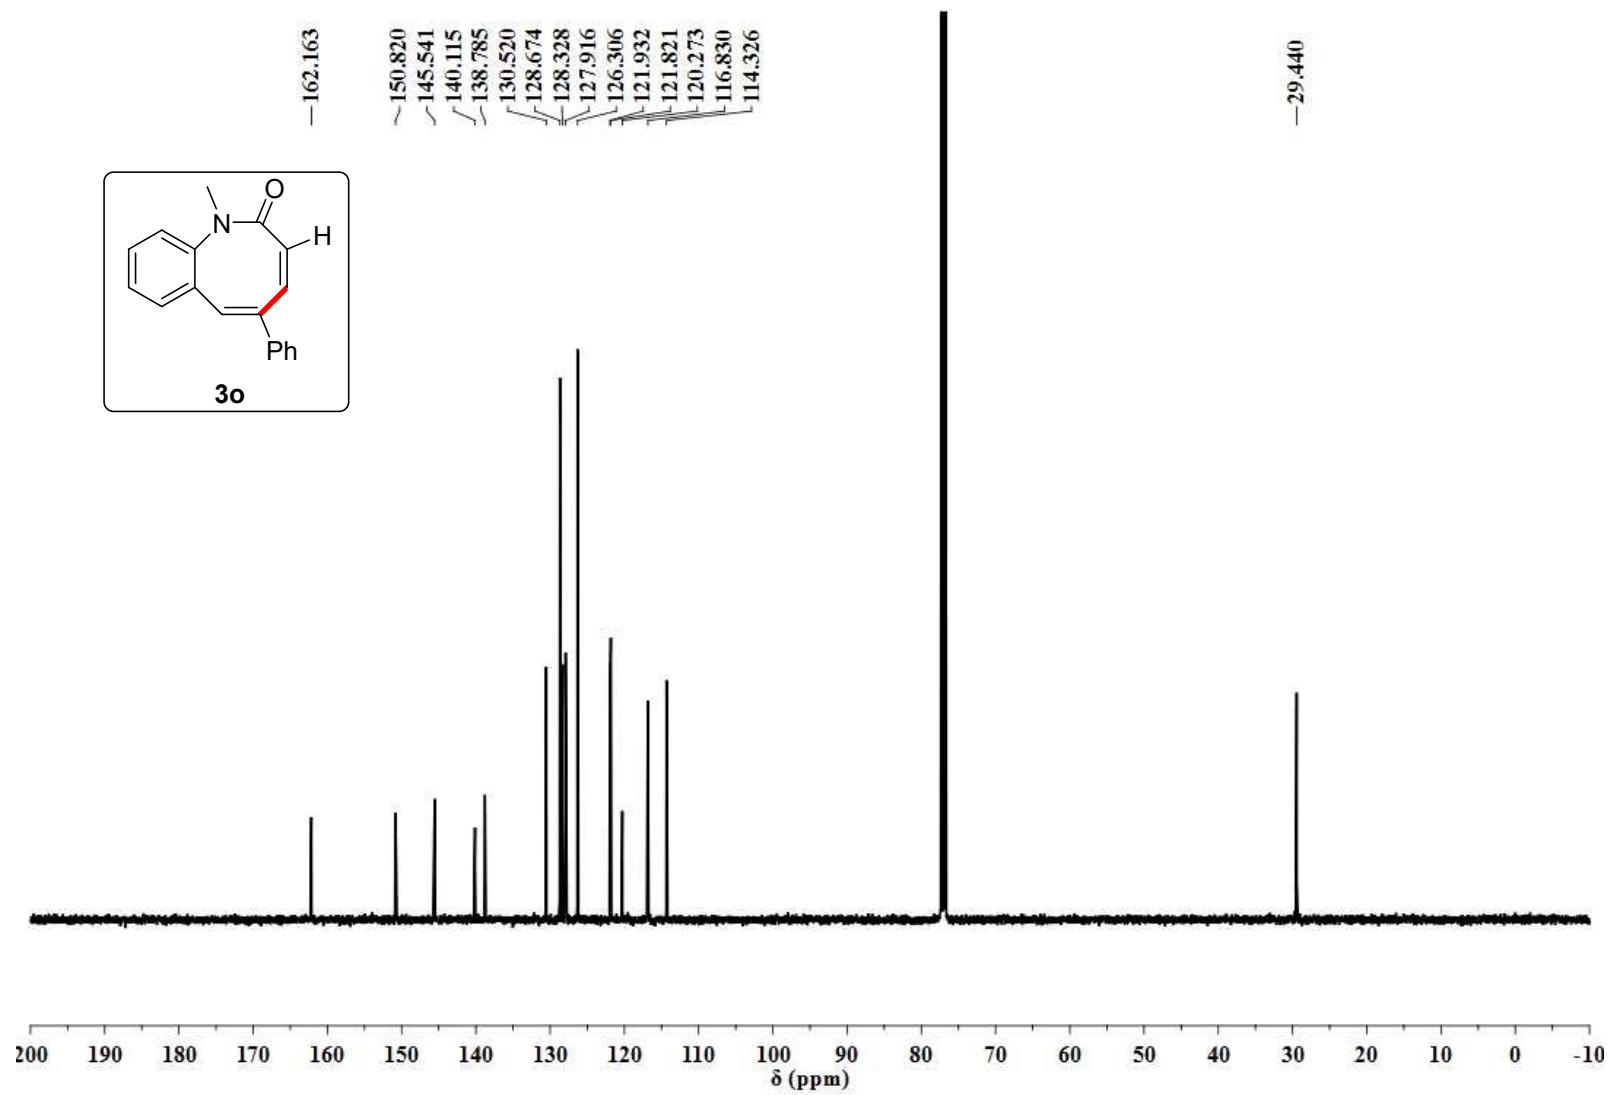



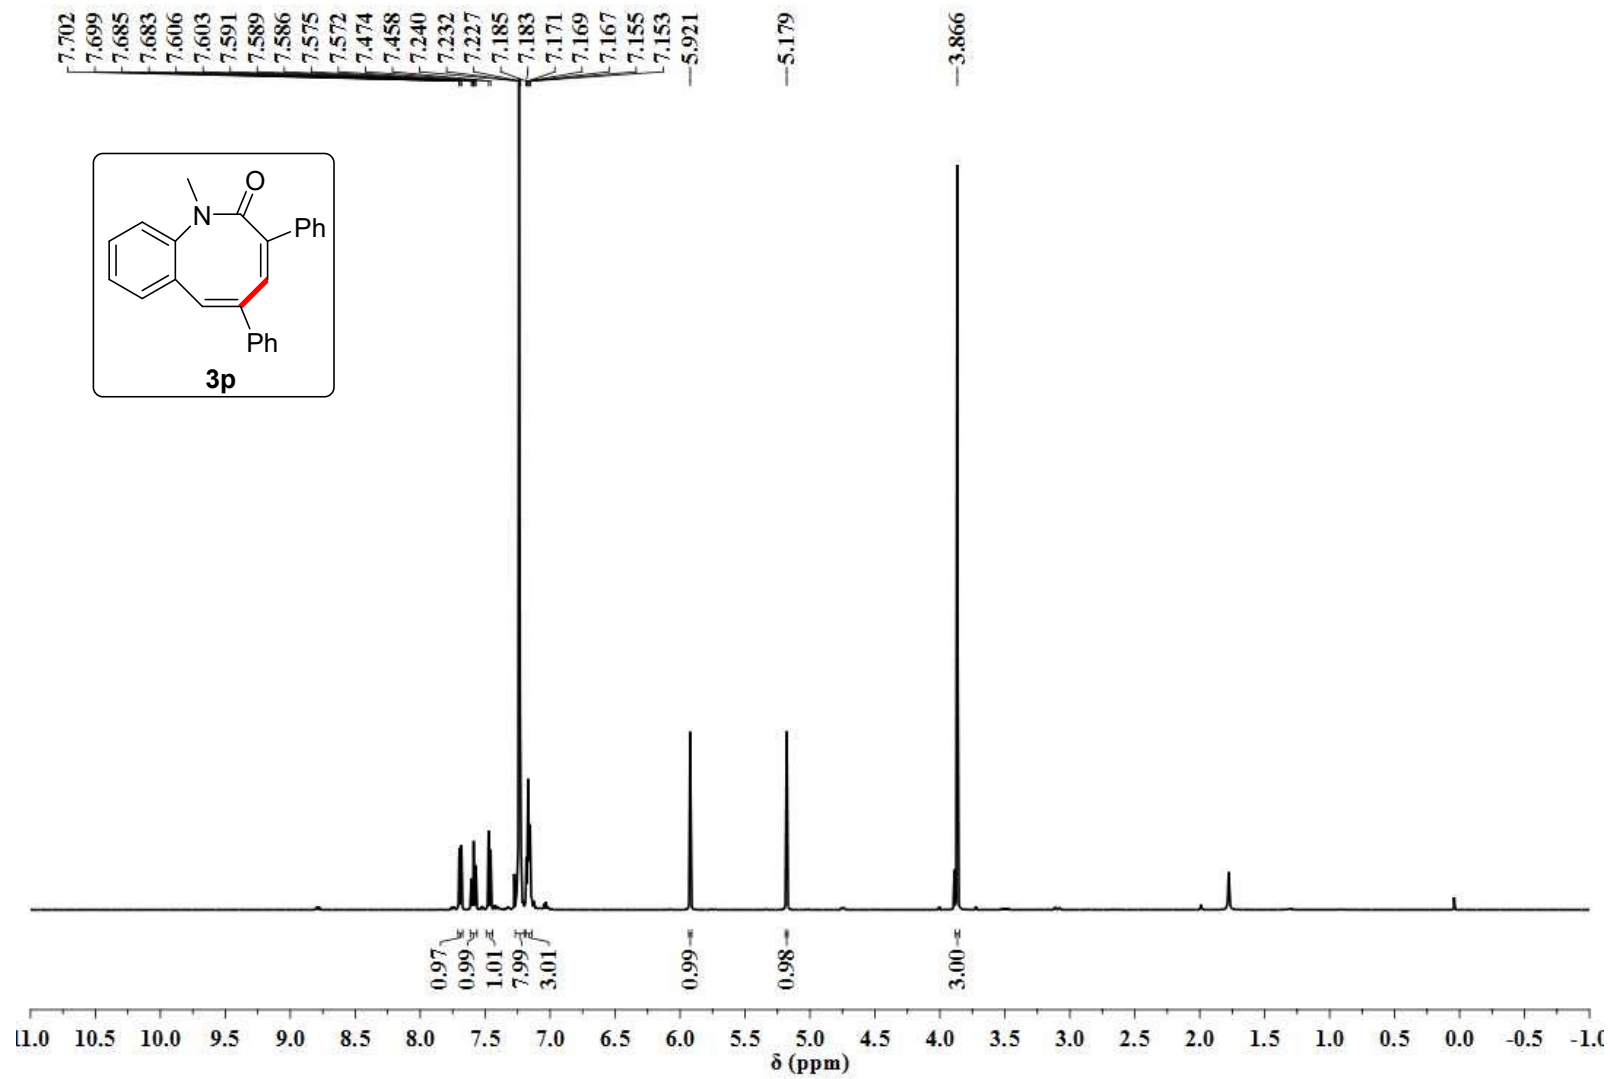

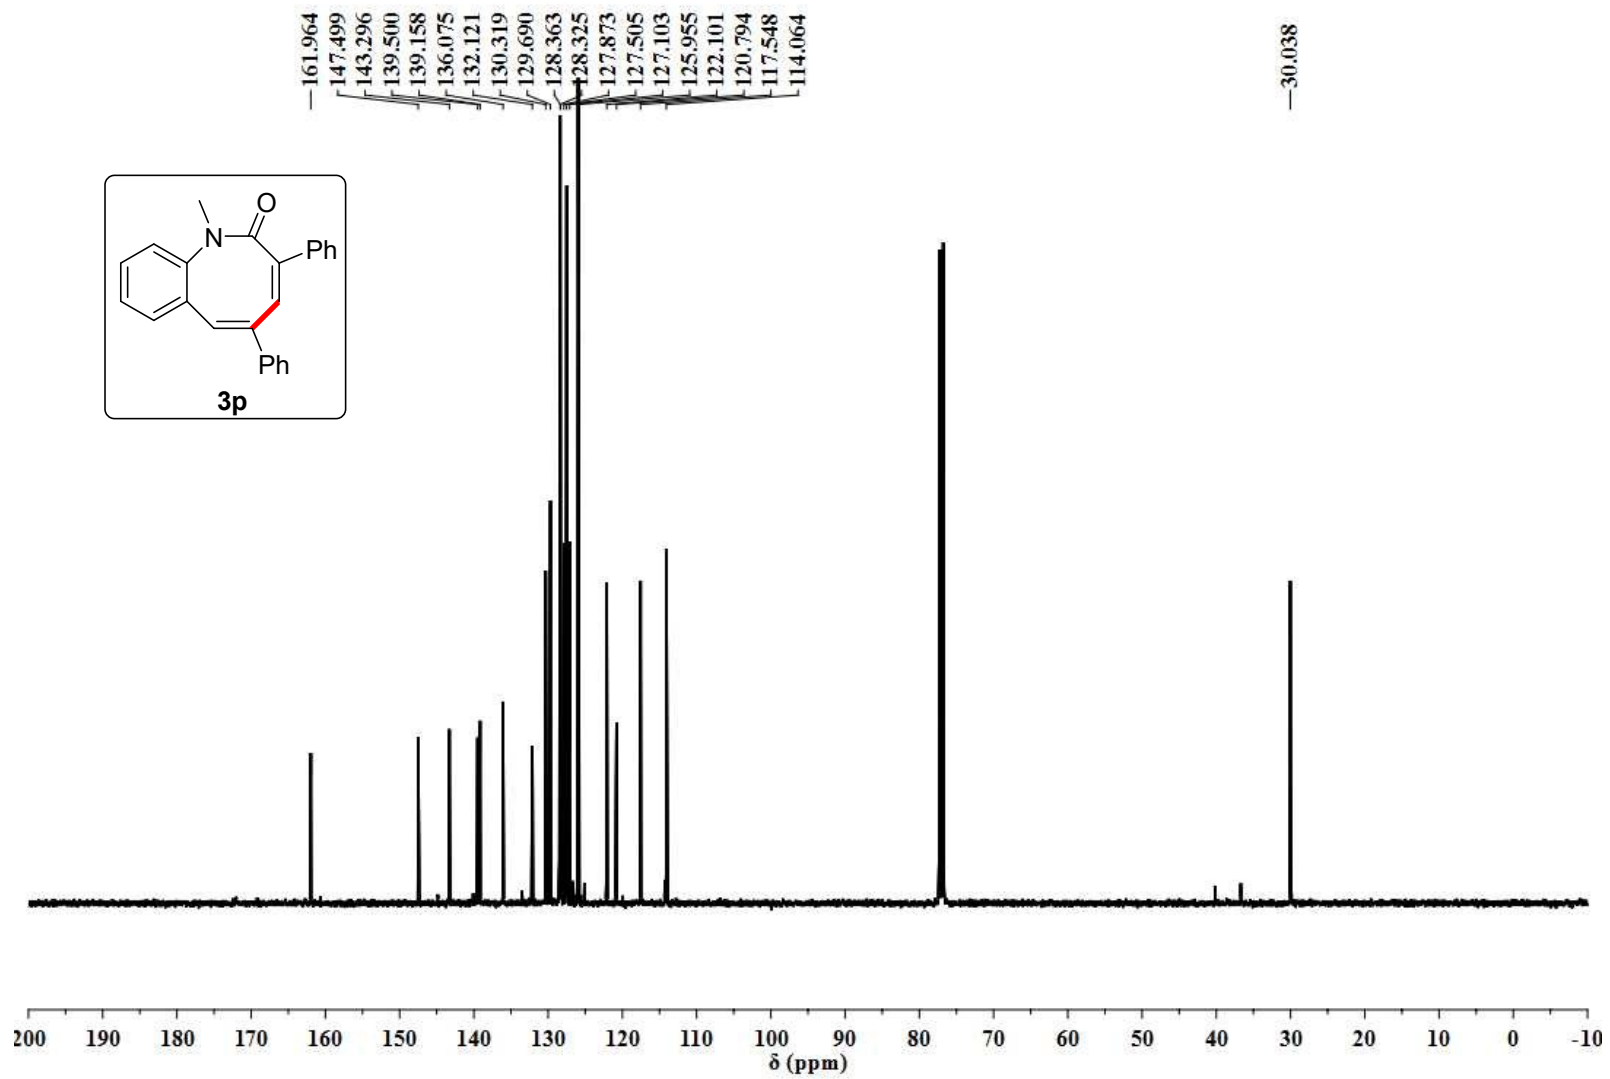

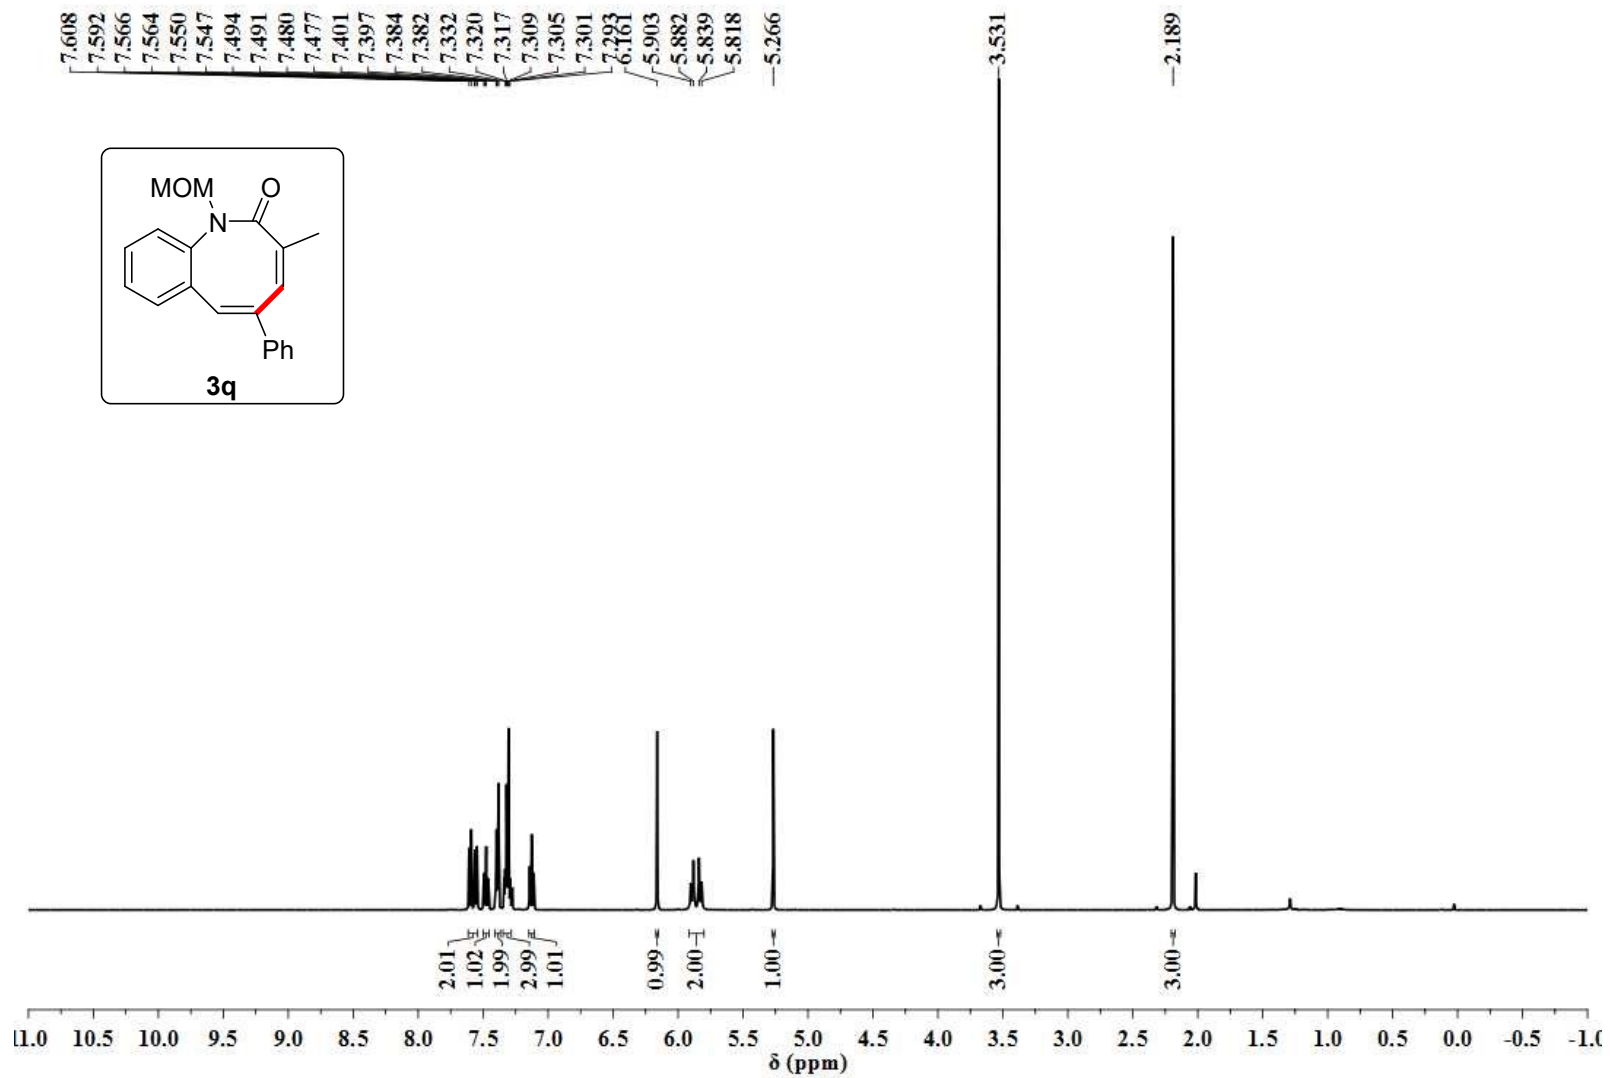

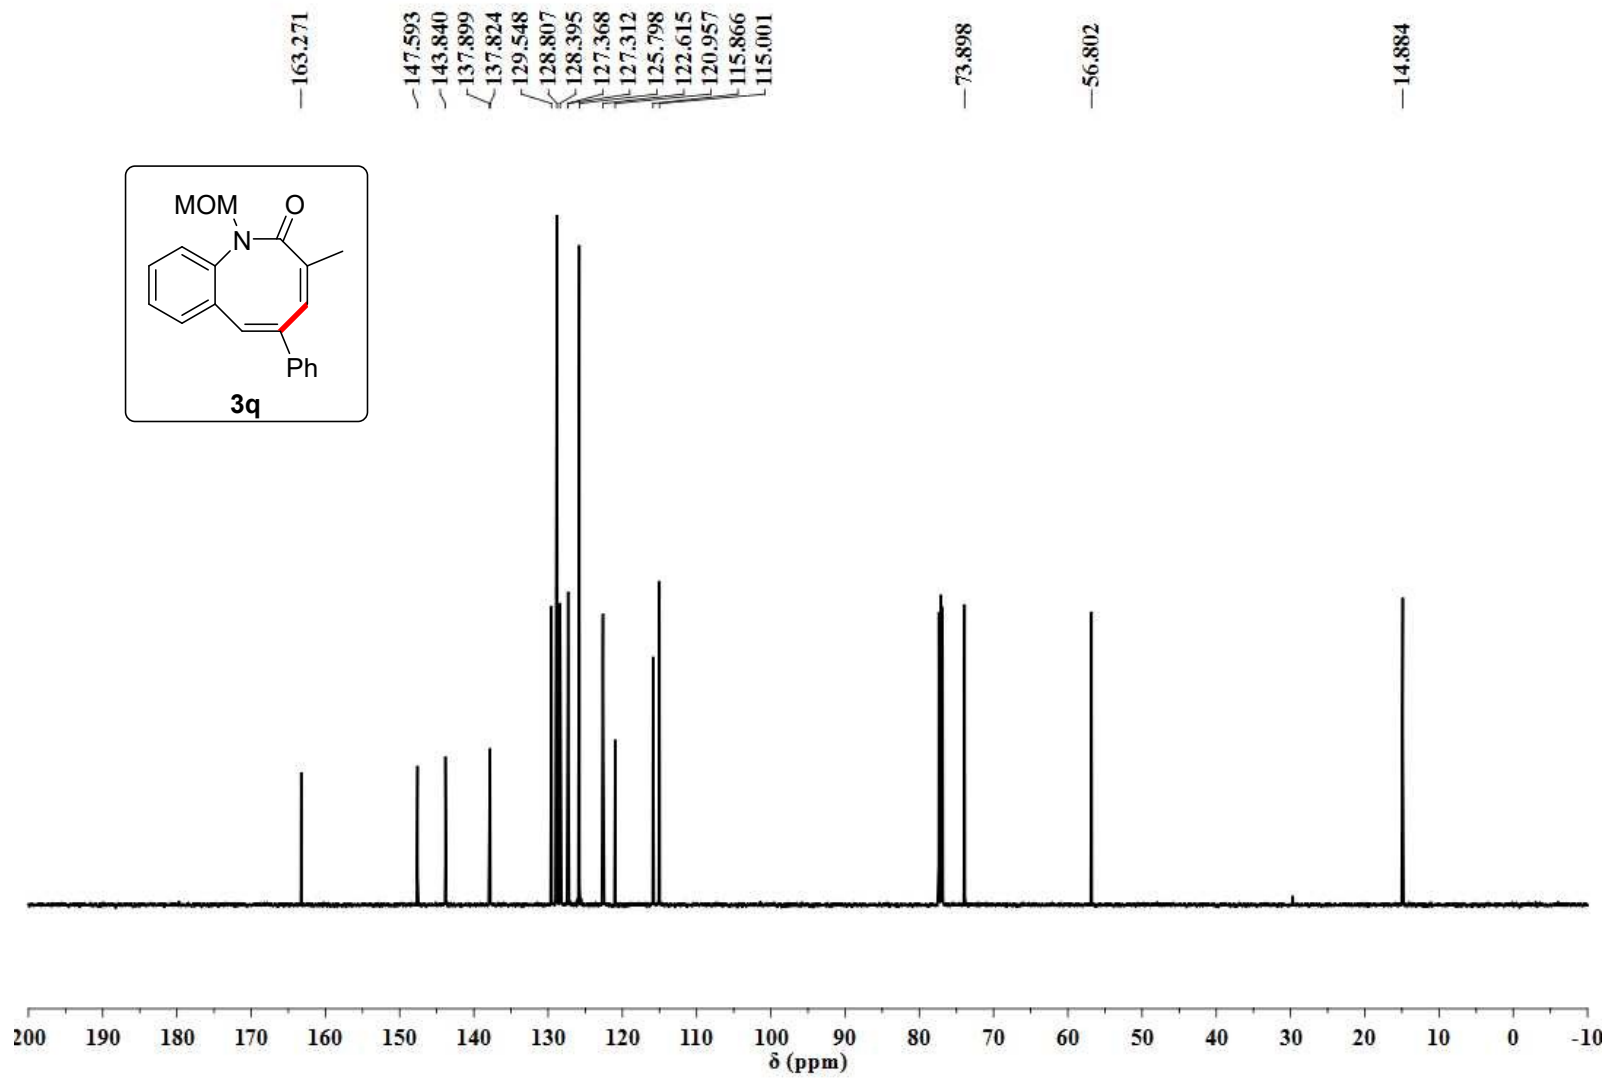

S132

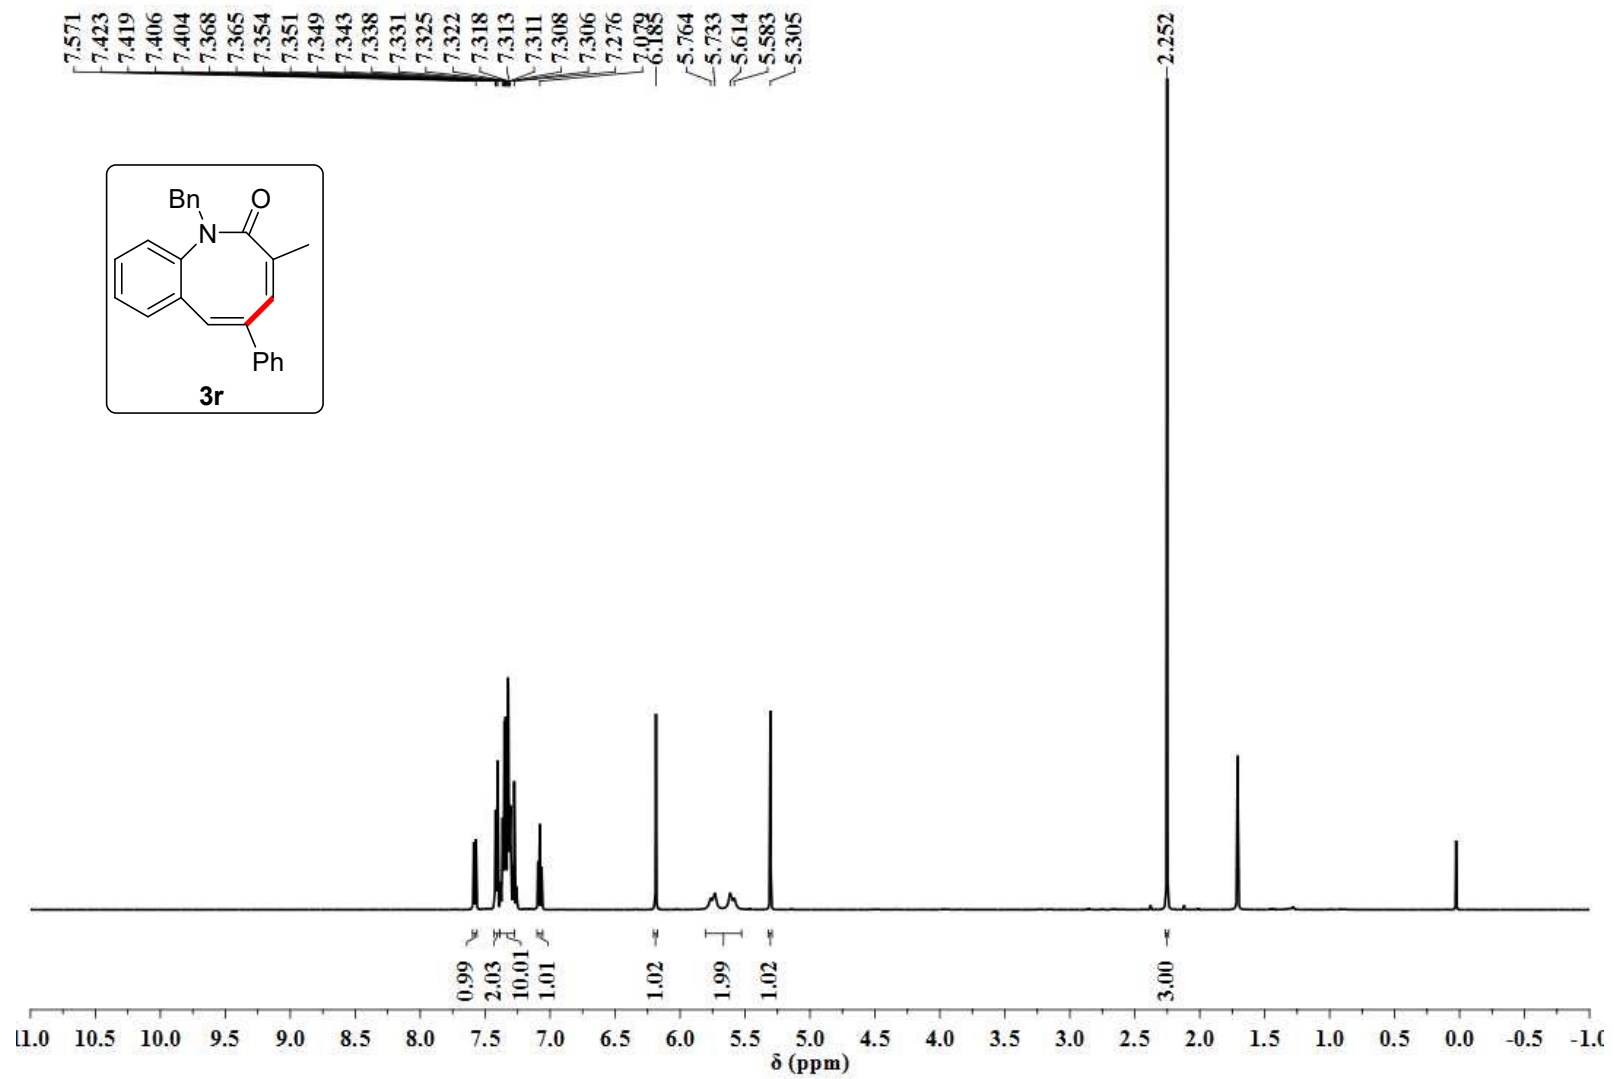

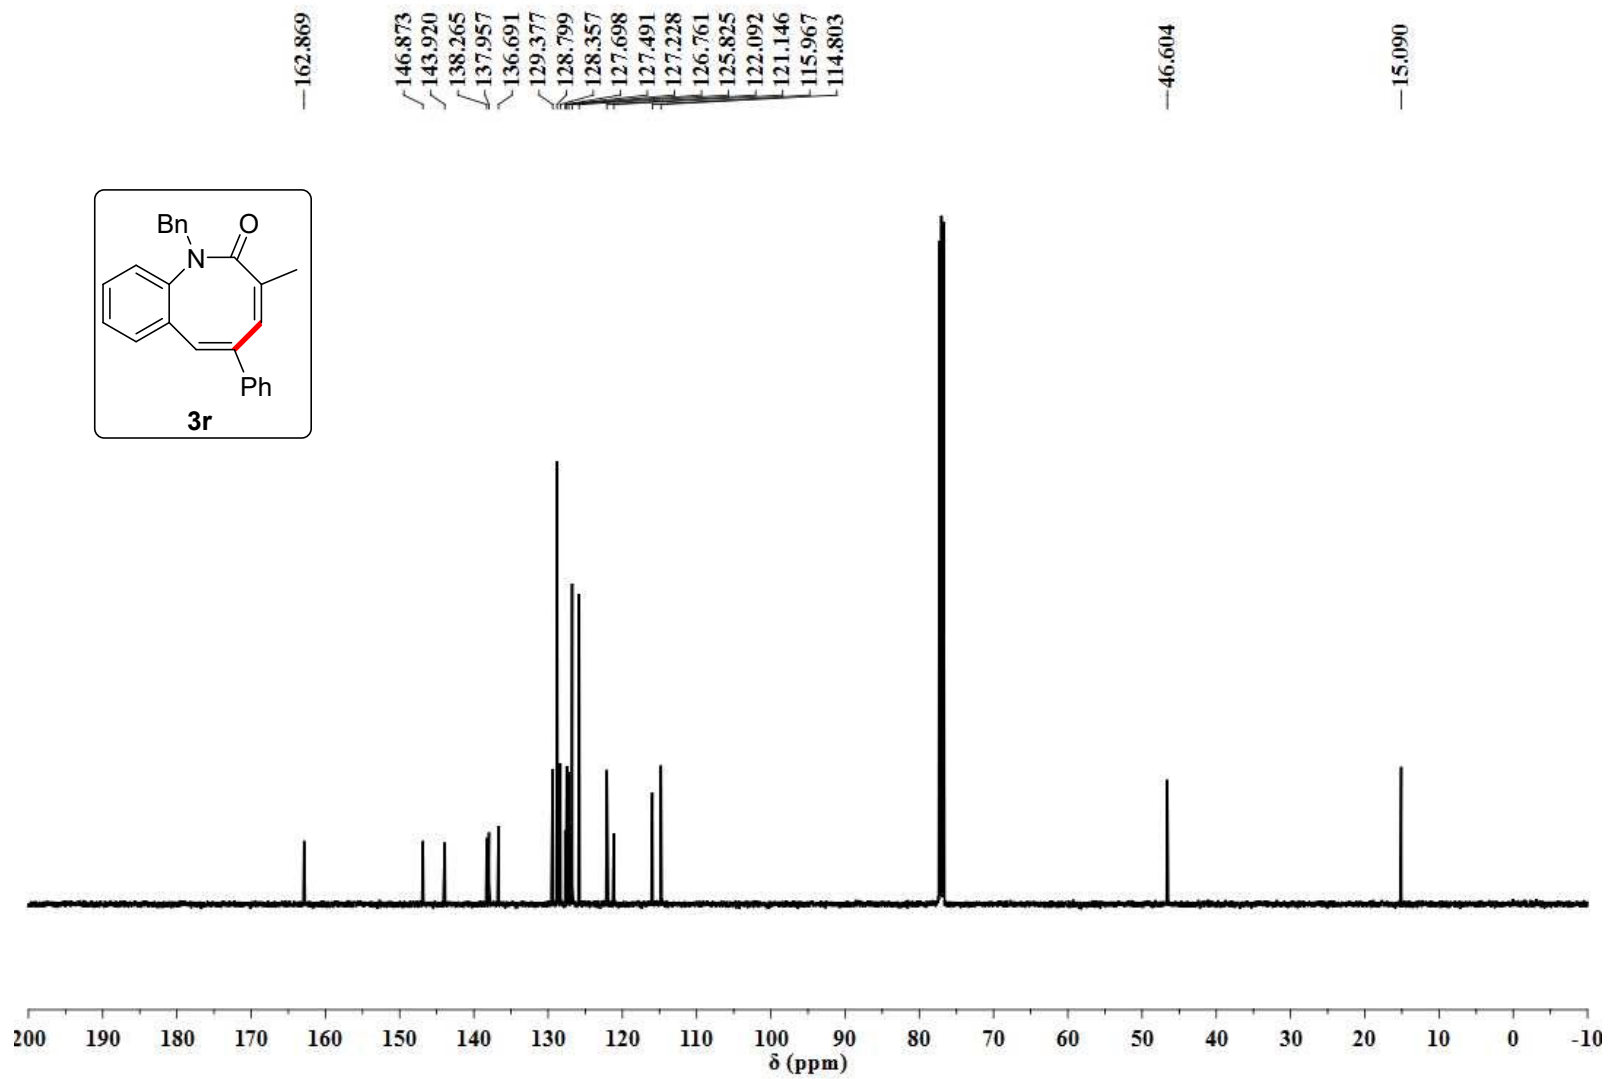

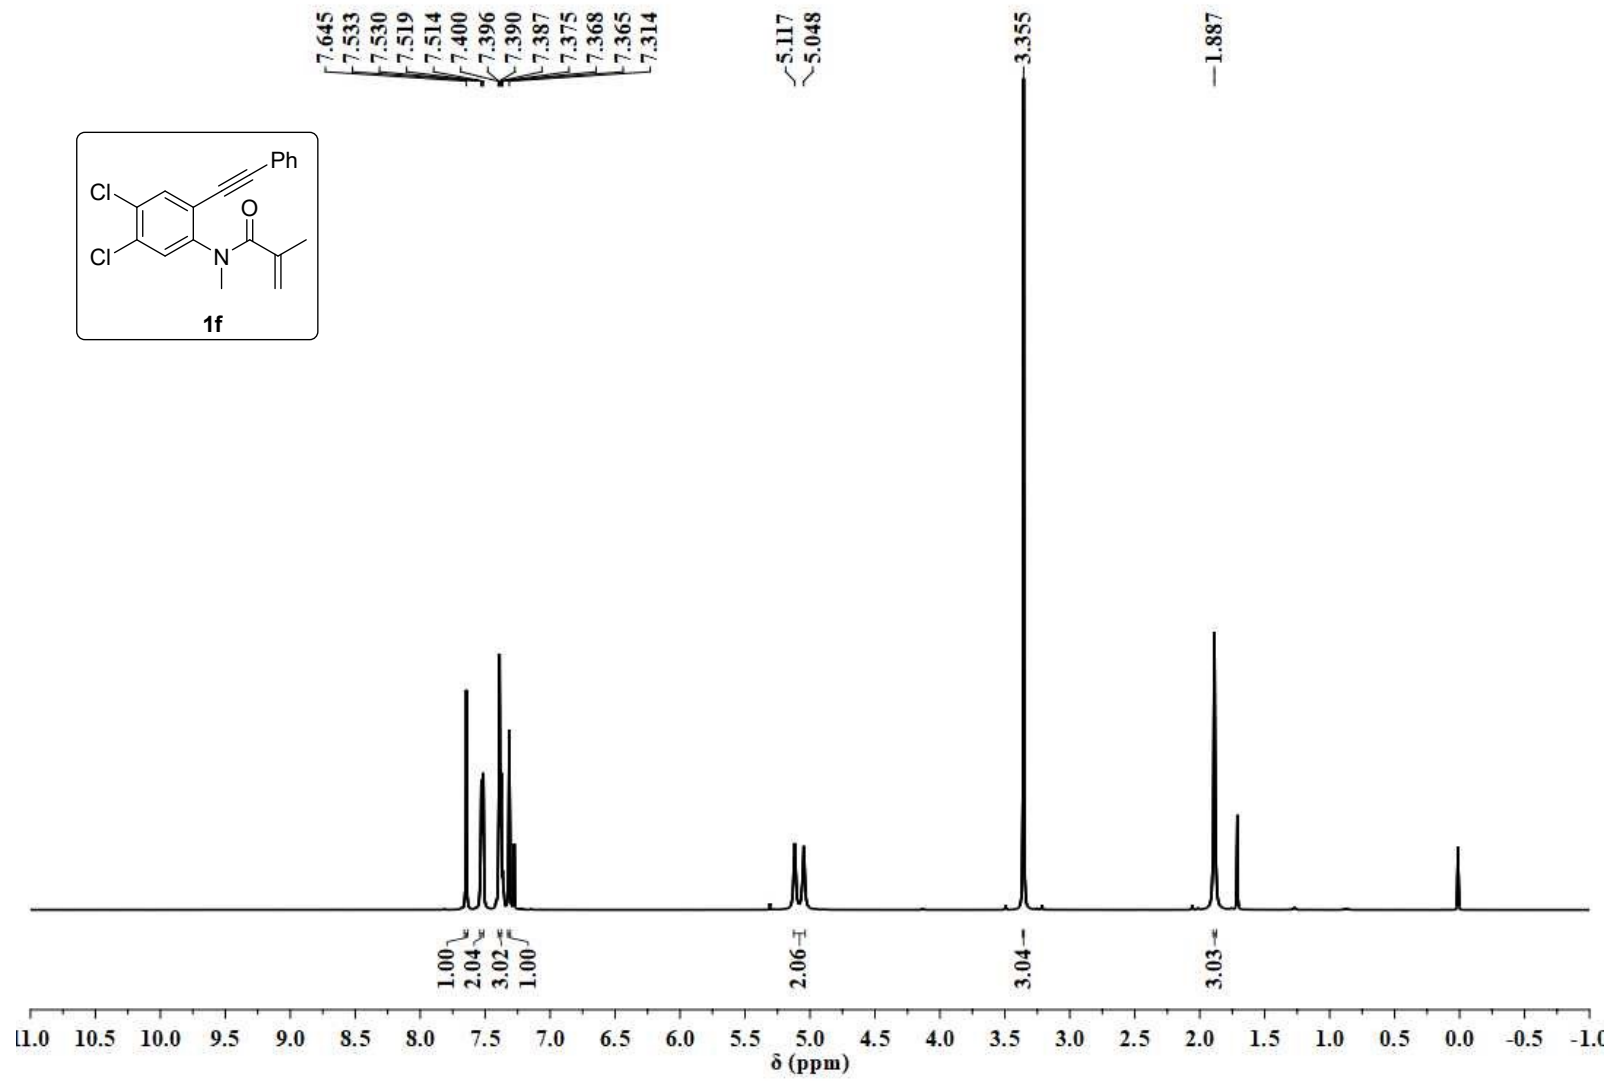

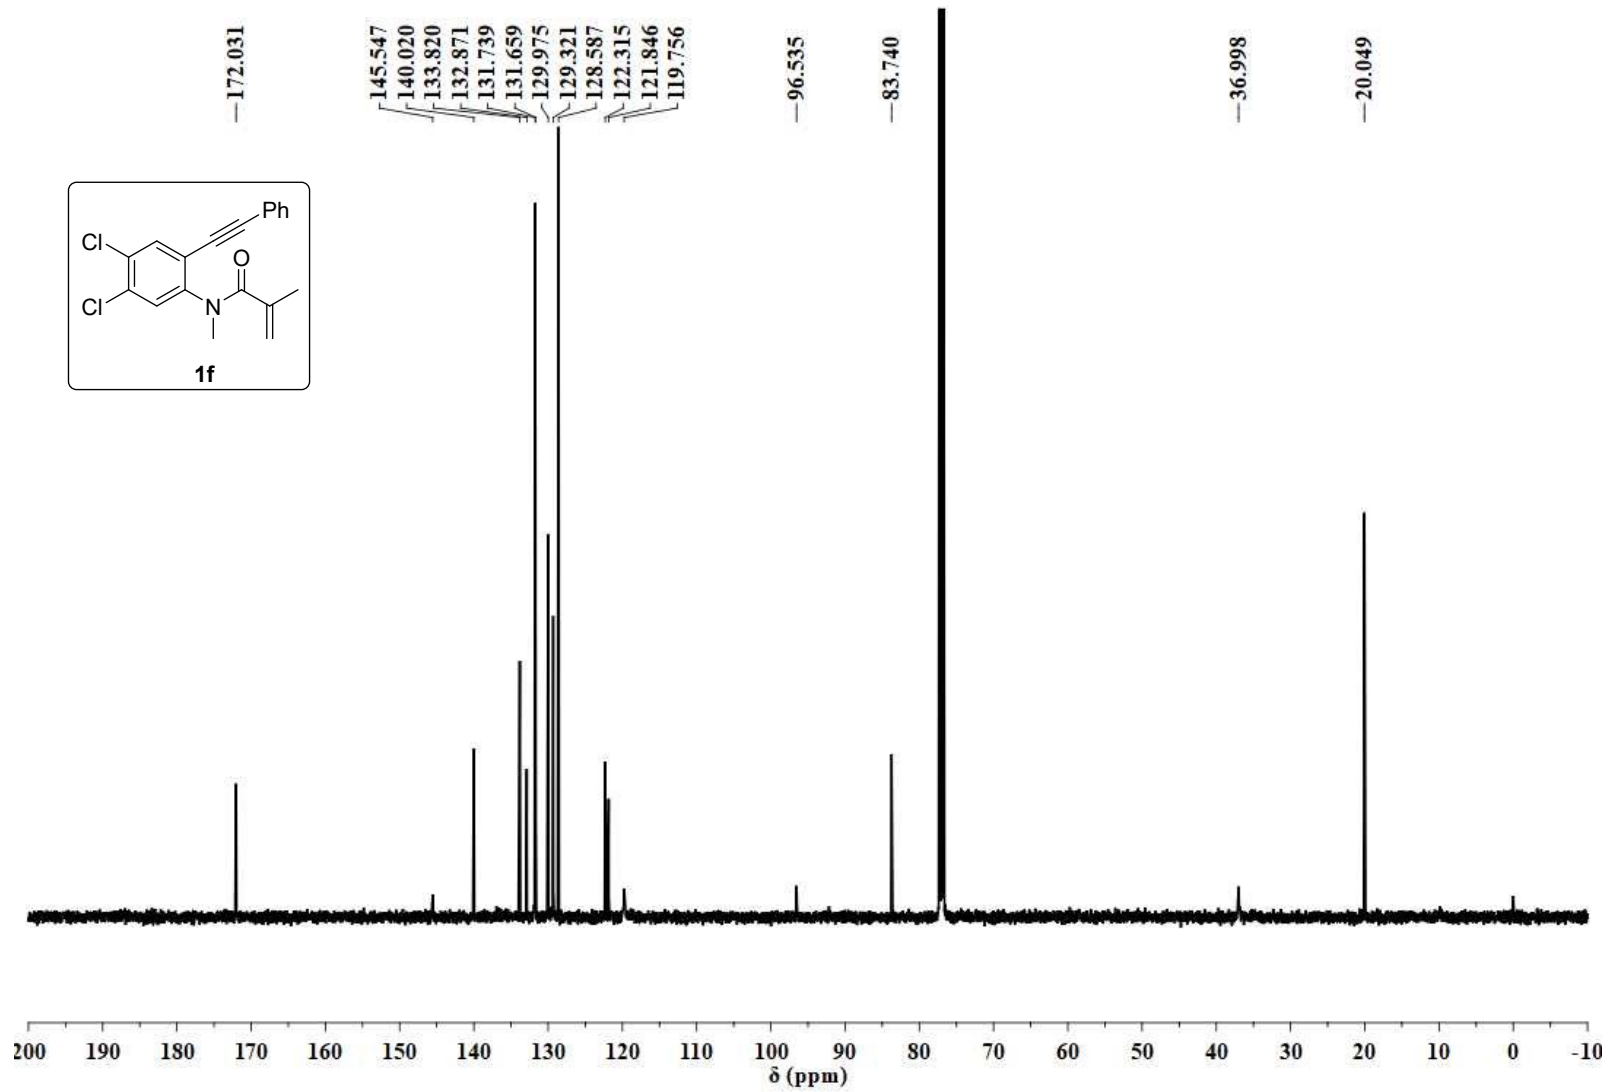



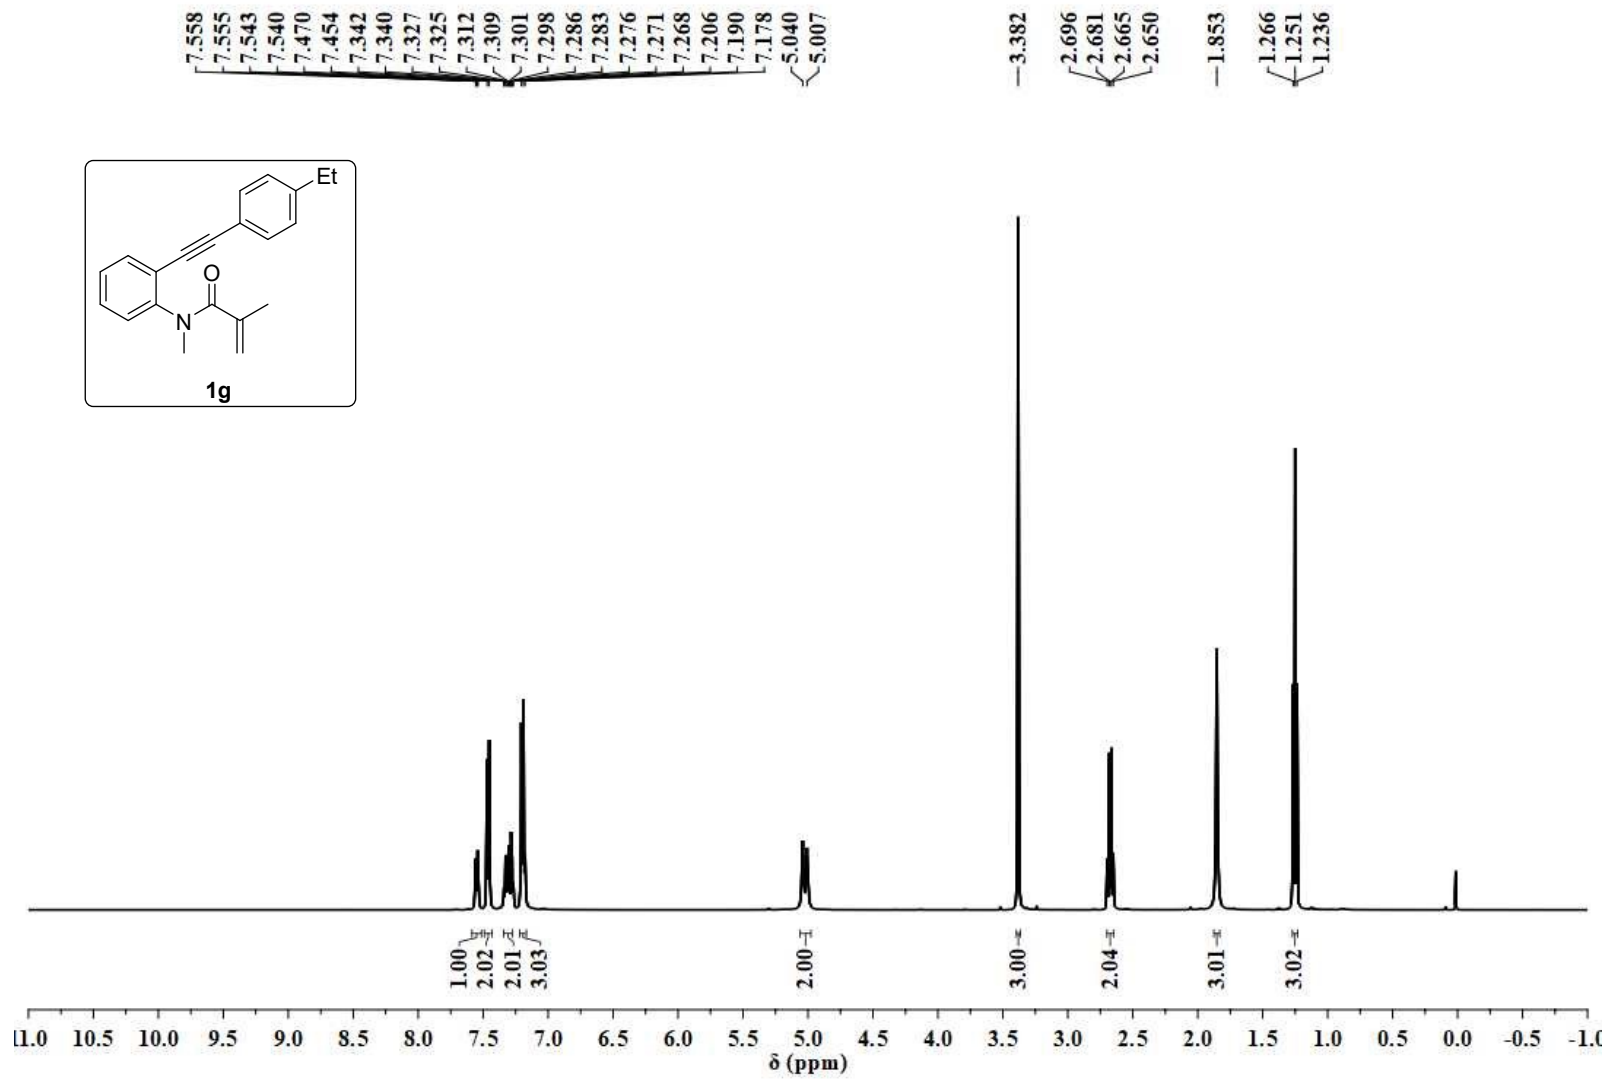

S137

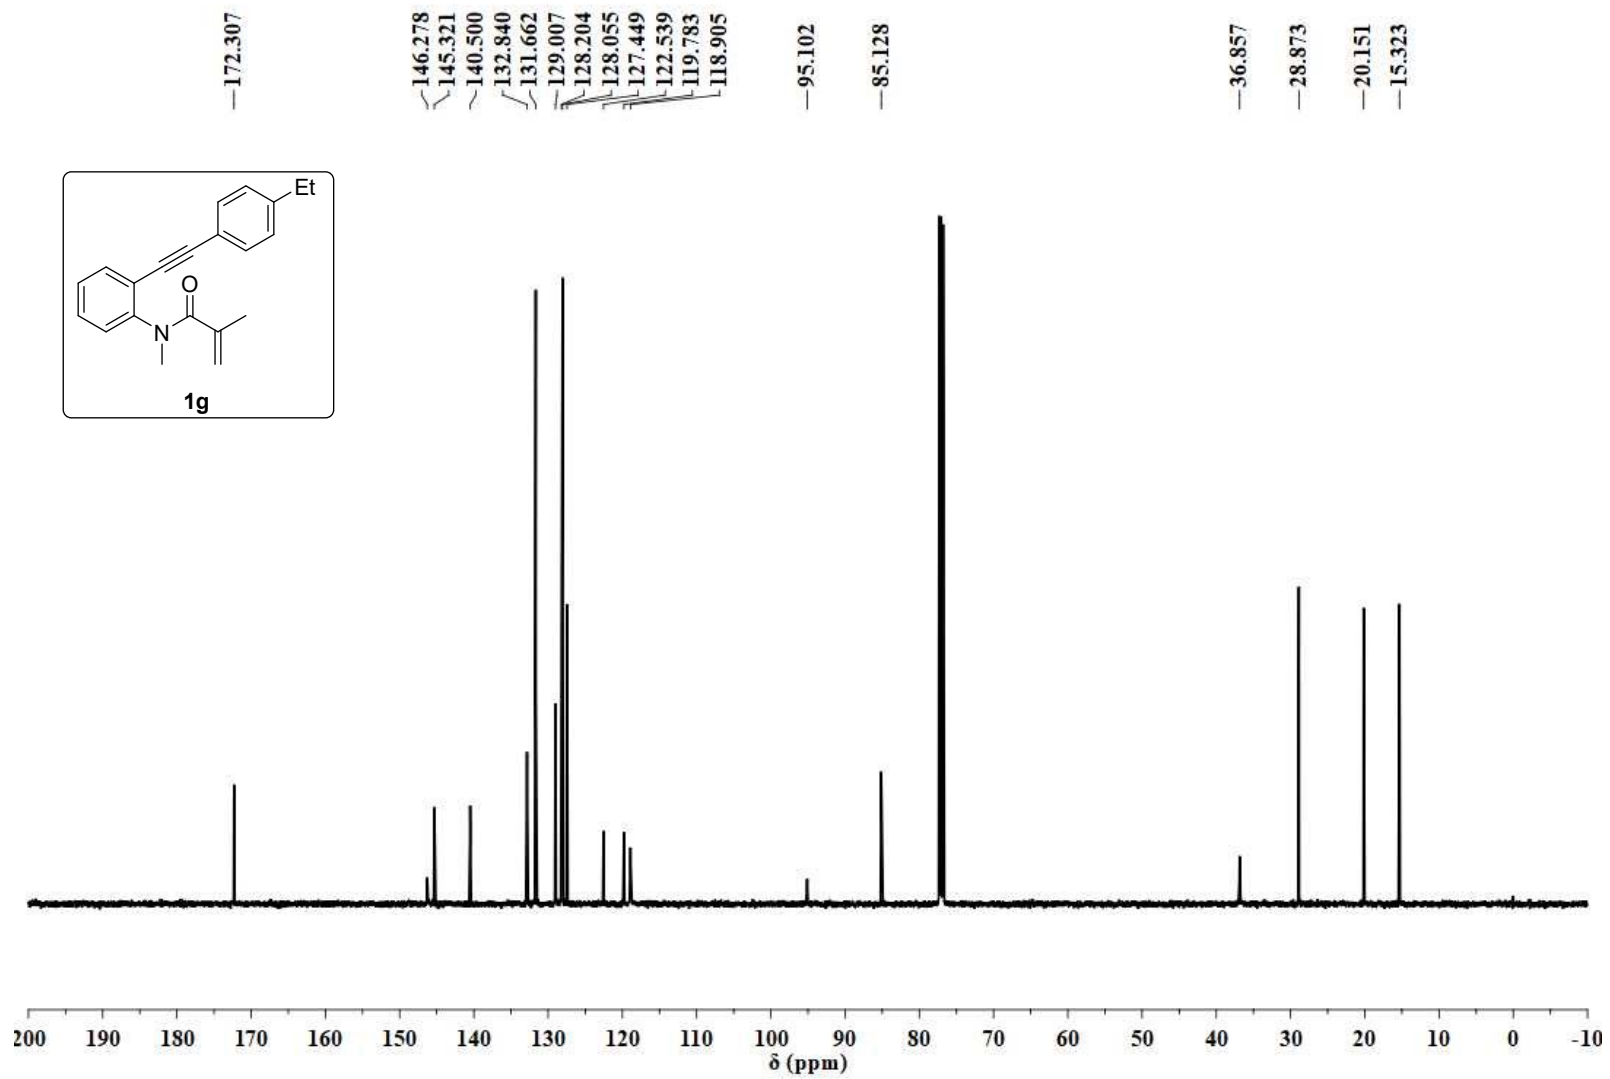

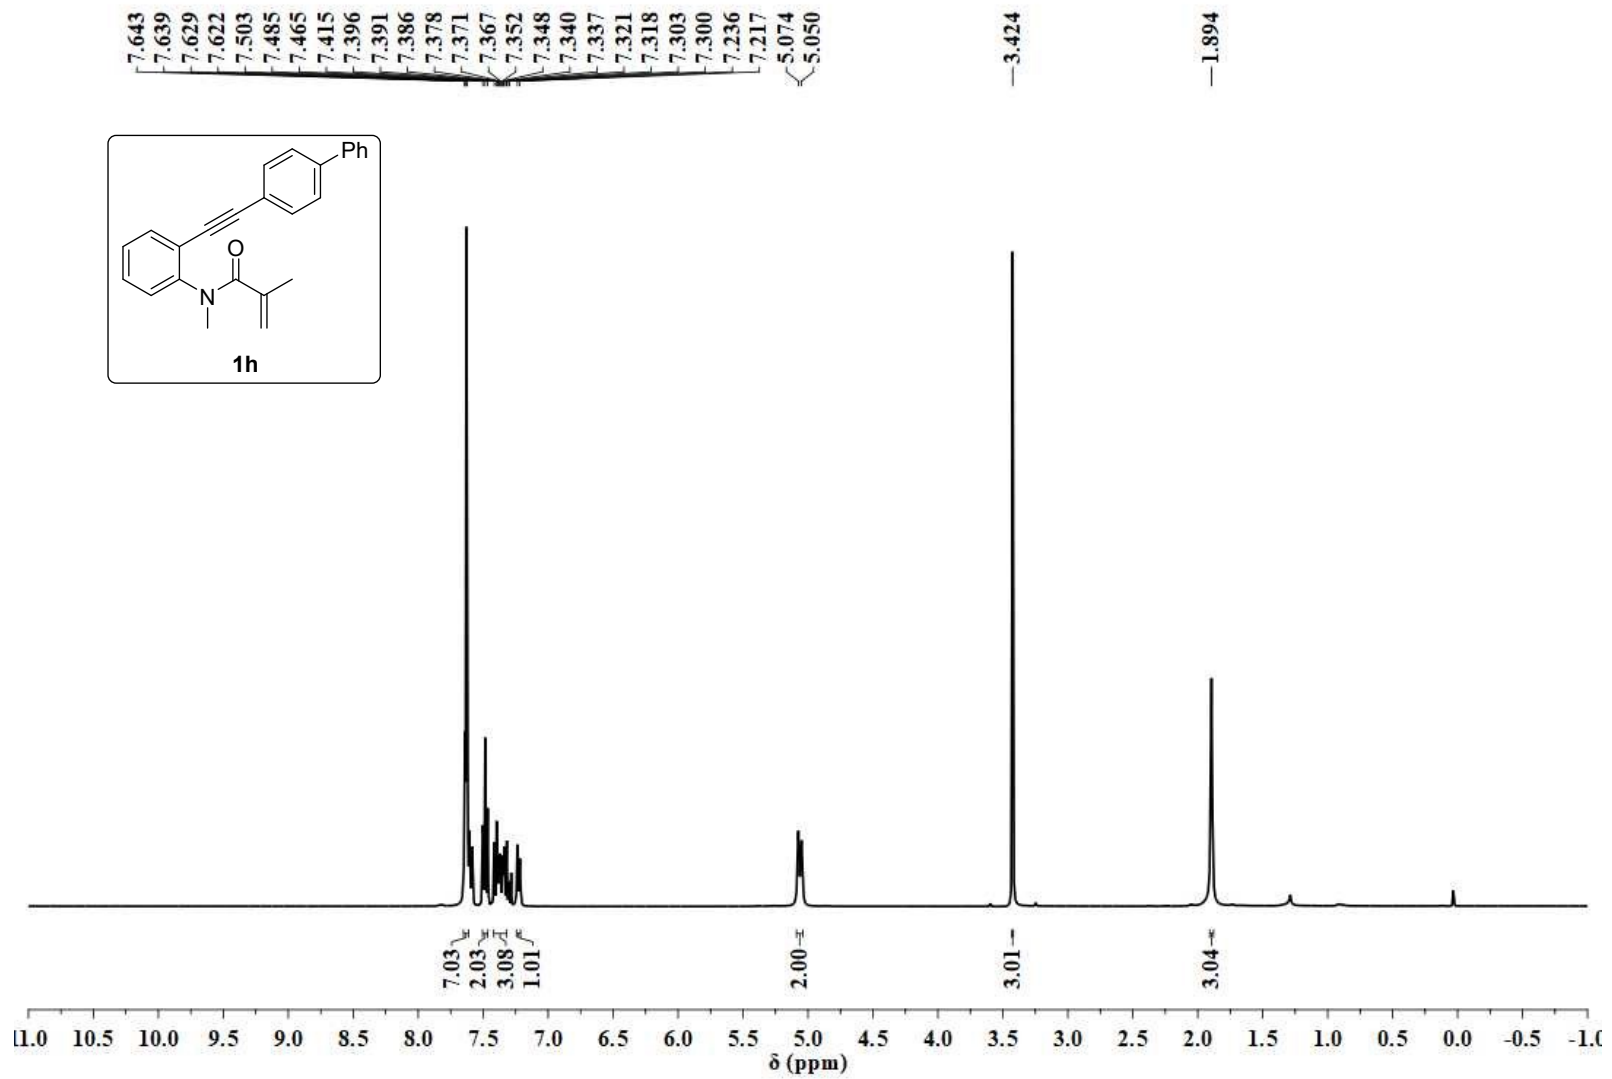

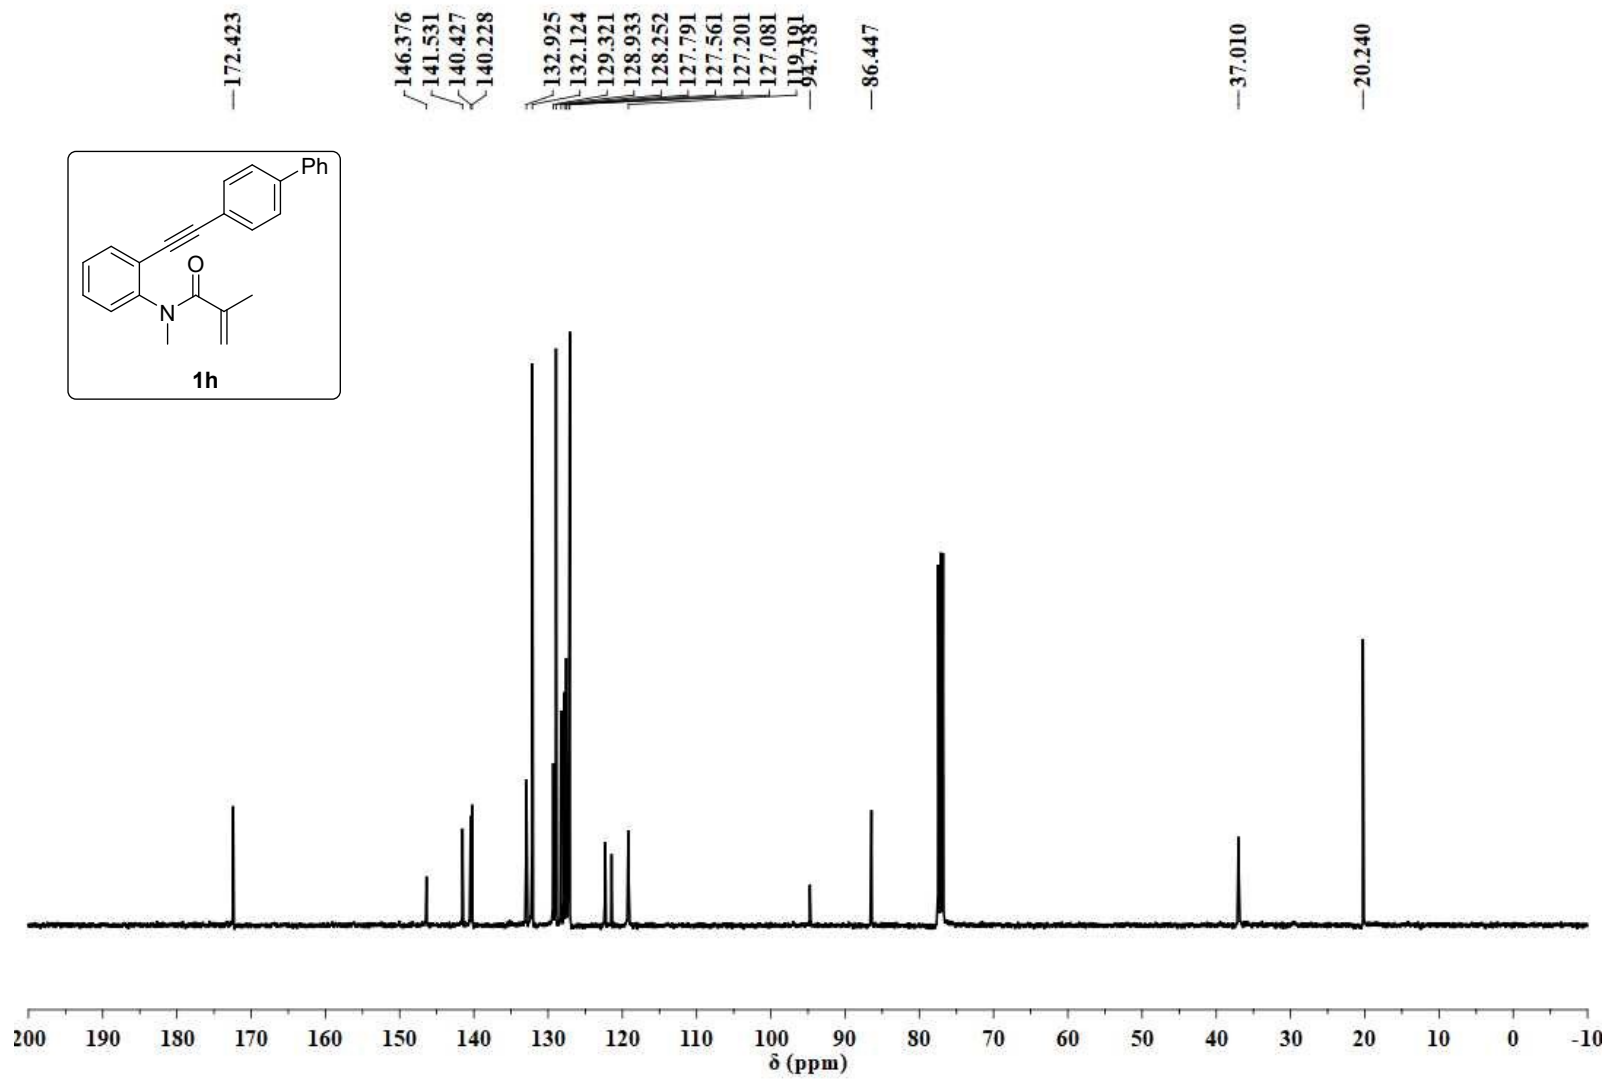

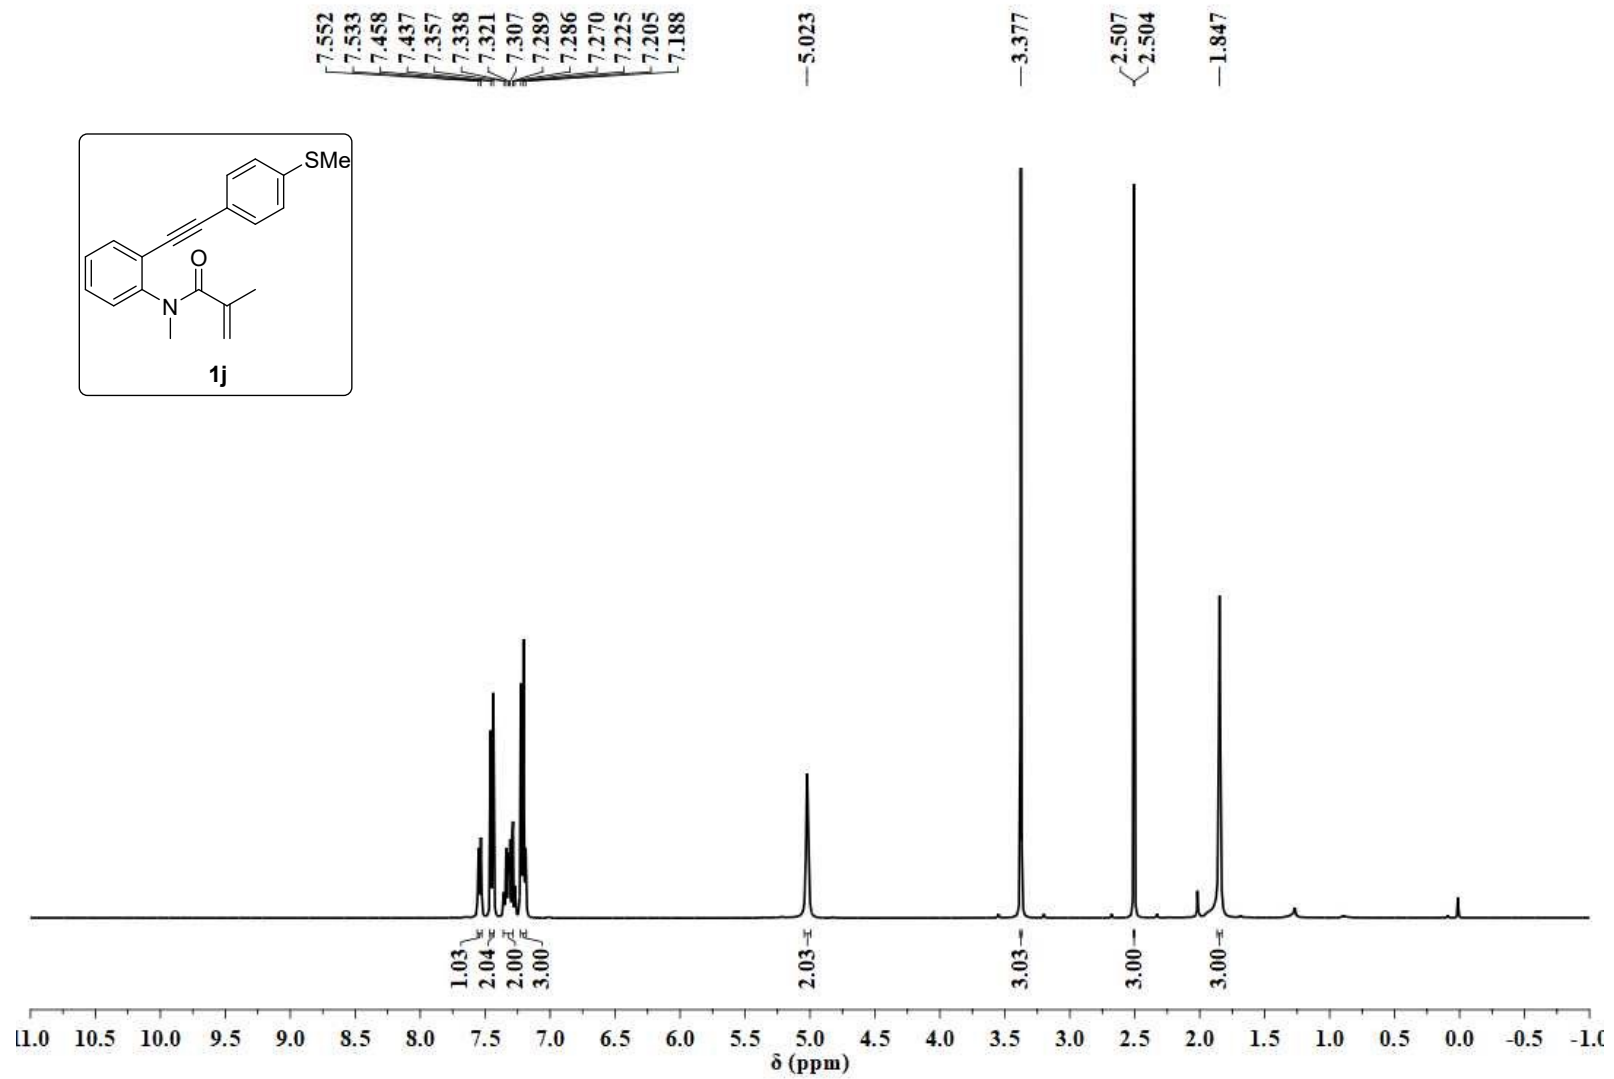

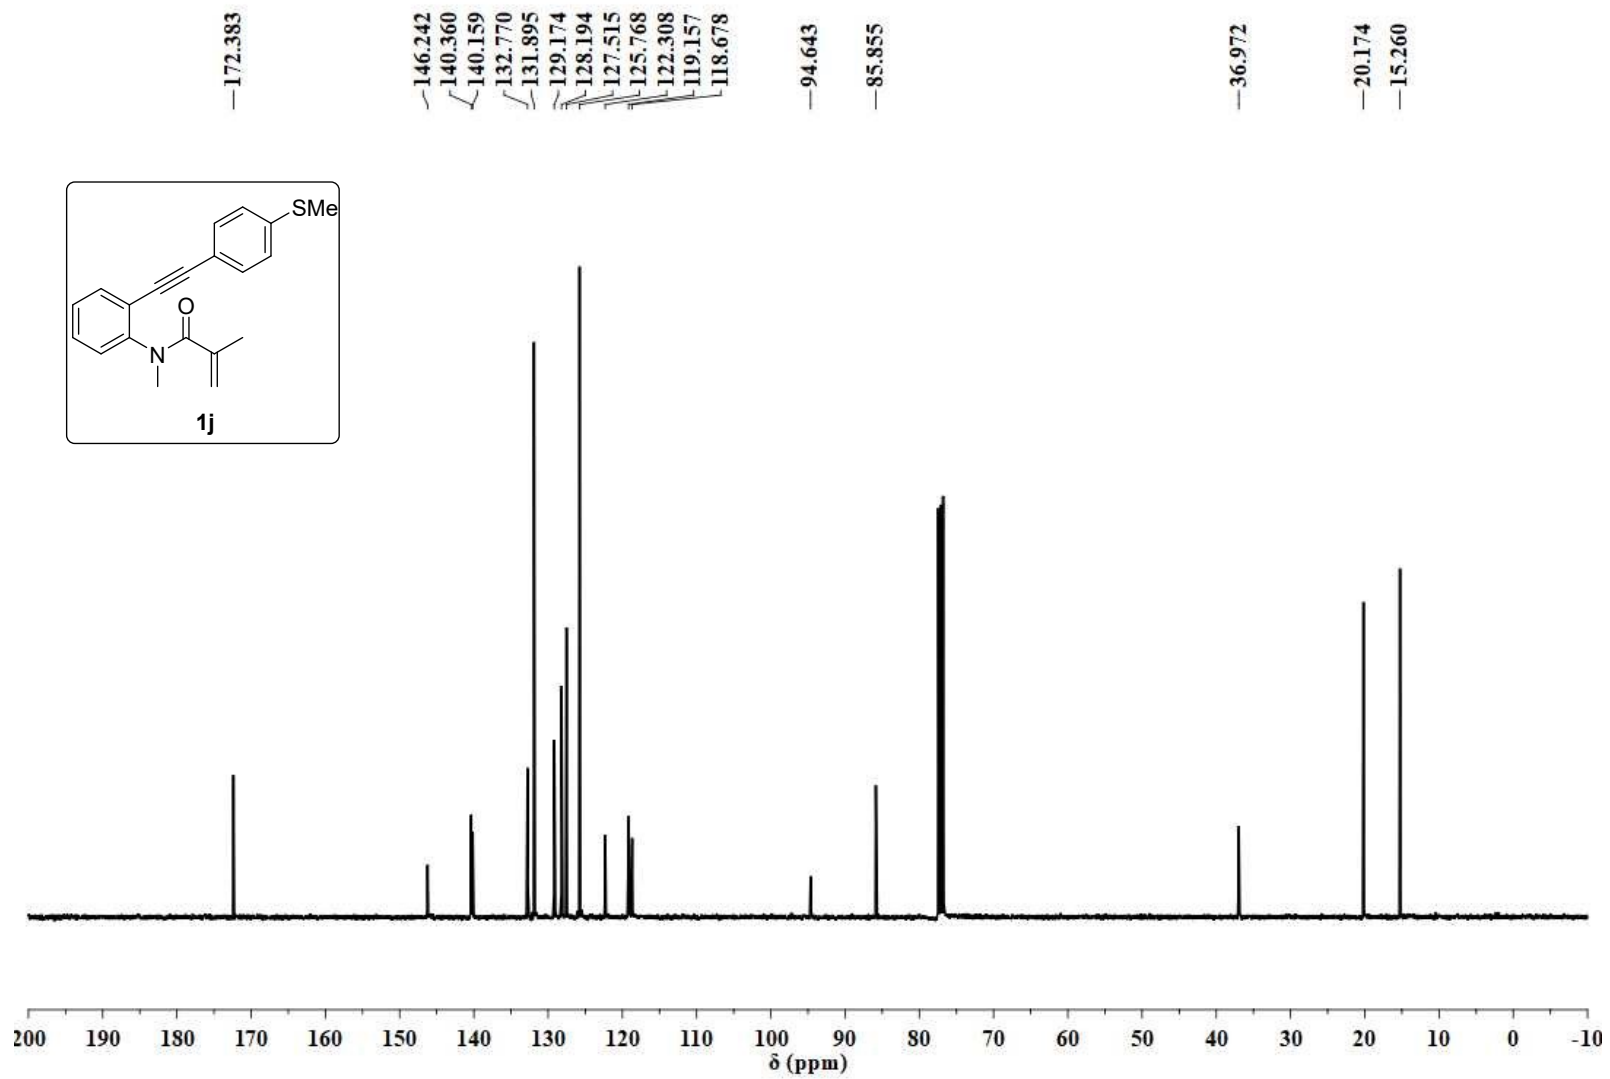

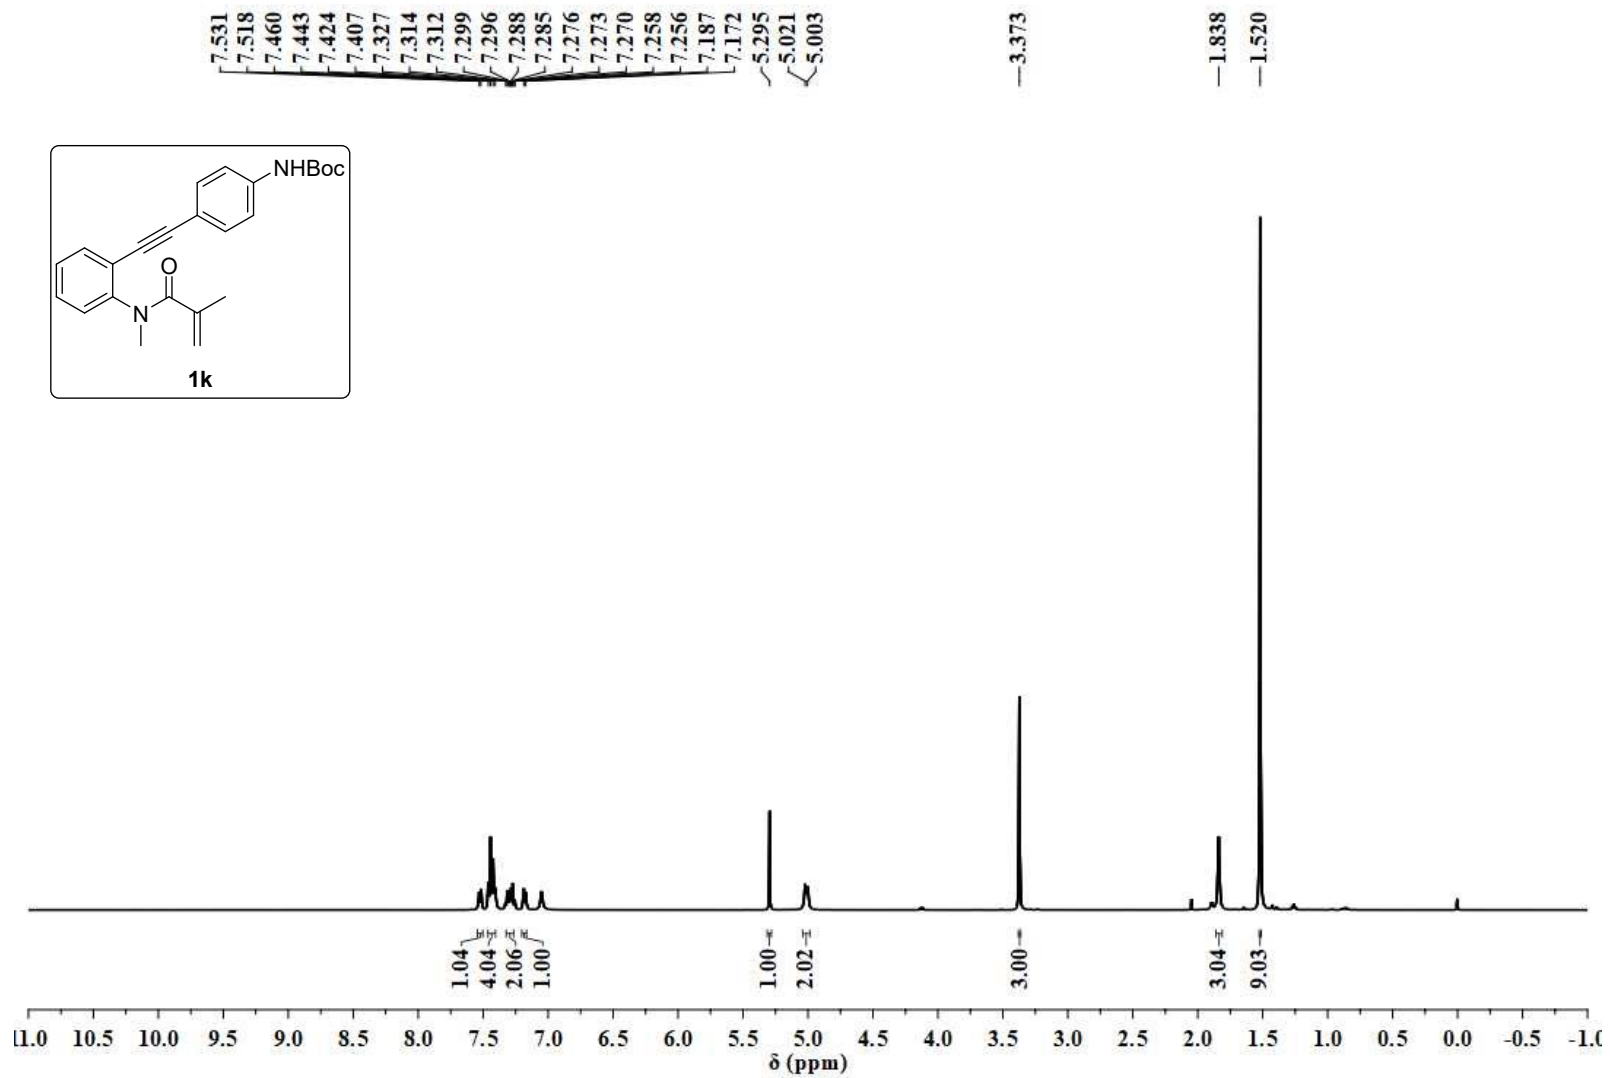

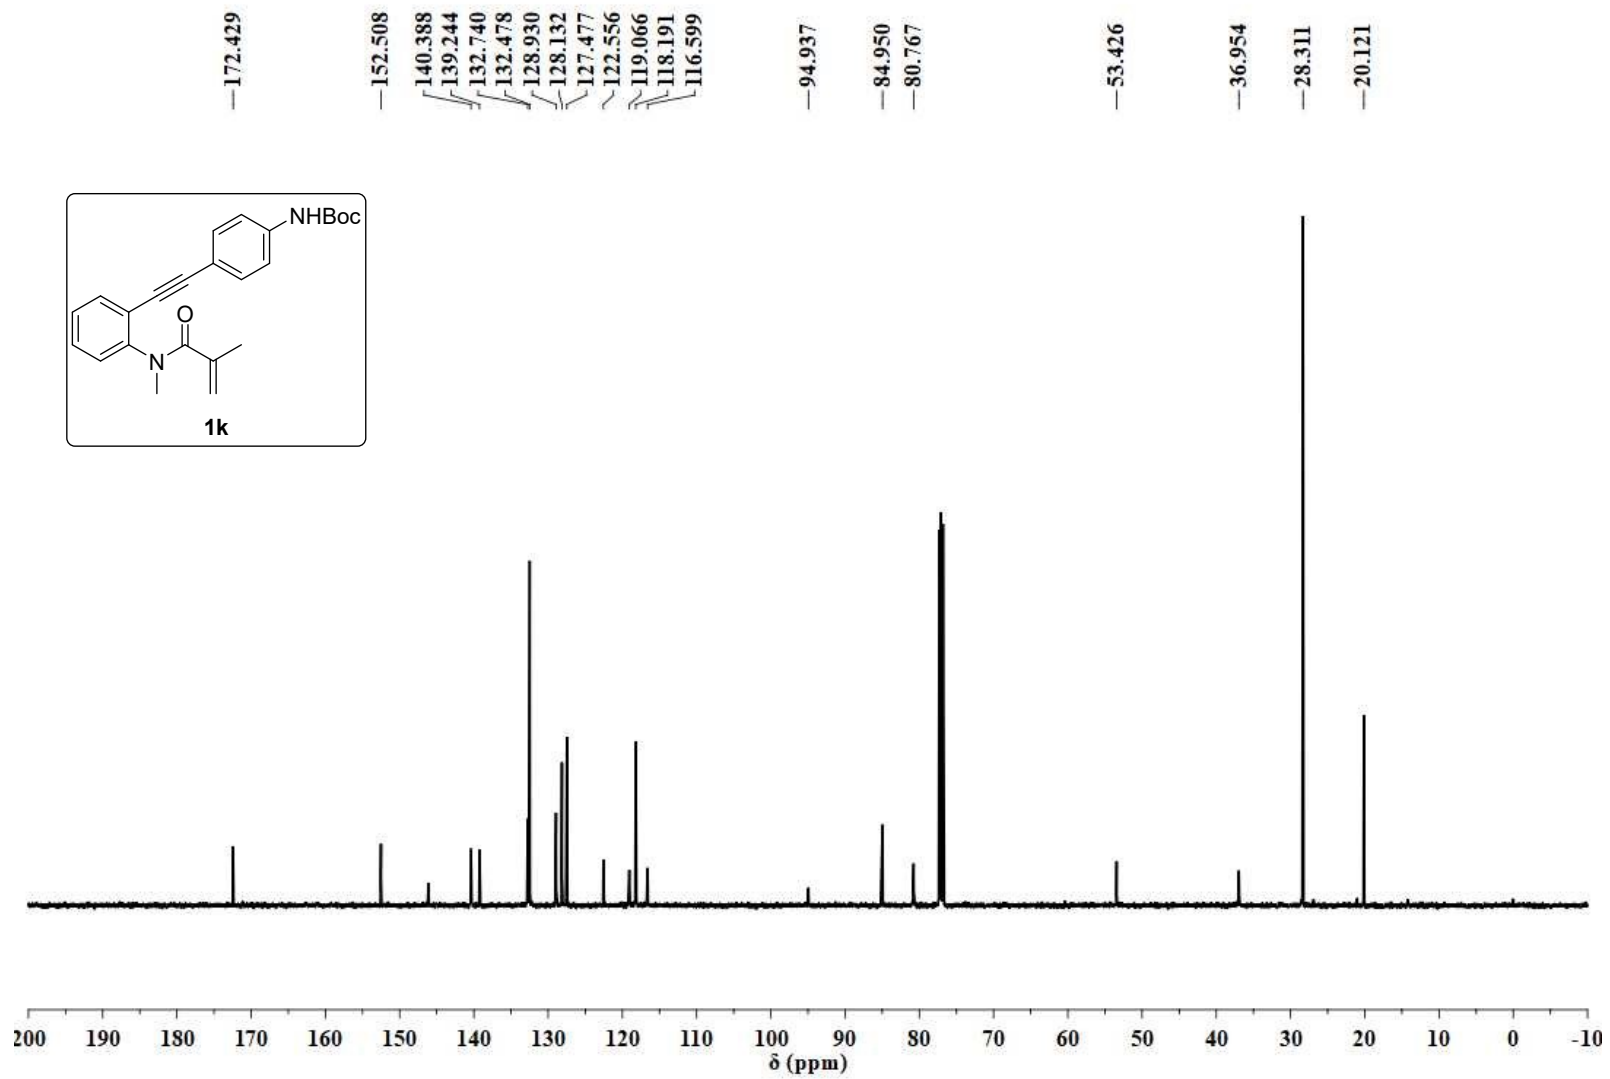



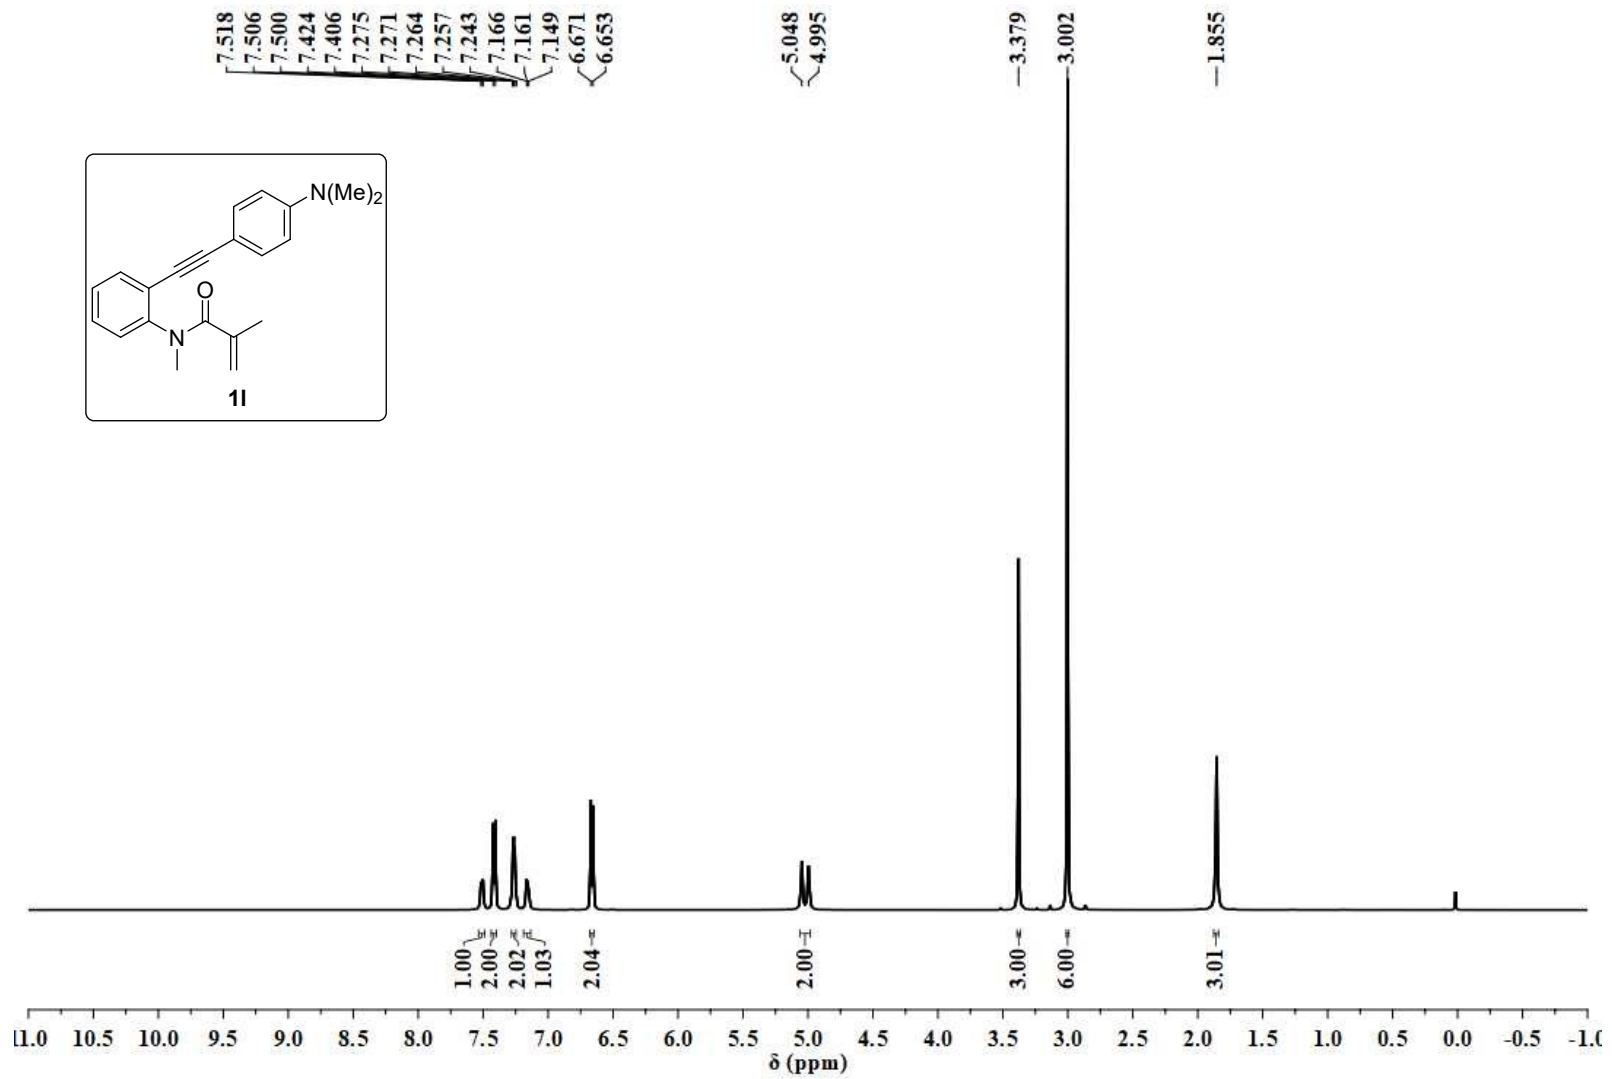

S145

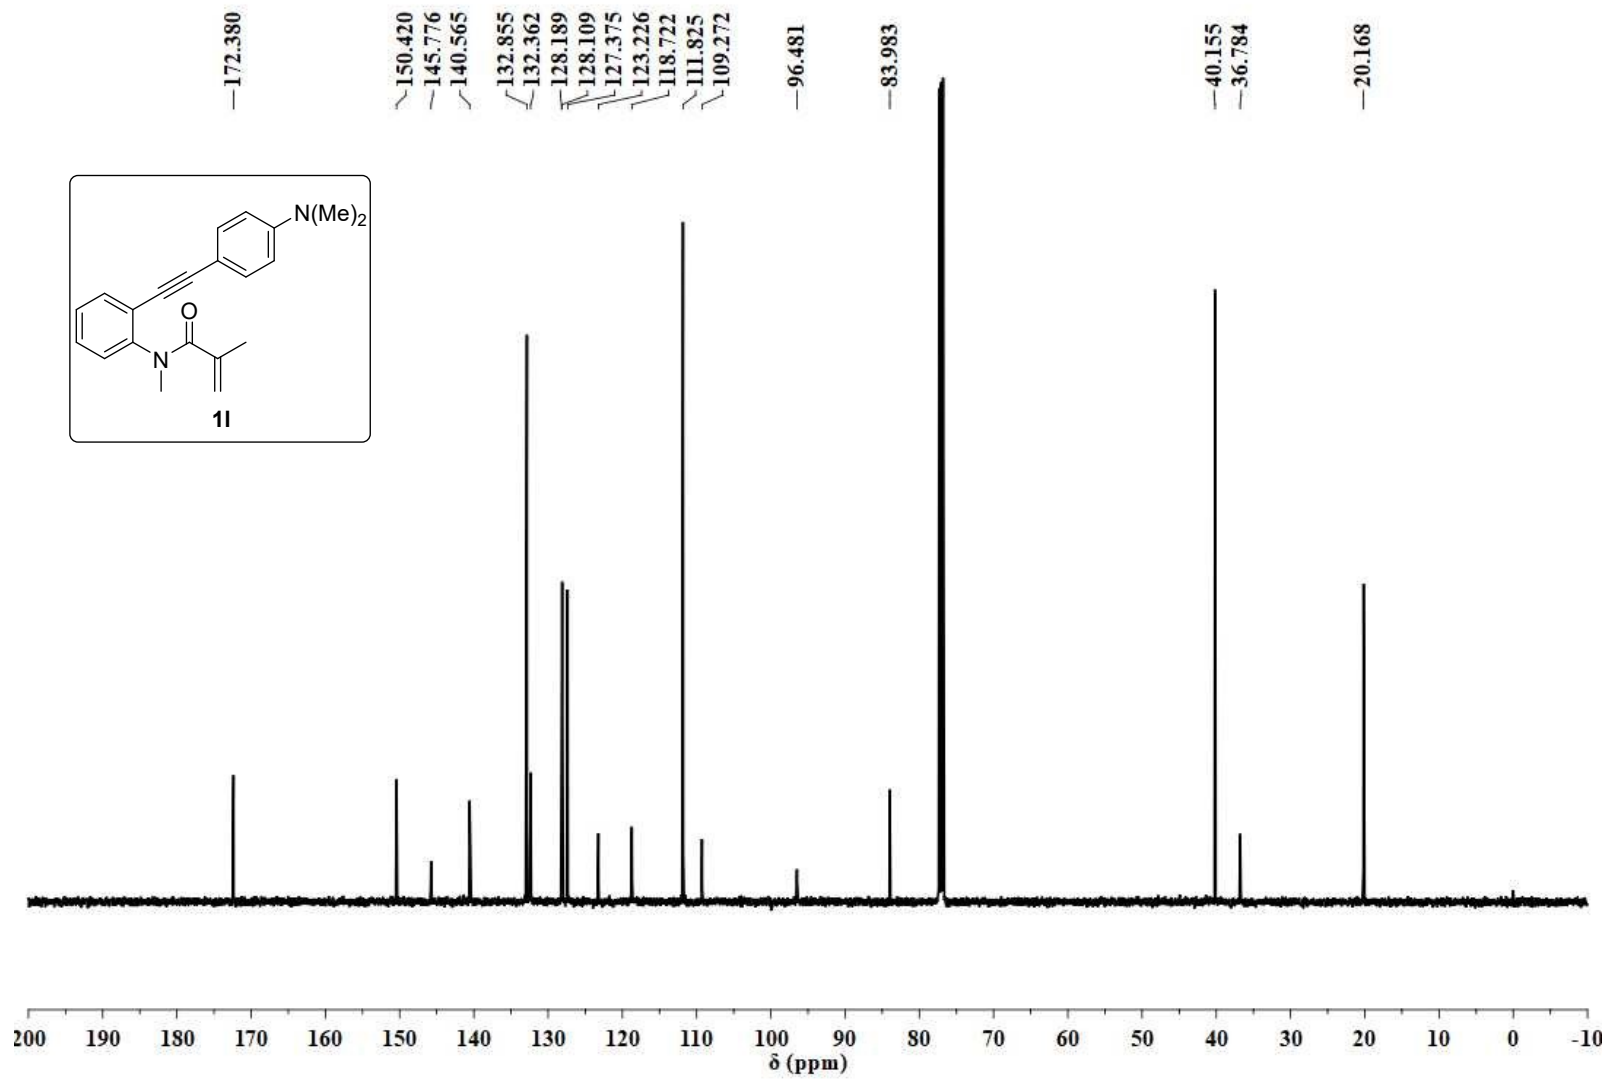

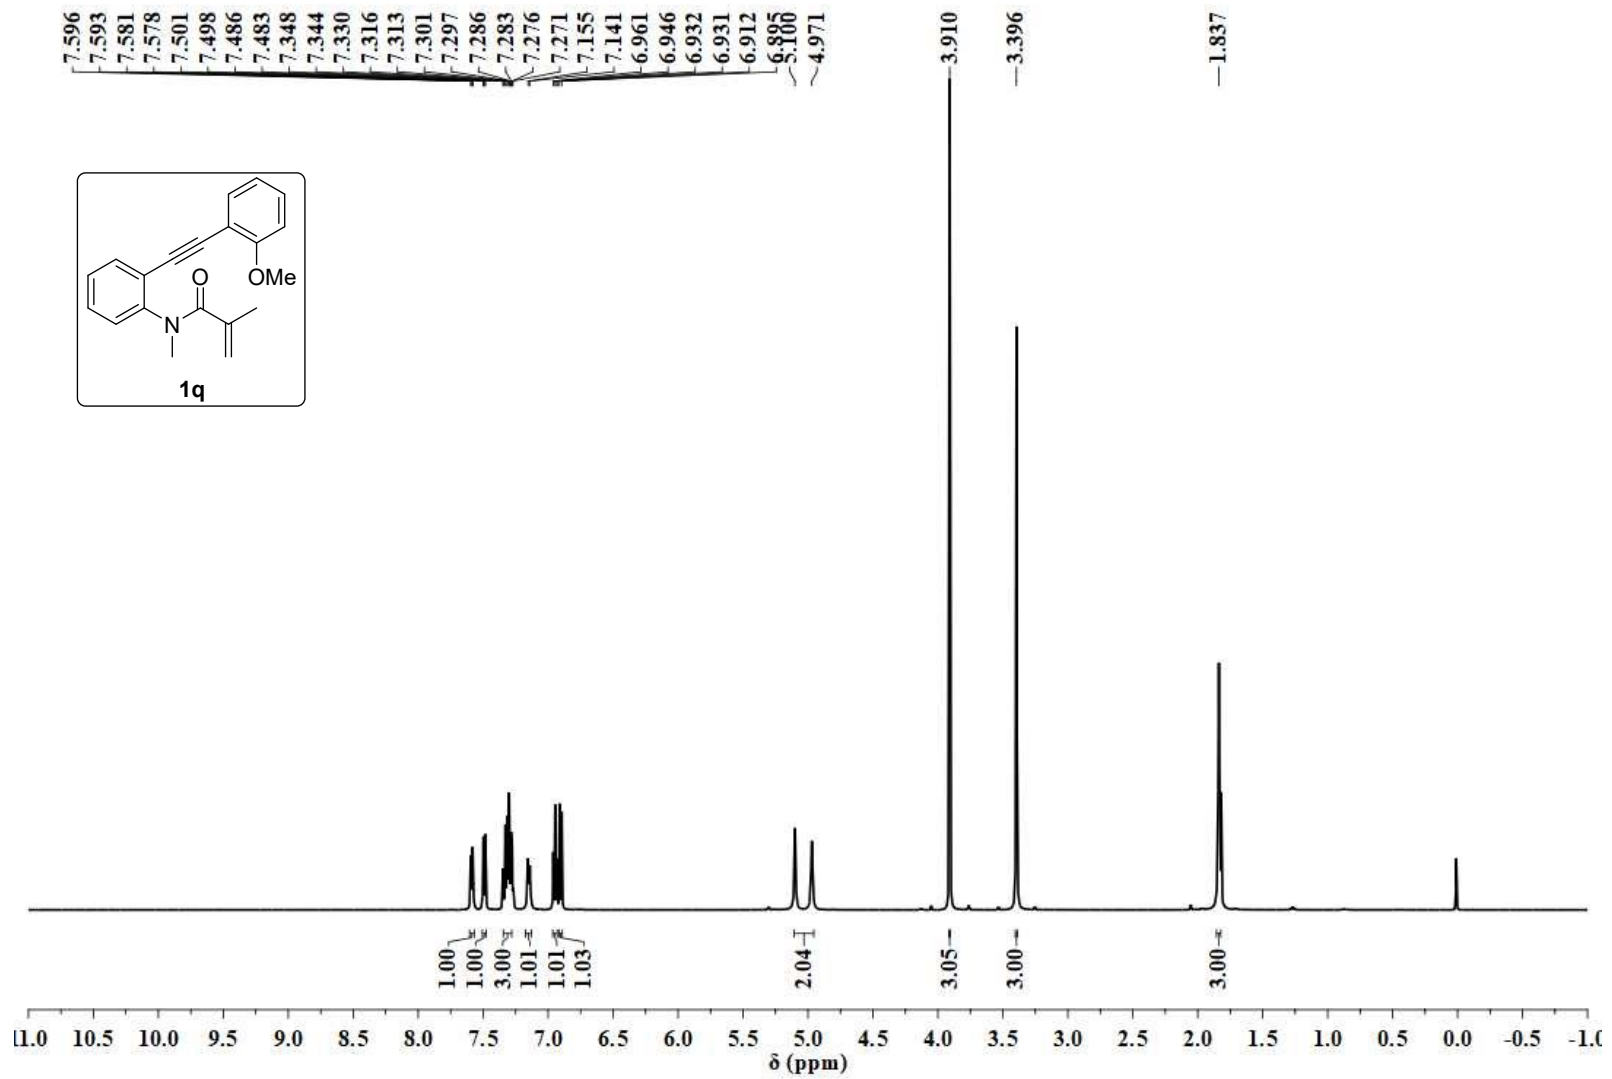

S147

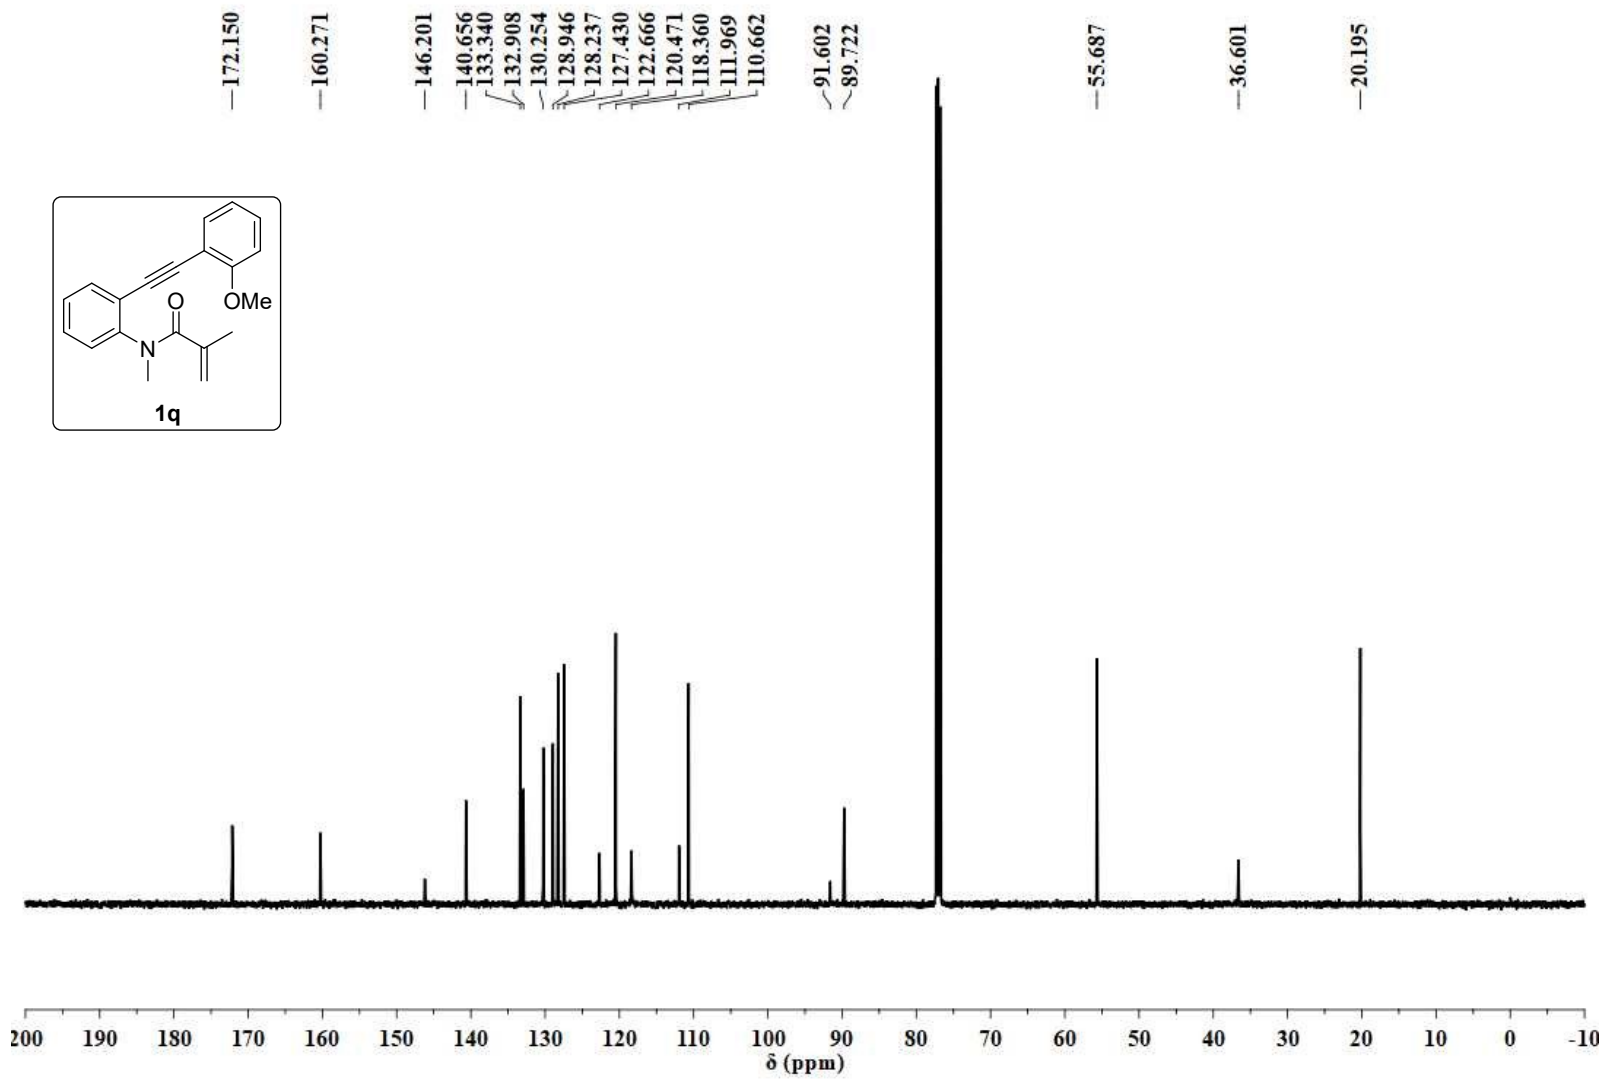

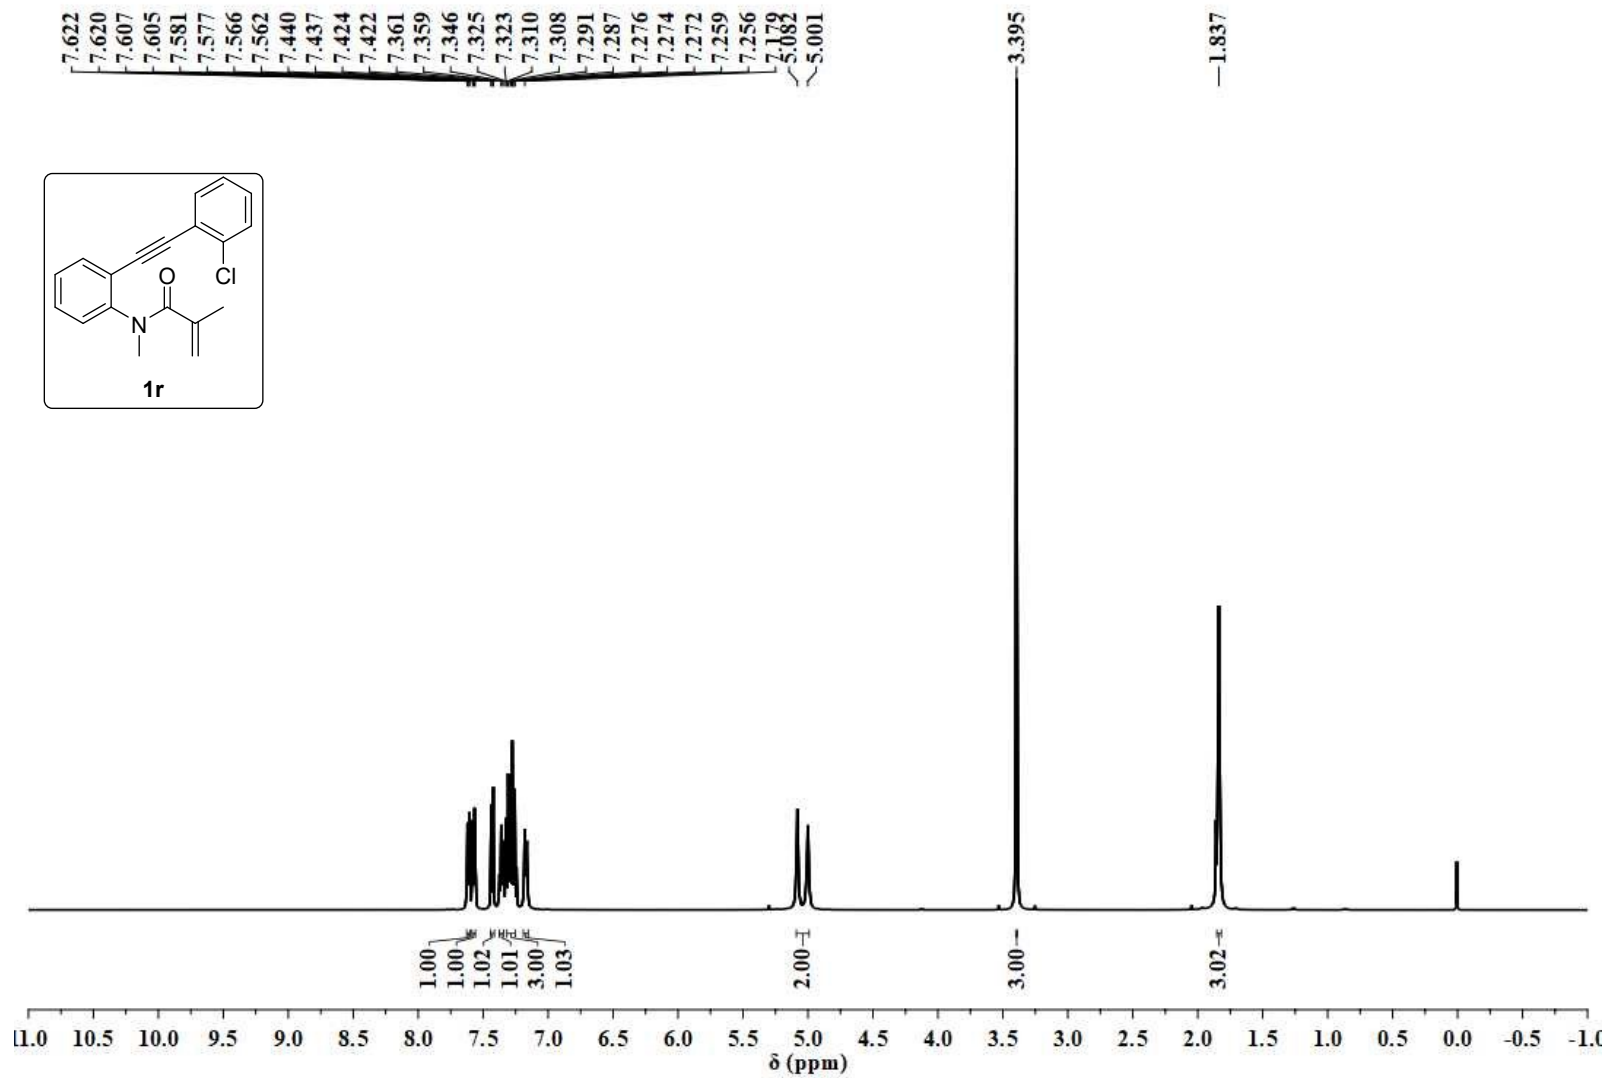

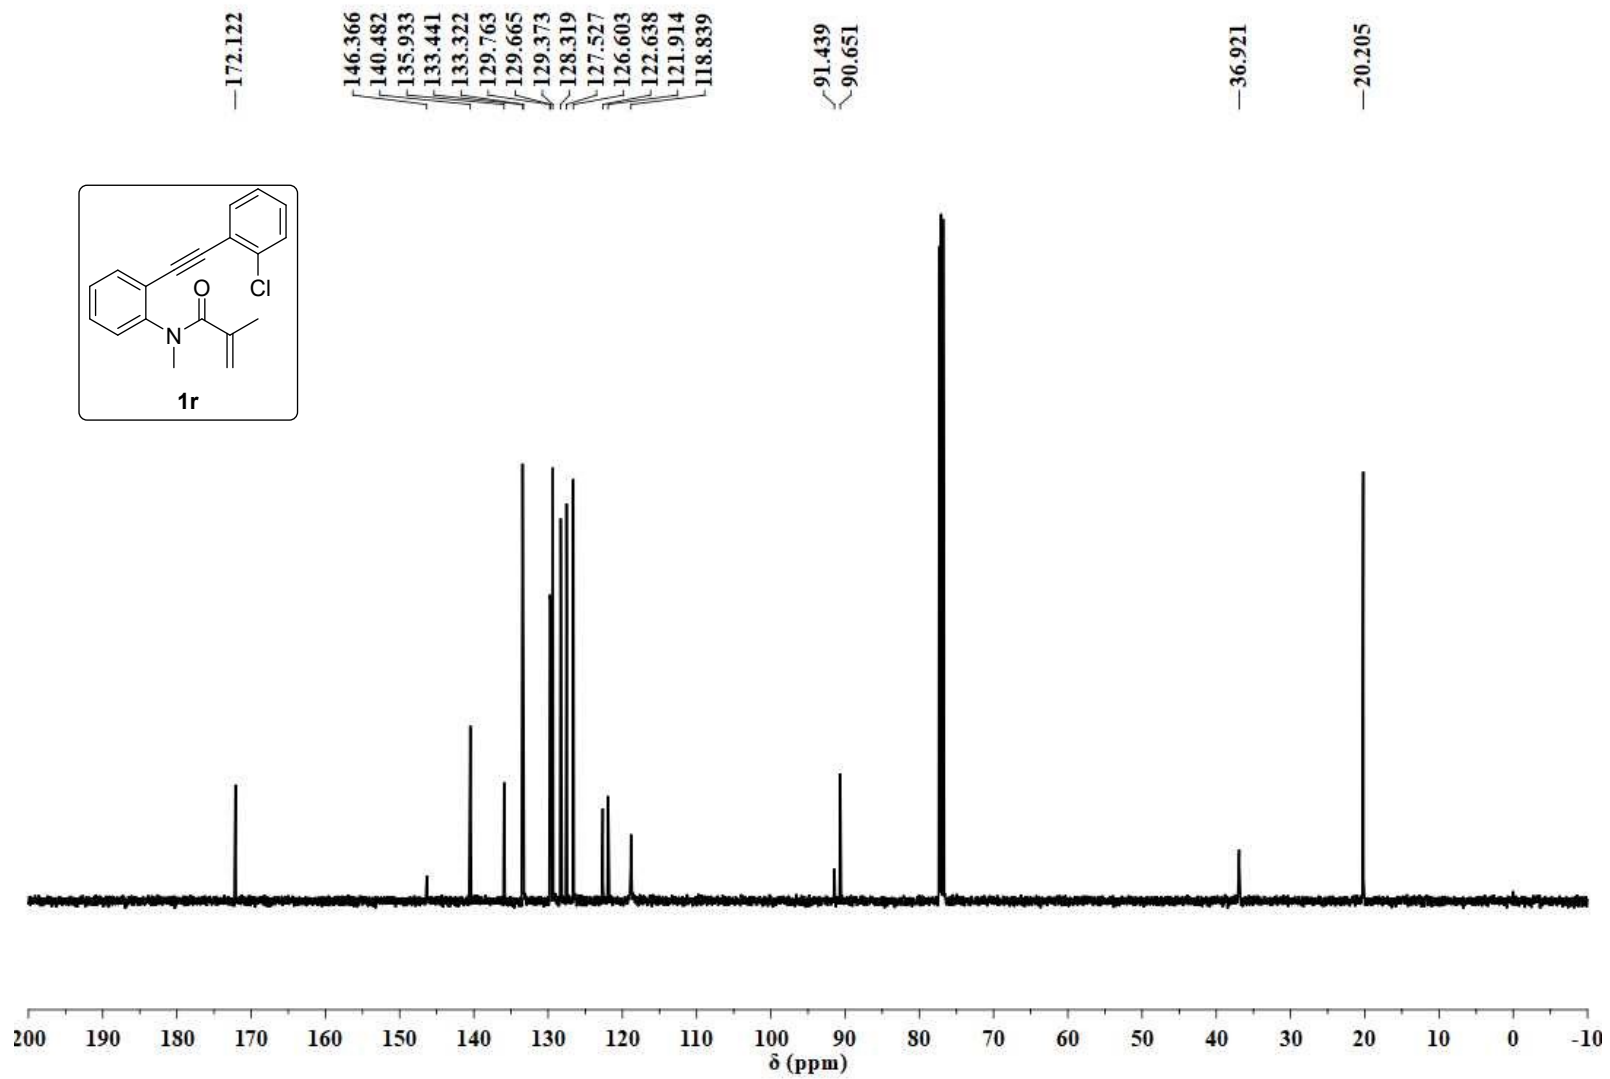

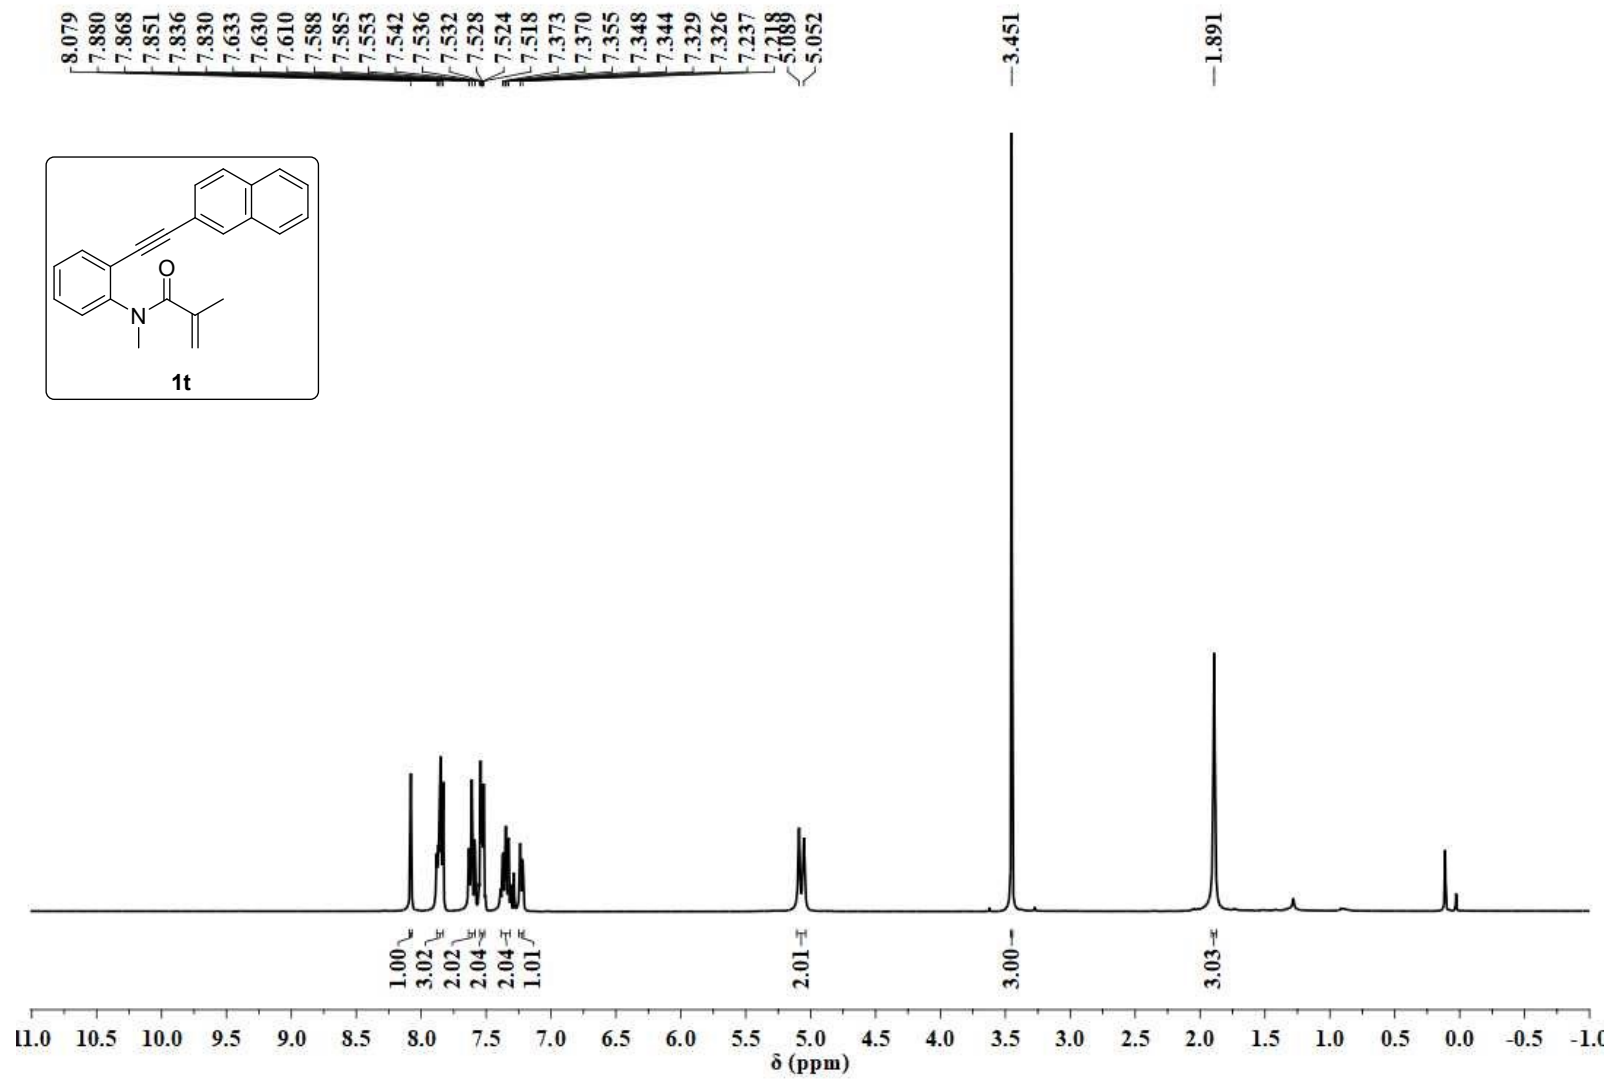





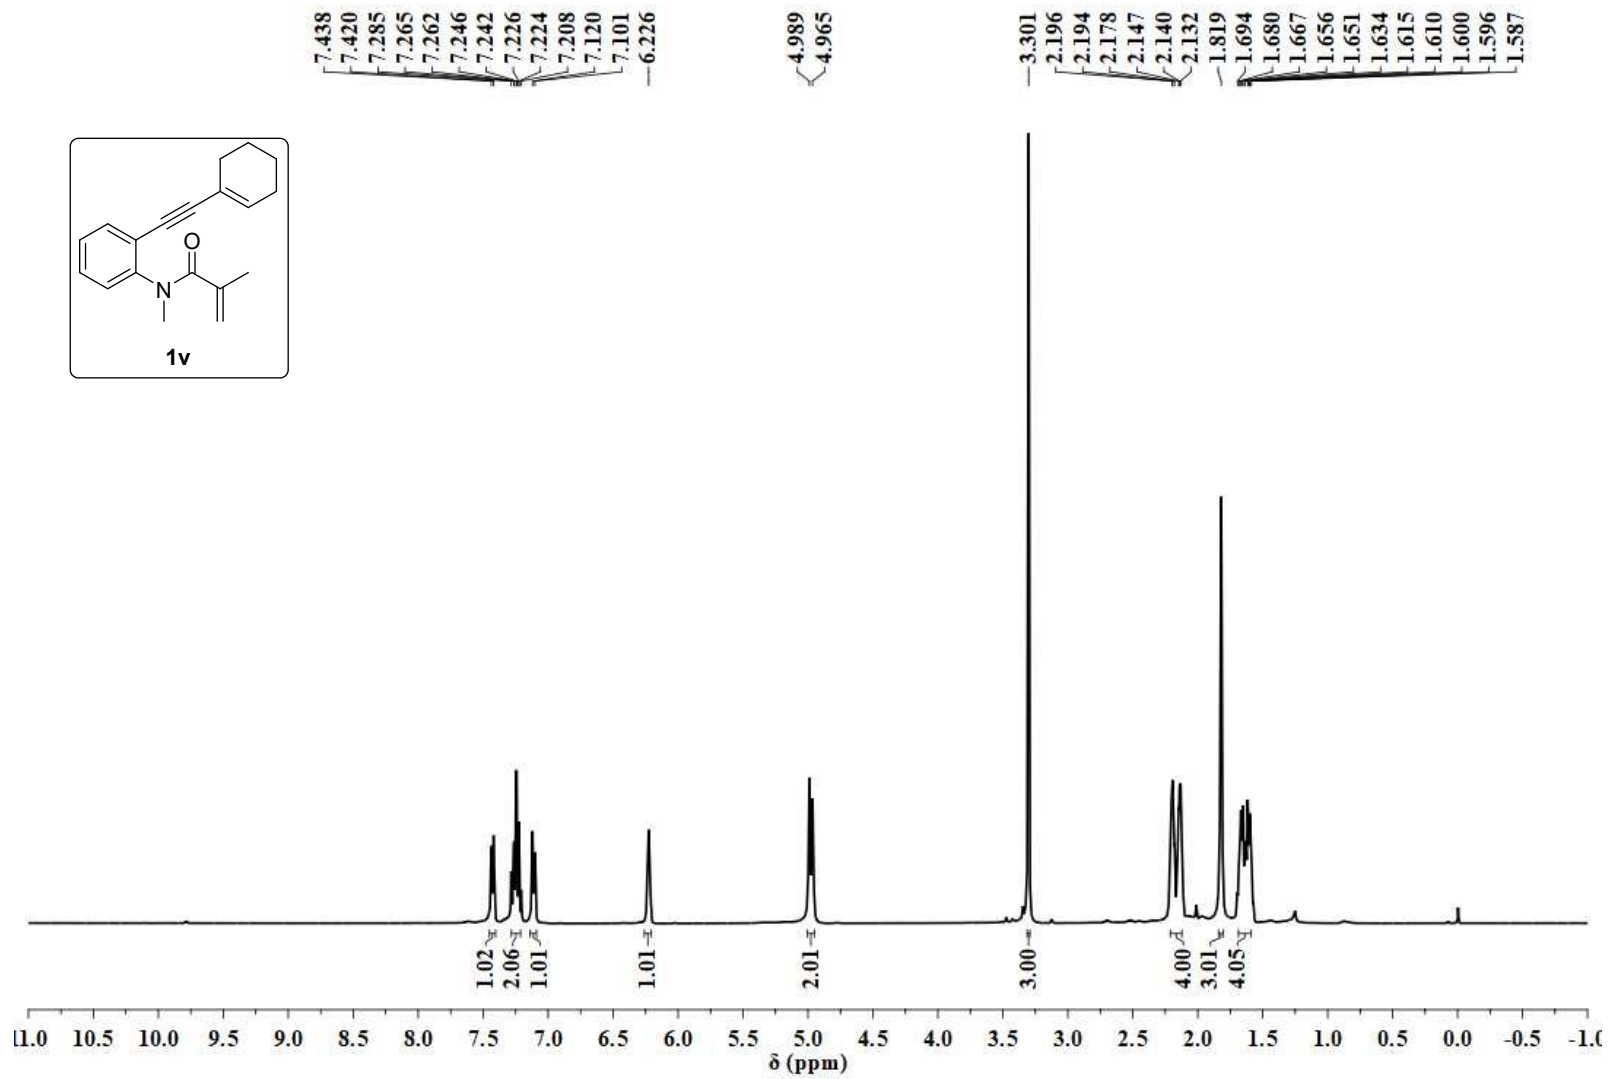

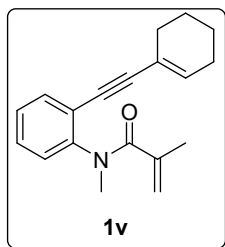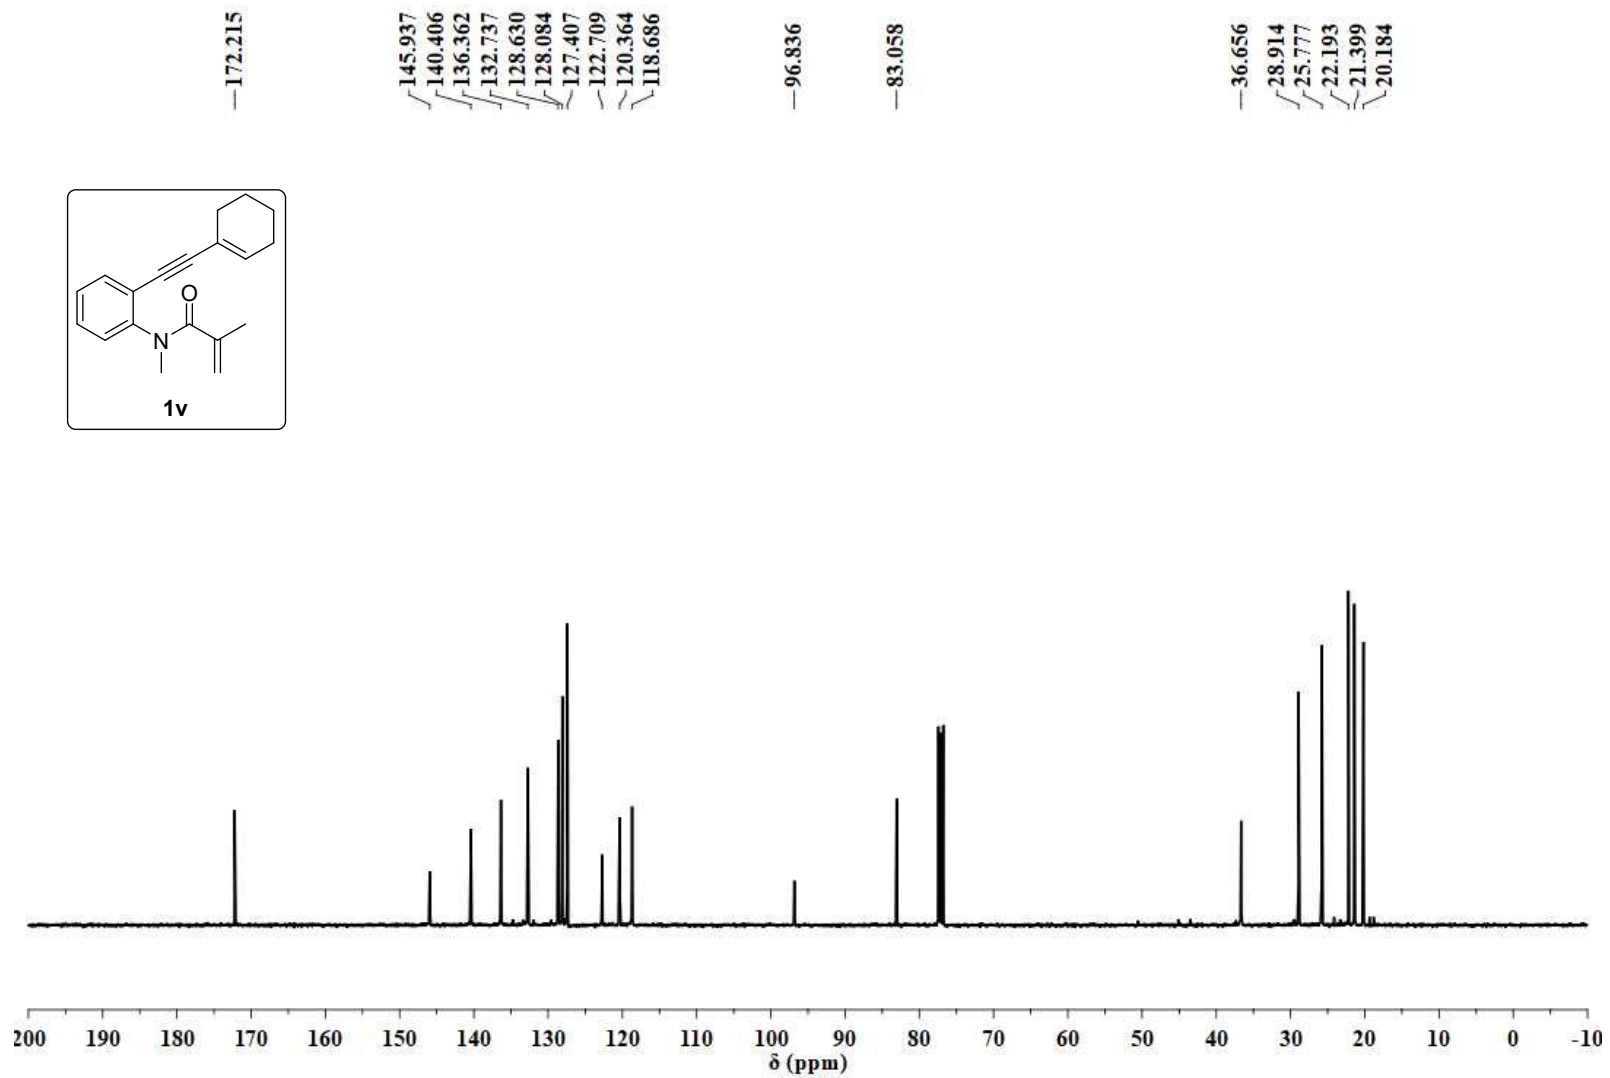

Supplement: d1cc04750g1.pdf [file d1cc04750g1.pdf]
